# Supplementary material
Source: publisher figshare collection journal article supplement (https://acs.figshare.com/ndownloader/files/3821482)

# Ligand-Enabled $\beta$ -C–H Arylation of Alpha-Amino Acids Using a Simple and Practical Auxiliary

Gang Chen, Toshihiko Shigenari, Pankaj Jain, Zhipeng Zhang, Zhong Jin, Jian He, Suhua Li, Claudio Mapelli, Michael M. Miller, Michael A. Poss, Paul M. Scola, Kap-Sun Yeung, Jin-Quan Yu

yu200@scripps.edu

## Table of Contents

|                                                    |      |
|----------------------------------------------------|------|
| General Information                                | S 2  |
| Structures of Substrates and Heterocyclic Iodides  | S 3  |
| Experimental Section                               |      |
| Preparation of Substrates and Heterocyclic Iodides | S 4  |
| Monoarylation                                      | S 13 |
| Removal of the Directing Group                     | S 27 |
| Arylation with Heterocyclic Iodides                | S 30 |
| Arylation of Methylene C–H Bonds                   | S 43 |
| Homo-Diarylation                                   | S 55 |
| Hetero-Diarylation                                 | S 57 |
| Arylation of other Carboxylic Acids                | S 62 |
| Gram-Scale Synthesis of Unnatural Amino Acids      | S 68 |
| Diverse Synthetic Application                      | S 84 |
| References                                         | S 96 |
| <sup>1</sup> H and <sup>13</sup> C NMR Spectra     | S 97 |

**General Information:** Solvents were obtained from Sigma-Aldrich, Alfa-Aesar and Acros and used directly without further purification. Carboxylic acids and carboxylic acid chlorides were obtained from the commercial sources or synthesized following literature procedures, and used to prepare the corresponding amides. Analytical thin layer chromatography was performed on 0.25 mm silica gel 60-F254. Visualization was carried out with UV light and Vogel's permanganate.  $^1\text{H}$  NMR spectra were recorded on Bruker AMX-400 instrument (400 MHz) or Bruker DRX-600 instrument (600 MHz). When the  $^1\text{H}$  NMR solvent was  $\text{CDCl}_3$ , chemical shifts were quoted in parts per million (ppm) referenced to 0.00 ppm for tetramethylsilane; When the  $^1\text{H}$  NMR solvent was MeOD, chemical shifts were quoted in parts per million (ppm) referenced to 3.31 ppm for solvent MeOD; When the  $^1\text{H}$  NMR solvent was Acetone-*d*-6, chemical shifts were quoted in parts per million (ppm) referenced to 2.05 ppm for solvent Acetone-*d*-6. The following abbreviations (or combinations thereof) were used to explain multiplicities: s = singlet, d = doublet, t = triplet, q = quartet, m = multiplet, br = broad. Coupling constants, *J*, were reported in Hertz unit (Hz).  $^{13}\text{C}$  NMR spectra were recorded on Bruker DRX-600 instrument (150 MHz), and were fully decoupled by broad band proton decoupling. When the  $^{13}\text{C}$  NMR solvent was  $\text{CDCl}_3$ , chemical shifts were reported in ppm referenced to 0.0 ppm for tetramethylsilane; When the  $^{13}\text{C}$  NMR solvent was MeOD, chemical shifts were quoted in parts per million (ppm) referenced to 49.1 ppm for solvent MeOD; When the  $^{13}\text{C}$  NMR solvent was Acetone-*d*-6, chemical shifts were quoted in parts per million (ppm) referenced to 29.9 ppm for solvent Acetone-*d*-6. High-resolution mass spectra (HRMS) were recorded on an Agilent Mass spectrometer using ESI-TOF (electrospray ionization-time of flight). Melting points were obtained from a Mel-temp II apparatus (uncorrected). HPLC profiles were obtained on a Hitachi LaChrom Elite HPLC system using commercially available chiral columns.

## Structures of Substrates

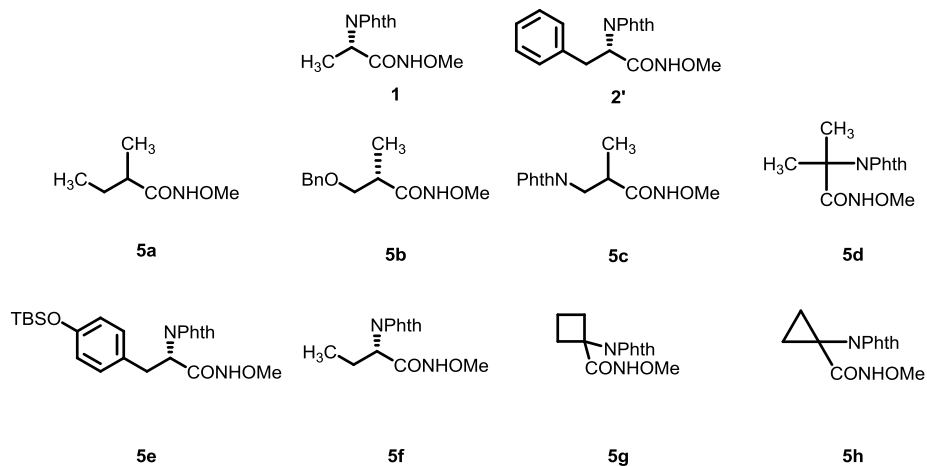

## Structures of Heterocyclic Iodides prepared in our laboratory

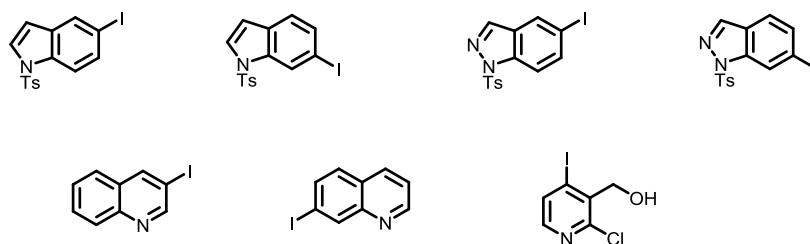

## Experimental Section

### A. Preparation of Substrates

#### General Method A (Amino Acid Substrates):

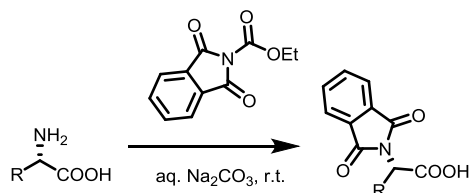

**Synthesis of phthalimide-protected amino acids:**<sup>1</sup> amino acid (1 equiv) and Na<sub>2</sub>CO<sub>3</sub> (1 equiv) were dissolved in water (1M) at room temperature and *N*-ethoxycarbonylphthalimide (1 equiv) was added to the solution in small portions. The reaction was stirred for 3 hours at room temperature, and then the aqueous solution was cooled to °C and slowly acidified with aqueous HCl (6 M) until pH of 1-2 was attained and white precipitate was observed. The precipitate was collected and washed with aqueous HCl (20 mL, 1M) and EtOAc/hexanes = 1/5 (20 mL) to give phthalimide-protected amino acid in high yields.

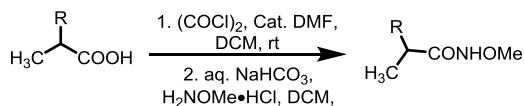

**Synthesis of *N*-methoxy amides from acids:** To a 250 mL round-bottom flask were added the acid (50 mmol, 1 equiv), DCM (100 mL), and 0.05 mL DMF, oxalyl chloride (100 mmol, 8.5 mL, 2 equiv) was added slowly to the mixture, the above mixture were reacted for 3 h at room temperature. Then, the excess of oxalyl chloride and DCM were removed *in vacuo*, and the crude acid chloride in DCM (60 mL) was added slowly to a vigorously stirring solution of H<sub>2</sub>NOMe•HCl (60 mmol, 5.0 g, 1.2 equiv) and NaHCO<sub>3</sub> (120 mmol, 2.4 equiv), in DCM (60 mL) and water (60 mL) in ice cooled bath. The reaction mixture was stirred for 3 h at 0 °C (monitored by TLC), after which H<sub>2</sub>O and DCM was added to the reaction mixture. The aqueous layer was then extracted with DCM (3 ×) and the combined organics were washed with brine, dried over Na<sub>2</sub>SO<sub>4</sub>, filtered and concentrated. The product was recrystallized in DCM/hexanes to give the pure amide (over 90% yield).



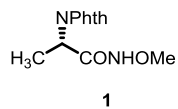

### (S)-2-(1,3-Dioxisoindolin-2-yl)-N-methoxypropanamide (1)

White solid. m.p. = 126-127 °C. <sup>1</sup>H NMR (400 MHz, CDCl<sub>3</sub>) δ 8.93 (s, 1H), 7.89-7.86 (m, 2H), 7.78-7.75 (m, 2H), 4.97 (m, 1H), 3.77 (s, 3H), 1.70 (d, *J* = 7.4 Hz, 3H). The ee value was determined by HPLC analysis on a Chiralcel OD-H column (20% isopropanol in hexanes, 0.4 mL/min) with *t<sub>r</sub>* = 32.2 min (minor), 37.8 min (major): 99% ee.

### Area % Report

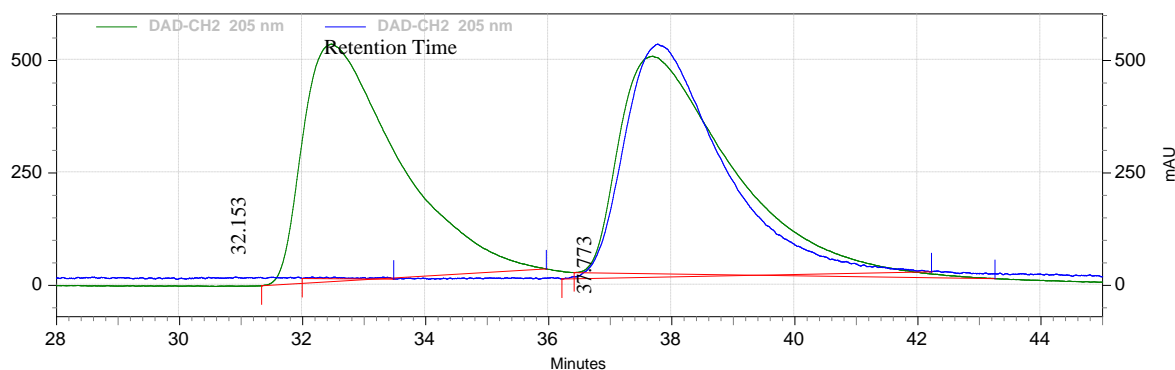

#### DAD-CH2 205 nm

#### Results

| Retention Time | Area     | Area % | Height | Height % |
|----------------|----------|--------|--------|----------|
| 32.153         | 208785   | 0.34   | 3727   | 0.67     |
| 37.773         | 61441667 | 99.66  | 552430 | 99.33    |

|        |          |        |        |        |
|--------|----------|--------|--------|--------|
| Totals | 61650452 | 100.00 | 556157 | 100.00 |
|--------|----------|--------|--------|--------|

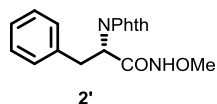

**(S)-2-(1,3-Dioxoisindolin-2-yl)-N-methoxy-3-phenylpropanamide (2')**

$^1\text{H}$  NMR (600 MHz,  $\text{CDCl}_3$ )  $\delta$  9.31 (s, 1H), 7.78-7.75 (m, 2H), 7.71-7.68 (m, 2H), 7.18-7.11 (m, 5H), 5.08 (m, 1H), 3.75 (s, 3H), 3.54-3.40 (m, 2H);  $^{13}\text{C}$  NMR (150 MHz,  $\text{CDCl}_3$ )  $\delta$  167.90, 166.58, 136.07, 134.40, 131.25, 128.89, 128.67, 127.10, 123.60, 64.52, 54.57, 34.75; HRMS (ESI-TOF) Calcd for  $\text{C}_{18}\text{H}_{17}\text{N}_2\text{O}_4$   $[\text{M}+\text{H}]^+$ : 325.1183; found: 325.1185. The ee value was determined by HPLC analysis on a Chiralcel OD-H column (20% isopropanol in hexanes, 0.4 mL/min) with  $t_r$  = 39.4 min (minor), 48.3 min (major): 99% ee.

**Area % Report**

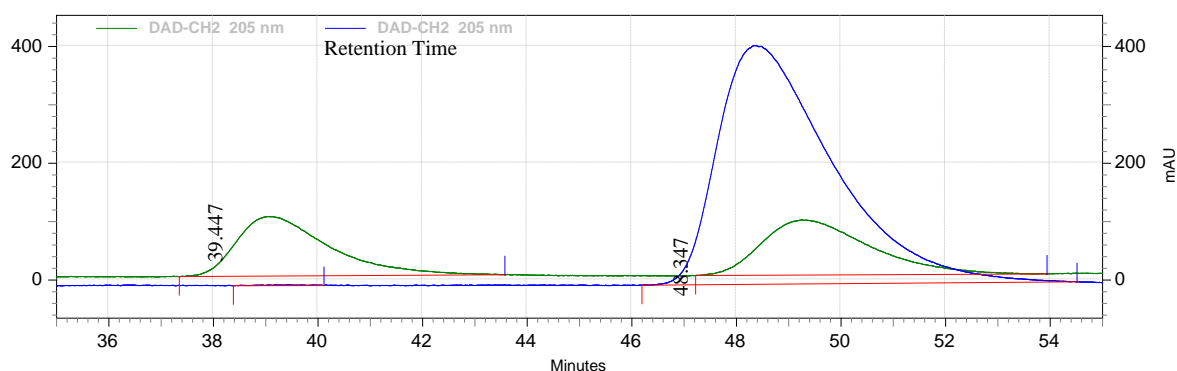

**DAD-CH2 205 nm**

**Results**

| Retention Time | Area      | Area % | Height  | Height % |
|----------------|-----------|--------|---------|----------|
| 39.447         | 287676    | 0.12   | 5658    | 0.34     |
| 48.347         | 249491625 | 99.88  | 1635575 | 99.66    |

|        |           |        |         |        |
|--------|-----------|--------|---------|--------|
| Totals | 249779301 | 100.00 | 1641233 | 100.00 |
|--------|-----------|--------|---------|--------|

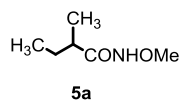

### ***N*-Methoxy-2-methylbutanamide (5a)**

$^1\text{H}$  NMR (600 MHz,  $\text{CDCl}_3$ )  $\delta$  8.38 (s, 1H), 3.77 (s, 3H), 1.99 (m, 1H), 1.73-1.66 (m, 1H), 1.49-1.42 (m, 1H), 1.15 (d,  $J = 7.2$  Hz, 3H), 0.92 (t,  $J = 7.8$  Hz, 3H);  $^{13}\text{C}$  NMR (150 MHz,  $\text{CDCl}_3$ )  $\delta$  174.32, 64.47, 39.92, 27.00, 17.26, 11.78; HRMS (ESI-TOF) Calcd for  $\text{C}_6\text{H}_{14}\text{NO}_2$   $[\text{M}+\text{H}]^+$ : 132.1019; found: 132.1020.

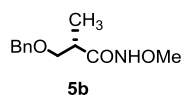

### **(S)-3-(Benzyloxy)-*N*-methoxy-2-methylpropanamide (5b)**

$^1\text{H}$  NMR (600 MHz,  $\text{CDCl}_3$ )  $\delta$  8.83 (s, 1H), 7.37-7.30 (m, 5H), 4.55-4.50 (m, 2H), 3.73 (s, 3H), 3.53-3.50 (m, 2H), 2.49 (m, 1H), 1.15 (d,  $J = 7.2$  Hz, 3H);  $^{13}\text{C}$  NMR (150 MHz,  $\text{CDCl}_3$ )  $\delta$  172.91, 137.44, 128.54, 127.97, 127.77, 73.48, 71.82, 64.31, 38.84, 13.36; HRMS (ESI-TOF) Calcd for  $\text{C}_{12}\text{H}_{18}\text{NO}_3$   $[\text{M}+\text{H}]^+$ : 224.1281; found: 224.1284.

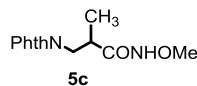

### **3-(1,3-Dioxoisindolin-2-yl)-*N*-methoxy-2-methylpropanamide (5c)**

White solid. m.p. = 182-184 °C.  $^1\text{H}$  NMR (600 MHz,  $\text{CDCl}_3$ )  $\delta$  8.45 (s, 1H), 7.86-7.85 (m, 2H), 7.74-7.72 (m, 2H), 3.93 (dd,  $J = 13.5, 7.5$  Hz, 1H), 3.77 (dd,  $J = 14.1, 6.5$  Hz, 1H), 3.70 (s, 3H), 2.73 (m, 1H), 1.23 (d,  $J = 7.2$  Hz, 3H);  $^{13}\text{C}$  NMR (150 MHz,  $\text{CDCl}_3$ )  $\delta$  171.23, 168.26, 134.19, 131.82, 123.44, 64.43, 40.88, 37.36, 15.31; HRMS (ESI-TOF) Calcd for  $\text{C}_{13}\text{H}_{15}\text{N}_2\text{O}_4$   $[\text{M}+\text{H}]^+$ : 263.1026; found: 263.1027.

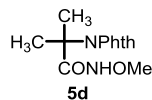

### **2-(1,3-Dioxoisindolin-2-yl)-*N*-methoxy-2-methylpropanamide (5d)**

White solid. m.p. = 172-175 °C.  $^1\text{H}$  NMR (600 MHz,  $\text{CDCl}_3$ )  $\delta$  8.57 (s, 1H), 7.81-7.78 (m, 2H), 7.73-7.70 (m, 2H), 3.81 (s, 3H), 1.84 (s, 6H), 1.67 (m, 1H);  $^{13}\text{C}$  NMR (150 MHz,  $\text{CDCl}_3$ )  $\delta$  171.35, 168.44, 134.19, 131.77, 123.19, 64.15, 60.26, 24.51; HRMS (ESI-TOF) Calcd for  $\text{C}_{13}\text{H}_{15}\text{N}_2\text{O}_4$   $[\text{M}+\text{H}]^+$ : 263.1026; found: 263.1022.

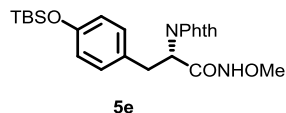

**(S)-3-(4-((*tert*-Butyldimethylsilyl)oxy)phenyl)-2-(1,3-dioxisoindolin-2-yl)-N-methoxypropanamide (5e)**

$^1\text{H}$  NMR (600 MHz,  $\text{CDCl}_3$ )  $\delta$  9.30 (s, 1H), 7.77-7.74 (m, 2H), 7.70-7.67 (m, 2H), 6.99 (d,  $J$  = 8.0 Hz, 2H), 6.63 (d,  $J$  = 8.4 Hz, 2H), 5.05 (m, 1H), 3.75 (s, 3H), 3.43-3.41 (m, 2H), 0.89 (s, 9H), 0.06 (s, 3H), 0.05 (s, 3H);  $^{13}\text{C}$  NMR (150 MHz,  $\text{CDCl}_3$ )  $\delta$  167.90, 166.70, 154.60, 134.33, 131.24, 129.90, 128.65, 123.54, 120.37, 64.50, 54.76, 34.05, 25.62, 18.15, -4.55; HRMS (ESI-TOF) Calcd for  $\text{C}_{24}\text{H}_{31}\text{N}_2\text{O}_5\text{Si}$   $[\text{M}+\text{H}]^+$ : 455.1997; found: 455.2000.

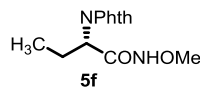

**(S)-2-(1,3-Dioxisoindolin-2-yl)-N-methoxybutanamide (5f)**

White solid. m.p. = 153-155 °C.  $^1\text{H}$  NMR (600 MHz,  $\text{CDCl}_3$ )  $\delta$  9.22 (s, 1H), 7.89-7.88 (m, 2H), 7.78-7.76 (m, 2H), 4.76 (m, 1H), 3.76 (s, 3H), 2.23-2.18 (m, 2H), 0.94 (t,  $J$  = 7.5 Hz, 3H);  $^{13}\text{C}$  NMR (150 MHz,  $\text{CDCl}_3$ )  $\delta$  168.15, 161.93, 134.54, 131.44, 123.75, 64.57, 55.29, 22.43, 10.77; HRMS (ESI-TOF) Calcd for  $\text{C}_{13}\text{H}_{15}\text{N}_2\text{O}_4$   $[\text{M}+\text{H}]^+$ : 263.1026; found: 263.1023.

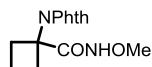

**1-(1,3-Dioxisoindolin-2-yl)-N-methoxycyclobutane-1-carboxamide (5g)**

White solid. m.p. = 196-200 °C.  $^1\text{H}$  NMR (600 MHz,  $\text{CDCl}_3$ )  $\delta$  8.93 (s, 1H), 7.85-7.82 (m, 2H), 7.76-7.73 (m, 2H), 3.76 (s, 3H), 3.02-2.98 (m, 2H), 2.74-2.68 (m, 2H), 2.13-2.10 (m, 1H), 1.98-1.95 (m, 1H);  $^{13}\text{C}$  NMR (150 MHz,  $\text{CDCl}_3$ )  $\delta$  169.35, 167.87, 134.42, 131.77, 123.46, 64.45, 59.19, 31.78, 17.58; HRMS (ESI-TOF) Calcd for  $\text{C}_{14}\text{H}_{15}\text{N}_2\text{O}_4$   $[\text{M}+\text{H}]^+$ : 275.1026; found: 275.1029.

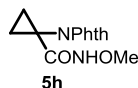

### 1-(1,3-Dioxoisindolin-2-yl)-*N*-methoxycyclopropane-1-carboxamide (5h)

White solid. m.p. = 208-212 °C.  $^1\text{H}$  NMR (600 MHz,  $\text{CDCl}_3$ )  $\delta$  8.52 (s, 1H), 7.90-7.88 (m, 2H), 7.80-7.79 (m, 2H), 3.70 (s, 3H), 1.87-1.85 (m, 2H), 1.33-1.31 (m, 2H);  $^{13}\text{C}$  NMR (150 MHz,  $\text{CDCl}_3$ )  $\delta$  168.56, 167.81, 134.74, 131.29, 123.78, 64.53, 31.86, 16.25; HRMS (ESI-TOF) Calcd for  $\text{C}_{13}\text{H}_{13}\text{N}_2\text{O}_4$   $[\text{M}+\text{H}]^+$ : 261.0870; found: 261.0871.

## B. Preparation of Heterocyclic Iodides

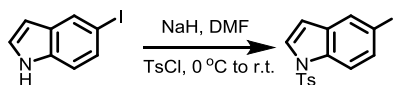

Sodium hydride (60% dispersion in mineral oil, 2.4 g, 60.0 mmol) was suspended in 50 ml *N,N*-dimethylformamide (DMF) and the mixture was cooled in an ice-bath. A solution of 5-iodo-1 *H*-indole (9.72 g, 40.0 mmol) in 25 ml DMF was added dropwise over 10 min and the mixture was stirred for 30 min. A solution of 4-methylbenzene-1-sulfonyl chloride (9.17 g, 48.0 mmol) in 25 ml DMF was added dropwise and the mixture was stirred for 2 h, warming to room temperature. The mixture was partitioned between water and ethyl acetate. The organic layer was washed with saturated aqueous  $\text{NaHCO}_3$ , dried over  $\text{MgSO}_4$ , filtered and evaporated. The residue was purified using the hexanes/EtOAc as eluent (100: 0 to 90:10) to give 14.69 g (93%) of the title compound as a white solid.

### 5-Iodo-1-tosyl-1*H*-indole

$^1\text{H}$  NMR (400 MHz,  $\text{CDCl}_3$ )  $\delta$  7.87 (d,  $J$  = 1.2 Hz, 1H), 7.76-7.72 (m, 3H), 7.68-7.56 (m, 1H), 7.52 (d,  $J$  = 3.6 Hz, 1H), 7.23 (d,  $J$  = 8.4 Hz, 2H), 6.57 (d,  $J$  = 3.6 Hz, 1H), 2.35 (s, 3H).

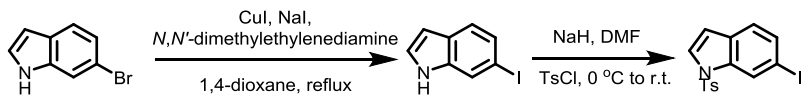

An oven dried, sealable glass tube was charged with a magnetic stirbar, 6-bromoindole (0.98 g, 5.0 mmol), freshly ground sodium iodide (1.52 g, 10.0 mmol), and copper(I) iodide (100 mg, 0.5 mmol). The vessel was then fitted with a rubber septum, evacuated under vacuum and backfilled with argon. This process was repeated three times. The vessel was then charged with 1,4-dioxane (5 mL) followed by *N,N'*-dimethylethylenediamine (0.12 mL, 1.0 mmol) via syringe. The rubber septum was removed and the reaction vessel immediately sealed tightly with a Teflon screw cap and heated to 110 °C for 22 h. After cooling to room temperature, the reaction was diluted with saturated aqueous  $\text{NH}_4\text{Cl}$  (30 mL) and extracted with DCM (4  $\times$  25 mL). The combined organic layers were washed with brine (30 mL) and dried over  $\text{Na}_2\text{SO}_4$ , then concentrated to a brown residue. The residue was triturated in hexanes and concentrated to provide 6-iodo-1*H*-indole as a crude product.<sup>2</sup>

Sodium hydride (60% dispersion in mineral oil, 0.3 g, 7.5 mmol) was suspended in 5 ml DMF and the mixture was cooled in an ice-bath. A solution of 6-iodo-1*H*-indole in 1 ml DMF was added dropwise over 5 min and the mixture was stirred for 30 min. A solution of 4-methylbenzene-1-sulfonyl chloride (1.18 g, 6.0 mmol) in 2 ml DMF was added dropwise and the mixture was stirred for 2 h, warming to room. The mixture was partitioned between water and ethyl acetate. The organic layer was washed with saturated aqueous  $\text{NaHCO}_3$ , dried over  $\text{MgSO}_4$ , filtered and evaporated. The residue was purified using the hexanes/EtOAc as eluent (100/0 to 90/10) to give 1.51 g (76%) of the title compound as a gray solid.

### 6-Iodo-1-tosyl-1*H*-indole

$^1\text{H}$  NMR (400 MHz,  $\text{CDCl}_3$ )  $\delta$  8.36 (s, 1H), 7.76 (d,  $J$  = 8.4 Hz, 2H), 7.52 (dd,  $J$  = 8.4, 1.2 Hz, 1H), 7.48 (d,  $J$  = 3.6 Hz, 1H), 7.28-7.25 (m, 4H), 6.60 (d,  $J$  = 3.6 Hz, 1H), 2.36 (s, 3H).

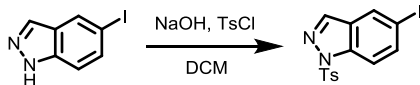

Sodium hydroxide (0.3 g, 6 mmol) was suspended in 10 ml DCM. 5-iodo-1*H*-indazole (448 mg, 2 mmol) was added, and the mixture was stirred for 30 min. A solution of 4-methylbenzene-1-sulfonyl chloride (456 mg, 2.4 mmol) in 2 mL DCM was added dropwise and the mixture was stirred for several hours. The mixture was partitioned with water. The organic layer was washed with saturated aqueous NaHCO<sub>3</sub>, dried over MgSO<sub>4</sub>, filtered and evaporated. The residue was purified via column chromatography on silica gel using the hexanes/EtOAc as eluent (100/0 to 90/10) to give 517 mg (65%) of the title compound as a gray solid.

### 5-Iodo-1-tosyl-1*H*-indazole

<sup>1</sup>H NMR (600 MHz, CDCl<sub>3</sub>) δ 8.09 (d, *J* = 1.2 Hz, 1H), 8.05-8.04 (m, 1H), 8.00-7.99 (m, 1H), 7.86-7.84 (m, 2H), 7.81-7.79 (m, 1H), 7.26-7.25 (m, 2H), 2.37 (s, 3H); <sup>13</sup>C NMR (150 MHz, CDCl<sub>3</sub>) δ 145.72, 139.85, 139.53, 137.64, 134.28, 130.22, 129.95, 128.01, 127.60, 114.90, 87.92, 21.67; HRMS (ESI-TOF) Calcd for C<sub>14</sub>H<sub>12</sub>IN<sub>2</sub>O<sub>2</sub>S [M+H]<sup>+</sup>: 398.9659; found: 398.9663.

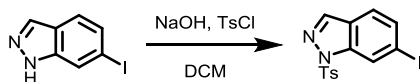

Sodium hydroxide (0.3 g, 6 mmol) was suspended in 10 ml DCM. 5-iodo-1*H*-indazole (448 mg, 2 mmol) was added, and the mixture was stirred for 30 min. A solution of 4-methylbenzene-1-sulfonyl chloride (456 mg, 2.4 mmol) in 2 mL DCM was added dropwise and the mixture was stirred for several hours. The mixture was partitioned with water. The organic layer was washed with saturated aqueous NaHCO<sub>3</sub>, dried over MgSO<sub>4</sub>, filtered and evaporated. The residue was purified via column chromatography on silica gel using the hexanes/EtOAc as eluent (100/0 to 90/10) to give 358 mg (45%) of the title compound as a gray solid.

### 6-Iodo-1-tosyl-1*H*-indazol

<sup>1</sup>H NMR (600 MHz, CDCl<sub>3</sub>) δ 8.64 (d, *J* = 0.6 Hz, 1H), 8.12 (d, *J* = 0.6 Hz, 1H), 7.89-7.87 (m, 2H), 7.64-7.62 (m, 1H), 7.43-7.41 (m, 1H), 7.29-7.27 (m, 2H), 2.38 (s, 3H); <sup>13</sup>C NMR (150 MHz, CDCl<sub>3</sub>) δ 145.73, 141.06, 140.90, 134.34, 133.33, 129.98, 127.68, 125.00, 122.37, 122.18, 95.55, 21.68; HRMS (ESI-TOF) Calcd for C<sub>14</sub>H<sub>12</sub>IN<sub>2</sub>O<sub>2</sub>S [M+H]<sup>+</sup>: 398.9659; found: 398.9662.

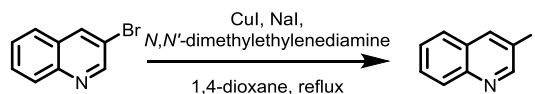

An oven dried, sealable glass tube was charged with a magnetic stirbar, 3-bromoquinoline (1.04 g, 5.0 mmol), freshly ground sodium iodide (1.52 g, 10.0 mmol), and copper(I) iodide (100 mg, 0.5 mmol). The vessel was then fitted with a rubber septum, evacuated under vacuum and backfilled with argon. This process was repeated three times. The vessel was then charged with 1,4-dioxane (5 mL) followed by *N,N'*-dimethylethylenediamine (0.12 mL, 1.0 mmol) via syringe. The rubber septum was removed and the reaction vessel immediately sealed tightly with a Teflon screw cap and heated to 110 °C for 22 hours. After cooling to room temperature, the reaction was diluted with saturated aqueous  $\text{NH}_4\text{Cl}$  (30 mL) and extracted with DCM ( $4 \times 25$  mL). The combined organic layers were washed with brine (30 mL) and dried over  $\text{Na}_2\text{SO}_4$ , then concentrated to a brown residue. The residue was recrystallized in hexanes/EtOAc to provide 3-iodoquinoline (1.15g, 90%).

### 3-Iodoquinoline

$^1\text{H}$  NMR (600 MHz,  $\text{CDCl}_3$ )  $\delta$  9.04 (d,  $J = 1.8$  Hz, 1H), 8.55-8.54 (m, 1H), 8.08-8.06 (m, 1H), 7.75-7.71 (m, 2H), 7.58-7.56 (m, 1H);  $^{13}\text{C}$  NMR (150 MHz,  $\text{CDCl}_3$ )  $\delta$  155.57, 146.34, 143.71, 130.03, 130.01, 129.50, 127.41, 126.79, 89.77; HRMS (ESI-TOF) Calcd for  $\text{C}_9\text{H}_7\text{IN}$   $[\text{M}+\text{H}]^+$ : 255.9618; found: 255.9623.

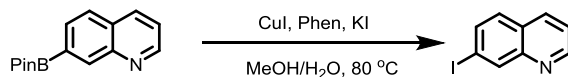

The starting material (638 mg, 2.5 mmol) was dissolved in methanol (20 mL), and the methanol solution was transferred to a 250 mL pressure vessel containing CuI (47.6 mg, 0.25 mmol, 10.0 mol%), phenanthroline (90.0 mg, 0.5 mmol, 20.0 mol%) and KI (0.622 g, 3.76 mmol, 1.50 equiv). The mixture was stirred at room temperature, and water (5 mL) was added. The flask was sealed under air, and the mixture was heated at 80 °C for 1 h, over which time the reaction was monitored by TLC. The reaction was cooled to room temperature, water (25 mL) was added, and the mixture was extracted with  $\text{Et}_2\text{O}$  ( $3 \times 25$  mL). The combined organic phases were washed with brine (25 mL), dried with  $\text{MgSO}_4$ , and concentrated in vacuo. After purification by column



chromatography using hexanes/EtOAc (20/1) as the eluent, the product was obtained as a white solid (593 mg, 93%).<sup>3</sup>

### 7-Iodoquinoline

<sup>1</sup>H NMR (600 MHz, CDCl<sub>3</sub>) δ 8.91 (dd, *J* = 4.2, 1.8 Hz, 1H), 8.55-8.54 (m, 1H), 8.13-8.11 (m, 1H), 7.81 (dd, *J* = 8.4, 1.8 Hz, 1H), 7.54 (d, *J* = 8.4 Hz, 1H), 7.42 (dd, *J* = 8.4, 4.2 Hz, 1H); <sup>13</sup>C NMR (150 MHz, CDCl<sub>3</sub>) δ 151.07, 148.94, 138.53, 135.99, 135.30, 128.90, 127.25, 121.60, 95.47; HRMS (ESI-TOF) Calcd for C<sub>9</sub>H<sub>7</sub>IN [M+H]<sup>+</sup>: 255.9618; found: 255.9621.

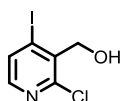

### (2-Chloro-4-iodopyridin-3-yl)methanol

<sup>1</sup>H NMR (600 MHz, CDCl<sub>3</sub>) δ 7.91 (d, *J* = 4.8 Hz, 1H), 7.75 (d, *J* = 5.4 Hz, 1H), 5.00-4.99 (m, 2H), 2.22 (br, 1H); <sup>13</sup>C NMR (150 MHz, CDCl<sub>3</sub>) δ 150.89, 149.05, 136.86, 134.34, 113.30, 66.94; HRMS (ESI-TOF) Calcd for C<sub>6</sub>H<sub>6</sub>ClINO [M+H]<sup>+</sup>: 269.9177; found: 269.9181.

## General Reaction Scheme:

### Monoarylation

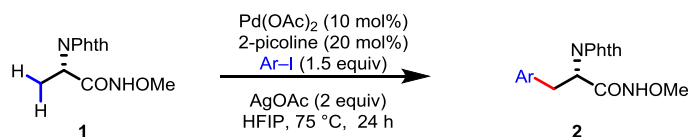

**General procedure for monoarylation with aryl iodides:** The starting material **1** (0.1 mmol, 24.8 mg), Pd(OAc)<sub>2</sub> (10 mol%, 2.2 mg), and AgOAc (0.2 mmol, 33.4 mg) were weighed in air and placed in a sealed tube (10 mL) with a magnetic stir bar. To the reaction mixture, aryl iodide (0.15 mmol), 2-picoline (20 mol%, 2 μL), HFIP (1.0 mL) were added. The reaction mixture was first stirred at room temperature for 10 min and then heated to 75 °C for 24 hours under vigorous

stirring. Upon completion, the reaction mixture was cooled to room temperature, filtered with celite using DCM. The solvents were removed under reduced pressure and the resulting mixture was purified by a silica gel-packed flash chromatography column using DCM/EtOAc (1/0 to 4/1 to 2/1) as the eluent.

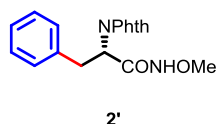

### (S)-2-(1,3-Dioxisoindolin-2-yl)-N-methoxy-3-phenylpropanamide (**2'**)

Substrate **1** was arylated following the general arylation procedure. Analysis of crude reaction mixture by  $^1\text{H}$  NMR showed a > 20:1 ratio of mono- and diarylated products. After purification by column chromatography using DCM/EtOAc (1/0 to 4/1 to 2/1) as the eluent, **2'** was obtained as a white solid (29.8 mg, 90%). (For the NMR data, see the previous one in the substrate preparation section)

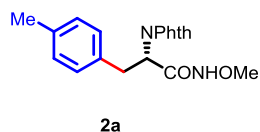

### (S)-2-(1,3-Dioxisoindolin-2-yl)-N-methoxy-3-(p-tolyl)propanamide (**2a**)

Substrate **1** was arylated following the general arylation procedure. Analysis of crude reaction mixture by  $^1\text{H}$  NMR showed a > 20:1 ratio of mono- and diarylated products. After purification by column chromatography using DCM/EtOAc (1/0 to 4/1 to 2/1) as the eluent, **2a** was obtained as a white solid (31.0 mg, 92%).  $^1\text{H}$  NMR (600 MHz,  $\text{CDCl}_3$ )  $\delta$  9.34 (s, 1H), 7.78-7.75 (m, 2H), 7.70-7.68 (m, 2H), 7.03 (d,  $J$  = 7.8 Hz, 2H), 6.97 (d,  $J$  = 7.8 Hz, 2H), 5.06 (m, 1H), 3.74 (s, 3H), 3.47 (m, 2H), 2.21 (s, 3H);  $^{13}\text{C}$  NMR (150 MHz,  $\text{CDCl}_3$ )  $\delta$  167.93, 166.64, 136.63, 134.34, 132.90, 131.31, 129.35, 128.71, 123.57, 64.49, 54.62, 34.34, 20.99; HRMS (ESI-TOF) Calcd for  $\text{C}_{19}\text{H}_{19}\text{N}_2\text{O}_4$   $[\text{M}+\text{H}]^+$ : 339.1339; found: 339.1338. The ee value was determined by HPLC analysis on a Chiralcel OD-H column (20% isopropanol in hexanes, 0.4 mL/min) with  $t_r$  = 42.5 min (minor), 45.6 min (major): 99% ee.

## Area % Report

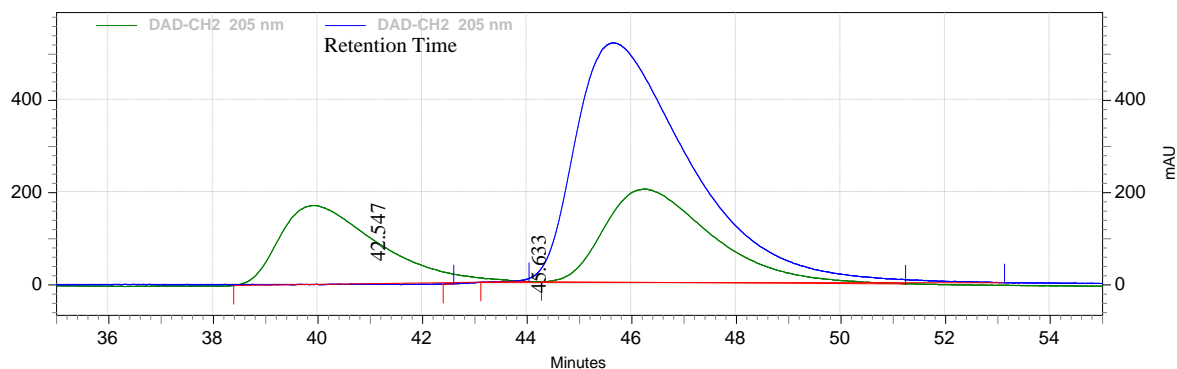

### DAD-CH2 205 nm

#### Results

| Retention Time | Area      | Area % | Height  | Height % |
|----------------|-----------|--------|---------|----------|
| 42.547         | 16983     | 0.01   | 1788    | 0.09     |
| 45.633         | 316582855 | 99.99  | 2077420 | 99.91    |

|        |           |        |         |        |
|--------|-----------|--------|---------|--------|
| Totals | 316599838 | 100.00 | 2079208 | 100.00 |
|--------|-----------|--------|---------|--------|

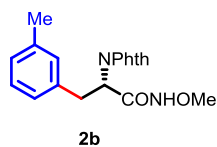

### (*S*)-2-(1,3-Dioxoisindolin-2-yl)-*N*-methoxy-3-(*m*-tolyl)propanamide (**2b**)

Substrate **1** was arylated following the general arylation procedure. Analysis of crude reaction mixture by  $^1\text{H}$  NMR showed a > 20:1 ratio of mono- and diarylated products. After purification by column chromatography using DCM/EtOAc (1/0 to 4/1 to 2/1) as the eluent, **2b** was obtained as a white solid (22.1 mg, 65%).  $^1\text{H}$  NMR (600 MHz,  $\text{CDCl}_3$ )  $\delta$  9.29 (s, 1H), 7.78-7.75 (m, 2H), 7.70-7.67 (m, 2H), 7.05 (t,  $J = 7.5$  Hz, 1H), 6.95-6.92 (m, 3H), 5.06 (m, 1H), 3.74 (s, 3H), 3.52-

3.44 (m, 2H), 2.17 (s, 3H);  $^{13}\text{C}$  NMR (150 MHz,  $\text{CDCl}_3$ )  $\delta$  167.92, 166.59, 138.28, 135.98, 134.36, 131.31, 129.69, 128.53, 127.81, 125.85, 123.56, 64.50, 54.65, 34.70, 21.19; HRMS (ESI-TOF) Calcd for  $\text{C}_{19}\text{H}_{19}\text{N}_2\text{O}_4$   $[\text{M}+\text{H}]^+$ : 339.1339; found: 339.1337.

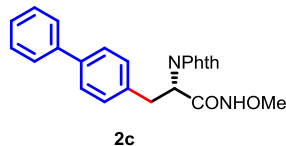

**(S)-3-([1,1'-Biphenyl]-4-yl)-2-(1,3-dioxoisindolin-2-yl)-N-methoxypropanamide (2c)**

Substrate **1** was arylated following the general arylation procedure. Analysis of crude reaction mixture by  $^1\text{H}$  NMR showed a > 20:1 ratio of mono- and diarylated products. After purification by column chromatography using DCM/EtOAc (1/0 to 4/1 to 2/1) as the eluent, **2c** was obtained as a yellow solid (25.4 mg, 64%). m.p. = 107-110  $^\circ\text{C}$ .  $^1\text{H}$  NMR (600 MHz,  $\text{CDCl}_3$ )  $\delta$  9.32 (s, 1H), 7.79-7.76 (m, 2H), 7.70-7.67 (m, 2H), 7.47 (d,  $J$  = 7.2 Hz, 2H), 7.41 (d,  $J$  = 8.4 Hz, 2H), 7.40-7.36 (m, 2H), 7.31-7.28 (m, 1H), 7.23 (d,  $J$  = 7.8 Hz, 2H), 5.13 (m, 1H), 3.76 (s, 3H), 3.57 (m, 2H);  $^{13}\text{C}$  NMR (150 MHz,  $\text{CDCl}_3$ )  $\delta$  167.93, 166.56, 140.44, 139.81, 135.09, 134.41, 131.25, 129.30, 128.68, 127.29, 127.25, 126.87, 123.63, 64.54, 54.46, 34.40; HRMS (ESI-TOF) Calcd for  $\text{C}_{24}\text{H}_{21}\text{N}_2\text{O}_4$   $[\text{M}+\text{H}]^+$ : 401.1496; found 401.1497.

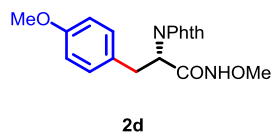

**(S)-2-(1,3-Dioxoisindolin-2-yl)-N-methoxy-3-(4-methoxyphenyl)propanamide (2d)**

Substrate **1** was arylated following the general arylation procedure. Analysis of crude reaction mixture by  $^1\text{H}$  NMR showed a > 20:1 ratio of mono- and diarylated products. After purification by column chromatography using DCM/EtOAc (1/0 to 4/1 to 2/1) as the eluent, **2d** was obtained as a white solid (25.3 mg, 72%).  $^1\text{H}$  NMR (600 MHz,  $\text{CDCl}_3$ )  $\delta$  9.32 (s, 1H), 7.79-7.76 (m, 2H), 7.71-7.68 (m, 2H), 7.06 (d,  $J$  = 8.4 Hz, 2H), 6.70 (d,  $J$  = 8.4 Hz, 2H), 5.05 (m, 1H), 3.75 (s, 3H), 3.69 (s, 3H), 3.45 (m, 2H);  $^{13}\text{C}$  NMR (150MHz,  $\text{CDCl}_3$ )  $\delta$  167.94, 166.67, 158.51, 134.37,

131.27, 129.90, 127.93, 123.60, 114.06, 64.51, 55.15, 54.75, 33.94; HRMS (ESI-TOF) Calcd for  $C_{19}H_{19}N_2O_5$   $[M+H]^+$ : 355.1288; found: 355.1289.

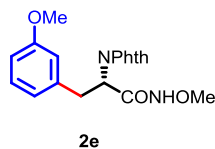

**(S)-2-(1,3-Dioxoisindolin-2-yl)-N-methoxy-3-(3-methoxyphenyl)propanamide (2e)**

Substrate **1** was arylated following the general arylation procedure. Analysis of crude reaction mixture by  $^1H$  NMR showed a > 20:1 ratio of mono- and diarylated products. After purification by column chromatography using DCM/EtOAc (1/0 to 4/1 to 2/1) as the eluent, **2e** was obtained as a white solid (29.3 mg, 83%).  $^1H$  NMR (600 MHz,  $CDCl_3$ )  $\delta$  9.36 (s, 1H), 7.79-7.76 (m, 2H), 7.71-7.68 (m, 2H), 7.07 (t,  $J$  = 7.8 Hz, 1H), 6.73 (d,  $J$  = 7.8 Hz, 1H), 6.69 (s, 1H), 6.67-6.65 (m, 1H), 5.10 (m, 1H), 3.75 (s, 3H), 3.66 (s, 3H), 3.55-3.41 (m, 2H);  $^{13}C$  NMR (150 MHz,  $CDCl_3$ )  $\delta$  167.89, 166.52, 159.66, 137.61, 134.38, 131.29, 129.66, 123.58, 121.18, 114.07, 113.02, 64.50, 55.08, 54.43, 34.75; HRMS (ESI-TOF) Calcd for  $C_{19}H_{19}N_2O_5$   $[M+H]^+$ : 355.1288; found: 355.1291.

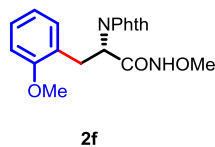

**(S)-2-(1,3-dioxoisindolin-2-yl)-N-methoxy-3-(2-methoxyphenyl)propanamide (2f)**

Substrate **1** was arylated following the general arylation procedure. Analysis of crude reaction mixture by  $^1H$  NMR showed a > 20:1 ratio of mono- and diarylated products. After purification by column chromatography using DCM/EtOAc (1/0 to 4/1 to 2/1) as the eluent, **2f** was obtained as a white solid (27.0 mg, 76%).  $^1H$  NMR (600 MHz,  $CDCl_3$ )  $\delta$  9.23 (s, 1H), 7.77-7.75 (m, 2H), 7.70-7.67 (m, 2H), 7.14-7.13 (m, 1H), 7.03 (dd,  $J$  = 7.2, 1.8 Hz, 1H), 6.76-6.74 (m, 1H), 6.73-6.70 (m, 1H), 5.26 (m, 1H), 3.76 (s, 3H), 3.74 (s, 3H), 3.54-3.40 (m, 2H);  $^{13}C$  NMR (150 MHz,  $CDCl_3$ )  $\delta$  167.83, 166.89, 157.47, 134.18, 131.47, 131.01, 128.62, 124.44, 123.42, 120.54,

110.28, 64.49, 55.18, 52.75, 30.40; HRMS (ESI-TOF) Calcd for C<sub>19</sub>H<sub>19</sub>N<sub>2</sub>O<sub>5</sub> [M+H]<sup>+</sup>: 355.1288; found: 355.1291.

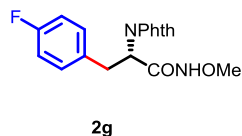

**(S)-2-(1,3-Dioxoisindolin-2-yl)-3-(4-fluorophenyl)-N-methoxypropanamide (2g)**

Substrate **1** was arylated following the general arylation procedure. Analysis of crude reaction mixture by <sup>1</sup>H NMR showed a > 20:1 ratio of mono- and diarylated products. After purification by column chromatography using DCM/EtOAc (1/0 to 4/1 to 2/1) as the eluent, **2g** was obtained as a white solid (27.8 mg, 81%). m.p. = 135-137 °C. <sup>1</sup>H NMR (600 MHz, CDCl<sub>3</sub>) δ 9.44 (s, 1H), 7.80-7.76 (m, 2H), 7.72-7.68 (m, 2H), 7.12-7.10 (m, 2H), 6.85 (t, *J* = 8.4 Hz, 2H), 5.04 (m, 1H), 3.74 (s, 3H), 3.56-3.40 (m, 2H); <sup>13</sup>C NMR (150 MHz, CDCl<sub>3</sub>) δ 167.84, 166.40, 161.80 (d, *J*<sub>FC</sub> = 243.9 Hz), 134.47, 131.80, 131.17, 130.43 (d, *J*<sub>FC</sub> = 8.0 Hz), 123.63, 115.52 (d, *J*<sub>FC</sub> = 21.3 Hz), 64.50, 54.39, 33.88; HRMS (ESI-TOF) Calcd for C<sub>18</sub>H<sub>16</sub>FN<sub>2</sub>O<sub>4</sub> [M+H]<sup>+</sup>: 343.1089; found: 343.1086.

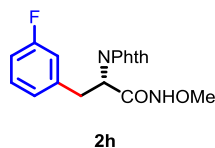

**(S)-2-(1,3-dioxoisindolin-2-yl)-3-(3-fluorophenyl)-N-methoxypropanamide (2h)**

Substrate **1** was arylated following the general arylation procedure. Analysis of crude reaction mixture by <sup>1</sup>H NMR showed a > 20:1 ratio of mono- and diarylated products. After purification by column chromatography using DCM/EtOAc (1/0 to 4/1 to 2/1) as the eluent, **2h** was obtained as a white solid (24.3 mg, 71%). m.p. = 125-127 °C. <sup>1</sup>H NMR (600 MHz, CDCl<sub>3</sub>) δ 9.47 (s, 1H), 7.78-7.77 (m, 2H), 7.71-7.70 (m, 2H), 7.15-7.12 (m, 1H), 6.94 (d, *J* = 7.8 Hz, 1H), 6.87 (d, *J* = 10.2 Hz, 1H), 6.82 (t, *J* = 8.4 Hz, 1H), 5.05 (m, 1H), 3.74 (s, 3H), 3.52 (m, 2H); <sup>13</sup>C NMR (150 MHz, CDCl<sub>3</sub>) δ 167.80, 166.25, 162.72 (d, *J*<sub>FC</sub> = 245.1 Hz), 138.69, 134.47, 131.19, 130.14 (d,

$J_{\text{FC}} = 8.4$  Hz), 124.57 (d,  $J_{\text{FC}} = 2.9$  Hz), 123.64, 115.89 (d,  $J_{\text{FC}} = 20.7$  Hz), 114.04 (d,  $J_{\text{FC}} = 20.9$  Hz), 64.48, 54.03, 34.34; HRMS (ESI-TOF) Calcd for  $\text{C}_{18}\text{H}_{16}\text{FN}_2\text{O}_4$   $[\text{M}+\text{H}]^+$ : 343.1089; found: 343.1087.

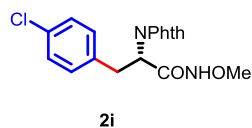

**(S)-3-(4-Chlorophenyl)-2-(1,3-dioxoisindolin-2-yl)-N-methoxypropanamide (2i)**

Substrate **1** was arylated following the general arylation procedure. Analysis of crude reaction mixture by  $^1\text{H}$  NMR showed a  $> 20:1$  ratio of mono- and diarylated products. After purification by column chromatography using DCM/EtOAc (1/0 to 4/1 to 2/1) as the eluent, **2i** was obtained as a white solid (22.6 mg, 63%).  $^1\text{H}$  NMR (600 MHz,  $\text{CDCl}_3$ )  $\delta$  9.33 (s, 1H), 7.80-7.77 (m, 2H), 7.73-7.70 (m, 2H), 7.14 (d,  $J = 8.4$  Hz, 2H), 7.09 (d,  $J = 8.4$  Hz, 2H), 5.04 (m, 1H), 3.75 (s, 3H), 3.49 (m, 2H);  $^{13}\text{C}$  NMR (150 MHz,  $\text{CDCl}_3$ )  $\delta$  167.82, 166.33, 134.53, 132.92, 131.14, 130.24, 128.81, 123.70, 64.55, 54.19, 34.00; HRMS (ESI-TOF) Calcd for  $\text{C}_{18}\text{H}_{16}\text{ClN}_2\text{O}_4$   $[\text{M}+\text{H}]^+$ : 359.0793; found: 359.0791.

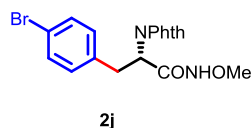

**(S)-3-(4-Bromophenyl)-2-(1,3-dioxoisindolin-2-yl)-N-methoxypropanamide (2j)**

Substrate **1** was arylated following the general arylation procedure. Analysis of crude reaction mixture by  $^1\text{H}$  NMR showed a  $> 20:1$  ratio of mono- and diarylated products. After purification by column chromatography using DCM/EtOAc (1/0 to 4/1 to 2/1) as the eluent, **2j** was obtained as a white solid (28.6 mg, 71%).  $^1\text{H}$  NMR (600 MHz,  $\text{CDCl}_3$ )  $\delta$  9.27 (s, 1H), 7.80-7.77 (m, 2H), 7.73-7.70 (m, 2H), 7.30 (d,  $J = 8.4$  Hz, 2H), 7.03 (d,  $J = 7.2$  Hz, 2H), 5.06 (m, 1H), 3.75 (s, 3H), 3.48 (m, 2H);  $^{13}\text{C}$  NMR (150 MHz,  $\text{CDCl}_3$ )  $\delta$  167.82, 166.31, 135.06, 134.55, 131.77, 131.12, 130.60, 123.72, 121.05, 64.57, 54.15, 34.08; HRMS (ESI-TOF) Calcd for  $\text{C}_{18}\text{H}_{16}\text{BrN}_2\text{O}_4$   $[\text{M}+\text{H}]^+$ : 403.0288; found: 403.0284.

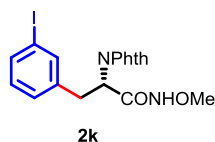

**(S)-2-(1,3-dioxoisindolin-2-yl)-3-(3-iodophenyl)-N-methoxypropanamide (2k)**

Substrate **1** was arylated following the general arylation procedure. Analysis of crude reaction mixture by  $^1\text{H}$  NMR showed a > 20:1 ratio of mono- and diarylated products. After purification by column chromatography using DCM/EtOAc (1/0 to 4/1 to 2/1) as the eluent, **2k** was obtained as a white solid (22.1 mg, 49%).  $^1\text{H}$  NMR (600 MHz,  $\text{CDCl}_3$ )  $\delta$  9.27 (s, 1H), 7.82-7.79 (m, 2H), 7.74-7.72 (m, 2H), 7.47-7.45 (m, 2H), 7.14 (d,  $J = 7.2$  Hz, 1H), 6.93 (t,  $J = 7.8$  Hz, 1H), 5.01 (m, 1H), 3.75 (s, 3H), 3.47-3.45 (m, 2H);  $^{13}\text{C}$  NMR (150 MHz,  $\text{CDCl}_3$ )  $\delta$  167.82, 166.14, 138.53, 137.98, 136.18, 134.55, 131.15, 130.36, 128.16, 123.73, 94.39, 64.58, 54.25, 34.23; HRMS (ESI-TOF) Calcd for  $\text{C}_{18}\text{H}_{16}\text{IN}_2\text{O}_4$   $[\text{M}+\text{H}]^+$ : 451.0149; found: 451.0143.

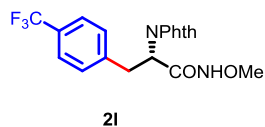

**(S)-2-(1,3-Dioxoisindolin-2-yl)-N-methoxy-3-(4-(trifluoromethyl)phenyl)propanamide (2l)**

Substrate **1** was arylated following the general arylation procedure. Analysis of crude reaction mixture by  $^1\text{H}$  NMR showed a > 20:1 ratio of mono- and diarylated products. After purification by column chromatography using DCM/EtOAc (1/0 to 4/1 to 2/1) as the eluent, **2l** was obtained as a white solid (28.0 mg, 71%). m.p. = 137-139 °C.  $^1\text{H}$  NMR (600 MHz,  $\text{CDCl}_3$ )  $\delta$  9.43 (s, 1H), 7.79-7.76 (m, 2H), 7.73-7.70 (m, 2H), 7.43 (d,  $J = 7.8$  Hz, 2H), 7.28 (d,  $J = 7.2$  Hz, 2H), 5.10 (m, 1H), 3.75 (s, 3H), 3.59 (m, 2H);  $^{13}\text{C}$  NMR (150 MHz,  $\text{CDCl}_3$ )  $\delta$  167.78, 166.16, 140.33, 134.57, 131.12, 129.67-129.03, 125.57 (q,  $J_{\text{FC}} = 3.5$  Hz) 123.98 (q,  $J_{\text{FC}} = 270.4$  Hz), 123.70, 64.53, 53.84, 34.41; HRMS (ESI-TOF) Calcd for  $\text{C}_{19}\text{H}_{16}\text{F}_3\text{N}_2\text{O}_4$   $[\text{M}+\text{H}]^+$ : 393.1057; found 393.1060.

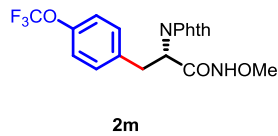



**(S)-2-(1,3-Dioxoisindolin-2-yl)-N-methoxy-3-(4-(trifluoromethoxy)phenyl)propanamide (2m)**

Substrate **1** was arylated following the general arylation procedure. Analysis of crude reaction mixture by  $^1\text{H}$  NMR showed a > 20:1 ratio of mono- and diarylated products. After purification by column chromatography using DCM/EtOAc (1/0 to 4/1 to 2/1) as the eluent, **2m** was obtained as a white solid (33.6 mg, 82%).  $^1\text{H}$  NMR (600 MHz,  $\text{CDCl}_3$ )  $\delta$  9.41 (s, 1H), 7.79-7.76 (m, 2H), 7.72-7.69 (m, 2H), 7.18 (d,  $J = 7.8$  Hz, 2H), 7.02 (d,  $J = 7.8$  Hz, 2H), 5.07 (m, 1H), 3.74 (s, 3H), 3.53 (m, 2H);  $^{13}\text{C}$  NMR (150 MHz,  $\text{CDCl}_3$ )  $\delta$  167.83, 166.34, 148.19, 134.88, 134.53, 131.15, 130.34, 123.65, 121.11, 120.32 (q,  $J_{\text{FC}} = 255.5$  Hz), 64.51, 54.14, 33.99; HRMS (ESI-TOF) Calcd for  $\text{C}_{19}\text{H}_{16}\text{F}_3\text{N}_2\text{O}_5$   $[\text{M}+\text{H}]^+$ : 409.1006; found: 409.1013.

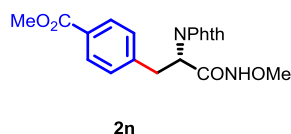

**Methyl (S)-4-(2-(1,3-dioxoisindolin-2-yl)-3-(methoxyamino)-3-oxopropyl)benzoate (2n)**

Substrate **1** was arylated following the general arylation procedure. Analysis of crude reaction mixture by  $^1\text{H}$  NMR showed a > 20:1 ratio of mono- and diarylated products. After purification by column chromatography using DCM/EtOAc (1/0 to 4/1 to 2/1) as the eluent, **2n** was obtained as a white solid (31.3 mg, 82%).  $^1\text{H}$  NMR (600 MHz,  $\text{CDCl}_3$ )  $\delta$  9.49 (s, 1H), 7.82 (d,  $J = 8.4$  Hz, 2H), 7.76-7.63 (m, 2H), 7.70-7.66 (m, 2H), 7.22 (d,  $J = 7.8$  Hz, 2H), 5.10 (m, 1H), 3.83 (s, 3H), 3.58 (m, 2H);  $^{13}\text{C}$  NMR (150 MHz,  $\text{CDCl}_3$ )  $\delta$  167.72, 166.82, 166.18, 141.64, 134.48, 131.12, 129.91, 128.97, 128.89, 123.65, 64.50, 53.83, 52.07, 34.56; HRMS (ESI-TOF) Calcd for  $\text{C}_{20}\text{H}_{19}\text{N}_2\text{O}_6$   $[\text{M}+\text{H}]^+$ : 383.1238; found: 383.1238.

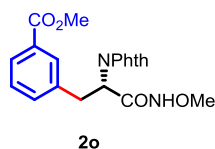

**methyl (S)-3-(2-(1,3-dioxoisindolin-2-yl)-3-(methoxyamino)-3-oxopropyl)benzoate (2o)**

Substrate **1** was arylated following the general arylation procedure. Analysis of crude reaction mixture by  $^1\text{H}$  NMR showed a > 20:1 ratio of mono- and diarylated products. After purification by column chromatography using DCM/EtOAc (1/0 to 4/1 to 2/1) as the eluent, **2o** was obtained as a white solid (30.9 mg, 81%).  $^1\text{H}$  NMR (600 MHz,  $\text{CDCl}_3$ )  $\delta$  9.40 (s, 1H), 7.82-7.79 (m, 2H), 7.78-7.76 (m, 2H), 7.71-7.69 (m, 2H), 7.37 (d,  $J$  = 7.2 Hz, 1H), 7.26-7.25 (m, 1H), 5.10 (m, 1H), 3.82 (s, 3H), 3.76 (s, 3H), 3.59-3.57 (m, 2H);  $^{13}\text{C}$  NMR (150 MHz,  $\text{CDCl}_3$ )  $\delta$  167.78, 166.72, 166.14, 136.64, 134.44, 133.50, 131.21, 130.44, 130.06, 128.76, 128.37, 123.65, 64.51, 54.27, 52.10, 34.42; HRMS (ESI-TOF) Calcd for  $\text{C}_{20}\text{H}_{19}\text{N}_2\text{O}_6$   $[\text{M}+\text{H}]^+$ : 383.1238; found: 383.1240.

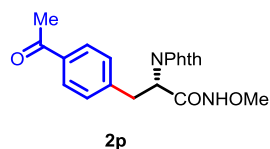

**(S)-3-(4-Acetylphenyl)-2-(1,3-dioxoisindolin-2-yl)-N-methoxypropanamide (2p)**

Substrate **1** was arylated following the general arylation procedure. Analysis of crude reaction mixture by  $^1\text{H}$  NMR showed a > 20:1 ratio of mono- and diarylated products. After purification by column chromatography using DCM/EtOAc (1/0 to 4/1 to 2/1) as the eluent, **2p** was obtained as a white solid (26.3 mg, 72%).  $^1\text{H}$  NMR (600 MHz,  $\text{CDCl}_3$ )  $\delta$  9.55 (s, 1H), 7.76-7.74 (m, 4H), 7.71-7.68 (m, 2H), 7.25 (d,  $J$  = 7.8 Hz, 2H), 5.11 (m, 1H), 3.75 (s, 4H), 3.59 (m, 2H), 2.49 (s, 3H);  $^{13}\text{C}$  NMR (150 MHz,  $\text{CDCl}_3$ )  $\delta$  197.90, 167.72, 166.11, 141.94, 135.84, 134.51, 131.14, 129.17, 128.70, 123.67, 64.49, 53.80, 34.54, 26.52; HRMS (ESI-TOF) Calcd for  $\text{C}_{20}\text{H}_{19}\text{N}_2\text{O}_5$   $[\text{M}+\text{H}]^+$ : 367.1288; found: 367.1286.

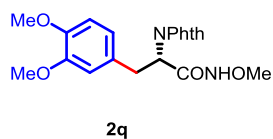

**(S)-3-(2,3-Dimethoxyphenyl)-2-(1,3-dioxoisindolin-2-yl)-N-methoxypropanamide (2q)**

Substrate **1** was arylated following the general arylation procedure. Analysis of crude reaction mixture by  $^1\text{H}$  NMR showed a > 20:1 ratio of mono- and diarylated products. After purification by column chromatography using DCM/EtOAc (1/0 to 4/1 to 2/1) as the eluent, **2q** was obtained

as a white solid (22.8 mg, 60%).  $^1\text{H}$  NMR (600 MHz,  $\text{CDCl}_3$ )  $\delta$  9.27 (s, 1H), 7.79-7.76 (m, 2H), 7.71-7.69 (m, 2H), 6.68-6.63 (m, 3H), 5.08 (m, 1H), 3.76 (s, 6H), 3.70 (s, 3H), 3.47-3.44 (m, 2H).  $^{13}\text{C}$  NMR (150 MHz,  $\text{CDCl}_3$ )  $\delta$  167.95, 166.70, 148.79, 147.89, 134.45, 131.24, 128.33, 123.59, 121.06, 111.68, 111.19, 64.56, 55.72, 55.66, 54.75, 34.37; HRMS (ESI-TOF) Calcd for  $\text{C}_{20}\text{H}_{21}\text{N}_2\text{O}_6$   $[\text{M}+\text{H}]^+$ : 385.1394; found: 385.140

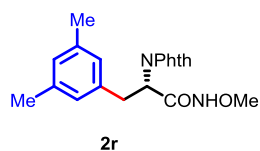

**(S)-3-(3,5-Dimethylphenyl)-2-(1,3-dioxoisindolin-2-yl)-N-methoxypropanamide (2r)**

Substrate **1** was arylated following the general arylation procedure. Analysis of crude reaction mixture by  $^1\text{H}$  NMR showed a > 20:1 ratio of mono- and diarylated products. After purification by column chromatography using DCM/EtOAc (1/0 to 4/1 to 2/1) as the eluent, **2r** was obtained as a white solid (36.4 mg, 75%).  $^1\text{H}$  NMR (600 MHz,  $\text{CDCl}_3$ )  $\delta$  9.26 (s, 1H), 7.80-7.77 (m, 2H), 7.71-7.69 (m, 2H), 6.75 (s, 3H), 5.04 (m, 1H), 3.74 (s, 3H), 3.46-3.36 (m, 2H), 2.13 (s, 6H);  $^{13}\text{C}$  NMR (150 MHz,  $\text{CDCl}_3$ )  $\delta$  167.95, 166.60, 138.15, 135.92, 134.32, 131.38, 128.68, 126.70, 123.52, 64.48, 54.70, 34.66, 21.04; HRMS (ESI-TOF) Calcd for  $\text{C}_{20}\text{H}_{21}\text{N}_2\text{O}_4$   $[\text{M}+\text{H}]^+$ : 353.1496; found: 353.1498.

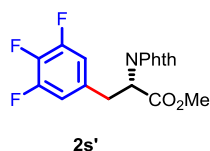

**Methyl (S)-2-(1,3-dioxoisindolin-2-yl)-3-(3,4,5-trifluorophenyl)propanoate (2s')**

Substrate **1** was arylated following the general arylation procedure. Analysis of crude reaction mixture by  $^1\text{H}$  NMR showed a > 20:1 ratio of mono- and diarylated products. The solvents were removed under reduced pressure and the resulting mixture was added  $\text{PhI}(\text{OAc})_2$  (0.1 mmol, 32.2 mg) and MeOH (1 mL) in a sealed tube (10 mL) with a magnetic stir bar, the reaction mixture was heated to 80 °C for 3 hours. Upon completion, the reaction mixture was cooled to room

temperature, filtered with celite using DCM. The solvents were removed under reduced pressure and the resulting mixture was purified by a silica gel-packed flash chromatography column using hexanes/EtOAc (5/1 to 4/1 to 2/1) as the eluent. **2s'** was obtained as a white solid (22.5 mg, 62%). <sup>1</sup>H NMR (600 MHz, CDCl<sub>3</sub>) δ 7.85-7.82 (m, 2H), 7.76-7.73 (m, 2H), 6.83-6.78 (m, 2H), 5.09-5.07 (m, 1H), 3.78 (s, 3H), 3.56-3.46 (m, 2H); <sup>13</sup>C NMR (150 MHz, CDCl<sub>3</sub>) δ 168.67, 167.39, 151.06 (ddd, *J*<sub>FC</sub> = 248.8 Hz, 9.8 Hz, 4.0 Hz), 138.76 (dt, *J*<sub>FC</sub> = 249.0 Hz, 15.1 Hz), 134.43, 133.11-132.98, 131.39, 123.73, 112.96 (dd, *J*<sub>FC</sub> = 16.4 Hz, 4.4 Hz), 53.12, 52.59, 34.16; HRMS (ESI-TOF) Calcd for C<sub>18</sub>H<sub>13</sub>F<sub>3</sub>NO<sub>4</sub> [M+H]<sup>+</sup>: 364.0791; found: 364.0794.

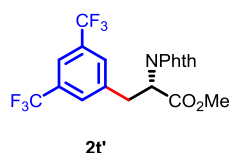

### Methyl (*S*)-3-(3,5-bis(trifluoromethyl)phenyl)-2-(1,3-dioxoisindolin-2-yl)propanoate (**2t'**)

Substrate **1** was arylated following the general arylation procedure. Analysis of crude reaction mixture by <sup>1</sup>H NMR showed a > 20:1 ratio of mono- and diarylated products. The solvents were removed under reduced pressure and the resulting mixture was added PhI(OAc)<sub>2</sub> (0.1 mmol, 32.2 mg) and MeOH (1 mL) in a sealed tube (10 mL) with a magnetic stir bar. The reaction mixture was heated to 80 °C for 3 hours. Upon completion, the reaction mixture was cooled to room temperature, filtered with celite using DCM. The solvents were removed under reduced pressure and the resulting mixture was purified by a silica gel-packed flash chromatography column using Hexanes/EtOAc (5/1 to 4/1 to 2/1) as the eluent. **2t'** was obtained as a white solid (23.6 mg, 53%). <sup>1</sup>H NMR (600 MHz, CDCl<sub>3</sub>) δ 7.83-7.80 (m, 2H), 7.75-7.72 (m, 2H), 7.68 (s, 1H), 7.63 (s, 2H), 5.15 (dd, *J* = 10.8, 5.4 Hz, 1H), 3.80 (s, 3H), 3.73 (dd, *J* = 14.4, 5.4 Hz, 1H), 3.64 (dd, *J* = 14.4, 10.6 Hz, 1H); <sup>13</sup>C NMR (150 MHz, CDCl<sub>3</sub>) δ 168.57, 167.31, 139.40, 134.48, 131.83 (q, *J*<sub>FC</sub> = 33.2 Hz), 131.31, 129.24 (q, *J*<sub>FC</sub> = 4.3 Hz), 123.69, 123.26 (q, *J*<sub>FC</sub> = 271.2 Hz), 121.14-120.97, 53.17, 52.42, 34.56; HRMS (ESI-TOF) Calcd for C<sub>20</sub>H<sub>14</sub>F<sub>6</sub>NO<sub>4</sub> [M+H]<sup>+</sup>: 446.0822; found: 446.0820.

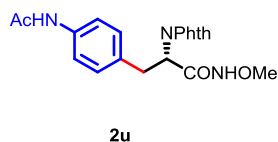

**(S)-3-(4-Acetamidophenyl)-2-(1,3-dioxoisindolin-2-yl)-N-methoxypropanamide (2u)**

Substrate **1** was arylated following the general arylation procedure. Analysis of crude reaction mixture by  $^1\text{H}$  NMR showed a > 20:1 ratio of mono- and diarylated products. After purification by column chromatography using DCM/EtOAc (4/1 to 2/1 to 0/1) as the eluent, **2u** was obtained as a white solid (20.2 mg, 53%).  $^1\text{H}$  NMR (600 MHz, MeOD)  $\delta$  7.82-7.79 (m, 4H), 7.35 (d,  $J$  = 8.4 Hz, 2H), 7.09 (d,  $J$  = 7.8 Hz, 2H), 5.08 (dd,  $J$  = 11.4, 5.4 Hz, 1H), 4.63 (br, 1H), 3.72 (s, 3H), 3.52-3.43 (m, 2H), 2.07 (s, 3H);  $^{13}\text{C}$  NMR (150 MHz, MeOD)  $\delta$  171.60, 169.10, 168.09, 138.78, 135.68, 133.73, 132.97, 130.51, 124.36, 121.13, 64.47, 54.31, 34.62, 23.83; HRMS (ESI-TOF) Calcd for  $\text{C}_{20}\text{H}_{20}\text{N}_3\text{O}_5$   $[\text{M}+\text{H}]^+$ : 382.1397; found: 382.1401.

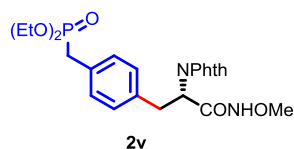

**Diethyl (S)-4-(2-(1,3-dioxoisindolin-2-yl)-3-(methoxyamino)-3-oxopropyl)benzyl phosphonate (2v)**

Substrate **1** was arylated following the general arylation procedure. Analysis of crude reaction mixture by  $^1\text{H}$  NMR showed a > 20:1 ratio of mono- and diarylated products. After purification by column chromatography using DCM/EtOAc (4/1 to 2/1 to 0/1) as the eluent, **2v** was obtained as a white solid (44.4 mg, 94%).  $^1\text{H}$  NMR (600 MHz,  $\text{CDCl}_3$ )  $\delta$  10.20 (s, 1H), 7.76-7.73 (m, 2H), 7.69-7.67 (m, 2H), 7.07 (m, 4H), 5.05 (m, 1H), 3.89-3.82 (m, 4H), 3.72 (s, 3H), 3.57-3.45 (m, 2H), 3.05-2.89 (m, 2H), 1.15-1.12 (m, 6H);  $^{13}\text{C}$  NMR (150 MHz,  $\text{CDCl}_3$ )  $\delta$  167.79, 166.27, 135.26, 134.17, 131.48, 129.99, 129.95, 129.10, 123.42, 64.20, 62.21-62.11, 54.09, 34.20, 33.16 (d,  $J_{\text{PC}}$  = 137.4 Hz), 16.28-16.23; HRMS (ESI-TOF) Calcd for  $\text{C}_{23}\text{H}_{28}\text{N}_2\text{O}_7\text{P}$   $[\text{M}+\text{H}]^+$ : 475.1629; found: 475.1630.

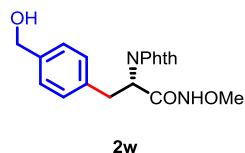

**(S)-2-(1,3-Dioxoisindolin-2-yl)-3-(4-(hydroxymethyl)phenyl)-N-methoxypropanamide (2w)**

Substrate **1** was arylated following the general arylation procedure. Analysis of crude reaction mixture by  $^1\text{H}$  NMR showed a > 20:1 ratio of mono- and diarylated products. After purification by column chromatography using DCM/EtOAc (1/0 to 4/1 to 2/1) as the eluent, **2w** was obtained as a white solid (22.1 mg, 62%).  $^1\text{H}$  NMR (600 MHz,  $\text{CDCl}_3$ )  $\delta$  9.41 (s, 1H), 7.78-7.75 (m, 2H), 7.71-7.68 (m, 2H), 7.17-7.12 (m, 4H), 5.05 (m, 1H), 4.55 (s, 2H), 3.73 (s, 3H), 3.53-3.43 (m, 2H), 2.02-1.78 (br, 1H);  $^{13}\text{C}$  NMR (150 MHz,  $\text{CDCl}_3$ )  $\delta$  167.90, 166.51, 139.68, 135.44, 134.43, 131.23, 129.03, 127.28, 123.63, 64.82, 64.48, 54.44, 34.40; HRMS (ESI-TOF) Calcd for  $\text{C}_{19}\text{H}_{19}\text{N}_2\text{O}_5$   $[\text{M}+\text{H}]^+$ : 355.1288; found: 355.1288.

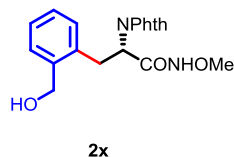

**(S)-2-(1,3-Dioxoisindolin-2-yl)-3-(2-(hydroxymethyl)phenyl)-N-methoxypropanamide (2x)**

Substrate **1** was arylated following the general arylation procedure. Analysis of crude reaction mixture by  $^1\text{H}$  NMR showed a > 20:1 ratio of mono- and diarylated products. After purification by column chromatography using DCM/EtOAc (1/0 to 4/1 to 2/1) as the eluent, **2x** was obtained as a white solid (15.0 mg, 42%). m.p. = 122-124 °C.  $^1\text{H}$  NMR (600 MHz,  $\text{CDCl}_3$ )  $\delta$  9.71 (s, 1H), 7.79-7.76 (dm, 2H), 7.71-7.68 (m, 2H), 7.30 (d,  $J$  = 7.5 Hz, 1H), 7.15-7.14 (m, 1H), 7.07-7.06 (m, 2H), 5.22 (m, 1H), 4.84 (d,  $J$  = 12.6 Hz, 1H), 4.69 (d,  $J$  = 12.0 Hz, 1H), 3.69 (s, 3H), 3.69-3.64 (m, 1H), 3.53 (dd,  $J$  = 14.4, 10.0 Hz, 1H), 1.85 (br, 1H);  $^{13}\text{C}$  NMR (150 MHz,  $\text{CDCl}_3$ )  $\delta$  168.04, 166.45, 138.58, 135.53, 134.33, 131.38, 130.09, 129.95, 128.34, 127.48, 123.58, 64.37, 63.67, 53.67, 31.85; HRMS (ESI-TOF) Calcd for  $\text{C}_{19}\text{H}_{19}\text{N}_2\text{O}_5$   $[\text{M}+\text{H}]^+$ : 355.1288; found: 355.1287.

### Removal of the directing group:

Method A:  $\text{PhI}(\text{OAc})_2$

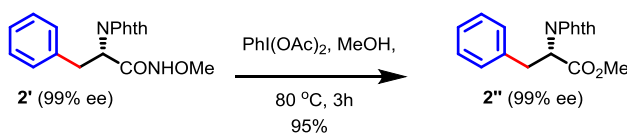

### Methyl (S)-2-(1,3-dioxoisindolin-2-yl)-3-phenylpropanoate (**2''**)

The substrate **2'** (0.1 mmol, 32.8 mg) was dissolved in MeOH (1 mL), followed by the addition of  $\text{PhI}(\text{OAc})_2$  (0.1 mmol, 32.2 mg). The reaction mixture was heated to 80 °C for 3 hours. The reaction mixture was then cooled to room temperature and then saturated aq.  $\text{Na}_2\text{SO}_3$  and saturated aq.  $\text{NaHCO}_3$  were added. The aqueous layer was then extracted with EtOAc and the combined organic layers washed with brine, dried over  $\text{MgSO}_4$ , filtered and concentrated. Purify by column chromatography (hexanes/ EtOAc = 2:1 to 1:1) to provide product **2''**, (29.4 mg, 95%).  $^1\text{H}$  NMR (600 MHz,  $\text{CDCl}_3$ )  $\delta$  7.79-7.77 (m, 2H), 7.70-7.68 (m, 2H), 7.19-7.13 (m, 5H), 5.16 (dd,  $J$  = 11.4, 5.4 Hz, 1H), 3.78 (s, 3H), 3.61-3.52 (m, 2H). The ee value was determined by HPLC analysis on a Chiralcel OJ column (25% isopropanol in hexanes, 0.4 mL/min) with  $t_r$  = 42.7 min (major), 63.0 min (minor): 99% ee.

### Area % Report

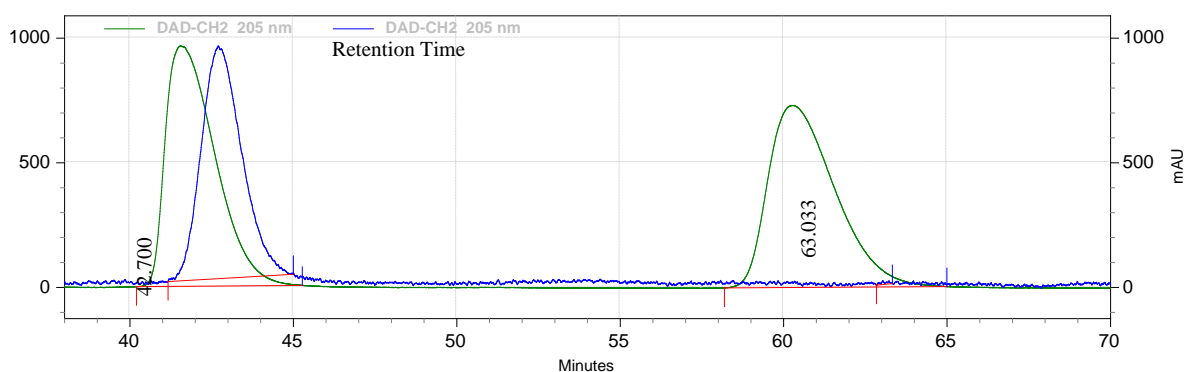

#### DAD-CH2 205 nm

##### Results

| Retention Time | Area     | Area % | Height | Height % |
|----------------|----------|--------|--------|----------|
| 42.700         | 18924298 | 99.77  | 218886 | 98.38    |
| 63.033         | 43990    | 0.23   | 3603   | 1.62     |

|        |          |        |        |        |
|--------|----------|--------|--------|--------|
| Totals | 18968288 | 100.00 | 222489 | 100.00 |
|--------|----------|--------|--------|--------|

Method B: Et<sub>2</sub>O • BF<sub>3</sub>

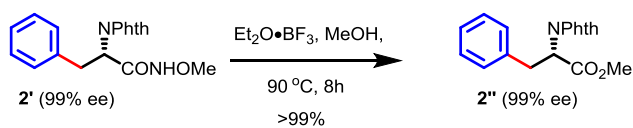

A sealable pressure flask was charged with MeOH (1 mL) and amide **2'** (0.1 mmol, 32.8 mg). BF<sub>3</sub>•OEt<sub>2</sub> (5 equiv.) was added and the reaction vessel sealed. The reaction mixture was heated to 90 °C for 8 hours under vigorous stirring. Upon completion, the reaction mixture was cooled to room temperature. The solvents were removed under reduced pressure and H<sub>2</sub>O and EtOAc were added, organic layers were removed and the aqueous layer was then extracted with EtOAc



and the combined organics washed with brine, dried over MgSO<sub>4</sub>, filtered and concentrated. Purify by column chromatography (hexanes/ EtOAc = 2:1 to 1:1) to provide **2''** white solid (30.9 mg, >99%). The ee value was determined by HPLC analysis on a Chiralcel OJ column (25% isopropanol in hexanes, 0.4 mL/min) with t<sub>r</sub> = 42.6 min (major), 60.7 min (minor): 99% ee.

#### Area % Report

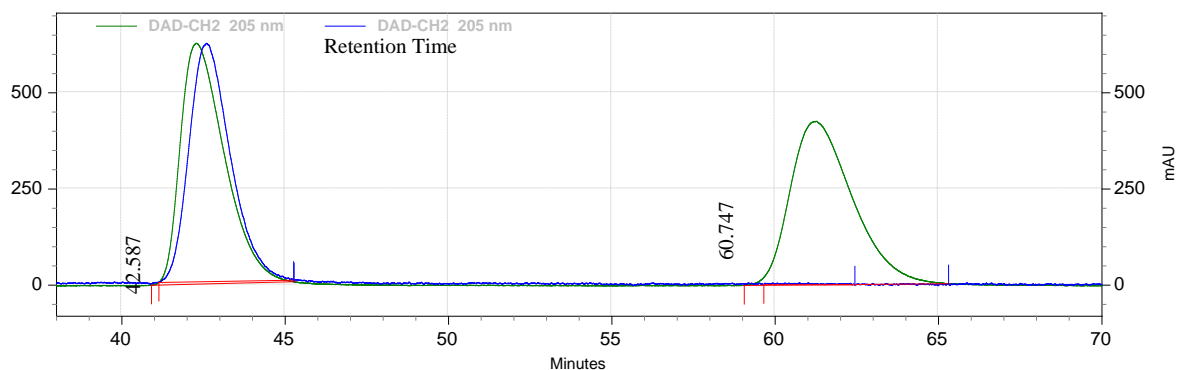

#### DAD-CH2 205 nm Results

| Retention Time | Area     | Area % | Height | Height % |
|----------------|----------|--------|--------|----------|
| 42.587         | 50142197 | 99.32  | 568129 | 99.24    |
| 60.747         | 344863   | 0.68   | 4334   | 0.76     |

|        |          |        |        |        |
|--------|----------|--------|--------|--------|
| Totals | 50487060 | 100.00 | 572463 | 100.00 |
|--------|----------|--------|--------|--------|

## Arylation with heteroaryl iodides

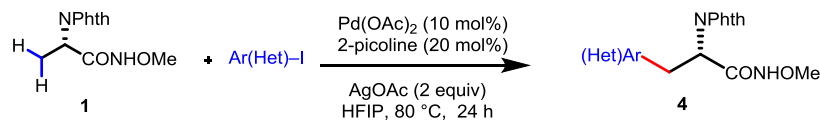

**General procedure for monoarylation of **1** with heterocyclic iodides:** The starting material **1** (0.1 mmol, 24.8 mg), Pd(OAc)<sub>2</sub> (10 mol%, 2.2 mg), and AgOAc (0.2 mmol, 33.4 mg) were weighed in air and placed in a sealed tube (10 mL) with a magnetic stir bar. To the reaction mixture, aryl iodide (0.15 mmol), 2-picoline (20 mol%, 2  $\mu$ L), HFIP (1.0 mL) were added. The reaction mixture was first stirred at room temperature for 10 min and then heated to 80 °C for 24 hours under vigorous stirring. Upon completion, the reaction mixture was cooled to room temperature, filtered with celite using DCM. The solvents were removed under reduced pressure and the resulting mixture was purified by a silica gel-packed flash chromatography column using DCM/EtOAc (1/0 to 4/1 to 2/1) as the eluent.

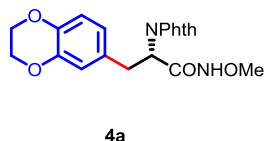

### (S)-3-(2,3-Dihydrobenzo[b][1,4]dioxin-6-yl)-2-(1,3-dioxoisindolin-2-yl)-N-methoxypropanamide (**4a**)

Substrate **1** was arylated following the general arylation procedure. Analysis of crude reaction mixture by <sup>1</sup>H NMR showed a > 20:1 ratio of mono- and diarylated products. After purification by column chromatography using DCM/EtOAc (1/0 to 4/1 to 2/1) as the eluent, **4a** was obtained as a white solid (29.0 mg, 76%). <sup>1</sup>H NMR (600 MHz, CDCl<sub>3</sub>)  $\delta$  9.23 (s, 1H), 7.81-7.78 (m, 2H), 7.72-7.70 (m, 2H), 6.68 (s, 1H), 6.65 (d, *J* = 7.8 Hz, 1H), 6.60 (d, *J* = 7.8 Hz, 1H), 5.02 (m, 1H), 4.16-4.14 (m, 4H), 3.74 (s, 3H), 3.40 (m, 2H); <sup>13</sup>C NMR (150 MHz, CDCl<sub>3</sub>)  $\delta$  167.93, 166.58, 143.49, 142.54, 134.36, 131.34, 129.16, 123.63, 121.75, 117.68, 117.35, 64.51, 64.16, 54.64, 34.10; HRMS (ESI-TOF) Calcd for C<sub>20</sub>H<sub>19</sub>N<sub>2</sub>O<sub>6</sub> [M+H]<sup>+</sup>: 383.1238; found: 383.1244.

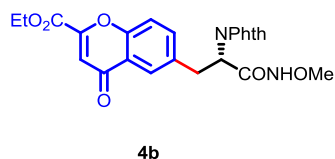

**Ethyl (S)-6-(2-(1,3-dioxoisindolin-2-yl)-3-(methoxyamino)-3-oxopropyl)-4-oxo-4H-chromene-3-carboxylate (4b)**

Substrate **1** was arylated following the general arylation procedure. Analysis of crude reaction mixture by  $^1\text{H}$  NMR showed a > 20:1 ratio of mono- and diarylated products. After purification by column chromatography using DCM/EtOAc (1/0 to 4/1 to 2/1) as the eluent, **4b** was obtained as a white solid (31.5 mg, 70%).  $^1\text{H}$  NMR (600 MHz,  $\text{CDCl}_3$ )  $\delta$  10.03 (s, 1H), 7.95 (s, 1H), 7.76-7.74 (m, 2H), 7.69-7.67 (m, 2H), 7.60 (dd,  $J$  = 8.7, 2.1 Hz, 1H), 7.44 (d,  $J$  = 8.7 Hz, 1H), 6.96 (s, 1H), 5.13 (m, 1H), 4.43 (q,  $J$  = 7.2 Hz, 2H), 3.77 (s, 3H), 3.68-3.67 (m, 2H), 1.41 (t,  $J$  = 7.2 Hz, 3H);  $^{13}\text{C}$  NMR (150 MHz,  $\text{CDCl}_3$ )  $\delta$  178.24, 167.67, 166.00, 160.38, 154.92, 152.19, 135.79, 134.86, 134.43, 131.23, 125.68, 124.12, 123.66, 119.18, 114.50, 64.45, 63.05, 53.83, 34.04, 14.07; HRMS (ESI-TOF) Calcd for  $\text{C}_{24}\text{H}_{21}\text{N}_2\text{O}_8$   $[\text{M}+\text{H}]^+$ : 465.1292; found: 465.1295.

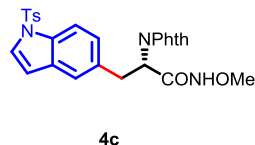

**(S)-2-(1,3-Dioxoisindolin-2-yl)-N-methoxy-3-(1-tosyl-1H-indol-5-yl)propanamide (4c)**

Substrate **1** was arylated following the general arylation procedure. Analysis of crude reaction mixture by  $^1\text{H}$  NMR showed a > 20:1 ratio of mono- and diarylated products. After purification by column chromatography using DCM/EtOAc (1/0 to 4/1 to 2/1) as the eluent, **4c** was obtained as a white solid (25.6 mg, 62%). m.p. = 194-196 °C.  $^1\text{H}$  NMR (600 MHz,  $\text{CDCl}_3$ )  $\delta$  9.12 (s, 1H), 7.79 (d,  $J$  = 9.0 Hz, 1H), 7.75-7.73 (m, 2H), 7.69-7.67 (m, 4H), 7.46 (d,  $J$  = 3.6 Hz, 1H), 7.33 (s, 1H), 7.18 (d,  $J$  = 8.4 Hz, 2H), 7.10 (d,  $J$  = 8.4 Hz, 1H), 6.50 (d,  $J$  = 3.6 Hz, 1H), 5.10 (m, 1H), 3.72 (s, 3H), 3.59-3.55 (m, 2H), 2.33 (s, 3H);  $^{13}\text{C}$  NMR (150 MHz,  $\text{CDCl}_3$ )  $\delta$  167.90, 166.71, 144.92, 135.16, 134.41, 133.88, 131.20, 131.08, 129.87, 126.73, 126.71, 125.37, 123.62, 121.67, 113.67, 108.82, 64.52, 54.80, 34.63, 21.55; HRMS (ESI-TOF) Calcd for  $\text{C}_{27}\text{H}_{24}\text{N}_3\text{O}_6\text{S}$   $[\text{M}+\text{H}]^+$ : 518.1380; found 518.1386.

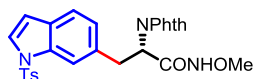

**4d**

**(S)-2-(1,3-Dioxoisindolin-2-yl)-N-methoxy-3-(1-tosyl-1H-indol-6-yl)propanamide (**4d**)**

Substrate **1** was arylated following the general arylation procedure. Analysis of crude reaction mixture by  $^1\text{H}$  NMR showed a > 20:1 ratio of mono- and diarylated products. After purification by column chromatography using DCM/EtOAc (1/0 to 4/1 to 2/1) as the eluent, **4d** was obtained as a white solid (33.7 mg, 65%).  $^1\text{H}$  NMR (600 MHz,  $\text{CDCl}_3$ )  $\delta$  9.24 (s, 1H), 7.83 (s, 1H), 7.77-7.75 (m, 2H), 7.72-7.68 (m, 4H), 7.42 (d,  $J$  = 3.6 Hz, 1H), 7.33 (d,  $J$  = 7.8 Hz, 1H), 7.21 (d,  $J$  = 8.4 Hz, 2H), 7.05 (d,  $J$  = 7.8 Hz, 1H), 6.51 (d,  $J$  = 3.0 Hz, 1H), 5.16 (m, 1H), 3.78 (s, 3H), 3.67-3.66 (m, 2H), 2.33 (s, 3H);  $^{13}\text{C}$  NMR (150 MHz,  $\text{CDCl}_3$ )  $\delta$  167.92, 166.51, 144.87, 135.19, 135.04, 134.36, 132.82, 131.29, 129.94, 129.71, 126.80, 126.37, 124.33, 123.64, 121.54, 113.81, 108.73, 64.56, 54.94, 35.11, 21.55; HRMS (ESI-TOF) Calcd for  $\text{C}_{27}\text{H}_{24}\text{N}_3\text{O}_6\text{S}$   $[\text{M}+\text{H}]^+$ : 518.1380; found: 518.1386.

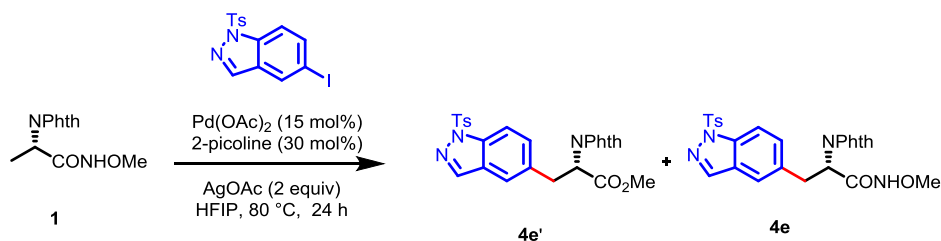

**Methyl (S)-2-(1,3-dioxoisindolin-2-yl)-3-(1-tosyl-1H-indazol-5-yl)propanoate (**4e'**)**

**(S)-2-(1,3-Dioxoisindolin-2-yl)-N-methoxy-3-(1-tosyl-1H-indazol-5-yl)propanamide (**4e**)**

Substrate **1** was arylated following the general arylation procedure except  $\text{Pd}(\text{OAc})_2$  (15 mol%, 3.3 mg) and 2-picoline (30 mol%, 3  $\mu\text{L}$ ). Analysis of crude reaction mixture by  $^1\text{H}$  NMR showed a > 20:1 ratio of mono- and diarylated products. After purification by column chromatography using DCM/EtOAc (1/0 to 4/1 to 2/1) as the eluent, **4e'** was obtained as a white solid (8.5 mg, 16%).  $^1\text{H}$  NMR (600 MHz,  $\text{CDCl}_3$ )  $\delta$  8.05-8.03 (m, 2H), 7.82-7.80 (m, 2H), 7.78-7.75 (m, 2H), 7.71-7.67 (m, 2H), 7.48 (s, 1H), 7.38 (dd,  $J$  = 8.4, 1.8 Hz, 1H), 7.21 (d,  $J$  = 8.4 Hz, 2H), 5.18 (dd,

$J = 10.8, 5.4$  Hz, 1H), 3.78 (s, 3H), 3.72-3.63 (m, 2H), 2.35 (s, 3H);  $^{13}\text{C}$  NMR (150 MHz,  $\text{CDCl}_3$ )  $\delta$  169.09, 167.45, 145.36, 140.97, 139.41, 134.52, 134.27, 132.96, 131.43, 130.28, 129.81, 127.55, 126.11, 123.58, 121.24, 113.34, 53.15, 53.02, 34.40, 21.63; HRMS (ESI-TOF) Calcd for  $\text{C}_{26}\text{H}_{22}\text{N}_3\text{O}_6\text{S}$   $[\text{M}+\text{H}]^+$ : 504.1224; found: 504.1225. **4e** was obtained as a white solid (21.8 mg, 42%).  $^1\text{H}$  NMR (600 MHz,  $\text{CDCl}_3$ )  $\delta$  9.28 (s, 1H), 8.03-8.01 (m, 2H), 7.80-7.79 (m, 2H), 7.75-7.73 (m, 2H), 7.69-7.68 (m, 2H), 7.48 (s, 1H), 7.38 (d,  $J = 8.4$  Hz, 1H), 7.22-7.20 (m, 2H), 5.12 (m, 1H), 3.74 (s, 3H), 3.64 (m, 2H), 2.34 (s, 3H);  $^{13}\text{C}$  NMR (150 MHz,  $\text{CDCl}_3$ )  $\delta$  167.81, 166.25, 145.44, 140.94, 139.40, 134.56, 134.42, 132.38, 131.07, 130.26, 129.83, 127.52, 126.10, 123.69, 121.43, 113.39, 64.57, 54.35, 34.38, 21.63; HRMS (ESI-TOF) Calcd for  $\text{C}_{26}\text{H}_{23}\text{N}_4\text{O}_6\text{S}$   $[\text{M}+\text{H}]^+$ : 519.1333; found: 519.1339.

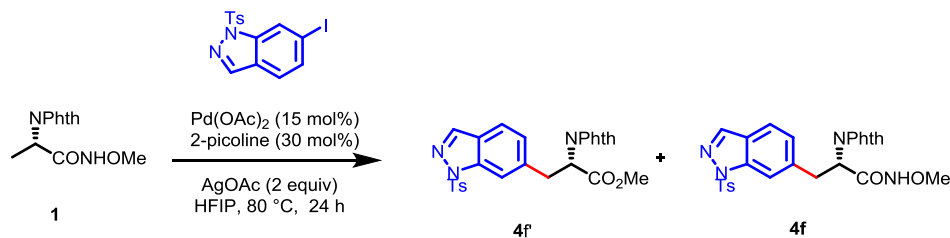

### Methyl (*S*)-2-(1,3-dioxisoindolin-2-yl)-3-(1-tosyl-1H-indazol-6-yl)propanoate (**4f'**)

### (*S*)-2-(1,3-Dioxisoindolin-2-yl)-*N*-methoxy-3-(1-tosyl-1H-indazol-6-yl)propanamide (**4f**)

Substrate **1** was arylated following the general arylation procedure except  $\text{Pd}(\text{OAc})_2$  (15 mol%, 3.3 mg) and 2-picoline (30 mol%, 3  $\mu\text{L}$ ). Analysis of crude reaction mixture by  $^1\text{H}$  NMR showed a  $> 20:1$  ratio of mono- and diarylated products. After purification by column chromatography using DCM/EtOAc (1/0 to 4/1 to 2/1) as the eluent, **4f'** was obtained as a white solid (11.6 mg, 22%).  $^1\text{H}$  NMR (600 MHz,  $\text{CDCl}_3$ )  $\delta$  8.04 (m, 2H), 7.80-7.76 (m, 4H), 7.72-7.70 (m, 2H), 7.51 (dd,  $J = 8.2, 0.7$  Hz, 1H), 7.19-7.15 (m, 3H), 5.24 (dd,  $J = 11.4, 5.4$  Hz, 1H), 3.82 (s, 3H), 3.80-3.75 (m, 2H), 2.34 (s, 3H);  $^{13}\text{C}$  NMR (150 MHz,  $\text{CDCl}_3$ )  $\delta$  168.98, 167.38, 145.22, 141.02, 140.63, 138.82, 134.53, 134.23, 131.52, 129.81, 127.53, 125.44, 124.84, 123.61, 121.41, 113.28, 53.33, 53.08, 35.13, 21.64; HRMS (ESI-TOF) Calcd for  $\text{C}_{26}\text{H}_{22}\text{N}_3\text{O}_6\text{S}$   $[\text{M}+\text{H}]^+$ : 504.1224; found: 504.1225. **4f** was obtained as a white solid (23.0 mg, 44%).  $^1\text{H}$  NMR (600 MHz,  $\text{CDCl}_3$ )  $\delta$  9.40

(s, 1H), 8.03 (s, 1H), 7.80 (s, 1H), 7.78-7.76 (m, 4H), 7.71-7.69 (m, 2H), 7.51 (d,  $J = 7.8$  Hz, 1H), 7.20 (d,  $J = 7.8$  Hz, 2H), 7.17 (d,  $J = 8.4$  Hz, 1H), 5.21 (m, 1H), 3.80 (s, 3H), 3.77-3.68 (m, 2H), 2.34 (s, 3H);  $^{13}\text{C}$  NMR (150 MHz,  $\text{CDCl}_3$ )  $\delta$  167.81, 165.93, 145.33, 140.96, 140.50, 138.28, 134.52, 134.43, 131.16, 129.85, 127.51, 125.50, 124.88, 123.73, 121.56, 113.24, 64.69, 54.44, 35.13, 21.64; HRMS (ESI-TOF) Calcd for  $\text{C}_{26}\text{H}_{23}\text{N}_4\text{O}_6\text{S}$   $[\text{M}+\text{H}]^+$ : 519.1333; found: 519.1340.

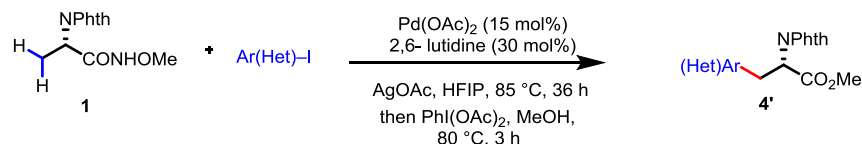

### General procedure for monoarylation of **1** with heterocyclic iodides:

Method A. The starting material **1** (0.1 mmol, 24.8 mg),  $\text{Pd}(\text{OAc})_2$  (15 mol%, 3.3 mg), and  $\text{AgOAc}$  (0.2 mmol, 33.4 mg) were weighed in air and placed in a sealed tube (10 mL) with a magnetic stir bar. To the reaction mixture, aryl iodide (0.15 mmol), 2,6-lutidine (30 mol%, 3  $\mu\text{L}$ ), HFIP (1.0 mL) were added. The reaction mixture was first stirred at room temperature for 10 min and then heated to 80 °C for 36 hours under vigorous stirring. Upon completion, the reaction mixture was cooled to room temperature, filtered with celite using DCM. The solvents were removed under reduced pressure and the resulting mixture was added  $\text{PhI}(\text{OAc})_2$  (0.1 mmol, 32.2 mg) and MeOH (1 mL) in a sealed tube (10 mL) with a magnetic stir bar. The reaction mixture was heated to 80 °C for 3 hours. Upon completion, the reaction mixture was cooled to room temperature, filtered with celite using DCM. The solvents were removed under reduced pressure and the resulting mixture was purified by a silica gel-packed flash chromatography column using hexanes/EtOAc (5/1 to 4/1 to 2/1) as the eluent.

Method B. The starting material **1** (0.2 mmol, 49.6 mg),  $\text{Pd}(\text{OAc})_2$  (15 mol%, 3.3 mg), and  $\text{AgOAc}$  (0.2 mmol, 33.4 mg) were weighed in air and placed in a sealed tube (10 mL) with a magnetic stir bar. To the reaction mixture, aryl iodide (0.1 mmol), 2,6-lutidine (30 mol%, 3  $\mu\text{L}$ ), HFIP (1.0 mL) were added. The reaction mixture was first stirred at room temperature for 10 min and then heated to 80 °C for 36 hours under vigorous stirring. Upon completion, the reaction mixture was cooled to room temperature, filtered with celite using DCM. The solvents were

removed under reduced pressure and the resulting mixture was added  $\text{PhI}(\text{OAc})_2$  (0.2 mmol, 64.4 mg) and MeOH (1 mL) in a sealed tube (10 mL) with a magnetic stir bar, The reaction mixture was heated to 80 °C for 3 hours, Upon completion, the reaction mixture was cooled to room temperature, filtered with celite using DCM. The solvents were removed under reduced pressure and the resulting mixture was purified by a silica gel-packed flash chromatography column using hexanes/EtOAc (5/1 to 4/1 to 2/1) as the eluent.

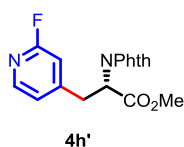

#### Methyl (S)-2-(1,3-dioxisoindolin-2-yl)-3-(2-fluoropyridin-4-yl)propanoate (**4h'**)

Substrate **1** was arylated following the general arylation and deprotection (method A). After purification by column chromatography using hexanes/EtOAc (3/1) as the eluent, **4h'** was obtained as a white solid (16.0 mg, 47%). <sup>1</sup>H NMR (600 MHz, CDCl<sub>3</sub>) δ 8.07 (d, *J* = 5.4 Hz, 1H), 7.82-7.81 (m, 2H), 7.75-7.73 (m, 2H), 7.03 (d, *J* = 5.4 Hz, 1H), 6.77 (m, 1H), 5.20 (dd, *J* = 10.5, 5.7 Hz, 1H), 3.79 (s, 3H), 3.64-3.62 (m, 2H); <sup>13</sup>C NMR (150 MHz, CDCl<sub>3</sub>) δ 168.58, 167.34, 163.98 (d, *J*<sub>FC</sub> = 87.6 Hz), 151.79 (d, *J*<sub>FC</sub> = 7.8 Hz), 147.85 (d, *J*<sub>FC</sub> = 15.2 Hz), 134.48, 131.34, 123.77, 121.69 (d, *J*<sub>FC</sub> = 4.1 Hz), 109.85 (d, *J*<sub>FC</sub> = 37.1 Hz), 53.22, 51.80, 34.03 (d, *J*<sub>FC</sub> = 2.9 Hz); HRMS (ESI-TOF) Calcd for C<sub>17</sub>H<sub>14</sub>FN<sub>2</sub>O<sub>4</sub> [M+H]<sup>+</sup>: 329.0932; found: 329.0929.

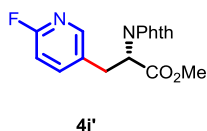

#### Methyl (S)-2-(1,3-dioxisoindolin-2-yl)-3-(6-fluoropyridin-3-yl)propanoate (**4i'**)

Substrate **1** was arylated following the general arylation and deprotection (method A). After purification by column chromatography using hexanes/EtOAc (3/1) as the eluent, **4i'** was obtained as a white solid (18.5mg, 56%). <sup>1</sup>H NMR (600 MHz, CDCl<sub>3</sub>) δ 7.98-7.97 (m, 1H), 7.81-7.80 (m, 2H), 7.74-7.72 (m, 2H), 7.68-7.65 (m, 1H), 6.82 (dd, *J* = 8.4, 3.0 Hz, 1H), 5.09 (dd, *J* =

10.2, 6.6 Hz, 1H), 3.80 (s, 3H), 3.58-3.56 (m, 2H);  $^{13}\text{C}$  NMR (150 MHz,  $\text{CDCl}_3$ )  $\delta$  168.73, 167.35, 162.80 (d,  $J_{\text{FC}} = 237.3$  Hz), 147.79 (d,  $J_{\text{FC}} = 14.1$  Hz), 141.50 (d,  $J_{\text{FC}} = 6.3$  Hz), 134.43, 131.36, 129.94 (d,  $J_{\text{FC}} = 4.2$  Hz), 123.75, 109.56 (d,  $J_{\text{FC}} = 37.5$  Hz), 53.13, 52.62, 31.40; HRMS (ESI-TOF) Calcd for  $\text{C}_{17}\text{H}_{14}\text{FN}_2\text{O}_4$   $[\text{M}+\text{H}]^+$ : 329.0932; found: 329.0942.

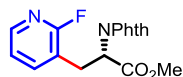

**4j'**

### Methyl (*S*)-2-(1,3-dioxoisindolin-2-yl)-3-(2-fluoropyridin-3-yl)propanoate (**4j'**)

Substrate **1** was arylated following the general arylation and deprotection (method A). After purification by column chromatography using hexanes/EtOAc (3/1) as the eluent, **4j'** was obtained as a white solid (9.8 mg, 30%).  $^1\text{H}$  NMR (600 MHz,  $\text{CDCl}_3$ )  $\delta$  8.05-8.04 (m, 1H), 7.82-7.81 (m, 2H), 7.73-7.72 (m, 2H), 7.62-7.59 (m, 1H), 7.05-7.02 (m, 1H), 5.19 (dd,  $J = 10.8, 4.8$  Hz, 1H), 3.79 (s, 3H), 3.64 (dd,  $J = 14.7, 5.1$  Hz, 1H), 3.55 (dd,  $J = 14.4, 10.8$  Hz, 1H);  $^{13}\text{C}$  NMR (150 MHz,  $\text{CDCl}_3$ )  $\delta$  168.76, 167.26, 162.15 (d,  $J_{\text{FC}} = 88.4$  Hz), 146.50 (d,  $J_{\text{FC}} = 14.7$  Hz), 141.82 (d,  $J_{\text{FC}} = 5.6$  Hz), 134.32, 131.47, 123.67, 121.53 (d,  $J_{\text{FC}} = 4.8$  Hz), 118.88 (d,  $J_{\text{FC}} = 30.5$  Hz), 53.09, 51.34, 28.80 (d,  $J_{\text{FC}} = 3.2$  Hz); HRMS (ESI-TOF) Calcd for  $\text{C}_{17}\text{H}_{14}\text{FN}_2\text{O}_4$   $[\text{M}+\text{H}]^+$ : 329.0932; found: 329.0940.

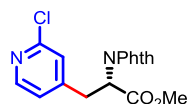

**4k'**

### Methyl (*S*)-3-(2-chloropyridin-4-yl)-2-(1,3-dioxoisindolin-2-yl)propanoate (**4k'**)

Substrate **1** was arylated following the general arylation and deprotection (method A). After purification by column chromatography using hexanes/EtOAc (3/1) as the eluent, **4k'** was obtained as a white solid (19.8 mg, 57%).  $^1\text{H}$  NMR (600 MHz,  $\text{CDCl}_3$ )  $\delta$  8.23 (d,  $J = 4.8$  Hz, 1H), 7.83-7.82 (m, 2H), 7.75-7.73 (m, 2H), 7.18 (s, 1H), 7.07 (dd,  $J = 5.1, 1.5$  Hz, 1H), 5.18 (dd,  $J = 10.8, 5.4$  Hz, 1H), 3.79 (s, 3H), 3.62-3.54 (m, 2H);  $^{13}\text{C}$  NMR (150 MHz,  $\text{CDCl}_3$ )  $\delta$  168.54,



167.34, 151.90, 149.81, 149.23, 134.49, 131.33, 124.66, 123.77, 122.70, 53.22, 51.72, 33.93; HRMS (ESI-TOF) Calcd for C<sub>17</sub>H<sub>14</sub>ClN<sub>2</sub>O<sub>4</sub> [M+H]<sup>+</sup>: 345.0637; found: 345.0635.

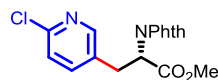

4l'

**Methyl (S)-3-(6-chloropyridin-3-yl)-2-(1,3-dioxoisindolin-2-yl)propanoate (4l')**

Substrate **1** was arylated following the general arylation and deprotection (method A). After purification by column chromatography using hexanes/EtOAc (3/1) as the eluent, **4l'** was obtained as a white solid (21.0 mg, 61%). <sup>1</sup>H NMR (600 MHz, CDCl<sub>3</sub>) δ 8.16 (dd, *J* = 2.4, 0.6 Hz, 1H), 7.82-7.80 (m, 2H), 7.74-7.73 (m, 2H), 7.54 (dd, *J* = 8.2, 2.5 Hz, 1H), 7.21 (dd, *J* = 8.2, 0.7 Hz, 1H), 5.09 (dd, *J* = 10.0, 6.4 Hz, 1H), 3.79 (s, 3H), 3.57-3.55 (m, 2H); <sup>13</sup>C NMR (150 MHz, CDCl<sub>3</sub>) δ 168.66, 167.35, 150.28, 150.03, 139.14, 134.45, 131.35, 131.27, 124.23, 123.76, 53.16, 52.47, 31.35; HRMS (ESI-TOF) Calcd for C<sub>17</sub>H<sub>14</sub>ClN<sub>2</sub>O<sub>4</sub> [M+H]<sup>+</sup>: 345.0637; found: 345.0638.

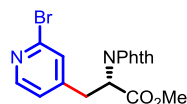

4m'

**Methyl (S)-3-(2-bromopyridin-4-yl)-2-(1,3-dioxoisindolin-2-yl)propanoate (4m')**

Substrate **1** was arylated following the general arylation and deprotection (method A). After purification by column chromatography using hexanes/EtOAc (3/1) as the eluent, **4m'** was obtained as a white solid (18.3 mg, 47%). <sup>1</sup>H NMR (600 MHz, CDCl<sub>3</sub>) δ 8.21 (d, *J* = 5.4 Hz, 1H), 7.83-7.82 (m, 2H), 7.75-7.74 (m, 2H), 7.34 (s, 1H), 7.11 (d, *J* = 4.8 Hz, 1H), 5.17 (dd, *J* = 10.8, 5.4 Hz, 1H), 3.79 (s, 3H), 3.60-3.51 (m, 2H); <sup>13</sup>C NMR (150 MHz, CDCl<sub>3</sub>) δ 168.52, 167.33, 150.22, 148.95, 142.60, 134.49, 131.33, 128.47, 123.78, 123.06, 53.22, 51.70, 33.85; HRMS (ESI-TOF) Calcd for C<sub>17</sub>H<sub>14</sub>BrN<sub>2</sub>O<sub>4</sub> [M+H]<sup>+</sup>: 389.0131; found: 389.0132.

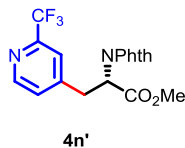

**Methyl (S)-2-(1,3-dioxisoindolin-2-yl)-3-(2-(trifluoromethyl)pyridin-4-yl)propanoate (4n')**

Substrate **1** was arylated following the general arylation and deprotection (method A). After purification by column chromatography using hexanes/EtOAc (3/1) as the eluent, **4n'** was obtained as a white solid (25.0 mg, 66%). <sup>1</sup>H NMR (600 MHz, CDCl<sub>3</sub>) δ 8.57 (d, *J* = 4.8 Hz, 1H), 7.84-7.81 (m, 2H), 7.76-7.72 (m, 2H), 7.52 (s, 1H), 7.35 (d, *J* = 4.8 Hz, 1H), 5.21 (dd, *J* = 11.1, 5.7 Hz, 1H), 3.79 (s, 3H), 3.73-3.63 (m, 2H); <sup>13</sup>C NMR (150 MHz, CDCl<sub>3</sub>) δ 168.48, 167.32, 150.21, 148.57 (q, *J*<sub>FC</sub> = 34.0 Hz), 148.02, 134.54, 131.30, 126.66, 123.78, 121.32 (q, *J*<sub>FC</sub> = 272.5 Hz), 121.00-120.95, 53.26, 51.70, 34.33; HRMS (ESI-TOF) Calcd for C<sub>18</sub>H<sub>14</sub>F<sub>3</sub>N<sub>2</sub>O<sub>4</sub> [M+H]<sup>+</sup>: 379.0900; found: 379.0910.

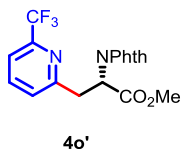

**Methyl (S)-2-(1,3-dioxisoindolin-2-yl)-3-(6-(trifluoromethyl)pyridin-2-yl)propanoate (4o')**

Substrate **1** was arylated following the general arylation and deprotection (method A). After purification by column chromatography using hexanes/EtOAc (3/1) as the eluent, **4o'** was obtained as a white solid (17.6 mg, 47%). <sup>1</sup>H NMR (600 MHz, CDCl<sub>3</sub>) δ 7.82-7.79 (m, 2H), 7.74-7.70 (m, 3H), 7.45 (d, *J* = 7.2 Hz, 1H), 7.38 (d, *J* = 7.8 Hz, 1H), 5.46 (dd, *J* = 8.4, 7.2 Hz, 1H), 3.79-3.78 (m, 2H), 3.78 (s, 3H); <sup>13</sup>C NMR (150 MHz, CDCl<sub>3</sub>) δ 169.31, 167.39, 158.02, 147.82 (q, *J*<sub>FC</sub> = 34.5 Hz), 137.82, 134.07, 131.76, 126.44, 123.46, 121.14 (q, *J*<sub>FC</sub> = 272.7 Hz), 118.48-118.40, 52.98, 51.23, 36.11; HRMS (ESI-TOF) Calcd for C<sub>18</sub>H<sub>14</sub>F<sub>3</sub>N<sub>2</sub>O<sub>4</sub> [M+H]<sup>+</sup>: 379.0900; found: 379.0898.

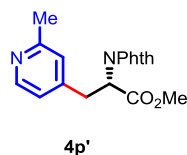

**Methyl (S)-2-(1,3-dioxisoindolin-2-yl)-3-(2-methylpyridin-4-yl)propanoate (4p')**

Substrate **1** was arylated following the general arylation and deprotection (method B). After purification by column chromatography using hexanes/EtOAc (3/1) as the eluent, **4p'** was obtained as a white solid (13.7 mg, 42%). <sup>1</sup>H NMR (600 MHz, CDCl<sub>3</sub>) δ 8.31 (d, *J* = 4.8 Hz, 1H), 7.81-7.80 (m, 2H), 7.73-7.71 (m, 2H), 6.99 (s, 1H), 6.92 (dd, *J* = 5.4, 1.2 Hz, 1H), 5.20 (dd, *J* = 10.8, 6.0 Hz, 1H), 3.79 (s, 3H), 3.56-3.53 (m, 2H), 2.43 (s, 3H); <sup>13</sup>C NMR (150 MHz, CDCl<sub>3</sub>) δ 168.92, 167.40, 158.66, 149.24, 146.08, 134.33, 131.43, 123.69, 123.63, 121.07, 53.10, 52.05, 34.04, 24.24; HRMS (ESI-TOF) Calcd for C<sub>18</sub>H<sub>17</sub>N<sub>2</sub>O<sub>4</sub> [M+H]<sup>+</sup>: 325.1183; found: 325.1184.

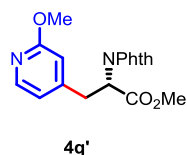

**Methyl (S)-2-(1,3-dioxisoindolin-2-yl)-3-(2-methoxypyridin-4-yl)propanoate (4q')**

Substrate **1** was arylated following the general arylation and deprotection (method B). After purification by column chromatography using hexanes/EtOAc (3/1) as the eluent, **4q'** was obtained as a white solid (17.1 mg, 50%). <sup>1</sup>H NMR (600 MHz, CDCl<sub>3</sub>) δ 7.99 (d, *J* = 5.4 Hz, 1H), 7.82-7.79 (m, 2H), 7.73-7.70 (m, 2H), 6.71 (dd, *J* = 5.1, 1.5 Hz, 1H), 6.56 (s, 1H), 5.18 (dd, *J* = 10.2, 6.0 Hz, 1H), 3.84 (s, 3H), 3.78 (s, 3H), 3.55-3.53 (m, 2H); <sup>13</sup>C NMR (150 MHz, CDCl<sub>3</sub>) δ 168.92, 167.38, 164.51, 148.56, 147.02, 134.28, 131.49, 123.66, 117.21, 110.91, 53.34, 53.09, 52.07, 33.96; HRMS (ESI-TOF) Calcd for C<sub>18</sub>H<sub>17</sub>N<sub>2</sub>O<sub>5</sub> [M+H]<sup>+</sup>: 341.1132; found 341.1134.



152.81, 148.72, 148.70, 134.49, 133.06, 131.35, 124.46, 123.80, 59.01, 53.23, 52.15, 32.24; HRMS (ESI-TOF) Calcd for C<sub>18</sub>H<sub>16</sub>ClN<sub>2</sub>O<sub>5</sub> [M+H]<sup>+</sup>: 375.0742; found: 375.0743.

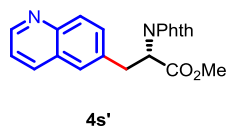

#### Methyl (S)-2-(1,3-dioxisoindolin-2-yl)-3-(quinolin-6-yl)propanoate (**4s'**)

Substrate **1** was arylated following the general arylation and deprotection (method B). After purification by column chromatography using hexanes/EtOAc (3/1) as the eluent, **4s'** was obtained as a white solid (15.6 mg, 43%). <sup>1</sup>H NMR (600 MHz, CDCl<sub>3</sub>) δ 8.82 (dd, *J* = 3.6, 1.2 Hz, 1H), 8.03-8.01 (m, 1H), 7.96 (d, *J* = 8.4 Hz, 1H), 7.76-7.74 (m, 2H), 7.67-7.62 (m, 2H), 7.62 (d, *J* = 1.2 Hz, 1H), 7.56 (dd, *J* = 8.7, 2.0 Hz, 1H), 7.32 (dd, *J* = 8.4, 4.2 Hz, 1H), 5.30 (dd, *J* = 10.8, 5.4 Hz, 1H), 3.83 (s, 3H), 3.82-3.74 (m, 2H); <sup>13</sup>C NMR (150 MHz, CDCl<sub>3</sub>) δ 169.18, 167.47, 150.10, 147.24, 135.85, 135.24, 134.19, 131.45, 130.53, 129.64, 128.21, 127.50, 123.56, 121.25, 53.04, 52.93, 34.67; HRMS (ESI-TOF) Calcd for C<sub>21</sub>H<sub>17</sub>N<sub>2</sub>O<sub>4</sub> [M+H]<sup>+</sup>: 361.1183; found: 361.1185.

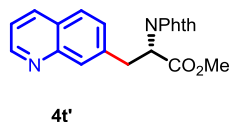

#### Methyl (S)-2-(1,3-dioxisoindolin-2-yl)-3-(quinolin-7-yl)propanoate (**4t'**)

Substrate **1** was arylated following the general arylation and deprotection (method B). After purification by column chromatography using hexanes/EtOAc (3/1) as the eluent, **4t'** was obtained as a white solid (14.9 mg, 42%). <sup>1</sup>H NMR (600 MHz, CDCl<sub>3</sub>) δ 8.82 (dd, *J* = 4.2, 1.8 Hz, 1H), 8.07-8.05 (m, 1H), 7.87 (s, 1H), 7.76-7.73 (m, 2H), 7.71 (d, *J* = 8.4 Hz, 1H), 7.67-7.64 (m, 2H), 7.44 (dd, *J* = 8.4, 1.8 Hz, 1H), 7.31 (dd, *J* = 8.4, 4.2 Hz, 1H), 5.29 (dd, *J* = 11.1, 5.1 Hz, 1H), 3.84-3.74 (m, 2H), 3.80 (s, 3H); <sup>13</sup>C NMR (150 MHz, CDCl<sub>3</sub>) δ 169.17, 167.41, 150.52,

148.21, 138.51, 135.80, 134.12, 131.52, 129.29, 128.15, 127.53, 127.11, 123.58, 120.87, 53.06, 53.03, 35.01; HRMS (ESI-TOF) Calcd for C<sub>21</sub>H<sub>17</sub>N<sub>2</sub>O<sub>4</sub> [M+H]<sup>+</sup>: 361.1183; found: 361.1188.

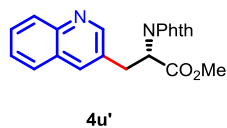

#### Methyl (S)-2-(1,3-dioxoisindolin-2-yl)-3-(quinolin-3-yl)propanoate (**4u'**)

Substrate **1** was arylated following the general arylation and deprotection (method B). After purification by column chromatography using hexanes/EtOAc (3/1) as the eluent, **4u'** was obtained as a white solid (11.0 mg, 31%). <sup>1</sup>H NMR (600 MHz, CDCl<sub>3</sub>) δ 8.75 (d, *J* = 2.4 Hz, 1H), 8.02-8.00 (m, 2H), 7.79-7.76 (m, 2H), 7.72-7.71 (m, 1H), 7.70-7.67 (m, 2H), 7.66-7.63 (m, 1H), 7.50-7.47 (m, 1H), 5.27 (dd, *J* = 10.8, 5.4 Hz, 1H), 3.86-3.73 (m, 2H), 3.81 (s, 3H); <sup>13</sup>C NMR (150 MHz, CDCl<sub>3</sub>) δ 168.93, 167.47, 151.45, 147.21, 135.53, 134.30, 131.44, 129.63, 129.23, 129.15, 127.84, 127.53, 126.78, 123.68, 53.11, 52.83, 32.23; HRMS (ESI-TOF) Calcd for C<sub>21</sub>H<sub>17</sub>N<sub>2</sub>O<sub>4</sub> [M+H]<sup>+</sup>: 361.1183; found: 361.1185.

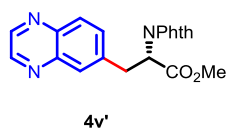

#### Methyl (S)-2-(1,3-dioxoisindolin-2-yl)-3-(quinoxalin-6-yl)propanoate (**4v'**)

Substrate **1** was arylated following the general arylation and deprotection (method B). After purification by column chromatography using hexanes/EtOAc (3/1) as the eluent, **4v'** was obtained as a white solid (16.2 mg, 45%). <sup>1</sup>H NMR (600 MHz, CDCl<sub>3</sub>) δ 8.76 (s, 2H), 7.99 (d, *J* = 8.4 Hz, 1H), 7.90-7.89 (m, 1H), 7.77-7.76 (m, 2H), 7.69-7.65 (m, 3H), 5.30 (dd, *J* = 10.8, 5.4 Hz, 1H), 3.88-3.75 (m, 2H), 3.81 (s, 3H); <sup>13</sup>C NMR (150 MHz, CDCl<sub>3</sub>) δ 168.99, 167.39, 145.12, 144.73, 142.89, 142.04, 139.41, 134.23, 131.44, 131.17, 129.75, 129.22, 123.64, 53.10, 52.86, 34.89; HRMS (ESI-TOF) Calcd for C<sub>20</sub>H<sub>16</sub>N<sub>3</sub>O<sub>4</sub> [M+H]<sup>+</sup>: 362.1135; found: 362.1139.

## Arylation of methylene C–H bonds

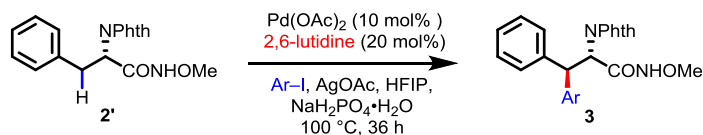

**General procedure:** The substrate **2'** (0.1 mmol, 24.8 mg),  $\text{Pd}(\text{OAc})_2$  (0.01 mmol, 2.2 mg),  $\text{NaH}_2\text{PO}_4 \cdot \text{H}_2\text{O}$  (0.3 mmol, 42 mg) and AgOAc (0.2 mmol, 33.4 mg) were weighed in air and placed in a sealed tube (10 mL) with a magnetic stir bar. To the reaction mixture, aryl iodide (0.3 mmol), 2,6-lutidine (0.02 mmol, 2  $\mu\text{L}$ ), HFIP (1 mL) were added. The reaction mixture was first stirred at room temperature for 10 min and then heated to 100 °C for 36 hours under vigorous stirring. Upon completion, the reaction mixture was cooled to room temperature, filtered with celite using DCM. The solvents were removed under reduced pressure and the resulting mixture was purified by a silica gel-packed flash chromatography column.

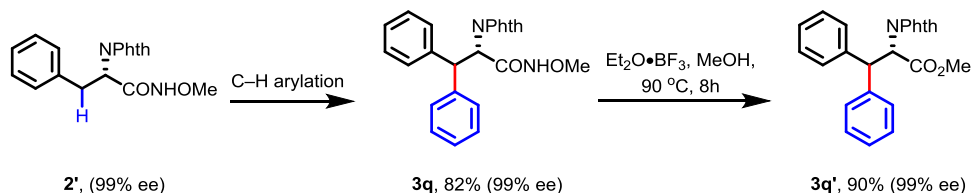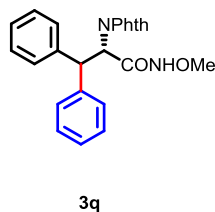

### (S)-2-(1,3-Dioxoisindolin-2-yl)-N-methoxy-3,3-diphenylpropanamide (**3q**)

Substrate **1** was arylated following the general arylation procedure. After purification by column chromatography using hexanes/EtOAc (2/1) as the eluent, **3q** was obtained as a white solid (30.7 mg, 77%). m.p. = 220–222 °C.  $^1\text{H}$  NMR (600 MHz,  $\text{CDCl}_3$ )  $\delta$  9.14 (s, 1H), 7.73–7.71 (m, 2H), 7.66–7.63 (m, 2H), 7.52–7.50 (m, 2H), 7.34 (t,  $J$  = 7.8 Hz, 2H), 7.28–7.26 (m, 2H), 7.24 (t,  $J$  = 7.2 Hz, 1H), 7.13 (t,  $J$  = 7.8 Hz, 2H), 7.03 (t,  $J$  = 7.2 Hz, 1H), 5.57 (d,  $J$  = 12.6 Hz, 1H), 5.32 (t,  $J$  = 12.6 Hz, 1H), 3.48 (s, 3H);  $^{13}\text{C}$  NMR (150 MHz,  $\text{CDCl}_3$ )  $\delta$  167.90, 164.99, 139.78, 139.73,

134.30, 131.07, 129.07, 128.73, 128.16, 127.63, 127.54, 127.13, 123.55, 64.14, 56.91, 50.20; HRMS (ESI-TOF) Calcd for  $C_{24}H_{21}N_2O_4$   $[M+H]^+$ : 401.1496; found: 401.1493. The ee value was determined by HPLC analysis on a Chiralcel OD-H column (20% isopropanol in hexanes, 0.4 mL/min) with  $t_r$  = 28.9 min (minor), 31.0 min (major): 99% ee.

#### Area % Report

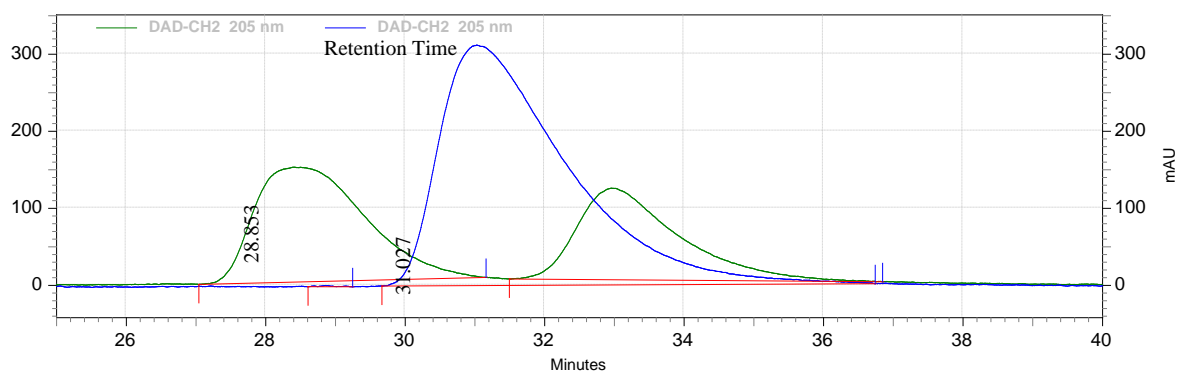

#### DAD-CH2 205 nm

##### Results

| Retention Time | Area      | Area % | Height  | Height % |
|----------------|-----------|--------|---------|----------|
| 28.853         | 102668    | 0.06   | 6381    | 0.51     |
| 31.027         | 159396134 | 99.94  | 1248555 | 99.49    |

| Totals |           |        |         |        |
|--------|-----------|--------|---------|--------|
|        | 159498802 | 100.00 | 1254936 | 100.00 |

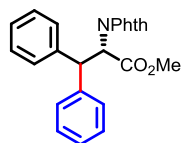

3q'



### Methyl (S)-2-(1,3-dioxoisindolin-2-yl)-3,3-diphenylpropanoate (**3q'**)

A sealable pressure flask was charged with MeOH (1 mL) and amide **3q** (0.1 mmol, 40 mg).  $\text{BF}_3 \cdot \text{OEt}_2$  (5 equiv.) was added and the reaction vessel sealed. The reaction mixture was heated to 90 °C for 8 hours under vigorous stirring. Upon completion, the reaction mixture was cooled to room temperature. The solvents were removed under reduced pressure and  $\text{H}_2\text{O}$  and EtOAc was added, organic layers were removed and the aqueous layer was then extracted with EtOAc and the combined organics washed with brine, dried over  $\text{MgSO}_4$ , filtered and concentrated. Purified by column chromatography (hexanes/EtOAc = 2/1 to 1/1) to provide **3q'** as a white solid (34.7 mg, 90%).  $^1\text{H}$  NMR (600 MHz,  $\text{CDCl}_3$ )  $\delta$  7.74-7.72 (m, 2H), 7.66-7.64 (m, 2H), 7.49 (d,  $J$  = 7.8 Hz, 2H), 7.33 (t,  $J$  = 7.8 Hz, 2H), 7.26-7.20 (m, 3H), 7.09 (t,  $J$  = 7.8 Hz, 2H), 6.98 (t,  $J$  = 7.2 Hz, 1H), 5.75 (d,  $J$  = 12.0 Hz, 1H), 5.27 (d,  $J$  = 12.0 Hz, 1H), 3.57 (s, 3H);  $^{13}\text{C}$  NMR (150 MHz,  $\text{CDCl}_3$ )  $\delta$  168.67, 167.29, 141.49, 140.35, 134.07, 131.31, 128.73, 128.49, 127.98, 127.70, 126.89, 126.87, 123.41, 54.81, 52.63, 50.56. The ee value was determined by HPLC analysis on a Chiralcel ADH column (10% isopropanol in hexanes, 0.5 mL/min) with  $t_r$  = 37.9 min (minor), 45.6 min (major): 98% ee.

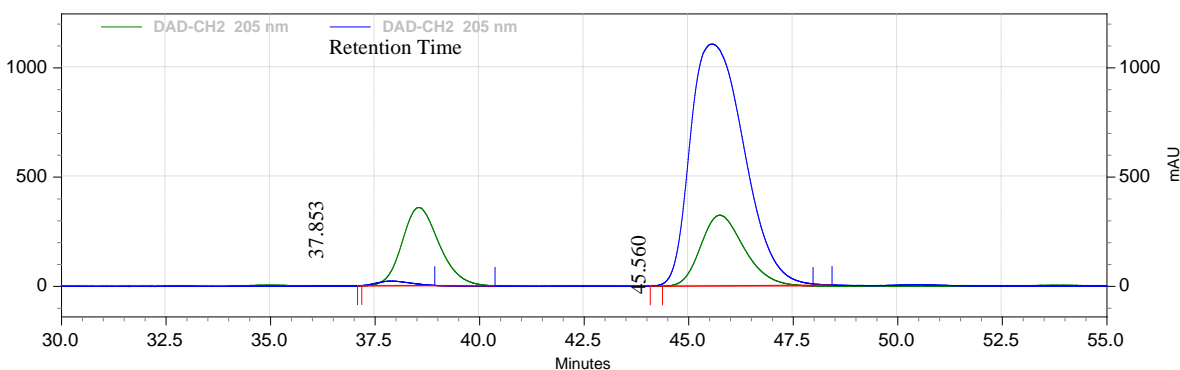

#### DAD-CH2 205 nm

#### Results

| Retention Time | Area    | Area % | Height | Height % |
|----------------|---------|--------|--------|----------|
| 37.853         | 4729873 | 1.18   | 85311  | 1.89     |

45.560                      395751505                      98.82                      4421105                      98.11

|        |           |        |         |        |
|--------|-----------|--------|---------|--------|
| Totals |           |        |         |        |
|        | 400481378 | 100.00 | 4506416 | 100.00 |

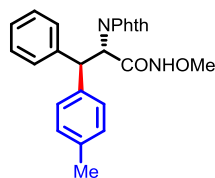

**3a**

**(2*S*, 3*R*)-2-(1,3-Dioxoisindolin-2-yl)-*N*-methoxy-3-phenyl-3-(*p*-tolyl)propanamide (3a)**

Substrate **2'** was arylated following the general arylation procedure. After purification by column chromatography using hexanes/EtOAc (2/1) as the eluent, **3a** was obtained as a white solid (33.6 mg, 81%). m.p. = 215-218 °C. <sup>1</sup>H NMR (600 MHz, CDCl<sub>3</sub>) δ 9.09 (s, 1H), 7.73-7.71 (m, 2H), 7.65-7.63 (m, 2H), 7.41-7.39 (m, 2H), 7.25 (d, *J* = 7.8 Hz, 2H), 7.15-7.11 (m, 4H), 7.03-7.00 (m, 1H), 5.56 (d, *J* = 12.6 Hz, 1H), 5.25 (d, *J* = 12.6 Hz, 1H), 3.52 (s, 3H), 2.29 (s, 3H); <sup>13</sup>C NMR (150 MHz, CDCl<sub>3</sub>) δ 167.92, 165.12, 140.05, 137.37, 136.68, 134.27, 131.09, 129.81, 128.70, 127.95, 127.45, 127.04, 123.53, 64.20, 56.95, 49.92, 21.04; HRMS (ESI-TOF) Calcd for C<sub>25</sub>H<sub>23</sub>N<sub>2</sub>O<sub>4</sub> [M+H]<sup>+</sup>: 415.1652; found: 415.1649.

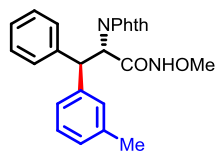

**3b**

**(2*S*, 3*R*)-2-(1,3-Dioxoisindolin-2-yl)-*N*-methoxy-3-phenyl-3-(*m*-tolyl)propanamide (3b)**

Substrate **2'** was arylated following the general arylation procedure. After purification by column chromatography using hexanes/EtOAc (2/1) as the eluent, **3b** was obtained as a white solid (33.6 mg, 82%). <sup>1</sup>H NMR (600 MHz, CDCl<sub>3</sub>) δ 9.07 (s, 1H), 7.74 (m, 2H), 7.66-7.63 (m, 2H), 7.32-7.26 (m, 4H), 7.22 (t, *J* = 7.8 Hz, 1H), 7.13 (t, *J* = 7.8 Hz, 2H), 7.05-7.01 (m, 2H), 5.56 (d, *J* = 12.6 Hz, 1H), 5.27 (d, *J* = 12.6 Hz, 1H), 3.52 (s, 3H), 2.35 (s, 3H); <sup>13</sup>C NMR (150 MHz, CDCl<sub>3</sub>) δ 167.88, 165.03, 139.92, 139.66, 138.76, 134.25, 131.09, 128.98, 128.93, 128.69, 128.43, 127.53, 127.06, 125.00, 123.51, 64.12, 56.79, 50.14, 45.20, 21.49; HRMS (ESI-TOF) Calcd for C<sub>25</sub>H<sub>23</sub>N<sub>2</sub>O<sub>4</sub> [M+H]<sup>+</sup>: 415.1652; found: 415.1651.

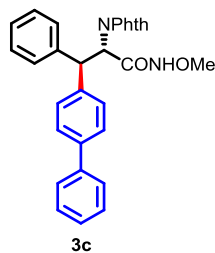

**(2*S*, 3*R*)-3-([1,1'-Biphenyl]-4-yl)-2-(1,3-dioxoisindolin-2-yl)-*N*-methoxy-3-phenyl propanamide (**3c**)**

Substrate **2'** was arylated following the general arylation procedure. After purification by column chromatography using hexanes/EtOAc (2/1) as the eluent, **3c** was obtained as a yellow solid (27.6 mg, 61%). <sup>1</sup>H NMR (600 MHz, CDCl<sub>3</sub>) δ 9.28 (s, 1H), 7.73-7.71 (m, 2H), 7.65-7.62 (m, 2H), 7.60-7.55 (m, 4H), 7.54-7.52 (m, 2H), 7.41 (t, *J* = 7.8 Hz, 2H), 7.33-7.30 (m, 3H), 7.15 (t, *J* = 7.8 Hz, 2H), 7.04 (t, *J* = 7.2 Hz, 1H), 5.61 (d, *J* = 12.6 Hz, 1H), 5.39 (d, *J* = 12.6 Hz, 1H), 3.51 (s, 3H). <sup>13</sup>C NMR (150 MHz, CDCl<sub>3</sub>) δ 167.92, 165.01, 140.41, 139.73, 138.73, 134.32, 134.26, 131.05, 128.82, 128.79, 128.75, 128.57, 127.69, 127.58, 127.36, 127.20, 126.98, 123.55, 64.18, 56.83, 49.85; HRMS (ESI-TOF) Calcd for C<sub>30</sub>H<sub>25</sub>N<sub>2</sub>O<sub>4</sub> [M+H]<sup>+</sup>: 477.1809; found: 477.1809.

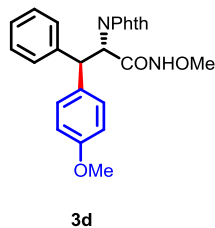

**(2*S*, 3*R*)-2-(1,3-Dioxoisindolin-2-yl)-*N*-methoxy-3-(4-methoxyphenyl)-3-phenyl propanamide (**3d**)**

Substrate **2'** was arylated following the general arylation procedure. After purification by column chromatography using hexanes/EtOAc (2/1) as the eluent, **3d** was obtained as a white solid (35.2 mg, 80%). m.p. = 175-178 °C. <sup>1</sup>H NMR (600 MHz, CDCl<sub>3</sub>) δ 9.15 (s, 1H), 7.74-7.71 (m, 2H), 7.66-7.63 (m, 2H), 7.44-7.41 (m, 2H), 7.27-7.24 (m, 2H), 7.14-7.12 (m, 2H), 7.04-7.01 (m, 1H), 6.89-6.88 (m, 2H), 5.52 (d, *J* = 12.6 Hz, 1H), 5.25 (d, *J* = 12.6 Hz, 1H), 3.76 (s, 3H), 3.53 (s, 3H); <sup>13</sup>C NMR (150 MHz, CDCl<sub>3</sub>) δ 167.94, 165.16, 158.94, 140.12, 134.30, 131.70, 131.08, 129.24, 129.21, 128.72, 127.40, 127.03, 123.54, 114.46, 64.23, 57.09, 55.24, 49.46; HRMS (ESI-TOF) Calcd for C<sub>25</sub>H<sub>23</sub>N<sub>2</sub>O<sub>5</sub> [M+H]<sup>+</sup>: 431.1601; found: 431.1601.

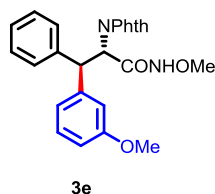

**(2*S*, 3*R*)-2-(1,3-Dioxoisindolin-2-yl)-*N*-methoxy-3-(3-methoxyphenyl)-3-phenylpropanamide (3e)**

Substrate **2'** was arylated following the general arylation procedure. After purification by column chromatography using hexanes/EtOAc (2/1) as the eluent, **3e** was obtained as a white solid (32.1 mg, 75%). <sup>1</sup>H NMR (600 MHz, CDCl<sub>3</sub>) δ 9.08 (s, 1H), 7.73-7.70 (m, 2H), 7.65-7.62 (m, 2H), 7.27-7.24 (m, 3H), 7.14-7.10 (m, 3H), 7.04-7.01 (m, 2H), 6.783-6.77 (m, 1H), 5.54 (d, *J* = 12.6 Hz, 1H), 5.30 (d, *J* = 12.6 Hz, 1H), 3.79 (s, 3H), 3.52 (s, 3H); <sup>13</sup>C NMR (150 MHz, CDCl<sub>3</sub>) δ 167.87, 165.00, 159.96, 141.35, 139.70, 134.27, 131.09, 130.13, 128.72, 127.55, 127.15, 123.53, 120.23, 114.21, 112.81, 64.17, 56.67, 55.26, 50.10; HRMS (ESI-TOF) Calcd for C<sub>25</sub>H<sub>23</sub>N<sub>2</sub>O<sub>5</sub> [M+H]<sup>+</sup>: 431.1601; found: 431.1606.

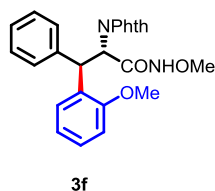

**(2*S*, 3*R*)-2-(1,3-Dioxoisindolin-2-yl)-*N*-methoxy-3-(2-methoxyphenyl)-3-phenylpropanamide (3f)**

Substrate **2'** was arylated following the general arylation procedure. After purification by column chromatography using hexanes/EtOAc (2/1) as the eluent, **3f** was obtained as a yellow solid (25.5 mg, 59%). <sup>1</sup>H NMR (600 MHz, CDCl<sub>3</sub>) δ 9.33 (s, 1H), 7.75-7.72 (m, 2H), 7.66-7.63 (m, 2H), 7.59-7.58 (m, 1H), 7.31-7.29 (m, 2H), 7.23-7.21 (m, 1H), 7.10 (t, *J* = 7.8 Hz, 2H), 7.01-6.98 (m, 2H), 6.88-6.87 (m, 1H), 5.80 (d, *J* = 13.2 Hz, 1H), 5.68 (d, *J* = 13.2 Hz, 1H), 3.90 (s, 3H), 3.46 (s, 3H); <sup>13</sup>C NMR (150 MHz, CDCl<sub>3</sub>) δ 168.21, 165.08, 156.76, 139.62, 134.23, 131.15, 128.70, 128.40, 128.34, 127.93, 126.87, 123.49, 121.25, 111.32, 110.02, 63.95, 56.61, 55.71, 42.80; HRMS (ESI-TOF) Calcd for C<sub>25</sub>H<sub>23</sub>N<sub>2</sub>O<sub>5</sub> [M+H]<sup>+</sup>: 431.1601; found: 431.1597.

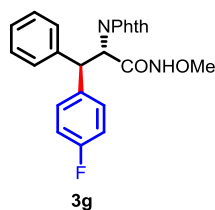

**(2*S*, 3*R*)-2-(1,3-Dioxoisindolin-2-yl)-3-(4-fluorophenyl)-*N*-methoxy-3-phenylpropanamide (3g)**

Substrate **2'** was arylated following the general arylation procedure. After purification by column chromatography using hexanes/EtOAc (2/1) as the eluent, **3g** was obtained as a white solid (30.1 mg, 72%). <sup>1</sup>H NMR (600 MHz, CDCl<sub>3</sub>) δ 9.37 (s, 1H), 7.73-7.70 (m, 2H), 7.67-7.64 (m, 2H), 7.49-7.47 (m, 2H), 7.24 (d, *J* = 7.8 Hz, 2H), 7.14 (t, *J* = 7.8 Hz, 2H), 7.06-7.00 (m, 3H), 5.51 (d, *J* = 12.6 Hz, 1H), 5.34 (d, *J* = 12.6 Hz, 1H), 3.52 (s, 3H); <sup>13</sup>C NMR (150 MHz, CDCl<sub>3</sub>) δ 167.90, 164.92, 162.02 (d, *J*<sub>FC</sub> = 245.1 Hz), 139.51, 135.51, 134.40, 130.98, 129.84 (d, *J*<sub>FC</sub> = 8.0 Hz), 128.83, 127.47, 127.28, 123.60, 115.83 (d, *J*<sub>FC</sub> = 21.2 Hz), 64.20, 56.98, 49.35; HRMS (ESI-TOF) Calcd for C<sub>24</sub>H<sub>20</sub>FN<sub>2</sub>O<sub>4</sub> [M+H]<sup>+</sup>: 419.1402; found: 419.1402.

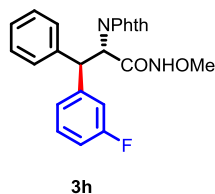

**(2*S*, 3*R*)-2-(1,3-Dioxoisindolin-2-yl)-3-(3-fluorophenyl)-*N*-methoxy-3-phenylpropanamide (3h)**

Substrate **2'** was arylated following the general arylation procedure. After purification by column chromatography using hexanes/EtOAc (2/1) as the eluent, **3h** was obtained as a white solid (29.2 mg, 70%). <sup>1</sup>H NMR (600 MHz, CDCl<sub>3</sub>) δ 9.33 (s, 1H), 7.73-7.71 (m, 2H), 7.67-7.64 (m, 2H), 7.32-7.29 (m, 2H), 7.27-7.25 (m, 2H), 7.21 (d, *J* = 10.2 Hz, 1H), 7.15 (t, *J* = 7.5 Hz, 2H), 7.06 (t, *J* = 7.2 Hz, 1H), 6.93 (t, *J* = 7.2 Hz, 1H), 5.51 (d, *J* = 12.6 Hz, 1H), 5.37 (d, *J* = 12.6 Hz, 1H), 3.53 (s, 3H); <sup>13</sup>C NMR (150 MHz, CDCl<sub>3</sub>) δ 167.83, 164.79, 162.91 (d, *J*<sub>FC</sub> = 245.4 Hz), 142.28, 139.10, 134.39, 130.98, 130.48 (d, *J*<sub>FC</sub> = 7.5 Hz), 128.85, 127.59, 127.39, 123.87, 123.60, 115.30 (d, *J*<sub>FC</sub> = 21.8 Hz), 114.51 (d, *J*<sub>FC</sub> = 20.7 Hz), 64.19, 56.60, 49.74; HRMS (ESI-TOF) Calcd for C<sub>24</sub>H<sub>20</sub>FN<sub>2</sub>O<sub>4</sub> [M+H]<sup>+</sup>: 419.1402; found: 419.1402.

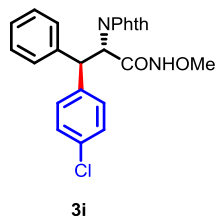

**(2*S*, 3*R*)-3-(4-chlorophenyl)-2-(1,3-dioxoisindolin-2-yl)-*N*-methoxy-3-phenylpropanamide (3i)**

Substrate **2'** was arylated following the general arylation procedure. After purification by column chromatography using hexanes/EtOAc (2/1) as the eluent, **3i** was obtained as a white solid (32.6 mg, 75%). <sup>1</sup>H NMR (600 MHz, CDCl<sub>3</sub>) δ 9.40 (s, 1H), 7.72-7.70 (m, 2H), 7.66-7.64 (m, 2H), 7.45-7.44 (m, 2H), 7.30-7.28 (m, 2H), 7.24-7.23 (m, 2H), 7.14 (t, *J* = 7.5 Hz, 2H), 7.06-7.03 (m, 1H), 5.51 (d, *J* = 12.6 Hz, 1H), 5.33 (d, *J* = 12.6 Hz, 1H), 3.53 (s, 3H); <sup>13</sup>C NMR (150 MHz,

CDCl<sub>3</sub>)  $\delta$  167.86, 164.84, 139.25, 138.24, 134.41, 133.38, 130.95, 129.56, 129.08, 128.85, 127.49, 127.35, 123.60, 64.22, 56.71, 49.46; HRMS (ESI-TOF) Calcd for C<sub>24</sub>H<sub>20</sub>ClN<sub>2</sub>O<sub>4</sub> [M+H]<sup>+</sup>: 435.1106; found: 435.1107.

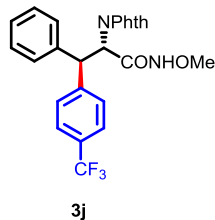

**(2*S*, 3*R*)-2-(1,3-dioxoisindolin-2-yl)-*N*-methoxy-3-phenyl-3-(4-(trifluoromethyl)phenyl)propanamide (3j)**

Substrate **2'** was arylated following the general arylation procedure. After purification by column chromatography using hexanes/EtOAc (2/1) as the eluent, **3j** was obtained as a white solid (34.9 mg, 75%). m.p. = 120-123 °C. <sup>1</sup>H NMR (600 MHz, CDCl<sub>3</sub>)  $\delta$  9.48 (s, 1H), 7.73-7.71 (m, 2H), 7.67-7.64 (m, 4H), 7.58 (d, *J* = 8.4 Hz, 2H), 7.26-7.25 (m, 2H), 7.15 (t, *J* = 7.5 Hz, 2H), 7.07-7.05 (m, 1H), 5.58 (d, *J* = 12.6 Hz, 1H), 5.45 (d, *J* = 12.6 Hz, 1H), 3.49 (s, 3H); <sup>13</sup>C NMR (150 MHz, CDCl<sub>3</sub>)  $\delta$  167.86, 164.75, 143.81, 138.81, 134.48, 130.93, 129.67 (q, *J*<sub>FC</sub> = 32.4 Hz), 128.94, 128.64, 127.62, 127.54, 125.93-125.75, 123.97 (q, *J*<sub>FC</sub> = 270.5 Hz), 123.65, 64.17, 56.47, 49.82; HRMS (ESI-TOF) Calcd for C<sub>25</sub>H<sub>20</sub>F<sub>3</sub>N<sub>2</sub>O<sub>4</sub> [M+H]<sup>+</sup>: 469.1370; found: 469.1372.

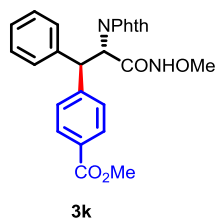

**Methyl 4-((1*R*, 2*S*)-2-(1,3-dioxoisindolin-2-yl)-3-(methoxyamino)-3-oxo-1-phenylpropyl)benzoate (3k)**

Substrate **2'** was arylated following the general arylation procedure. After purification by column chromatography using hexanes/EtOAc (2/1) as the eluent, **3k** was obtained as a white solid (34.7 mg, 76%). <sup>1</sup>H NMR (600 MHz, CDCl<sub>3</sub>)  $\delta$  9.49 (s, 1H), 7.99 (d, *J* = 8.4 Hz, 2H), 7.72-7.69 (m, 2H), 7.66-7.63 (m, 2H), 7.60 (d, *J* = 8.4 Hz, 2H), 7.26 (d, *J* = 7.2 Hz, 3H), 7.14 (t, *J* = 7.8 Hz, 3H), 7.05 (t, *J* = 7.2 Hz, 1H), 5.58 (d, *J* = 12.6 Hz, 1H), 5.45 (d, *J* = 12.6 Hz, 1H), 3.88 (s, 3H),

3.48 (s, 3H);  $^{13}\text{C}$  NMR (150 MHz,  $\text{CDCl}_3$ )  $\delta$  167.83, 166.71, 164.74, 144.99, 138.98, 134.40, 130.97, 130.20, 129.24, 128.86, 128.28, 127.66, 127.42, 123.59, 64.15, 56.39, 52.13, 49.94; HRMS (ESI-TOF) Calcd for  $\text{C}_{26}\text{H}_{23}\text{N}_2\text{O}_6$   $[\text{M}+\text{H}]^+$ : 459.1551; found: 459.1554.

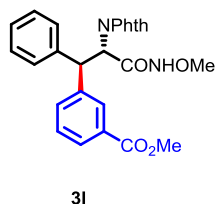

**Methyl 3-((1*R*, 2*S*)-2-(1,3-dioxoisindolin-2-yl)-3-(methoxyamino)-3-oxo-1-phenylpropyl) benzoate (**3l**)**

Substrate **2'** was arylated following the general arylation procedure. After purification by column chromatography using hexanes/EtOAc (2/1) as the eluent, **3l** was obtained as a white solid (37.8 mg, 83%). m.p. = 107-109 °C.  $^1\text{H}$  NMR (600 MHz,  $\text{CDCl}_3$ )  $\delta$  9.42 (s, 1H), 8.17 (s, 1H), 7.91 (d,  $J$  = 7.2 Hz, 1H), 7.75-7.72 (m, 3H), 7.67-7.64 (m, 2H), 7.42 (t,  $J$  = 7.8 Hz, 1H), 7.29 (d,  $J$  = 7.2 Hz, 2H), 7.15 (t,  $J$  = 7.2 Hz, 2H), 7.05 (t,  $J$  = 7.5 Hz, 1H), 5.59 (d,  $J$  = 12.6 Hz, 1H), 5.43 (d,  $J$  = 12.6 Hz, 1H), 3.89 (s, 3H), 3.49 (s, 3H);  $^{13}\text{C}$  NMR (150 MHz,  $\text{CDCl}_3$ )  $\delta$  167.87, 166.77, 164.72, 140.24, 139.15, 134.41, 132.88, 130.98, 130.69, 129.27, 129.11, 128.89, 128.76, 127.60, 127.38, 123.62, 64.18, 56.73, 52.21, 49.88; HRMS (ESI-TOF) Calcd for  $\text{C}_{26}\text{H}_{23}\text{N}_2\text{O}_6$   $[\text{M}+\text{H}]^+$ : 459.1551; found: 459.1550.

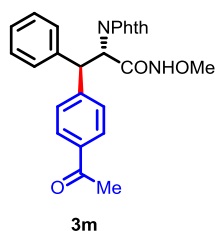

**(2*S*, 3*R*)-3-(4-Acetylphenyl)-2-(1,3-dioxoisindolin-2-yl)-*N*-methoxy-3-phenylpropanamide (**3m**)**



Substrate **2'** was arylated following the general arylation procedure. After purification by column chromatography using hexanes/EtOAc (2/1) as the eluent, **3m** was obtained as a white solid (24.3 mg, 55%). <sup>1</sup>H NMR (600 MHz, CDCl<sub>3</sub>) δ 9.44 (s, 1H), 7.92 (d, *J* = 8.4 Hz, 2H), 7.75-7.72 (m, 2H), 7.68-7.66 (m, 2H), 7.62 (d, *J* = 8.4 Hz, 2H), 7.29-7.27 (m, 2H), 7.14 (t, *J* = 7.2 Hz, 2H), 7.08-7.05 (m, 1H), 5.59 (d, *J* = 12.6 Hz, 1H), 5.41 (d, *J* = 12.6 Hz, 1H), 3.51 (s, 3H), 2.56 (s, 3H); <sup>13</sup>C NMR (151 MHz, CDCl<sub>3</sub>) δ 197.61, 167.86, 164.79, 145.08, 138.84, 136.17, 134.47, 130.93, 128.99, 128.90, 128.41, 127.61, 127.49, 123.65, 64.23, 56.51, 50.04, 26.60; HRMS (ESI-TOF) Calcd for C<sub>26</sub>H<sub>23</sub>N<sub>2</sub>O<sub>5</sub> [M+H]<sup>+</sup>: 443.1601; found: 443.1601.

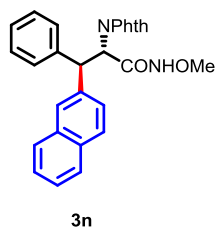

**(2*S*, 3*R*)-2-(1,3-Dioxoisindolin-2-yl)-*N*-methoxy-3-(naphthalen-2-yl)-3-phenyl propanamide (3n)**

Substrate **2'** was arylated following the general arylation procedure. After purification by column chromatography using hexanes/EtOAc (2/1) as the eluent, **3n** was obtained as a yellow solid (27.6 mg, 61%). <sup>1</sup>H NMR (600 MHz, CDCl<sub>3</sub>) δ 9.20 (s, 1H), 8.01 (s, 1H), 7.85-7.76 (m, 3H), 7.75-7.72 (m, 2H), 7.66-7.63 (m, 2H), 7.58 (dd, *J* = 8.4, 1.8 Hz, 1H), 7.47-7.43 (m, 2H), 7.33 (d, *J* = 7.8 Hz, 2H), 7.14 (t, *J* = 7.8 Hz, 2H), 7.04-7.01 (m, 1H), 5.71 (d, *J* = 12.6 Hz, 1H), 5.50 (d, *J* = 12.6 Hz, 1H), 3.39 (s, 3H); <sup>13</sup>C NMR (150 MHz, CDCl<sub>3</sub>) δ 167.96, 165.03, 139.69, 137.12, 134.32, 133.48, 132.63, 131.08, 128.92, 128.76, 127.95, 127.67, 127.60, 127.19, 126.87, 126.37, 126.14, 126.01, 123.58, 64.13, 56.74, 50.20; HRMS (ESI-TOF) Calcd for C<sub>28</sub>H<sub>23</sub>N<sub>2</sub>O<sub>4</sub> [M+H]<sup>+</sup>: 451.1652; found: 451.1651.

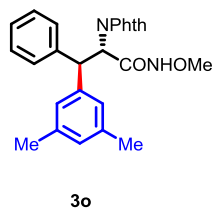

**(2*S*, 3*R*)-3-(3,5-Dimethylphenyl)-2-(1,3-dioxoisindolin-2-yl)-*N*-methoxy-3-phenylpropanamide (3o)**

Substrate **2'** was arylated following the general arylation procedure. After purification by column chromatography using hexanes/EtOAc (2/1) as the eluent, **3o** was obtained as a white solid (32.2 mg, 75%). m.p. = 108-110 °C. <sup>1</sup>H NMR (600 MHz, CDCl<sub>3</sub>) δ 8.91 (s, 1H), 7.73-7.71 (m, 2H), 7.65-7.63 (m, 2H), 7.27-7.25 (m, 2H), 7.14-7.11 (m, 4H), 7.03-7.01 (m, 1H), 6.87 (s, 1H), 5.55 (d, *J* = 12.6 Hz, 1H), 5.19 (d, *J* = 12.6 Hz, 1H), 3.52 (s, 3H), 2.29 (s, 6H); <sup>13</sup>C NMR (150 MHz, CDCl<sub>3</sub>) δ 167.90, 165.10, 140.05, 139.59, 138.70, 134.21, 131.14, 129.43, 128.67, 127.51, 127.02, 125.80, 123.50, 64.14, 56.74, 50.13, 21.38; HRMS (ESI-TOF) Calcd for C<sub>26</sub>H<sub>25</sub>N<sub>2</sub>O<sub>4</sub> [M+H]<sup>+</sup>: 429.1809; found: 429.1806.

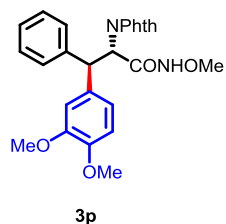

**(2*S*, 3*R*)-3-(3,4-Dimethoxyphenyl)-2-(1,3-dioxoisindolin-2-yl)-*N*-methoxy-3-phenylpropanamide (3p)**

Substrate **2'** was arylated following the general arylation procedure. After purification by column chromatography using hexanes/EtOAc (2/1) as the eluent, **3p** was obtained as a yellow solid (31.6 mg, 69%). <sup>1</sup>H NMR (600 MHz, CDCl<sub>3</sub>) δ 9.10 (s, 1H), 7.73-7.71 (m, 2H), 7.66-7.63 (m, 2H), 7.27-7.25 (m, 2H), 7.15-7.13 (m, 2H), 7.07 (dd, *J* = 8.1, 2.1 Hz, 1H), 7.05-7.02 (m, 1H), 6.98 (d, *J* = 2.4 Hz, 1H), 6.84 (d, *J* = 8.4 Hz, 1H), 5.51 (d, *J* = 12.6 Hz, 1H), 5.26 (d, *J* = 12.6 Hz, 1H), 3.89 (s, 3H), 3.83 (s, 3H), 3.53 (s, 3H); <sup>13</sup>C NMR (150 MHz, CDCl<sub>3</sub>) δ 167.92, 165.20, 149.21, 148.41, 140.054, 134.30, 132.21, 131.08, 128.73, 127.41, 127.11, 123.54, 119.95, 111.61,

111.52, 64.24, 56.94, 56.02, 55.85, 49.69; HRMS (ESI-TOF) Calcd for C<sub>26</sub>H<sub>25</sub>N<sub>2</sub>O<sub>6</sub> [M+H]<sup>+</sup>: 461.1707; found: 461.1708.

## Homo-diarylation of Alanine

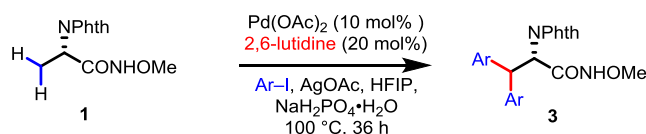

**General procedure:** The substrate **1** (0.1 mmol, 24.8 mg), Pd(OAc)<sub>2</sub> (0.01 mmol, 2.2 mg), NaH<sub>2</sub>PO<sub>4</sub>·H<sub>2</sub>O (0.3 mmol, 42 mg) and AgOAc (0.2 mmol, 33.4 mg) were weighed in air and placed in a sealed tube (10 mL) with a magnetic stir bar. To the reaction mixture, aryl iodide (0.3 mmol), 2,6-lutidine (0.2 mmol, 2 μL), HFIP (1 mL) were added. The reaction mixture was first stirred at room temperature for 10 min and then heated to 100 °C for 36 hours under vigorous stirring. Upon completion, the reaction mixture was cooled to room temperature, filtered with celite using DCM. The solvents were removed under reduced pressure and the resulting mixture was purified by a silica gel-packed flash chromatography column using hexanes/EtOAc (5/1 to 3/1 to 2/1) as the eluent.

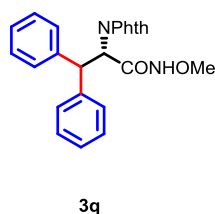

### (S)-2-(1,3-Dioxoisindolin-2-yl)-N-methoxy-3,3-diphenylpropanamide (**3q**)

Substrate **1** was arylated following the general arylation procedure. After purification by column chromatography using hexanes/EtOAc (2/1) as the eluent, **3q** was obtained as a white solid (26.7 mg, 67%). (For the NMR data, please see the previous one in section of Arylation of Methylene C–H Bonds)

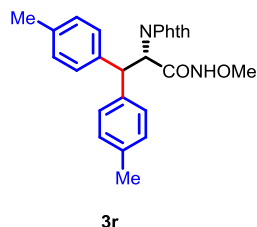

**(S)-2-(1,3-Dioxisoindolin-2-yl)-N-methoxy-3,3-di-p-tolylpropanamide (3r)**

Substrate **1** was arylated following the general arylation procedure. After purification by column chromatography using hexanes/EtOAc (2/1) as the eluent, **3r** was obtained as a white solid (26.8 mg, 63%). m.p. = 120-122 °C. <sup>1</sup>H NMR (600 MHz, CDCl<sub>3</sub>) δ 9.08 (s, 1H), 7.75-7.72 (m, 2H), 7.66-7.63 (m, 2H), 7.38 (d, *J* = 7.8 Hz, 2H), 7.14 (dd, *J* = 7.8, 1.8 Hz, 4H), 6.92 (d, *J* = 7.8 Hz, 2H), 5.53 (d, *J* = 12.6 Hz, 1H), 5.21 (d, *J* = 12.6 Hz, 1H), 3.51 (s, 3H), 2.28 (s, 3H), 2.12 (s, 3H); <sup>13</sup>C NMR (150 MHz, CDCl<sub>3</sub>) δ 167.94, 165.20, 137.24, 137.05, 137.00, 136.57, 134.23, 131.16, 129.78, 129.40, 127.89, 127.23, 123.54, 64.17, 57.01, 49.50, 21.03, 20.88; HRMS (ESI-TOF) Calcd for C<sub>26</sub>H<sub>25</sub>N<sub>2</sub>O<sub>4</sub> [M+H]<sup>+</sup>: 429.1809; found: 429.1803.

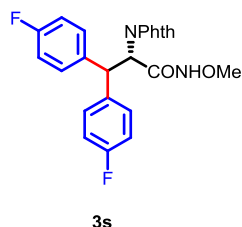

**(S)-2-(1,3-Dioxisoindolin-2-yl)-3,3-bis(4-fluorophenyl)-N-methoxypropanamide (3s)**

Substrate **1** was arylated following the general arylation procedure. After purification by column chromatography using hexanes/EtOAc (2/1) as the eluent, **3s** was obtained as a white solid (31.4 mg, 72%). m.p. = 102-104 °C. <sup>1</sup>H NMR (600 MHz, CDCl<sub>3</sub>) δ 9.33 (s, 1H), 7.75-7.72 (m, 2H), 7.69-7.67 (m, 2H), 7.47-7.45 (m, 2H), 7.23-7.21 (m, 2H), 7.03 (t, *J* = 8.4 Hz, 2H), 6.84 (t, *J* = 8.4 Hz, 2H), 5.45 (d, *J* = 12.6 Hz, 1H), 5.35 (d, *J* = 12.6 Hz, 1H), 3.51 (s, 3H); <sup>13</sup>C NMR (150 MHz, CDCl<sub>3</sub>) δ 167.86, 164.74, 162.07 (d, *J*<sub>FC</sub> = 245.4 Hz), 161.74 (d, *J*<sub>FC</sub> = 245.0 Hz), 135.40, 135.30, 134.53, 130.91, 129.75 (d, *J*<sub>FC</sub> = 8.0 Hz), 129.09 (d, *J*<sub>FC</sub> = 17.7 Hz), 123.68, 116.00-115.71, 64.21, 56.90, 48.56; HRMS (ESI-TOF) Calcd for C<sub>24</sub>H<sub>19</sub>F<sub>2</sub>N<sub>2</sub>O<sub>4</sub> [M+H]<sup>+</sup>: 437.1307; found: 437.1308.

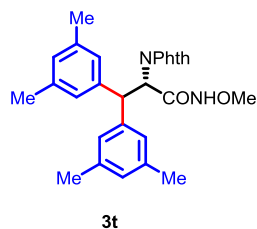

### (*S*)-3,3-Bis(3,5-Dimethylphenyl)-2-(1,3-dioxoisindolin-2-yl)-*N*-methoxypropanamide (**3t**)

Substrate **1** was arylated following the general arylation procedure. After purification by column chromatography using hexanes/EtOAc (2/1) as the eluent, **3t** was obtained as a white solid (34.4 mg, 75%). m.p. = 100-102 °C. <sup>1</sup>H NMR (600 MHz, CDCl<sub>3</sub>) δ 8.95 (s, 1H), 7.75-7.72 (m, 2H), 7.65-7.53 (m, 2H), 7.10 (s, 2H), 6.86 (s, 1H), 6.84 (s, 2H), 6.63 (s, 1H), 5.53 (d, *J* = 12.6 Hz, 1H), 5.10 (d, *J* = 12.6 Hz, 1H), 3.51 (s, 3H), 2.30 (s, 6H), 2.11 (s, 6H); <sup>13</sup>C NMR (150 MHz, CDCl<sub>3</sub>) δ 167.91, 165.22, 139.80, 139.76, 138.60, 137.99, 134.17, 131.26, 129.34, 128.71, 125.83, 125.26, 123.44, 64.09, 56.87, 49.97, 21.40, 21.21; HRMS (ESI-TOF) Calcd for C<sub>28</sub>H<sub>29</sub>N<sub>2</sub>O<sub>4</sub> [M+H]<sup>+</sup>: 457.2122; found: 457.2118.

### Hetero-diarylation of Alanine

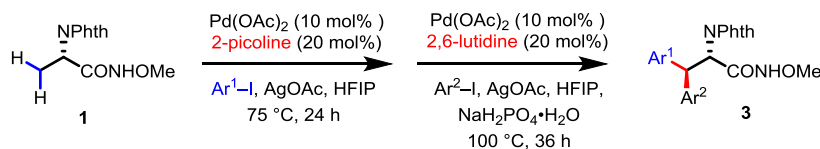

**General procedure:** The starting material **1** (0.1 mmol, 24.8 mg), Pd(OAc)<sub>2</sub> (10 mol%, 2.2 mg), and AgOAc (0.2 mmol, 33.4 mg) were weighed in air and placed in a sealed tube (10 mL) with a magnetic stir bar. To the reaction mixture, the first aryl iodide (0.12 mmol), 2-picoline (20 mol%, 2 μL), HFIP (1.0 mL) were added. The reaction mixture was first stirred at room temperature for 10 min and then heated to 75 °C for 24 hours under vigorous stirring. Upon completion, the reaction mixture was cooled to room temperature, to the reaction mixture, Pd(OAc)<sub>2</sub> (0.01 mmol, 2.2 mg), NaH<sub>2</sub>PO<sub>4</sub>·H<sub>2</sub>O (0.3 mmol, 42 mg), AgOAc (0.2 mmol, 33.4 mg), the second aryl iodide (0.3 mmol) and 2,6-lutidine (0.02 mmol, 2 μL), were added. The reaction mixture was first stirred at room temperature for 10 min and then heated to 100 °C for 36 hours under vigorous stirring. Upon completion, the reaction mixture was cooled to room temperature, filtered with celite using DCM. The solvents were removed under reduced pressure and the resulting mixture

was purified by a silica gel-packed flash chromatography column using hexanes/EtOAc (5/1 to 3/1 to 2/1) as the eluent.

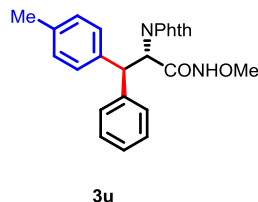

**(2S)-2-(1,3-Dioxoisindolin-2-yl)-N-methoxy-3-phenyl-3-(p-tolyl)propanamide (3u)**

Substrate **1** was arylated following the general arylation procedure. After purification by column chromatography using hexanes/EtOAc (2/1) as the eluent, **3u** was obtained as a white solid (29.4 mg, 71%). <sup>1</sup>H NMR (600 MHz, CDCl<sub>3</sub>) δ 9.07 (s, 1H), 7.75-7.73 (m, 2H), 7.67-7.65 (m, 2H), 7.50-7.49 (m, 2H), 7.33 (t, *J* = 7.8 Hz, 2H), 7.23 (t, *J* = 7.2 Hz, 1H), 7.15 (d, *J* = 7.8 Hz, 2H), 6.94 (d, *J* = 7.8 Hz, 2H), 5.54 (d, *J* = 12.6 Hz, 1H), 5.27 (d, *J* = 12.6 Hz, 1H), 3.47 (s, 3H), 2.13 (s, 3H); <sup>13</sup>C NMR (150 MHz, CDCl<sub>3</sub>) δ 167.93, 165.08, 140.01, 136.75, 136.71, 134.28, 131.14, 129.45, 129.06, 128.10, 127.55, 127.31, 123.59, 64.14, 57.02, 49.81, 20.90; HRMS (ESI-TOF) Calcd for C<sub>25</sub>H<sub>23</sub>N<sub>2</sub>O<sub>4</sub> [M+H]<sup>+</sup>: 415.1652; found: 415.1656.

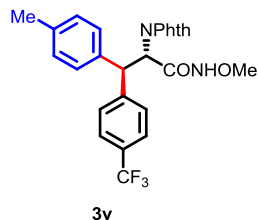

**(2S)-2-(1,3-Dioxoisindolin-2-yl)-N-methoxy-3-(p-tolyl)-3-(4-(trifluoromethyl)phenyl)propanamide (3v)**

Substrate **1** was arylated following the general arylation procedure. After purification by column chromatography using hexanes/EtOAc (2/1) as the eluent, **3v** was obtained as a white solid (23.1 mg, 48%). m.p. = 111-113 °C. <sup>1</sup>H NMR (600 MHz, CDCl<sub>3</sub>) δ 9.35 (s, 1H), 7.77-7.74 (m, 2H), 7.69-7.67 (m, 2H), 7.62-7.59 (m, 2H), 7.13 (d, *J* = 7.8 Hz, 2H), 6.96 (d, *J* = 7.8 Hz, 2H), 5.54 (d, *J* = 12.6 Hz, 1H), 5.37 (d, *J* = 12.6 Hz, 1H), 3.50 (s, 3H), 2.14 (s, 3H); <sup>13</sup>C NMR (150 MHz, CDCl<sub>3</sub>) δ 167.89, 164.82, 144.04, 137.24, 135.74, 134.48, 130.98, 129.96-129.30, 129.66,

128.53, 127.37, 125.85-125.83, 123.97 (q,  $J_{\text{FC}} = 270.5$  Hz), 123.71, 64.21, 56.69, 49.50, 20.91; HRMS (ESI-TOF) Calcd for  $\text{C}_{26}\text{H}_{22}\text{F}_3\text{N}_2\text{O}_4$   $[\text{M}+\text{H}]^+$ : 483.1526; found 483.1523.

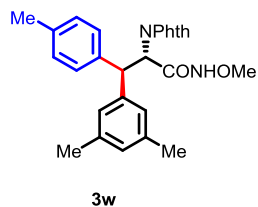

**(2S)-3-(3,5-Dimethylphenyl)-2-(1,3-dioxoisindolin-2-yl)-N-methoxy-3-(p-tolyl)propanamide (3w)**

Substrate **1** was arylated following the general arylation procedure. After purification by column chromatography using hexanes/EtOAc (2/1) as the eluent, **3w** was obtained as a white solid (29.9 mg, 67%).  $^1\text{H}$  NMR (600 MHz,  $\text{CDCl}_3$ )  $\delta$  8.88 (s, 1H), 7.74-7.72 (m, 2H), 7.66-7.63 (m, 2H), 7.14 (d,  $J = 8.4$ , 2H), 7.10 (s, 2H), 6.92 (d,  $J = 8.4$  Hz, 2H), 6.86 (s, 1H), 5.53 (d,  $J = 12.6$  Hz, 1H), 5.16 (d,  $J = 12.6$  Hz, 1H), 3.51 (s, 3H), 2.28 (s, 6H), 2.13 (s, 3H);  $^{13}\text{C}$  NMR (150 MHz,  $\text{CDCl}_3$ )  $\delta$  167.92, 165.18, 139.89, 138.66, 137.04, 136.56, 134.18, 131.22, 129.39, 129.34, 127.29, 125.74, 123.53, 64.12, 56.81, 49.73, 21.38, 20.90; HRMS (ESI-TOF) Calcd for  $\text{C}_{27}\text{H}_{27}\text{N}_2\text{O}_4$   $[\text{M}+\text{H}]^+$ : 443.1965; found: 443.1962.

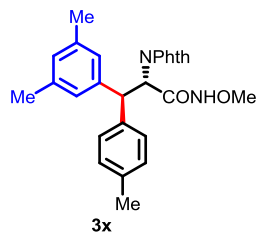

**(2S)-3-(3,5-Dimethylphenyl)-2-(1,3-dioxoisindolin-2-yl)-N-methoxy-3-(p-tolyl)propanamide (3x)**

Substrate **1** was arylated following the general arylation procedure. After purification by column chromatography using hexanes/EtOAc (2/1) as the eluent, **3x** was obtained as a white solid (22.5 mg, 51%).  $^1\text{H}$  NMR (600 MHz,  $\text{CDCl}_3$ )  $\delta$  9.08 (s, 1H), 7.76-7.73 (m, 2H), 7.67-7.64 (m, 2H), 7.38 (d,  $J = 7.8$  Hz, 2H), 7.14 (d,  $J = 7.8$  Hz, 2H), 6.84 (s, 2H), 6.63 (s, 1H), 5.53 (d,  $J = 12.6$  Hz,

1H), 5.13 (d,  $J = 12.6$  Hz, 1H), 3.51 (s, 3H), 2.29 (s, 3H), 2.10 (s, 6H);  $^{13}\text{C}$  NMR (150 MHz,  $\text{CDCl}_3$ )  $\delta$  167.98, 165.25, 139.81, 138.03, 137.25, 136.85, 134.22, 131.22, 129.77, 128.70, 127.97, 125.20, 123.48, 64.17, 57.14, 49.81, 21.19, 21.05; HRMS (ESI-TOF) Calcd for  $\text{C}_{27}\text{H}_{27}\text{N}_2\text{O}_4$   $[\text{M}+\text{H}]^+$ : 443.1965; found: 443.1962.

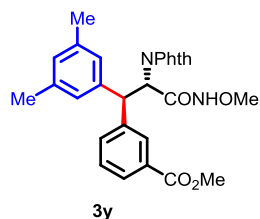

**Methyl 3-((2*S*)-1-(3,5-dimethylphenyl)-2-(1,3-dioxoisindolin-2-yl)-3-(methoxyamino)-3-oxopropyl)benzoate (**3y**)**

Substrate **1** was arylated following the general arylation procedure. After purification by column chromatography using hexanes/EtOAc (2/1) as the eluent, **3y** was obtained as a white solid (23.2 mg, 48%).  $^1\text{H}$  NMR (600 MHz,  $\text{CDCl}_3$ )  $\delta$  9.39 (s, 1H), 8.15 (s, 1H), 7.92-7.90 (m, 1H), 7.76-7.73 (m, 3H), 7.69-7.66 (m, 2H), 7.42 (t,  $J = 7.8$  Hz, 1H), 6.86 (s, 2H), 6.66 (s, 1H), 5.56 (d,  $J = 12.6$  Hz, 1H), 5.29 (d,  $J = 12.6$  Hz, 1H), 3.91 (s, 3H), 3.48 (s, 3H), 2.12 (s, 6H);  $^{13}\text{C}$  NMR (150 MHz,  $\text{CDCl}_3$ )  $\delta$  167.94, 166.82, 164.85, 140.35, 138.91, 138.29, 134.38, 132.77, 131.09, 130.62, 129.39, 129.05, 128.67, 125.32, 123.58, 64.16, 56.96, 52.20, 49.81, 21.19; HRMS (ESI-TOF) Calcd for  $\text{C}_{28}\text{H}_{27}\text{N}_2\text{O}_6$   $[\text{M}+\text{H}]^+$ : 487.1864; found: 487.1862.

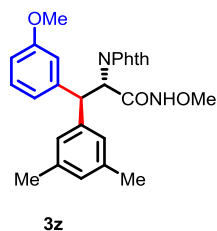

**(2*S*,2*S*)-3-(3,5-Dimethylphenyl)-2-(1,3-dioxoisindolin-2-yl)-*N*-methoxy-3-(3-methoxyphenyl) propanamide (**3z**)**



Substrate **1** was arylated following the general arylation procedure. After purification by column chromatography using hexanes/EtOAc (2/1) as the eluent, **3z** was obtained as a white solid (25.1 mg, 55%). <sup>1</sup>H NMR (600 MHz, CDCl<sub>3</sub>) δ 8.88 (s, 1H), 7.77-7.73 (m, 2H), 7.67-7.64 (m, 2H), 7.10 (s, 2H), 7.04 (t, *J* = 8.1 Hz, 1H), 6.88 (s, 1H), 6.85 (d, *J* = 7.8 Hz, 1H), 6.80 (t, *J* = 1.8 Hz, 1H), 6.57 (dd, *J* = 8.4, 2.4 Hz, 1H), 5.54 (d, *J* = 12.6 Hz, 1H), 5.15 (d, *J* = 12.6 Hz, 1H), 3.67 (s, 3H), 3.52 (s, 3H), 2.30 (s, 6H); <sup>13</sup>C NMR (150 MHz, CDCl<sub>3</sub>) δ 167.94, 165.07, 159.54, 141.54, 139.46, 138.70, 134.25, 131.21, 129.67, 129.49, 125.79, 123.56, 119.73, 113.07, 112.76, 64.16, 56.73, 55.10, 50.12, 21.40; HRMS (ESI-TOF) Calcd for C<sub>27</sub>H<sub>27</sub>N<sub>2</sub>O<sub>5</sub> [M+H]<sup>+</sup>: 459.1914; found: 459.1917.

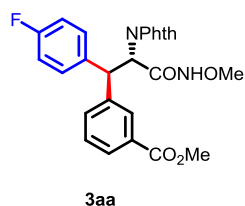

**Methyl 3-((2*S*)-2-(1,3-dioxoisindolin-2-yl)-1-(4-fluorophenyl)-3-(methoxyamino)-3-oxopropyl) benzoate (3aa)**

Substrate **1** was arylated following the general arylation procedure. After purification by column chromatography using hexanes/EtOAc (2/1) as the eluent, **3aa** was obtained as a white solid (25.1 mg, 53%). <sup>1</sup>H NMR (600 MHz, CDCl<sub>3</sub>) δ 9.33 (s, 1H), 8.14 (s, 1H), 7.93 (d, *J* = 7.2 Hz, 1H), 7.77-7.74 (m, 2H), 7.77-7.68 (m, 3H), 7.43 (t, *J* = 7.8 Hz, 1H), 7.27-7.25 (m, 2H), 6.84 (t, *J* = 8.4 Hz, 2H), 5.53 (d, *J* = 12.6 Hz, 1H), 5.43 (d, *J* = 12.6 Hz, 1H), 3.91 (s, 3H), 3.49 (s, 3H); <sup>13</sup>C NMR (150 MHz, CDCl<sub>3</sub>) δ 167.85, 166.70, 164.54, 161.80 (d, *J*<sub>FC</sub> = 245.0 Hz), 140.02, 135.02, 134.55, 132.75, 130.85 (d, *J*<sub>FC</sub> = 17.3 Hz), 129.25, 129.19, 129.11, 128.87, 123.71, 115.86 (d, *J*<sub>FC</sub> = 21.3 Hz), 64.21, 56.70, 52.26, 49.09; HRMS (ESI-TOF) Calcd for C<sub>26</sub>H<sub>22</sub>FN<sub>2</sub>O<sub>6</sub> [M+H]<sup>+</sup>: 477.1456; found: 477.1459.

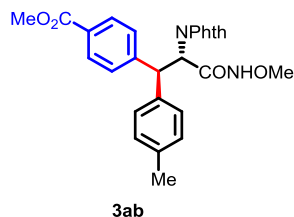

**Methyl 4-((2*S*)-2-(1,3-dioxoisindolin-2-yl)-3-(methoxyamino)-3-oxo-1-(*p*-tolyl)propyl)benzoate (**3ab**)**

Substrate **1** was arylated following the general arylation procedure. After purification by column chromatography using hexanes/EtOAc (2/1) as the eluent, **3ab** was obtained as a white solid (22.3 mg, 47%). <sup>1</sup>H NMR (600 MHz, CDCl<sub>3</sub>) δ 8.99 (s, 1H), 7.81 (d, *J* = 8.4 Hz, 2H), 7.74-7.71 (m, 2H), 7.67-7.65 (m, 2H), 7.38 (d, *J* = 7.8 Hz, 2H), 7.35 (d, *J* = 8.4 Hz, 2H), 7.15 (d, *J* = 7.8 Hz, 2H), 5.55 (d, *J* = 12.6 Hz, 1H), 5.37 (d, *J* = 12.6 Hz, 1H), 3.79 (s, 3H), 3.52 (s, 3H), 2.30 (s, 3H); <sup>13</sup>C NMR (150 MHz, CDCl<sub>3</sub>) δ 167.86, 166.64, 164.78, 145.32, 137.77, 135.91, 134.43, 130.98, 130.08, 129.97, 128.91, 127.98, 127.55, 123.67, 64.24, 56.50, 52.02, 49.76, 21.05; HRMS (ESI-TOF) Calcd for C<sub>27</sub>H<sub>25</sub>N<sub>2</sub>O<sub>6</sub> [M+H]<sup>+</sup>: 473.1707; found: 473.1710.

**Arylation of Other Carboxylic Acid:**

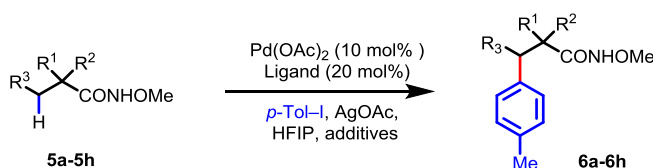

**General procedure for arylation with aryl iodides:**

**Method A:** The starting material (0.2 mmol), Pd(OAc)<sub>2</sub> (10 mol%, 4.4 mg), and AgOAc (0.4 mmol, 66.8 mg) were weighed in air and placed in a sealed tube (10 mL) with a magnetic stir bar. To the reaction mixture, aryl iodide (0.3 mmol), 2-picoline (20 mol%, 4 μL), HFIP (2.0 mL) were added. The reaction mixture was first stirred at room temperature for 10 min and then heated to 75 °C for 24 hours under vigorous stirring. Upon completion, the reaction mixture was cooled to room temperature, filtered with celite using DCM. The solvents were removed under

reduced pressure and the resulting mixture was purified by a silica gel-packed flash chromatography column.

**Method B:** The substrate (0.1 mmol), Pd(OAc)<sub>2</sub> (0.01 mmol, 2.2 mg), NaH<sub>2</sub>PO<sub>4</sub>•H<sub>2</sub>O (0.3 mmol, 42 mg) and AgOAc (0.2 mmol, 33.4 mg) were weighed in air and placed in a sealed tube (10 mL) with a magnetic stir bar. To the reaction mixture, aryl iodide (0.3 mmol), 2,6-lutidine (0.02 mmol, 2 μL), HFIP (1 mL) were added. The reaction mixture was first stirred at room temperature for 10 min and then heated to 100 °C for 36 hours under vigorous stirring. Upon completion, the reaction mixture was cooled to room temperature, filtered with celite using DCM. The solvents were removed under reduced pressure and the resulting mixture was purified by a silica gel-packed flash chromatography column using.

**Method C:** The substrate (0.1 mmol, 24.8 mg), Pd(OAc)<sub>2</sub> (0.015 mmol, 3.3 mg) and AgOAc (0.2 mmol, 33.4 mg) were weighed in air and placed in a sealed tube (10 mL) with a magnetic stir bar. To the reaction mixture, aryl iodide (0.3 mmol), **L1** (0.03 mmol, 8.1 mg), TFA (2 μL) and DCE (1 mL) were added. The reaction mixture was first stirred at room temperature for 10 min and then heated to 90 °C for 36 hours under vigorous stirring. Upon completion, the reaction mixture was cooled to room temperature, filtered with celite using DCM. The solvents were removed under reduced pressure and the resulting mixture was purified by a silica gel-packed flash chromatography column.

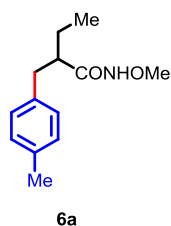

#### ***N*-Methoxy-2-(4-methylbenzyl)butanamide (6a)**

Substrate **5a** was arylated following the general arylation procedure of Method A. After purification by column chromatography using hexanes/EtOAc (2/1) as the eluent, **6a** was obtained as a white solid (26.5 mg, 60%). <sup>1</sup>H NMR (600 MHz, CDCl<sub>3</sub>) δ 7.99 (s, 1H), 7.08-7.05 (m, 4H), 3.58 (s, 3H), 2.87 (dd, *J* = 13.2, 9.6 Hz, 1H), 2.71 (dd, *J* = 13.2, 5.4 Hz, 1H), 2.32 (s, 3H), 2.01-2.00 (m, 1H), 1.78-1.74 (m, 1H), 1.57-1.53 (m, 1H), 0.93 (t, *J* = 7.4 Hz, 3H); <sup>13</sup>C

NMR (150 MHz, CDCl<sub>3</sub>)  $\delta$  172.78, 136.35, 135.91, 129.15, 128.80, 64.32, 48.72, 38.43, 25.46, 21.02, 11.96; HRMS (ESI-TOF) Calcd for C<sub>13</sub>H<sub>20</sub>NO<sub>2</sub> [M+H]<sup>+</sup>: 222.1489; found: 222.1489.

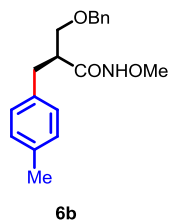

**(S)-O-(3-(Benzyloxy)-2-(4-methylbenzyl)-112-propyl)-N-methoxyhydroxylamine (6b)**

Substrate **5b** was arylated following the general arylation procedure of **Method A**. After purification by column chromatography using hexanes/EtOAc (2/1) as the eluent, **6b** was obtained as a white solid (16.6 mg, 53%). <sup>1</sup>H NMR (600 MHz, CDCl<sub>3</sub>)  $\delta$  8.47 (s, 1H), 7.36-7.29 (m, mH), 7.10-7.04 (m, 4H), 4.51-4.46 (m, 2H), 3.65 (s, 3H), 3.59-3.53 (m, 2H), 2.97 (dd, *J* = 13.6, 7.8 Hz, 1H), 2.73 (dd, *J* = 13.6, 7.5 Hz, 1H), 2.54 (m, 1H), 2.31 (s, 3H).; <sup>13</sup>C NMR (150 MHz, CDCl<sub>3</sub>)  $\delta$  171.75, 137.50, 136.08, 135.54, 129.23, 128.83, 128.53, 127.95, 127.81, 73.53, 69.66, 64.32, 47.16, 34.17, 21.03; HRMS (ESI-TOF) Calcd for C<sub>19</sub>H<sub>24</sub>NO<sub>3</sub> [M+H]<sup>+</sup>: 314.1751; found: 314.1747.

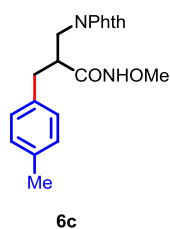

**2-(3-((Methoxyamino)oxy)-2-(4-methylbenzyl)-312-propyl)isoindoline-1,3-dione (6c)**

Substrate **5c** was arylated following the general arylation procedure of **Method A**. After purification by column chromatography using hexanes/EtOAc (2/1) as the eluent, **6c** was obtained as a white solid (25.3 mg, 72%). <sup>1</sup>H NMR (600 MHz, CDCl<sub>3</sub>)  $\delta$  8.18 (s, 1H), 7.82-7.81 (m, 2H), 7.71-7.70 (m, 2H), 7.06-7.01 (m, 4H), 4.00 (dd, *J* = 14.4, 7.8 Hz, 1H), 3.87 (dd, *J* =

14.4, 7.2 Hz, 1H), 3.49 (s, 3H), 3.03-2.99 (m, 1H), 2.91-2.86 (m, 1H), 2.79 (dd,  $J = 13.2, 5.4$  Hz, 1H), 2.24 (s, 3H);  $^{13}\text{C}$  NMR (150 MHz,  $\text{CDCl}_3$ )  $\delta$  169.83, 168.18, 136.22, 134.90, 134.13, 131.78, 129.24, 128.74, 123.38, 64.21, 44.78, 39.88, 35.96, 20.97; HRMS (ESI-TOF) Calcd for  $\text{C}_{20}\text{H}_{21}\text{N}_2\text{O}_4$   $[\text{M}+\text{H}]^+$ : 353.1496; found: 353.1493.

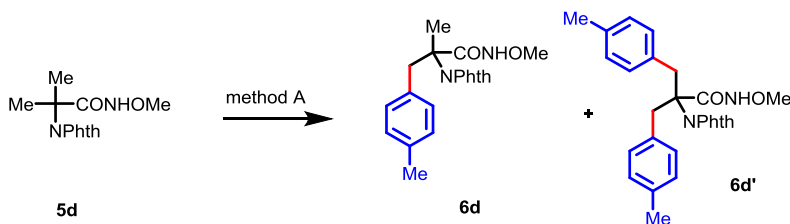

**2-(1,3-Dioxoisindolin-2-yl)-*N*-methoxy-2-methyl-3-(*p*-tolyl)propanamide (6d)**

**2-(1,3-Dioxoisindolin-2-yl)-*N*-methoxy-2-(4-methylbenzyl)-3-(*p*-tolyl)propanamide (6d')**

Substrate **5d** was arylated following the general arylation procedure of **Method A**. After purification by column chromatography using hexanes/EtOAc (2/1) as the eluent, **6d** was obtained as a white solid (20.3 mg, 29%).  $^1\text{H}$  NMR (600 MHz,  $\text{CDCl}_3$ )  $\delta$  8.42 (s, 1H), 7.78-7.75 (m, 2H), 7.77-7.69 (m, 2H), 7.02-6.93 (m, 4H), 3.79 (d,  $J = 13.2$  Hz, 1H), 3.75 (s, 3H), 3.25 (d,  $J = 13.2$  Hz, 1H), 2.26 (s, 3H), 1.83 (s, 3H);  $^{13}\text{C}$  NMR (150 MHz,  $\text{CDCl}_3$ )  $\delta$  170.76, 168.57, 136.80, 134.23, 131.79, 135.53, 130.50, 128.98, 123.22, 64.26, 64.15, 40.24, 21.84, 21.05; HRMS (ESI-TOF) Calcd for  $\text{C}_{20}\text{H}_{21}\text{N}_2\text{O}_4$   $[\text{M}+\text{H}]^+$ : 353.1496; found: 353.1497. **6d'** was obtained as a white solid (30.4 mg, 35%).  $^1\text{H}$  NMR (600 MHz,  $\text{CDCl}_3$ )  $\delta$  8.09 (s, 1H), 7.72-7.67 (m, 4H), 7.15-7.14 (m, 4H), 7.05-7.02 (m, 4H), 3.71 (d,  $J = 13.8$  Hz, 2H), 3.65 (s, 3H), 3.44 (d,  $J = 13.8$  Hz, 2H), 2.27 (s, 6H);  $^{13}\text{C}$  NMR (150 MHz,  $\text{CDCl}_3$ )  $\delta$  169.24, 168.70, 136.92, 134.09, 131.83, 131.39, 130.71, 129.12, 123.14, 68.86, 63.97, 37.47, 21.05; HRMS (ESI-TOF) Calcd for  $\text{C}_{27}\text{H}_{27}\text{N}_2\text{O}_4$   $[\text{M}+\text{H}]^+$ : 443.1965; found: 443.1963.

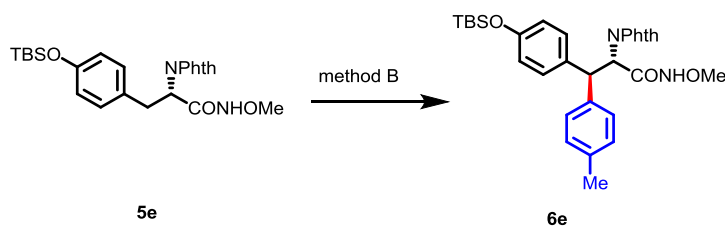

**(2*S*, 3*S*)-3-(4-((*Tert*-butyldimethylsilyl)oxy)phenyl)-2-(1,3-dioxoisindolin-2-yl)-*N*-methoxy-3-(*p*-tolyl)propanamide (6e)**

Substrate **5e** was arylated following the general arylation procedure of **Method B**. After purification by column chromatography using hexanes/EtOAc (2/1) as the eluent, **6e** was obtained as a white solid (31.6 mg, 58%). <sup>1</sup>H NMR (600 MHz, CDCl<sub>3</sub>) δ 9.15 (s, 1H), 7.73-7.71(m, 2H), 7.66-7.63 (m, 2H), 7.42-7.40(m, 2H), 7.15 (d, *J* = 7.8 Hz, 2H), 7.09 (d, *J* = 8.4 Hz, 2H), 6.58-6.56 (m, 2H), 5.49 (d, *J* = 12.6 Hz, 1H), 5.12 (d, *J* = 12.6 Hz, 1H), 3.53 (s, 3H), 2.30 (s, 3H), 0.82 (s, 9H), -0.031 (s, 3H), -0.034 (s, 3H); <sup>13</sup>C NMR (150 MHz, CDCl<sub>3</sub>) δ 167.92, 165.20, 154.47, 137.26, 136.84, 134.24, 132.82, 131.09, 129.76, 128.53, 127.90, 123.50, 120.31, 64.19, 57.30, 49.36, 25.55, 21.05, 18.08, -4.62; HRMS (ESI-TOF) Calcd for C<sub>31</sub>H<sub>37</sub>N<sub>2</sub>O<sub>5</sub>Si [M+H]<sup>+</sup>: 545.2466; found: 545.2464.

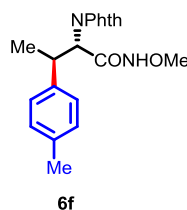

**(2*S*, 3*R*)-2-(1,3-Dioxoisindolin-2-yl)-*N*-methoxy-3-(*p*-tolyl)butanamide (6f)**

Substrate **5f** was arylated following the general arylation procedure of **Method B**. After purification by column chromatography using hexanes/EtOAc (2/1) as the eluent, **6f** was obtained as a white solid (19.2 mg, 55%). m.p. = 152-154 °C. <sup>1</sup>H NMR (600 MHz, CDCl<sub>3</sub>) δ 8.86 (s, 1H), 7.91-7.88 (m, 2H), 7.79-7.76 (m, 2H), 7.28 (d, *J* = 7.8 Hz, 2H), 7.18 (d, *J* = 7.8 Hz, 2H), 4.86 (d, *J* = 12.0 Hz, 1H), 3.98-3.97 (m, 1H), 3.48 (s, 3H), 2.34 (s, 3H), 1.20 (d, *J* = 6.6 Hz, 3H); <sup>13</sup>C NMR (150 MHz, CDCl<sub>3</sub>) δ 168.26, 165.34, 138.59, 137.34, 134.50, 131.42, 129.75, 127.57, 123.76, 64.12, 59.55, 38.44, 21.09, 19.74; HRMS (ESI-TOF) Calcd for C<sub>20</sub>H<sub>21</sub>N<sub>2</sub>O<sub>4</sub> [M+H]<sup>+</sup>: 353.1496; found: 353.1495.

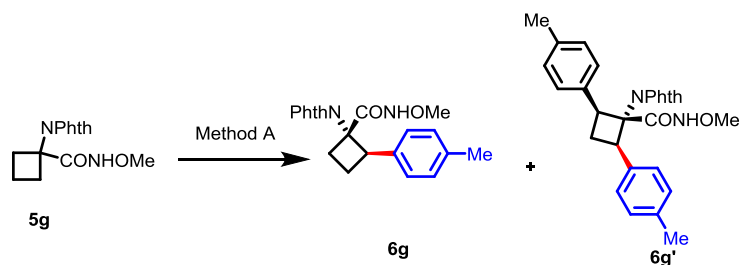

**(1*S*, 2*R*)-1-(1,3-Dioxoisindolin-2-yl)-*N*-methoxy-2-(*p*-tolyl)cyclobutane-1-carboxamide (6g)**

**(1*S*, 2*R*)-1-(1,3-Dioxoisindolin-2-yl)-*N*-methoxy-2,4-di-*p*-tolylcyclobutane-1-carboxamide (6g')**

Substrate **5g** was arylated following the general arylation procedure of Method A. After purification by column chromatography using hexanes/EtOAc (2/1) as the eluent, **6g** was obtained as a white solid (16.8 mg, 23%). m.p. = 209-211 °C.  $^1\text{H}$  NMR (600 MHz,  $\text{CDCl}_3$ )  $\delta$  7.96 (s, 1H), 7.86-7.83 (m, 2H), 7.77-7.74 (m, 2H), 7.42 (d,  $J$  = 8.4 Hz, 2H), 7.17 (d,  $J$  = 7.8 Hz, 2H), 4.48 (t,  $J$  = 10.2 Hz, 1H), 3.39-3.36 (m, 4H), 2.56-2.49 (m, 1H), 2.43-2.36 (m, 1H), 2.33 (s, 3H), 2.32-2.26 (m, 1H).  $^{13}\text{C}$  NMR (150 MHz,  $\text{CDCl}_3$ )  $\delta$  167.90, 167.85, 137.23, 135.37, 134.45, 131.69, 129.13, 128.76, 123.45, 65.49, 63.98, 47.41, 27.98, 23.56, 21.10; HRMS (ESI-TOF) Calcd for  $\text{C}_{21}\text{H}_{21}\text{N}_2\text{O}_4$   $[\text{M}+\text{H}]^+$ : 365.1496; found: 365.1491. **6g'** was obtained as a white solid (57.3 mg, 63%).  $^1\text{H}$  NMR (600 MHz,  $\text{CDCl}_3$ )  $\delta$  7.92 (s, 1H), 7.88-7.85 (m, 2H), 7.77-7.74 (m, 2H), 7.38 (d,  $J$  = 8.4 Hz, 4H), 7.15 (d,  $J$  = 7.8 Hz, 4H), 4.85-4.82 (m, 2H), 3.28 (s, 3H), 3.03-2.97 (m, 1H), 2.63-2.59 (m, 1H), 2.33 (s, 6H);  $^{13}\text{C}$  NMR (150 MHz,  $\text{CDCl}_3$ )  $\delta$  168.65, 165.86, 136.99, 134.60, 134.41, 131.63, 128.89, 128.61, 123.46, 71.61, 63.78, 44.41, 25.91, 21.11; HRMS (ESI-TOF) Calcd for  $\text{C}_{28}\text{H}_{27}\text{N}_2\text{O}_4$   $[\text{M}+\text{H}]^+$ : 455.1965; found: 455.1962.

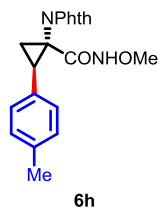

## 2-((1*S*, 2*R*)-1-(((Methoxyamino)oxy)-12-methyl)-2-(*p*-tolyl)cyclopropyl)isoindoline-1,3-dione (6h)

Substrate **5h** was arylated following the general arylation procedure of Method C. After purification by column chromatography using hexanes/EtOAc (2/1) as the eluent, **6h** was obtained as a white solid 15.8 mg (45%). m.p. = 203-206 °C. <sup>1</sup>H NMR (600 MHz, CDCl<sub>3</sub>) δ 8.29 (s, 1H), 7.927.89 (m, 2H), 7.80-7.77 (m, 2H), 7.38 (d, *J* = 7.8 Hz, 2H), 7.17 (d, *J* = 7.8 Hz, 2H), 3.26 (s, 3H), 2.84 (t, *J* = 9.6 Hz, 1H), 2.50 (dd, *J* = 8.4, 6.6 Hz, 1H), 2.33 (s, 3H), 1.83 (dd, *J* = 9.6, 7.2 Hz, 1H); <sup>13</sup>C NMR (150 MHz, CDCl<sub>3</sub>) δ 168.30, 164.66, 137.40, 134.67, 131.41, 130.80, 129.21, 128.90, 123.76, 63.96, 38.50, 32.19, 21.15, 16.14; HRMS (ESI-TOF) Calcd for C<sub>20</sub>H<sub>19</sub>N<sub>2</sub>O<sub>4</sub> [M+H]<sup>+</sup>: 351.1339; found: 351.1339

## Gram-Scale Synthesis of Unnatural Amino Acids

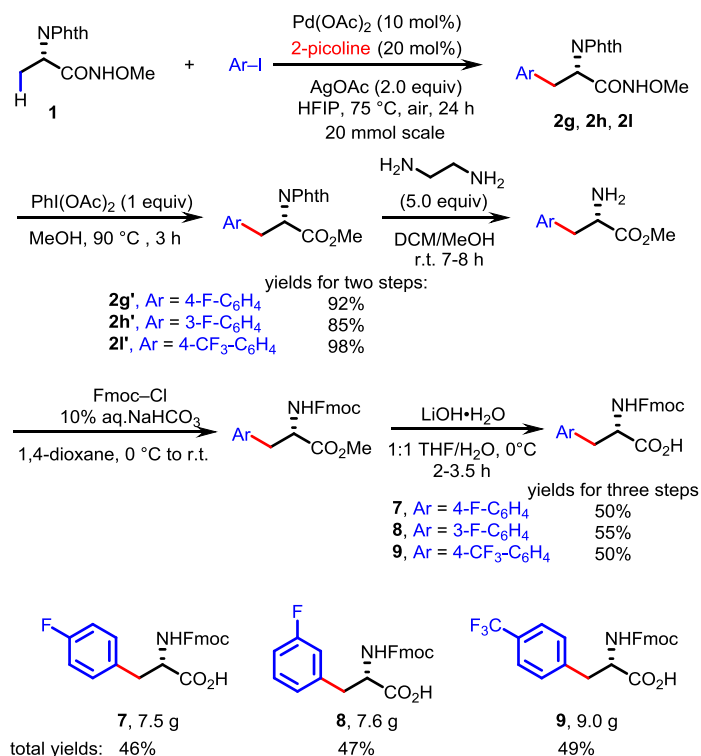

## General procedure for scale up synthesis of unnatural amino acid

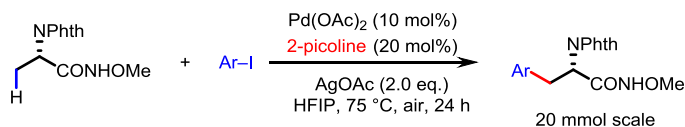



The starting material (20.0 mmol, 4.96 g), Pd(OAc)<sub>2</sub> (3.0 mmol, 674 mg), and AgOAc (40.0 mmol, 6.68 g) were weighed in air and placed in a sealed tube (350 mL) with a magnetic stir bar. To the reaction mixture, aryl iodide (30 mmol), 2-picoline (6.00 mmol, 0.6 mL), and HFIP (150 mL) were added. The reaction mixture was first stirred at room temperature for 10 min and then heated to 90 °C for 36 hours under vigorous stirring. Upon completion, the reaction mixture was cooled to room temperature, and HFIP was recovered by distillation. The residue was filtered with DCM and concentrated as crude product.

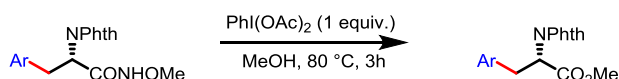

The above crude product substrate was dissolved in MeOH (120 mL), followed by the addition of PhI(OAc)<sub>2</sub> (20 mmol, 6.44 g). The reaction mixture was heated to 80 °C for 3 hours. The reaction mixture was then cooled to room temperature and then saturated aq. Na<sub>2</sub>SO<sub>3</sub> and saturated aq. NaHCO<sub>3</sub> were added. The aqueous layer was then extracted with EtOAc and the combined organic layers washed with brine, dried over MgSO<sub>4</sub>, filtered and concentrated. Purified by column chromatography (hexanes/ EtOAc = 2/1) to provide product.

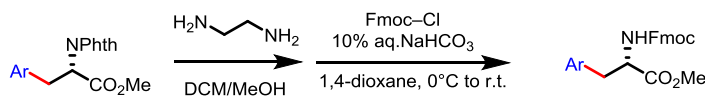

The substrate (5 mmol) was dissolved in a 1:1 mixture of DCM/MeOH (50 mL total), and ethylenediamine (5-6 equiv.) was added. The reaction mixture was heated to 40 °C for 3 h, and then cooled to room temperature. The reaction mixture was stirred at room temperature for 7 h (monitored by TLC). Then reaction mixture (with solvent) was transferred to a column with silica gel directly and purified by column chromatography (DCM/MeOH = 10/1). Crude product was obtained as oil (yield 85-95%) and used directly for next step. Amino ester was dissolved in 1,4-dioxane, and 10% aq. NaHCO<sub>3</sub> was added. The mixture was cooled to 0 °C and Fmoc-Cl (1.2 equiv) was added. The ice bath was allowed to warm to room temperature overnight, after which H<sub>2</sub>O and EtOAc was added to the reaction mixture. The aqueous layer was then extracted with EtOAc twice and the combined organic layers were washed with brine, dried over MgSO<sub>4</sub>, filtered and concentrated. Purify by column chromatography (hexanes/EtOAc = 3/1 to 2/1).

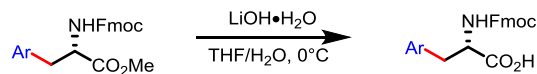

The substrate was dissolved in THF. The solution was cooled to 0 °C, and a cold solution of LiOH·H<sub>2</sub>O (2 equiv) in H<sub>2</sub>O were added. The reaction was maintained at 0 °C for 1 hour. The reaction was acidified with 2N HCl and extracted with EtOAc. The combined organic layers were dried over MgSO<sub>4</sub>, and concentrated. The residue was purified by column chromatography (hexanes/EtOAc/AcOH= 10/10/1).

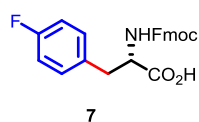

**(S)-2-((((9H-Fluoren-9-yl)methoxy)carbonyl)amino)-3-(4-fluorophenyl)propanoic acid (7)**

Total yield (46%), white solid (7.5 g). m.p. = 162-165 °C. <sup>1</sup>H NMR (600 MHz, Acetone *d*-6) δ 7.85 (d, *J* = 7.8 Hz, 2H), 7.65 (t, *J* = 7.8 Hz, 2H), 7.40 (t, *J* = 7.8 Hz, 2H), 7.35-7.29 (m, 4H), 7.04 (t, *J* = 9.0 Hz, 2H), 4.49 (dd, *J* = 9.0, 4.8 Hz, 1H), 4.32-4.25 (m, 2H), 4.19 (t, *J* = 7.8 Hz, 1H), 3.24 (dd, *J* = 13.8, 4.8 Hz, 1H), 3.03 (dd, *J* = 13.8, 9.6 Hz, 1H); <sup>13</sup>C NMR (150 MHz, Acetone *d*-6) δ 173.19, 162.69 (d, *J*<sub>FC</sub> = 241.1 Hz), 156.81, 145.08, 145.02, 142.14, 134.58, 132.05 (d, *J*<sub>FC</sub> = 8.0 Hz), 128.57, 127.96, 126.21, 126.17, 120.85, 115.82 (d, *J*<sub>FC</sub> = 21.3 Hz), 67.17, 56.13, 48.00, 37.34; HRMS (ESI-TOF) Calcd for C<sub>24</sub>H<sub>21</sub>FNO<sub>4</sub> [M+H]<sup>+</sup>: 406.1449; found: 406.1446.

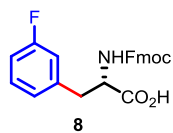

**(S)-2-((((9H-Fluoren-9-yl)methoxy)carbonyl)amino)-3-(3-fluorophenyl)propanoic acid (8)**

Total yield (47%), white solid (7.6 g). m.p. = 145-148 °C. <sup>1</sup>H NMR (600 MHz, Acetone *d*-6) δ 7.84 (d, *J* = 7.2 Hz, 2H), 7.65 (t, *J* = 7.5 Hz, 2H), 7.40 (t, *J* = 7.5 Hz, 2H), 7.34-7.29 (m, 3H), 7.16-7.12 (m, 2H), 6.99 (dt, *J* = 8.5, 2.4 Hz, 1H), 4.57-4.53 (m, 1H), 4.31-4.24 (m, 2H), 4.19 (t, *J*

= 7.2 Hz, 1H), 3.29 (dd,  $J = 13.8, 4.8$  Hz, 1H), 3.08 (dd,  $J = 13.8, 9.6$  Hz, 1H);  $^{13}\text{C}$  NMR (150 MHz, Acetone *d*-6)  $\delta$  173.13, 163.66 (d,  $J_{\text{FC}} = 242.0$  Hz), 156.88, 145.04, 145.01, 142.11, 141.47, 141.42, 130.94 (d,  $J_{\text{FC}} = 8.4$  Hz), 128.57, 127.97, 126.26 (d,  $J_{\text{FC}} = 2.6$  Hz), 126.22, 126.16, 120.84, 116.98 (d,  $J_{\text{FC}} = 21.3$  Hz), 114.24 (d,  $J_{\text{FC}} = 21.0$  Hz), 67.26, 55.99, 47.97, 37.86; HRMS (ESI-TOF) Calcd for  $\text{C}_{24}\text{H}_{21}\text{FNO}_4$   $[\text{M}+\text{H}]^+$ : 406.1449; found: 406.1450.

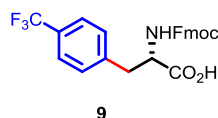

**(*S*)-2-((((9*H*-Fluoren-9-yl)methoxy)carbonyl)amino)-3-(4-(trifluoromethyl)phenyl)propanoic acid (9)**

Total yield (49%), white solid (9.0 g). m.p. = 170-174 °C.  $^1\text{H}$  NMR (600 MHz, MeOD)  $\delta$  7.78 (d,  $J = 7.8$  Hz, 2H), 7.59-7.52 (m, 4H), 7.40-7.36 (m, 4H), 7.29-7.25 (m, 2H), 4.40 (dd,  $J = 9.0, 4.8$  Hz, 1H), 4.36-4.31 (m, 1H), 4.23 (dd,  $J = 10.8, 6.6$  Hz, 1H), 4.14 (t,  $J = 6.6$  Hz, 1H), 3.31-3.28 (m, 1H), 3.02 (dd,  $J = 13.8, 9.0$  Hz, 1H);  $^{13}\text{C}$  NMR (150 MHz, MeOD)  $\delta$  176.16, 158.36, 145.33, 145.26, 143.86, 142.65, 131.16, 130.47- 129.80, 128.84, 128.20, 126.32, 126.27-126.20, 125.91(q,  $J_{\text{FC}} = 269.3$  Hz), 120.98, 120.97, 67.91, 57.13, 48.42, 38.61; HRMS (ESI-TOF) Calcd for  $\text{C}_{25}\text{H}_{21}\text{F}_3\text{NO}_4$   $[\text{M}+\text{H}]^+$ : 456.1417; found: 456.1415.

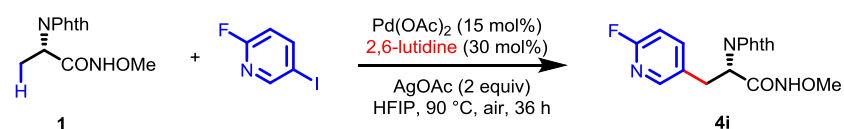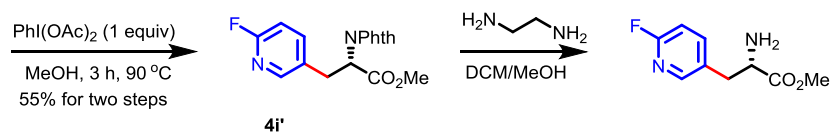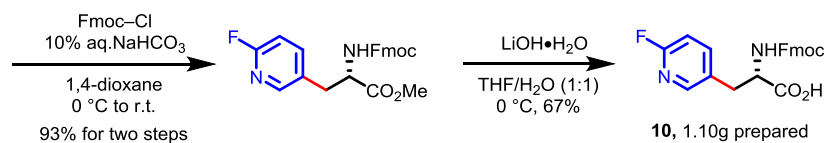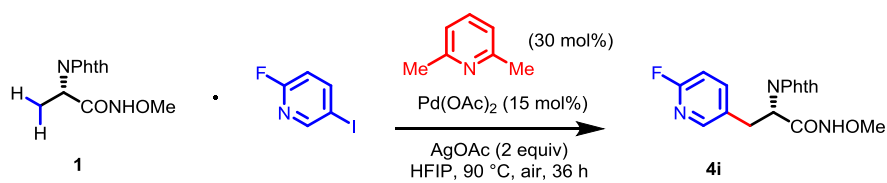

### (S)-2-(1,3-Dioxoisindolin-2-yl)-3-(6-fluoropyridin-3-yl)-N-methoxypropanamide (**4i**)

The starting material **1** (10.0 mmol, 2.48 g),  $\text{Pd}(\text{OAc})_2$  (1.50 mmol, 337 mg), and  $\text{AgOAc}$  (20.0 mmol, 3.34 g) were weighed in air and placed in a sealed tube (350 mL) with a magnetic stir bar. To the reaction mixture, aryl iodide (15 mmol), 2,6-lutidine (3.00 mmol, 0.3 mL), and HFIP (100 mL) were added. The reaction mixture was first stirred at room temperature for 10 min and then heated to 90 °C for 36 hours under vigorous stirring. Upon completion, the reaction mixture was cooled to room temperature, and HFIP was recovered by distillation. The residue was filtered with DCM and concentrated as crude product.  $^1\text{H}$  NMR (600 MHz,  $\text{CDCl}_3$ )  $\delta$  9.16 (s, 1H), 7.96 (s, 1H), 7.82-7.79 (m, 2H), 7.5-7.74 (m, 2H), 7.70-7.67 (m, 1H), 6.81 (dd,  $J = 8.4, 2.4$  Hz, 1H), 5.04 (m, 1H), 3.76 (s, 3H), 3.58-3.49 (m, 2H);  $^{13}\text{C}$  NMR (150 MHz,  $\text{CDCl}_3$ )  $\delta$  167.71, 165.97, 162.87 (d,  $J_{\text{FC}} = 237.9$  Hz), 147.78 (d,  $J_{\text{FC}} = 14.4$  Hz), 141.68 (d,  $J_{\text{FC}} = 8.0$  Hz), 134.78, 131.01, 129.49, 123.89, 109.69 (d,  $J_{\text{FC}} = 37.2$  Hz), 64.66, 53.84, 30.98; HRMS (ESI-TOF) Calcd for  $\text{C}_{17}\text{H}_{15}\text{FN}_3\text{O}_4$   $[\text{M}+\text{H}]^+$ : 343.0968; found: 343.1047.

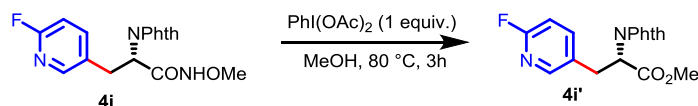

### Methyl (S)-2-(1,3-dioxoisindolin-2-yl)-3-(6-fluoropyridin-3-yl)propanoate (**4i'**)

The above crude product substrate was dissolved in MeOH (100 mL), followed by the addition of  $\text{PhI}(\text{OAc})_2$  (10 mmol, 3.22 g). The reaction mixture was heated to 80 °C for 3 hours. The reaction mixture was then cooled to room temperature and then saturated aq.  $\text{Na}_2\text{SO}_3$  and saturated aq.  $\text{NaHCO}_3$  were added. The aqueous layer was then extracted with EtOAc and the combined organic layers washed with brine, dried over  $\text{MgSO}_4$ , filtered and concentrated. After purified by column chromatography (hexanes/ EtOAc = 2/1 to 1/1) to provide product as white solid **4i'** (1.81g, 55%). (For the NMR data, please see the previous one in the section of Arylation with Heterocyclic Iodides)

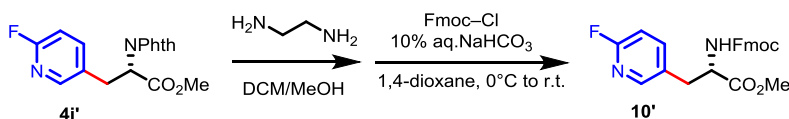

### Methyl (S)-2-((((9H-fluoren-9-yl)methoxy)carbonyl)amino)-3-(6-fluoropyridin-3-yl)propanoate (**10'**)

The substrate **4i'** (3.63 mmol, 1.19 g) was dissolved in a 1:1 mixture of DCM/MeOH (25 mL total), and ethylenediamine (18.2 mmol, 1.09 g) was added. The reaction mixture was heated to 40 °C for 3 h, and then cooled to room temperature. After removing the solvent *in vacuo*, the residue was purified by column chromatography (DCM/MeOH = 20:1 to 10:1). Amino ester was dissolved in 1,4-dioxane (22 mL), and 10% aq.  $\text{NaHCO}_3$  (14 mL) was added. The mixture was cooled to 0 °C and Fmoc-Cl (3.99 mmol, 1.03 g) was added. The ice bath was allowed to warm to room temperature overnight, after which  $\text{H}_2\text{O}$  and EtOAc was added to the reaction mixture. The aqueous layer was then extracted with EtOAc (2 x) and the combined organic layers were washed with brine, dried over  $\text{MgSO}_4$ , filtered and concentrated. After purified by column chromatography (hexanes/EtOAc = 3/1 to 2/1 to 1/1). white solid **10'** (1.42 g, 93%).  $^1\text{H}$  NMR (600 MHz,  $\text{CDCl}_3$ )  $\delta$  7.95 (s, 1H), 7.78 (d,  $J$  = 7.2 Hz, 2H), 7.57 (d,  $J$  = 7.8 Hz, 2H), 7.47 (t,  $J$  = 7.2 Hz, 1H), 7.42-7.40 (m, 2H), 7.35-7.31 (m, 2H), 6.85 (d,  $J$  = 6.0 Hz, 1H), 5.31 (d,  $J$  = 6.6 Hz,

1H), 4.64 (dd,  $J = 13.2, 6.0$  Hz, 1H), 4.49 (dd,  $J = 10.8, 6.6$  Hz, 1H), 4.42-4.39 (m, 1H), 4.21 (t,  $J = 6.6$  Hz, 1H), 3.75 (s, 3H), 3.16 (dd,  $J = 14.4, 6.0$  Hz, 1H), 3.07 (dd,  $J = 14.4, 6.0$  Hz, 1H);  $^{13}\text{C}$  NMR (150 MHz,  $\text{CDCl}_3$ )  $\delta$  171.21, 162.96 (d,  $J_{\text{FC}} = 237.5$  Hz), 155.46, 147.92 (d,  $J_{\text{FC}} = 14.3$  Hz), 143.70, 143.54, 141.93 (d,  $J_{\text{FC}} = 8.0$  Hz), 141.38, 141.32, 129.12 (d,  $J_{\text{FC}} = 4.4$  Hz), 127.79, 127.12, 127.08, 124.99, 124.90, 120.05, 120.02, 109.42 (d,  $J_{\text{FC}} = 37.2$  Hz), 66.91, 54.48, 52.68, 47.16, 34.51; HRMS (ESI-TOF) Calcd for  $\text{C}_{24}\text{H}_{22}\text{FN}_2\text{O}_4$   $[\text{M}+\text{H}]^+$ : 421.1558; found: 421.1562.

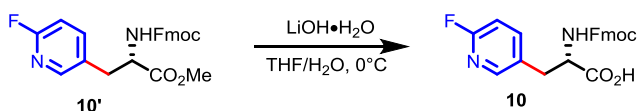

**(*S*)-2-((((9*H*-Fluoren-9-yl)methoxy)carbonyl)amino)-3-(6-fluoropyridin-3-yl)propanoic acid (**10**)**

The substrate (4.02 mmol, 1.69 g) was dissolved in THF (20 mL). The solution was cooled to 0 °C, and a cold solution of  $\text{LiOH}\cdot\text{H}_2\text{O}$  (8.04 mmol, 0.338 g) in  $\text{H}_2\text{O}$  (20 mL) were added. The reaction was maintained at 0 °C for 1 hour. The reaction was acidified with 2N HCl and extracted with EtOAc. The combined organic layers were dried over  $\text{MgSO}_4$ , and concentrated. The residue was purified by column chromatography (hexanes/EtOAc/AcOH = 10/10/1). Pale yellow solid **10** (1.10 g, 67%). m.p. = 136-138 °C.  $^1\text{H}$  NMR (600 MHz, MeOD)  $\delta$  8.06 (d,  $J = 2.4$  Hz, 1H), 7.81-7.77 (m, 3H), 7.60-7.57 (m, 2H), 7.38 (t,  $J = 7.2$  Hz, 2H), 7.29 (t,  $J = 7.2$  Hz, 2H), 6.97 (dd,  $J = 8.4, 2.4$  Hz, 1H), 4.43 (dd,  $J = 9.6, 4.8$  Hz, 1H), 4.34-4.27 (m, 2H), 4.17 (t,  $J = 7.2$  Hz, 1H), 3.24 (dd,  $J = 14.4, 4.8$  Hz, 1H), 2.98 (dd,  $J = 14.4, 9.6$  Hz, 1H);  $^{13}\text{C}$  NMR (150 MHz, MeOD)  $\delta$  174.48, 164.14 ( $J_{\text{FC}} = 236.9$  Hz), 158.47, 148.82 ( $J_{\text{FC}} = 13.4$  Hz), 145.32, 145.19, 144.15 ( $J_{\text{FC}} = 8.6$  Hz), 142.65, 132.81 ( $J_{\text{FC}} = 5.4$  Hz), 128.86, 128.24, 126.29, 126.24, 121.00, 120.99, 110.37 ( $J_{\text{FC}} = 36.8$  Hz), 67.99, 56.29, 48.42, 34.76; HRMS (ESI-TOF) Calcd for  $\text{C}_{23}\text{H}_{20}\text{FN}_2\text{O}_4$   $[\text{M}+\text{H}]^+$ : 407.1402; found: 407.1401.

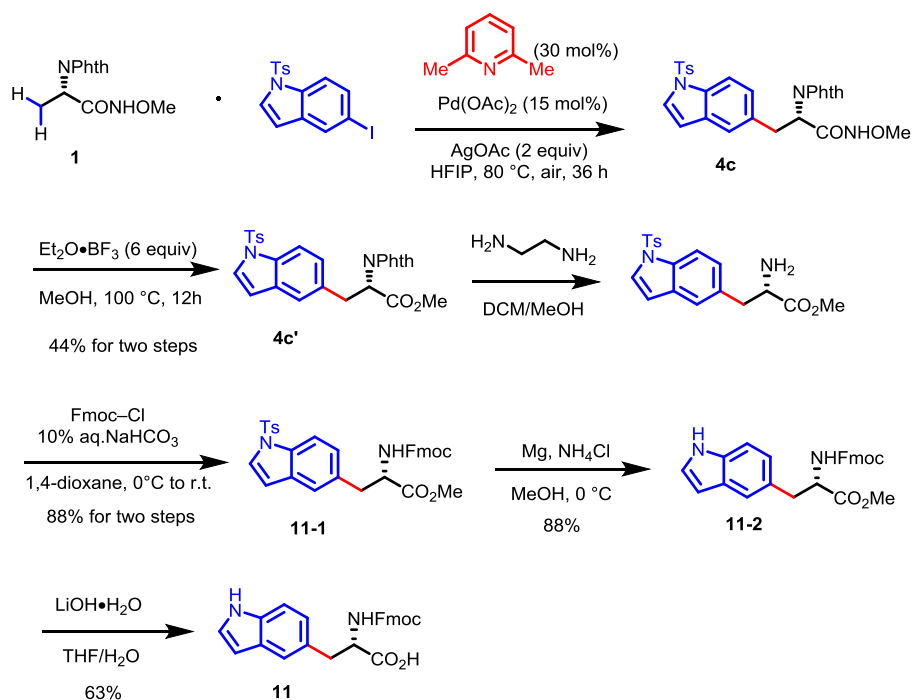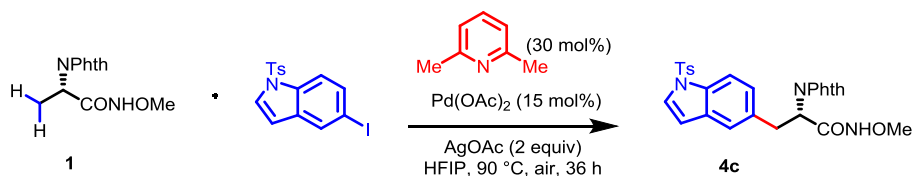

### (*S*)-2-(1,3-Dioxoisindolin-2-yl)-*N*-methoxy-3-(1-tosyl-1H-indol-5-yl)propanamide (**4c**)

Substrate **1** (25 mmol, 6.2 g),  $\text{Pd}(\text{OAc})_2$  (3.75 mmol, 844 mg), and  $\text{AgOAc}$  (50 mmol, 8.35 g) were weighed in air and placed in a sealed tube (350 mL) with a magnetic stir bar. To the reaction mixture, aryl iodide (37.5 mmol, 14.9 g), 2,6-lutidine (7.5 mmol, 0.75 mL), and HFIP (130 mL) were added. The reaction mixture was first stirred at room temperature for 10 min and then heated to 90 °C for 36 hours under vigorous stirring. Upon completion, the reaction mixture was cooled to room temperature. The solvents were removed under reduced pressure and recovered for next use, and the resulting mixture was used directly for next step.

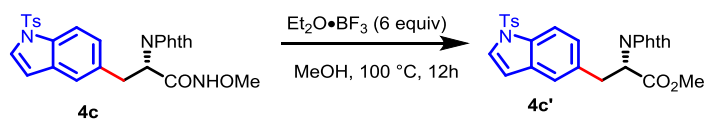

### Methyl (*S*)-2-(1,3-dioxoisindolin-2-yl)-3-(1-(tosyl-1*H*-indol-5-yl)propanoate (**4c'**)

A sealable pressure flask was charged with MeOH (120 mL) and crude amide **4c**. Et<sub>2</sub>O•BF<sub>3</sub> (105 mmol, 14 mL) was added and the reaction vessel sealed. The reaction mixture was heated to 100 °C for 12 hours under vigorous stirring. Upon completion, the reaction mixture was cooled to room temperature. The solvents were removed under reduced pressure and H<sub>2</sub>O and EtOAc was added, organic layers were removed and the aqueous layer was then extracted with EtOAc (3 x) and the combined organics washed with brine, dried over MgSO<sub>4</sub>, filtered and concentrated. After purified by column chromatography (hexanes/ EtOAc = 2/1 to 1/1) to provide **4c'** white solid (5.53 g, 44%). <sup>1</sup>H NMR (600 MHz, CDCl<sub>3</sub>) δ 7.79 (d, *J* = 8.4 Hz, 1H), 7.76-7.73 (m, 2H), 7.69-7.66 (m, 3H), 7.45 (d, *J* = 3.6 Hz, 1H), 7.33-7.30 (m, 1H), 7.18 (d, *J* = 8.4 Hz, 2H), 7.10 (dd, *J* = 8.4, 1.2 Hz, 1H), 6.50 (d, *J* = 3.6 Hz, 1H), 5.17 (dd, *J* = 10.8, 5.4 Hz, 1H), 3.77 (s, 3H), 3.66-3.58 (m, 3H), 2.33 (s, 3H); <sup>13</sup>C NMR (150 MHz, CDCl<sub>3</sub>) δ 169.36, 167.49, 144.84, 135.23, 134.10, 133.86, 131.79, 131.56, 131.01, 129.82, 126.73, 126.56, 125.41, 123.49, 121.54, 113.56, 108.89, 53.46, 52.92, 34.46, 21.56; HRMS (ESI-TOF) Calcd for C<sub>27</sub>H<sub>23</sub>N<sub>2</sub>O<sub>6</sub>S [M+H]<sup>+</sup>: 503.1271; found: 503.1271.

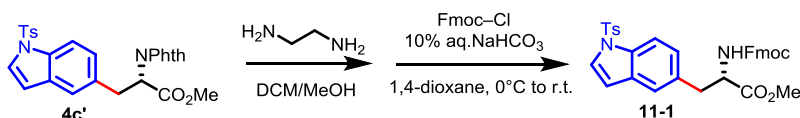

### Methyl (*S*)-2-(((9*H*-fluoren-9-yl)methoxy)carbonyl)amino)-3-(1-(tosyl-1*H*-indol-5-yl)propanoate (**11-1**)

**4c'** (15 mmol, 7.5 g) was dissolved in a 1:1 mixture of DCM/MeOH (80 mL total), followed by the addition of ethylenediamine (75 mmol, 5 mL). The reaction mixture was heated to 40 °C for 3 h, and then cooled to room temperature. Then reaction mixture (with solvent) was transferred to a column with silica gel directly and purified by column chromatography (DCM/MeOH = 10/1). Amino ester was dissolved in 1,4-dioxane (60 mL), and 10% aq. NaHCO<sub>3</sub> (45 mL) was added. The mixture was cooled to 0 °C and Fmoc-Cl (16.5 mmol, 4.3 g) was added. The ice bath



was allowed to warm to room temperature overnight, after which H<sub>2</sub>O and EtOAc was added to the reaction mixture. The aqueous layer was then extracted with EtOAc (3 x) and the combined organics washed with brine, dried over MgSO<sub>4</sub>, filtered and concentrated. After purified by column chromatography (hexanes/EtOAc = 3/1 to 2/1 to 1/1). **11-1** was obtained as white solid (8.1 g, 88%). <sup>1</sup>H NMR (600 MHz, CDCl<sub>3</sub>) δ 7.89 (d, *J* = 8.4 Hz, 1H), 7.77 (d, *J* = 7.2 Hz, 1H), 7.74 (d, *J* = 8.4 Hz, 2H), 7.56-7.52 (m, 4H), 7.41-7.39 (m, 2H), 7.31-7.28 (m, 2H), 7.18 (d, *J* = 8.4 Hz, 1H), 7.02 (d, *J* = 8.4 Hz, 1H), 6.58 (d, *J* = 3.6 Hz, 1H), 5.22 (d, *J* = 7.8 Hz, 1H), 4.67 (dd, *J* = 13.8, 6.0 Hz, 1H), 4.43-4.41 (m, 1H), 4.32 (dd, *J* = 10.2, 6.6 Hz, 1H), 4.19 (t, *J* = 6.6 Hz, 1H), 3.71 (s, 3H), 3.20-3.13 (m, 2H), 2.30 (s, 3H); <sup>13</sup>C NMR (150 MHz, CDCl<sub>3</sub>) δ 171.91, 155.54, 144.99, 143.81, 143.71, 141.31, 135.28, 133.99, 131.06, 130.73, 129.91, 127.76, 127.09, 126.79, 126.75, 125.88, 125.10, 125.03, 121.92, 120.02, 120.00, 113.56, 108.77, 66.95, 54.97, 52.39, 47.15, 38.07, 21.54; HRMS (ESI-TOF) Calcd for C<sub>34</sub>H<sub>31</sub>N<sub>2</sub>O<sub>6</sub>S [M+H]<sup>+</sup>: 595.1897; found: 595.1897.

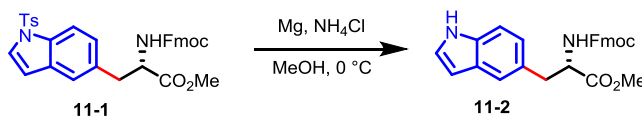

**Methyl (*S*)-2-(((9*H*-fluoren-9-yl)methoxy)carbonyl)amino)-3-(1*H*-indol-5-yl)propanoate (11-2)**

A solution of the *N*-Ts methyl ester (12 mmol, 7.13g) and NH<sub>4</sub>Cl (120 mmol, 6.5g) in MeOH (240 mL) was cooled to 0 °C, Mg powder (325 mesh) (240 mmol, 5.8g) was added in small portions under vigorous stirring. Upon completion (about 4h), a solution of AcOH (30 mL) in ethylacetate (150 mL) was added at 0 °C and the resulting mixture stirred for 30 min. After filtration by celite, filtrate was concentrated. The residue was dissolved in ethylacetate and water (400 mL/150 mL). The aq. layer was extracted with EtOAc (100 mL × 2). The combined ethylacetate phase was dried over Na<sub>2</sub>SO<sub>4</sub>, filtrated and concentrated. After purified by column chromatography (EtOAc/hexanes/DCM = 1/10/10 to 2/10/10). **11-2** was obtained as white solid (4.4 g, 83%). <sup>1</sup>H NMR (600 MHz, CDCl<sub>3</sub>) δ 8.14 (s, 1H), 7.76 (d, *J* = 7.2 Hz, 2H), 7.55 (dd, *J* = 13.8, 7.2 Hz, 2H), 7.40-7.38 (m, 2H), 7.33-7.28 (m, 3H), 7.21 (t, *J* = 3.0 Hz, 1H), 6.94 (d, *J* = 8.4 Hz, 1H), 6.51 (s, 1H), 5.26 (d, *J* = 8.4 Hz, 1H), 4.71 (dd, *J* = 13.8, 6.0 Hz, 1H), 4.41 (dd, *J* = 10.2,

7.2 Hz, 1H), 4.31 (dd,  $J = 10.8, 7.2$  Hz, 1H), 4.21 (t,  $J = 7.2$  Hz, 1H), 3.74 (s, 3H), 3.23 (dd,  $J = 5.4, 3.6$  Hz, 2H);  $^{13}\text{C}$  NMR (150 MHz,  $\text{CDCl}_3$ )  $\delta$  172.29, 170.66, 155.66, 143.90, 143.84, 141.29, 135.03, 128.20, 127.67, 127.05, 126.81, 125.21, 125.13, 124.62, 123.35, 121.29, 119.96, 119.94, 111.21, 102.56, 67.01, 55.19, 52.30, 47.17, 38.32; HRMS (ESI-TOF) Calcd for  $\text{C}_{27}\text{H}_{25}\text{N}_2\text{O}_4$   $[\text{M}+\text{H}]^+$ : 441.1809; found: 441.1810.

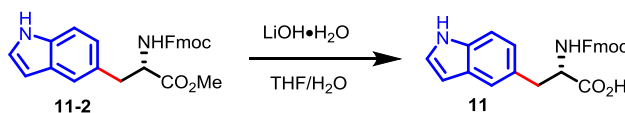

**(S)-2-((((9H-Fluoren-9-yl)methoxy)carbonyl)amino)-3-(1H-indol-5-yl)propanoic acid (**11**)**

The substrate **11** (21.3 mmol, 9.4 g) was dissolved in THF (100 mL). The solution was cooled to 0 °C, and a cold solution of  $\text{LiOH}\cdot\text{H}_2\text{O}$  (42.6 mmol, 1.79 g) in  $\text{H}_2\text{O}$  (100 mL) were added. The reaction was maintained at 0 °C for 1 hour. The reaction was acidified with 2N HCl and extracted with EtOAc. The combined organic layers were dried over  $\text{MgSO}_4$ , and concentrated. The residue was purified by column chromatography (hexanes/EtOAc/AcOH = 10/10/1). **11** was obtained as white solid (5.7 g, 63%). m.p. = 119-121 °C.  $^1\text{H}$  NMR (600 MHz, MeOD)  $\delta$  7.75 (d,  $J = 7.2$  Hz, 2H), 7.53 (t,  $J = 8.4$  Hz, 2H), 7.44 (s, 1H), 7.34 (dd,  $J = 13.8, 6.6$  Hz, 2H), 7.29 (d,  $J = 8.4$  Hz, 1H), 7.23 (t,  $J = 7.2$  Hz, 1H), 7.19-7.16 (m, 2H), 7.01 (d,  $J = 8.4$  Hz, 1H), 6.36 (d,  $J = 3.0$  Hz, 1H), 4.46 (dd,  $J = 9.0, 4.8$  Hz, 1H), 4.27 (dd,  $J = 9.6, 6.6$  Hz, 1H), 4.16-4.11 (m, 2H), 3.28 (dd,  $J = 13.8, 4.8$  Hz, 1H), 3.02 (dd,  $J = 13.8, 9.6$  Hz, 1H);  $^{13}\text{C}$  NMR (150 MHz, MeOD)  $\delta$  175.77, 158.49, 145.30, 142.58, 136.86, 129.74, 128.79, 128.23, 126.48, 126.32, 125.92, 123.75, 121.84, 120.92, 112.22, 102.28, 68.10, 57.60, 48.39, 39.03; HRMS (ESI-TOF) Calcd for  $\text{C}_{26}\text{H}_{23}\text{N}_2\text{O}_4$   $[\text{M}+\text{H}]^+$ : 427.1652; found: 427.16.

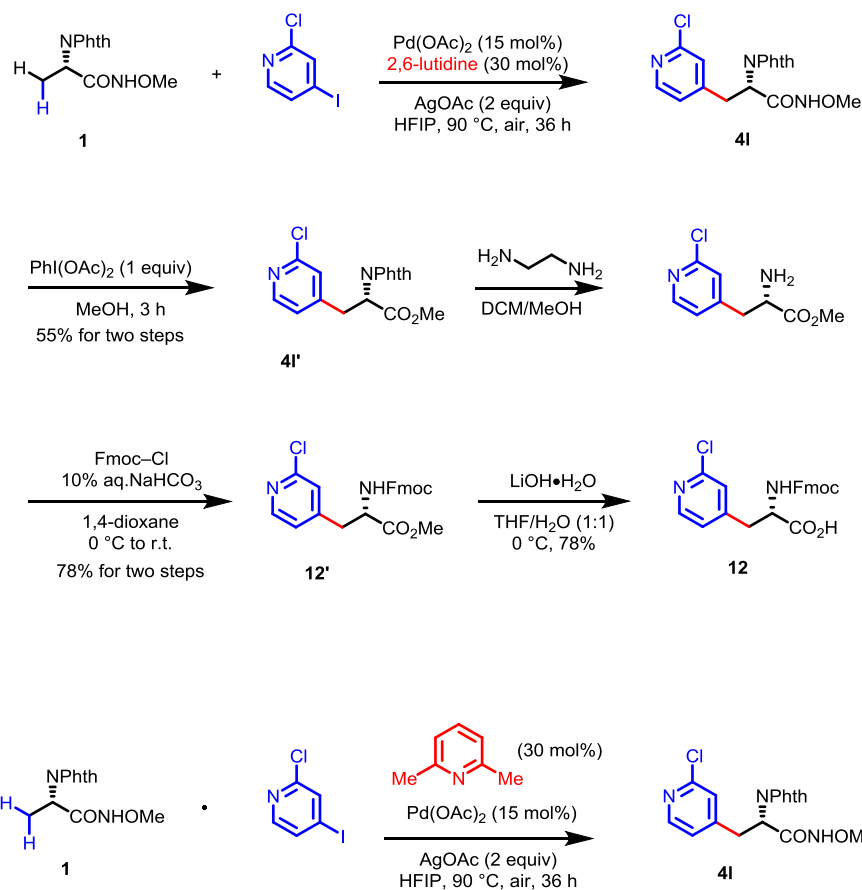

### (*S*)-3-(2-Chloropyridin-4-yl)-2-(1,3-dioxoisindolin-2-yl)-*N*-methoxypropanamide (**4I**)

The starting material **1** (10.0 mmol, 2.48 g),  $\text{Pd}(\text{OAc})_2$  (1.50 mmol, 337 mg), and AgOAc (20.0 mmol, 3.34 g) were weighed in air and placed in a sealed tube (350 mL) with a magnetic stir bar. To the reaction mixture, aryl iodide (15 mmol), 2,6-lutidine (3.00 mmol, 0.3 mL), and HFIP (100 mL) were added. The reaction mixture was first stirred at room temperature for 10 min and then heated to 90 °C for 36 hours under vigorous stirring. Upon completion, the reaction mixture was cooled to room temperature, and HFIP was recovered by distillation. The residue was filtered with DCM and concentrated as crude product **4I**.

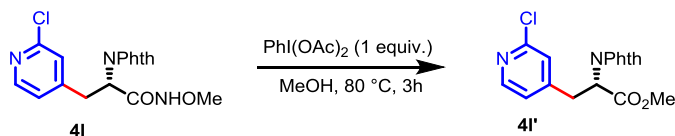

### Methyl (*S*)-3-(2-chloropyridin-4-yl)-2-(1,3-dioxoisindolin-2-yl)propanoate (**4I'**)

The above crude product substrate was dissolved in MeOH (100 mL), followed by the addition of  $\text{PhI}(\text{OAc})_2$  (10 mmol, 3.22 g). The reaction mixture was heated to 80 °C for 3 hours. The reaction mixture was then cooled to room temperature and then saturated aq.  $\text{Na}_2\text{SO}_3$  and saturated aq.  $\text{NaHCO}_3$  were added. The aqueous layer was then extracted with EtOAc and the combined organic layers washed with brine, dried over  $\text{MgSO}_4$ , filtered and concentrated. After purified by column chromatography (hexanes/ EtOAc = 2/1 to 1/1) to provide product **4l'** (2.00 g, 55%).

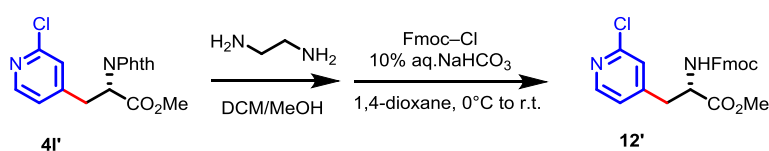

**Methyl (S)-2-(((9H-fluoren-9-yl)methoxy)carbonyl)amino)-3-(2-chloropyridin-4-yl)propanoate (**12'**)**

The substrate **4l'** (24.6 mmol, 8.5 g) was dissolved in a 1:1 mixture of DCM/MeOH (100 mL total), and ethylenediamine (123 mmol, 7.36 g) was added. The reaction mixture was heated to 40 °C for 3 h, and then cooled to room temperature. Then reaction mixture (with solvent) was transferred to a column with silica gel directly and purified by column chromatography (DCM/MeOH = 10/1). Amino ester was dissolved in 1,4-dioxane (100 mL), and 10% aq.  $\text{NaHCO}_3$  (75 mL) was added. The mixture was cooled to 0 °C and Fmoc-Cl (30 mmol, 7.69 g) was added. The ice bath was allowed to warm to room temperature overnight, after which  $\text{H}_2\text{O}$  and EtOAc was added to the reaction mixture. The aqueous layer was then extracted with EtOAc and the combined organic layers were washed with brine, dried over  $\text{MgSO}_4$ , filtered and concentrated. After purified by column chromatography (hexanes/EtOAc = 3/1 to 2/1 to 1/1). **12'** was obtained as white solid (8 g, 78%).

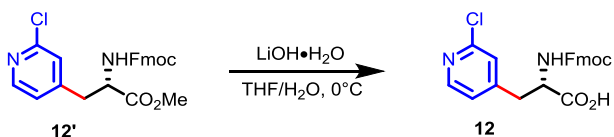

**(S)-2-((((9H-Fluoren-9-yl)methoxy)carbonyl)amino)-3-(2-chloropyridin-4-yl)propanoic acid (12)**

The substrate **12'** (18.3 mmol, 8.0 g) was dissolved in THF (100 mL). The solution was cooled to 0 °C, and a cold solution of LiOH•H<sub>2</sub>O (36.6 mmol, 1.53 g) in H<sub>2</sub>O (100 mL) were added. The reaction was maintained at 0 °C for 1 hour. The reaction was acidified with 2N HCl and extracted with EtOAc. The combined organic layers were dried over MgSO<sub>4</sub>, and concentrated. The residue was purified by column chromatography (hexanes/EtOAc/AcOH = 10/10/1). **12** was obtained as white solid (6.0 g, 78%). m.p. = 202-204 °C. <sup>1</sup>H NMR (600 MHz, MeOD) δ 8.17 (d, *J* = 4.8 Hz, 1H), 7.78 (d, *J* = 7.8 Hz, 2H), 7.60 (dd, *J* = 12.0, 7.8 Hz, 2H), 7.39-7.35 (m, 3H), 7.31-7.28 (m, 2H), 7.23 (d, *J* = 4.8 Hz, 1H), 4.38 (dd, *J* = 10.2, 6.6 Hz, 1H), 4.30 (dd, *J* = 7.8, 4.8 Hz, 1H), 4.21 (dd, *J* = 10.2, 6.6 Hz, 1H), 4.17-4.15 (m, 1H), 3.23 (dd, *J* = 13.2, 4.8 Hz, 1H), 2.99 (dd, *J* = 13.8, 8.4 Hz, 1H); <sup>13</sup>C NMR (150 MHz, MeOD) δ 176.85, 158.00, 153.94, 152.04, 150.01, 145.40, 145.29, 142.64, 128.84, 128.25, 128.23, 126.75, 126.35, 126.22, 125.53, 120.98, 120.96, 67.85, 57.82, 48.47, 38.91; HRMS (ESI-TOF) Calcd for C<sub>23</sub>H<sub>20</sub>ClN<sub>2</sub>O<sub>4</sub> [M+H]<sup>+</sup>: 423.1106; found: 423.1107.

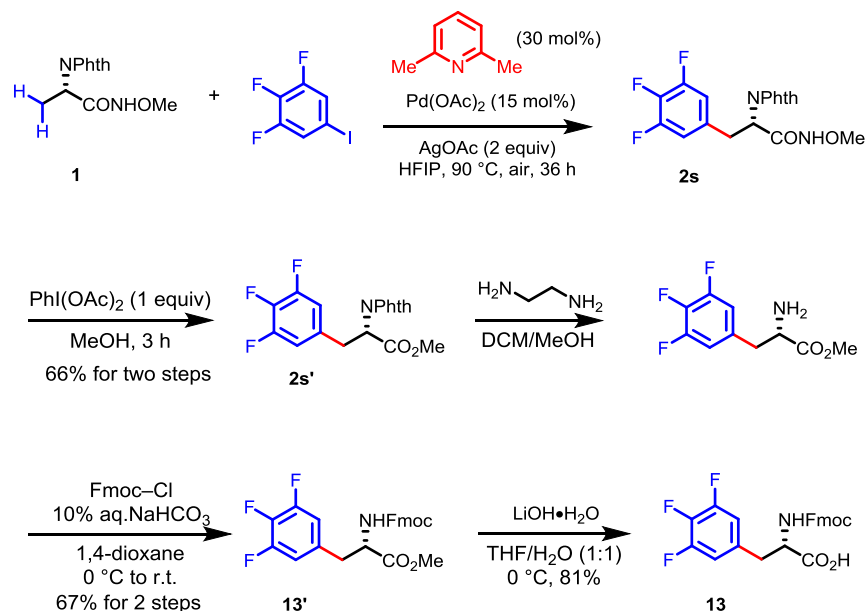

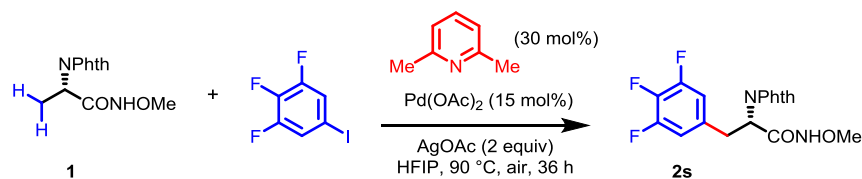

### (*S*)-2-(1,3-Dioxoisindolin-2-yl)-*N*-methoxy-3-(3,4,5-trifluorophenyl)propanamide (**2s**)

The starting material **1** (10.0 mmol, 2.48 g), Pd(OAc)<sub>2</sub> (1.50 mmol, 337 mg), and AgOAc (20.0 mmol, 3.34 g) were weighed in air and placed in a sealed tube (350 mL) with a magnetic stir bar. To the reaction mixture, aryl iodide (15 mmol), 2,6-lutidine (3.00 mmol, 0.3 mL), and HFIP (100 mL) were added. The reaction mixture was first stirred at room temperature for 10 min and then heated to 90 °C for 36 hours under vigorous stirring. Upon completion, the reaction mixture was cooled to room temperature, and HFIP was recovered by distillation. The residue was filtered with DCM and concentrated as crude product **2s**.

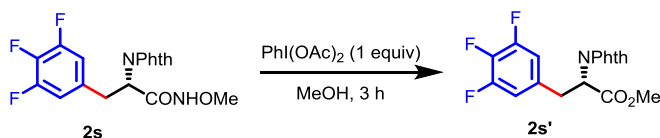

### Methyl (*S*)-2-(1,3-Dioxoisindolin-2-yl)-3-(3,4,5-trifluorophenyl)propanoate (**2s'**)

The above crude product substrate **2s** was dissolved in MeOH (100 mL), followed by the addition of PhI(OAc)<sub>2</sub> (10 mmol, 3.22 g). The reaction mixture was heated to 80 °C for 3 hours. The reaction mixture was then cooled to room temperature and then saturated aq. Na<sub>2</sub>SO<sub>3</sub> and saturated aq. NaHCO<sub>3</sub> were added. The aqueous layer was then extracted with EtOAc and the combined organic layers washed with brine, dried over MgSO<sub>4</sub>, filtered and concentrated. After purified by column chromatography (hexanes/ EtOAc = 2/1 to 1/1) to provide product **2s'** 2.49 g (66%). (For the NMR Data, please see the previous one in the section of Mono-arylation)

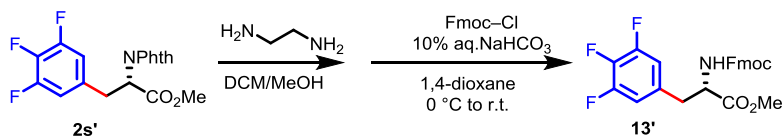

### Methyl (*S*)-2-(((9*H*-fluoren-9-yl)methoxy)carbonyl)amino-3-(3,4,5-trifluorophenyl)propanoate (**13'**)

The substrate **2s'** (5.11 mmol, 1.86 g) was dissolved in a 1:1 mixture of DCM/MeOH (40 mL total), and ethylenediamine (25 mmol, 1.47 g) was added. The reaction mixture was heated to 40 °C for 3 h, and then cooled to room temperature. Then reaction mixture (with solvent) was transferred to a column with silica gel directly and purified by column chromatography (DCM/MeOH = 10/1). Amino ester was dissolved in 1,4-dioxane (20 mL), and 10% aq. NaHCO<sub>3</sub> (15 mL) was added. The mixture was cooled to 0 °C and Fmoc-Cl (6.22 mmol, 0.94 g) was added. The ice bath was allowed to warm to room temperature overnight, after which H<sub>2</sub>O and EtOAc was added to the reaction mixture. The aqueous layer was then extracted with EtOAc (2 x) and the combined organic layers were washed with brine, dried over MgSO<sub>4</sub>, filtered and concentrated. The residue was purified by column chromatography (hexanes/EtOAc = 3/1 to 2/1 to 1/1). **13'** was obtained as white solid (3.43 g, 67%). <sup>1</sup>H NMR (600 MHz, CDCl<sub>3</sub>) δ 7.77 (d, *J* = 7.2 Hz, 2H), 7.56 (t, *J* = 6.6 Hz, 2H), 7.40 (dd, *J* = 13.2, 7.2 Hz, 2H), 7.33-7.30 (m, 2H), 6.69 (t, *J* = 6.6 Hz, 2H), 5.33 (d, *J* = 6.6 Hz, 1H), 4.61 (dd, *J* = 13.2, 6.0 Hz, 1H), 4.50 (dd, *J* = 10.2, 7.2 Hz, 1H), 4.39 (dd, *J* = 10.8, 6.6 Hz, 1H), 4.20 (t, *J* = 6.6 Hz, 1H), 3.74 (s, 3H), 3.06 (dd, *J* = 13.8, 5.4 Hz, 1H), 2.98 (dd, *J* = 13.8, 6.0 Hz, 1H); <sup>13</sup>C NMR (150 MHz, CDCl<sub>3</sub>) δ 171.19, 155.45, 151.03 (ddd, *J*<sub>FC</sub> = 249.0, 9.6, 3.2 Hz), 143.74, 143.48, 141.51, 141.35, 141.33, 138.98 (dt, *J*<sub>FC</sub> = 249.9, 14.7 Hz), 132.22-132.10, 127.79, 127.10, 127.07, 127.04, 124.97, 124.87, 120.06, 113.36 (dd, *J*<sub>FC</sub> = 16.6, 3.9 Hz), 66.92, 54.44, 52.64, 47.16, 37.60; HRMS (ESI-TOF) Calcd for C<sub>25</sub>H<sub>21</sub>F<sub>3</sub>NO<sub>4</sub> [M+H]<sup>+</sup>: 456.1417; found: 456.1419.

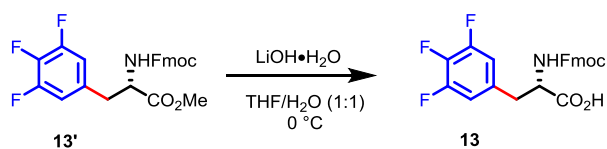

**(S)-2-((((9H-Fluoren-9-yl)methoxy)carbonyl)amino)-3-(3,4,5-trifluorophenyl)propanoic acid (**13**)**

The substrate **13'** (3.43 mmol, 1.56 g) was dissolved in THF (20 mL). The solution was cooled to 0 °C, and a cold solution of LiOH·H<sub>2</sub>O (6.86 mmol, 0.288 g) in H<sub>2</sub>O (20 mL) were added. The reaction was maintained at 0 °C for 1 hour. The reaction was acidified with 2N HCl and extracted with EtOAc. The combined organic layers were dried over MgSO<sub>4</sub>, and concentrated. The residue was purified by column chromatography (hexanes/EtOAc/AcOH = 10/10/1). **13** was obtained as white solid (1.23 g, 81%). m.p. = 165-168 °C. <sup>1</sup>H NMR (600 MHz, MeOD) δ 7.78

(d,  $J = 7.2$  Hz, 2H), 7.62-7.56 (m, 2H), 7.39-7.36 (m, 2H), 7.28 (t,  $J = 7.8$  Hz, 2H), 6.98 (t,  $J = 7.8$  Hz, 2H), 4.39-4.33 (m, 2H), 4.26 (dd,  $J = 10.8, 6.6$  Hz, 1H), 4.19 (t,  $J = 6.6$  Hz, 1H), 3.17 (dd,  $J = 13.8, 4.2$  Hz, 1H), 2.90 (dd,  $J = 13.2, 9.6$  Hz, 1H);  $^{13}\text{C}$  NMR (150 MHz, MeOD)  $\delta$  175.88, 158.34, 152.16 (ddd,  $J_{\text{FC}} = 246.5, 9.8, 3.9$  Hz), 145.37, 145.21, 142.67, 139.79 (dt,  $J_{\text{FC}} = 246.2, 10.5$  Hz), 136.51-136.37, 128.85, 128.20, 126.29, 126.19, 121.00, 120.98, 114.71 (dd,  $J_{\text{FC}} = 16.7, 4.2$  Hz), 67.91, 57.10, 48.45, 38.26; HRMS (ESI-TOF) Calcd for  $\text{C}_{24}\text{H}_{19}\text{F}_3\text{NO}_4$   $[\text{M}+\text{H}]^+$ : 442.1261; found: 442.1264.

### Diverse Synthetic Applications:

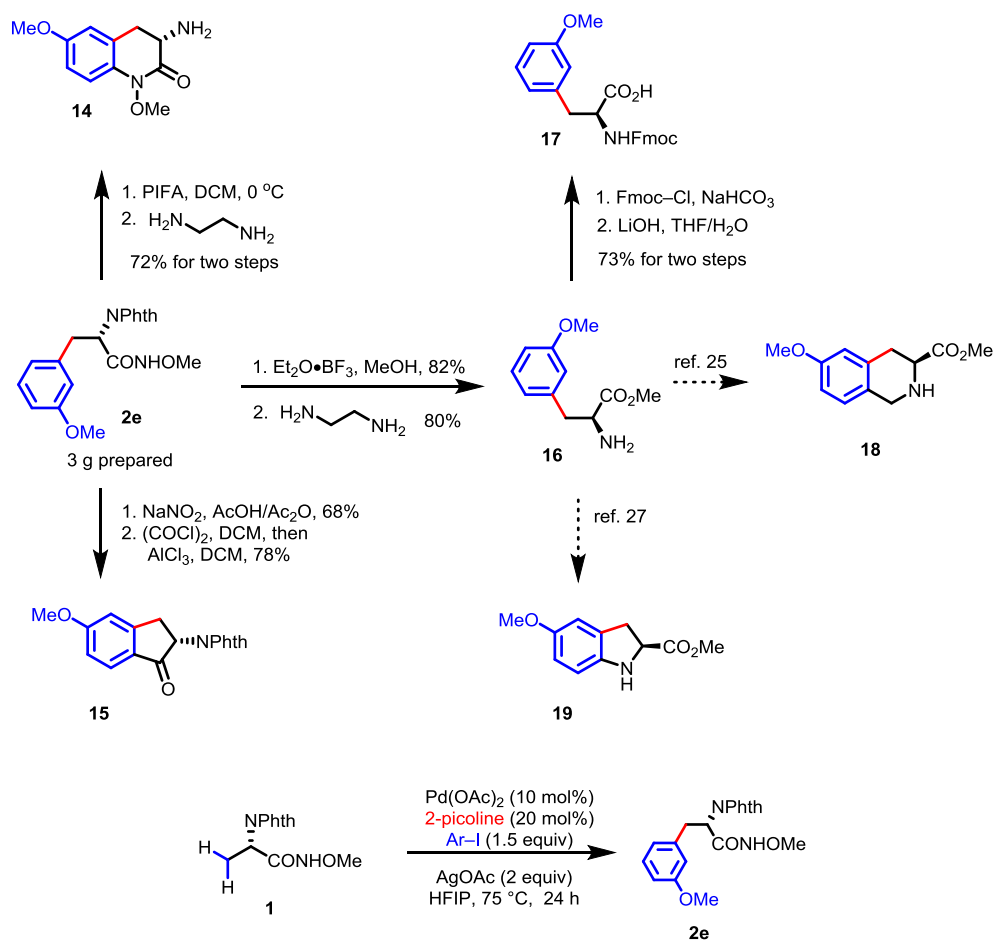

### (S)-2-(1,3-Dioxoisindolin-2-yl)-N-methoxy-3-(3-methoxyphenyl)propanamide (**2e**)

The starting material **1** (10.0 mmol, 2.48 g),  $\text{Pd}(\text{OAc})_2$  (1.0 mmol, 220 mg), and  $\text{AgOAc}$  (20.0 mmol, 3.34 g) were weighed in air and placed in a sealed tube (350 mL) with a magnetic stir bar.



To the reaction mixture, aryl iodide (15 mmol), 2-picoline (2.00 mmol, 0.2 mL), HFIP (100 mL) were added. The reaction mixture was first stirred at room temperature for 10 min and then heated to 75 °C for 24 h under vigorous stirring. Upon completion, the reaction mixture was cooled to room temperature, filtered with celite using DCM. The solvents were removed under reduced pressure and the resulting mixture was purified by a silica gel-packed flash chromatography column using DCM/EtOAc (1/0 to 4/1 to 2/1) as the eluent. **2e** was obtained as yellow oil (2.90 g, 82%).

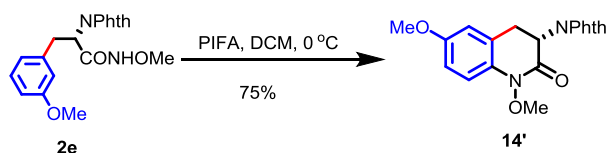

**(S)-2-(1,6-Dimethoxy-2-oxo-1,2,3,4-tetrahydroquinolin-3-yl)isoindoline-1,3-dione (**14'**)**

Amide **2e** (0.3 mmol, 106.2 mg) was dissolved in DCM (2 mL), in an ice-cooled flask. Phenyliodine(III) bis(trifluoroacetate) (PIFA, 0.45 mmol) was added in one portion and the reaction mixture was stirred at 0 °C, and monitored by TLC.. After completion of the reaction (about 3h), the mixture was diluted with DCM (4 mL) and washed with a saturated aqueous NaHCO<sub>3</sub> solution, then with saturated aqueous sodium chloride solution, dried over sodium sulfate, filtered and concentrated *in vacuo*. The resulting yellow oil was purified by silica gel chromatography using hexanes/EtOAc (5/1 to 3/1 to 2/1) as the eluent. **14'** was obtained as white solid (79.2 mg, 75%).<sup>4</sup> <sup>1</sup>H NMR (600 MHz, CDCl<sub>3</sub>) δ 7.90-7.89 (m, 2H), 7.77-7.75 (m, 2H), 7.19 (d, *J* = 9.0 Hz, 1H), 6.86 (dd, *J* = 9.0, 3.0 Hz, 1H), 6.76 (dd, *J* = 3.0, 1.2 Hz, 1H), 5.14 (dd, *J* = 15.0, 6.0 Hz, 1H), 4.03-3.93 (m, 4H), 3.81 (s, 3H), 2.92 (dd, *J* = 15.0, 6.3 Hz, 1H); <sup>13</sup>C NMR (150 MHz, CDCl<sub>3</sub>) δ 167.59, 161.03, 156.33, 134.25, 131.91, 130.75, 123.64, 122.54, 114.23, 113.90, 112.92, 62.73, 55.64, 48.86, 29.92; HRMS (ESI-TOF) Calcd C<sub>19</sub>H<sub>17</sub>N<sub>2</sub>O<sub>5</sub> [M+H]<sup>+</sup>: 353.1132; found: 353.1135.

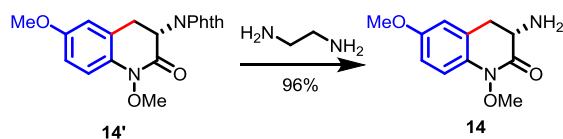

**(S)-3-Amino-1,6-dimethoxy-3,4-dihydroquinolin-2(1H)-one (**14**)**

The substrate **14'** (0.2 mmol, 70.4 mg) was dissolved in a 1:1 mixture of DCM/MeOH (2 mL total), and ethylenediamine (0.4 mmol) was added. The reaction mixture was heated to 40 °C for 3 h, and then cooled to room temperature. After removing the solvent *in vacuo*, the residue was purified by column chromatography (DCM/MeOH = 20/1 to 10/1). **14** was obtained as gray solid (42.8 mg, 96%). <sup>1</sup>H NMR (600 MHz, CDCl<sub>3</sub>) δ 7.13 (d, *J* = 8.8 Hz, 1H), 6.83 (dd, *J* = 8.7, 2.7, Hz, 1H), 6.77 (d, *J* = 9.0 Hz, 1H), 3.91 (s, 3H), 3.80 (s, 3H), 3.63 (dd, *J* = 13.2, 6.0 Hz, 1H), 3.05 (dd, *J* = 15.6, 6.0 Hz, 1H), 2.86-2.81 (m, 1H); <sup>13</sup>C NMR (150 MHz, CDCl<sub>3</sub>) δ 167.17, 156.20, 130.74, 123.82, 114.34, 113.75, 112.69, 62.37, 55.60, 51.06, 34.21; HRMS (ESI-TOF) Calcd for C<sub>11</sub>H<sub>14</sub>N<sub>2</sub>O<sub>3</sub> [M+H]<sup>+</sup>: 222.1004; found: 223.1079.

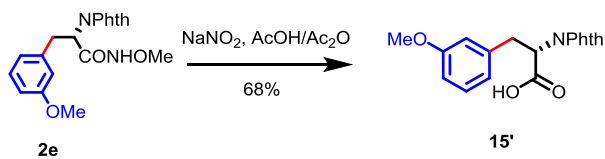

#### (S)-2-(1,3-Dioxoisindolin-2-yl)-3-(3-methoxyphenyl)propanoic acid (**15'**)

The mono-arylated product **2e** (0.3 mmol, 106mg) was dissolved in the mixed solvents (3 mL, AcOH/Ac<sub>2</sub>O = 1/2), and then cooled to 0 °C. NaNO<sub>2</sub> (414 mg, 6 mmol) was slowly added into the reaction mixture in portions. The reaction mixture was first stirred at 0 °C for 3 h and then at room temperature for 17 hours. Upon completion, the solvents were removed under reduced pressure, and the mixture was neutralized by slow addition of saturated NaHCO<sub>3</sub> solution to pH 8. The aqueous phase was extracted with ether (4 × 10 mL), and then carefully acidified with cold HCl solution (1 N) to pH 2, and then extracted with ether (4 × 20 mL). The combined organic layers were washed with brine, dried over anhydrous Na<sub>2</sub>SO<sub>4</sub>, filtered and concentrated *in vacuo* to afford the desired product **15'** as yellow oil (66.3 mg, 68%).<sup>5</sup> <sup>1</sup>H NMR (600 MHz, CDCl<sub>3</sub>) δ 7.78-7.76 (m, 2H), 7.68-7.67 (m, 2H), 7.09 (t, *J* = 7.8 Hz, 1H), 6.75 (d, *J* = 7.8 Hz, 1H), 6.69-6.67 (m, 2H), 5.23-5.20 (m, 1H), 3.67 (s, 3H), 3.56-3.54 (m, 2H); <sup>13</sup>C NMR (150 MHz, CDCl<sub>3</sub>) δ 173.71, 167.41, 159.61, 138.01, 134.15, 131.52, 129.57, 123.53, 121.12, 114.03, 112.80, 60.48, 55.08, 34.44; HRMS (ESI-TOF) Calcd for C<sub>18</sub>H<sub>14</sub>NO<sub>5</sub> [M-H]<sup>-</sup>: 324.0877; found: 324.0880.

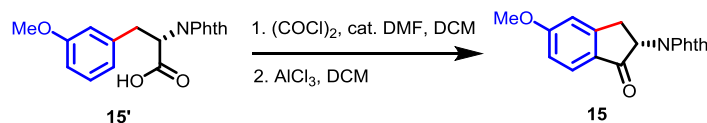

**(S)-2-(5-Methoxy-1-oxo-2,3-dihydro-1H-inden-2-yl)isoindoline-1,3-dione (15)**

To a solution of **15'** (0.2 mmol, 65 mg) in DCM (2 mL) was added a drop of DMF and oxalyl chloride (0.6 mmol) at room temperature. Stirring was continued for 3 h at that temperature. After concentration of the mixture *in vacuo*, the residue was dissolved in DCM (2 mL) and added dropwise rapidly to a suspension of AlCl<sub>3</sub> (0.6 mol, 79.7 mg) in DCM (2 mL). Stirring was continued for 1-2 h after the addition had been completed. The mixture was poured into ice-cold dilute HCl with vigorous stirring which was continued for 1 h. The layers were separated, and the aqueous phase was extracted several times with DCM. The combined organic phase was dried by adding Na<sub>2</sub>SO<sub>4</sub> and silica gel, filtered, and concentrated to give **15** as white solid (47.9 mg, 78%). <sup>1</sup>H NMR (600 MHz, CDCl<sub>3</sub>) δ 7.86-7.85 (m, 2H), 7.78 (d, *J* = 9.0 Hz, 1H), 7.75-7.72 (m, 2H), 6.98-6.97 (m, 1H), 6.93-6.92 (m, 1H), 5.08 (dd, *J* = 8.7, 5.7 Hz, 1H), 3.91 (s, 3H), 3.57-3.52 (m, 1H), 3.39-3.36 (m, 1H); <sup>13</sup>C NMR (150 MHz, CDCl<sub>3</sub>) δ 198.02, 167.55, 165.95, 153.86, 134.16, 132.02, 128.14, 126.27, 123.50, 115.94, 109.77, 55.74, 53.68, 31.89; HRMS (ESI-TOF) Calcd for C<sub>18</sub>H<sub>14</sub>NO<sub>4</sub> [M+H]<sup>+</sup>: 308.0917; found: 308.0917.

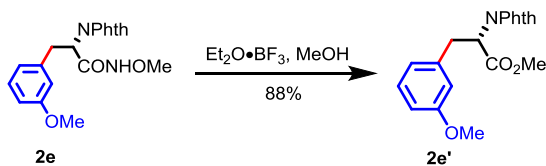

**Methyl (S)-2-(1,3-dioxoisindolin-2-yl)-3-(3-methoxyphenyl)propanoate (2e')**

The scale-up procedure followed. <sup>1</sup>H NMR (600 MHz, CDCl<sub>3</sub>) δ 7.80-7.77 (m, 2H), 7.71-7.67 (m, 2H), 7.09 (t, *J* = 8.0 Hz, 1H), 6.75 (d, *J* = 7.8 Hz, 1H), 6.70-6.66 (m, 2H), 5.17 (dd, *J* = 11.4, 5.4 Hz, 1H), 3.78 (s, 3H), 3.67 (s, 3H), 3.60-3.50 (m, 2H); <sup>13</sup>C NMR (150 MHz, CDCl<sub>3</sub>) δ 169.33, 167.42, 159.60, 138.23, 134.10, 131.61, 129.54, 123.47, 121.13, 114.08, 112.70, 55.06, 53.13, 52.91, 34.64; HRMS (ESI-TOF) Calcd for C<sub>19</sub>H<sub>18</sub>NO [M+H]<sup>+</sup>: 340.1179; found: 340.1177.

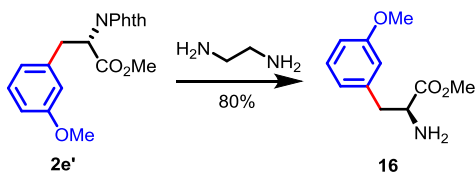

### Methyl (*S*)-2-amino-3-(3-methoxyphenyl)propanoate (**16**)

The scale-up procedure followed.  $^1\text{H}$  NMR (600 MHz,  $\text{CDCl}_3$ )  $\delta$  7.22 (t,  $J = 7.8$  Hz, 1H), 6.80-6.77 (m, 2H), 6.74 (t,  $J = 1.8$  Hz, 1H), 3.79 (s, 3H), 3.75-3.73 (m, 1H), 3.73 (s, 3H), 3.08 (dd,  $J = 13.2, 5.1$  Hz, 1H), 2.83 (dd,  $J = 13.5, 8.0$  Hz, 1H);  $^{13}\text{C}$  NMR (150 MHz,  $\text{CDCl}_3$ )  $\delta$  175.38, 159.72, 138.78, 129.56, 121.60, 114.96, 112.19, 55.77, 55.16, 52.01, 41.13; HRMS (ESI-TOF) Calcd for  $\text{C}_{11}\text{H}_{15}\text{NO}_3$   $[\text{M}+\text{H}]^+$ : 209.1052; found: 210.1125.

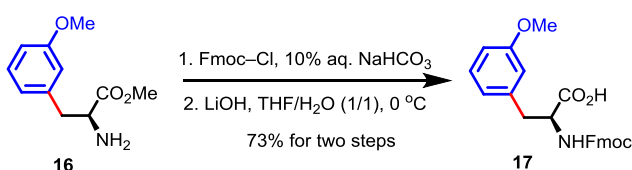

### (*S*)-2-(((9H-Fluoren-9-yl)methoxy)carbonyl)amino)-3-(3-methoxyphenyl)propanoic acid (**17**)

The scale-up procedure followed.  $^1\text{H}$  NMR (600 MHz, MeOD)  $\delta$  7.74 (d,  $J = 7.8$  Hz, 2H), 7.55 (d,  $J = 6.6$  Hz, 2H), 7.35 (t,  $J = 7.5$  Hz, 2H), 7.27-7.23 (m, 2H), 7.16 (t,  $J = 7.8$  Hz, 1H), 6.83-6.81 (m, 2H), 6.74 (dd,  $J = 8.1, 2.7$  Hz, 1H), 4.44 (dd,  $J = 9.6, 4.8$  Hz, 1H), 4.27 (dd,  $J = 10.8, 7.2$  Hz, 1H), 4.17 (dd,  $J = 10.2, 7.2$  Hz, 1H), 4.12-4.10 (m, 1H), 3.71 (s, 3H), 3.19 (dd,  $J = 13.9, 4.5$  Hz, 1H), 2.91 (dd,  $J = 13.8, 9.6$  Hz, 1H);  $^{13}\text{C}$  NMR (150 MHz, MeOD)  $\delta$  175.46, 161.19, 158.41, 145.25, 142.56, 142.54, 140.25, 130.47, 128.80, 128.21, 126.41, 126.29, 122.67, 120.95, 120.92, 115.99, 113.30, 68.10, 56.91, 55.63, 48.35, 38.72; HRMS (ESI-TOF) Calcd for  $\text{C}_{25}\text{H}_{24}\text{NO}_5$   $[\text{M}+\text{H}]^+$ : 418.1649; found: 418.1647.

### Lactamization of different substrates:

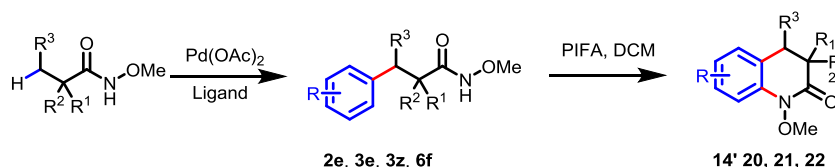

**General procedure:** Amide (0.1 mmol) was dissolved in DCM (2 mL), in an ice-cooled flask. Phenyliodine(III) bis(trifluoroacetate) (PIFA, 0.15 mmol) was added in one portion and the reaction mixture was stirred at 0 °C, and monitored by TLC. After completion of the reaction (about 3h), the mixture was diluted with DCM (4 mL) and washed with a saturated aqueous NaHCO<sub>3</sub> solution, then with saturated aqueous sodium chloride solution, dried over sodium sulfate, filtered and concentrated *in vacuo*. The resulting yellow oil was purified by silica gel chromatography using hexanes/EtOAc (5/1 to 3/1 to 2/1) as the eluent.

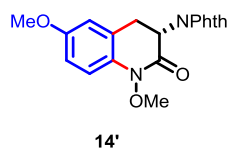

**(S)-2-(1,6-Dimethoxy-2-oxo-1,2,3,4-tetrahydroquinolin-3-yl)isoindoline-1,3-dione (14')**

White solid, 75% yield. (For the NMR data, please see the previous one in the section of Diverse Synthetic Application)

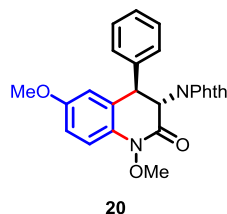

**(S)-2-(1,6-Dimethoxy-2-oxo-1,2,3,4-tetrahydroquinolin-3-yl)isoindoline-1,3-dione compound with 2-((3S,4R)-1,6-dimethoxy-2-oxo-4-phenyl-1,2,3,4-tetrahydroquinolin-3-yl)isoindoline-1,3-dione (1:1) (20)**

White solid, 82% yield. <sup>1</sup>H NMR (600 MHz, CDCl<sub>3</sub>) δ 7.76-7.73 (m, 2H), 7.67-7.64 (m, 2H), 7.31-7.22 (m, 6H), 6.86 (dd, *J* = 8.7, 2.7 Hz, 1H), 6.18-6.17 (m, 1H), 5.36 (d, *J* = 14.4 Hz, 1H), 5.20 (d, *J* = 14.4 Hz, 1H), 4.01 (s, 3H), 3.66 (s, 3H); <sup>13</sup>C NMR (150 MHz, CDCl<sub>3</sub>) δ 167.48, 160.67, 156.41, 136.46, 134.02, 131.59, 130.29, 129.16, 129.04, 128.08, 127.67, 123.49, 114.95, 113.82, 112.44, 62.84, 55.47, 54.23, 44.90; HRMS (ESI-TOF) Calcd for C<sub>25</sub>H<sub>21</sub>N<sub>2</sub>O<sub>5</sub> [M+H]<sup>+</sup>: 429.1445; found: 429.1449.

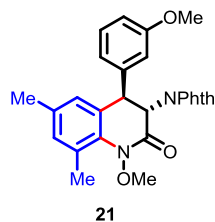

**2-((3*S*,4*R*)-1-Methoxy-4-(3-methoxyphenyl)-6,8-dimethyl-2-oxo-1,2,3,4-tetrahydroquinolin-3-yl)isoindoline-1,3-dione (21)**

White solid, 94% yield.  $^1\text{H}$  NMR (600 MHz,  $\text{CDCl}_3$ )  $\delta$  7.75-7.73 (m, 2H), 7.65-7.63 (m, 2H), 7.20 (t,  $J = 7.8$  Hz, 1H), 6.96 (s, 1H), 6.81-6.80 (m, 1H), 6.77-6.75 (m, 2H), 6.21 (s, 1H), 5.36 (d,  $J = 13.8$  Hz, 1H), 5.21 (d,  $J = 14.4$  Hz, 1H), 3.84 (s, 3H), 3.72 (s, 3H), 2.45 (s, 3H), 2.16 (s, 3H);  $^{13}\text{C}$  NMR (150 MHz,  $\text{CDCl}_3$ )  $\delta$  167.53, 162.41, 159.83, 138.15, 135.05, 133.99, 132.66, 132.39, 131.59, 130.17, 129.93, 127.60, 125.88, 123.45, 121.62, 113.99, 61.95, 55.22, 54.20, 45.33, 20.79, 20.73; HRMS (ESI-TOF) Calcd for  $\text{C}_{27}\text{H}_{25}\text{N}_2\text{O}_5$   $[\text{M}+\text{H}]^+$ : 457.1758; found: 457.1756.

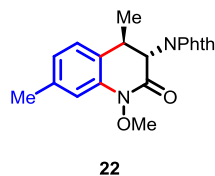

**2-((3*S*)-1-Methoxy-4,7-dimethyl-2-oxo-1,2,3,4-tetrahydroquinolin-3-yl)isoindoline-1,3-dione (22)**

White solid, 39% yield.  $^1\text{H}$  NMR (600 MHz,  $\text{CDCl}_3$ )  $\delta$  7.92-7.89 (m, 2H), 7.78-7.76 (m, 2H), 7.18 (d,  $J = 7.8$  Hz, 1H), 7.13 (s, 1H), 6.97 (d,  $J = 7.8$  Hz, 1H), 4.72 (d,  $J = 13.8$  Hz, 1H), 3.98 (s, 3H), 3.95-3.89 (m, 1H), 2.41 (s, 3H), 1.34 (d,  $J = 6.6$  Hz, 3H);  $^{13}\text{C}$  NMR (150 MHz,  $\text{CDCl}_3$ )  $\delta$  167.85, 161.80, 138.45, 136.59, 134.27, 131.86, 125.46, 124.95, 123.66, 122.90, 113.12, 62.90, 55.27, 31.71, 21.39, 14.35; HRMS (ESI-TOF) Calcd for  $\text{C}_{20}\text{H}_{19}\text{N}_2\text{O}_4$   $[\text{M}+\text{H}]^+$ : 351.1339; found: 351.1340.

## Synthesis of PyBOX and BOX ligands.

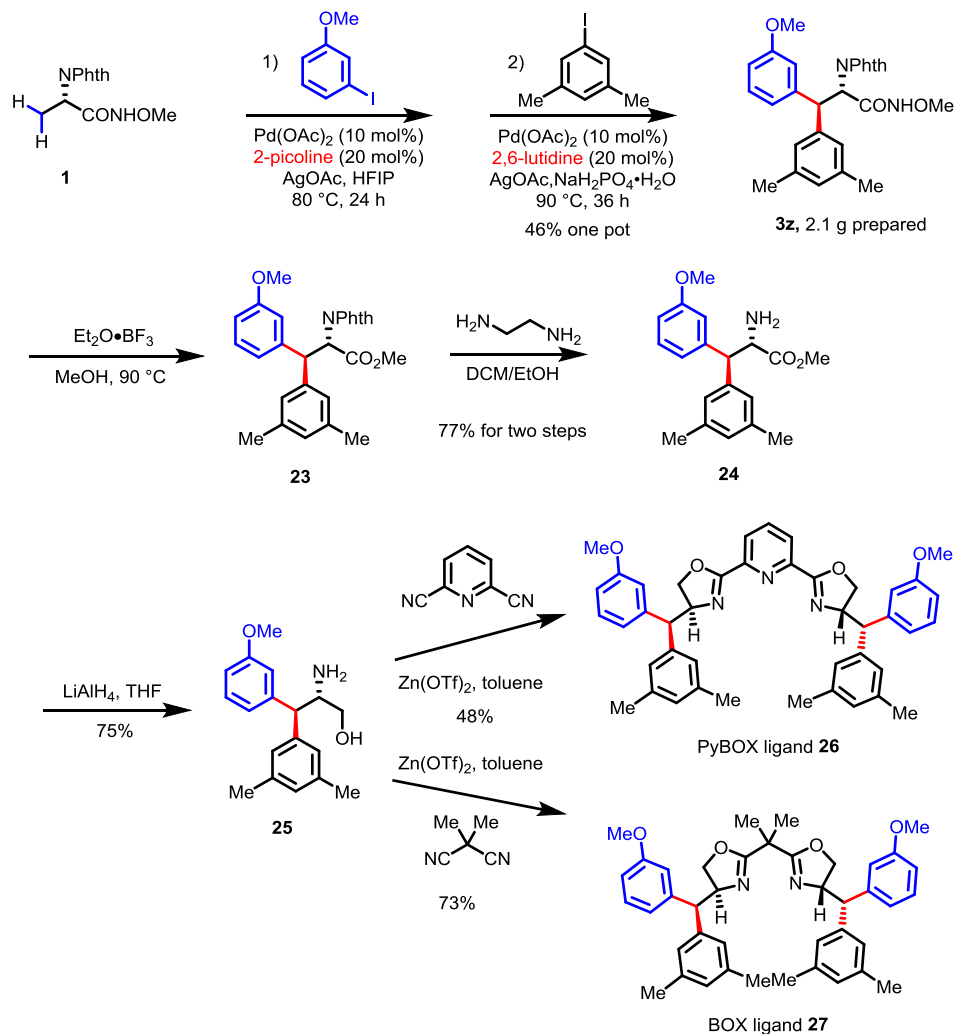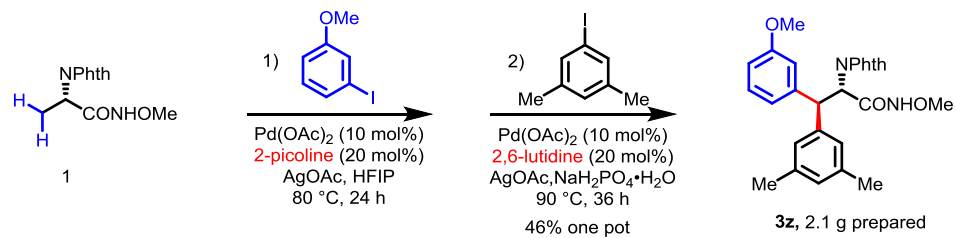

**(2*R*, 3*S*)-3-(3,5-Dimethylphenyl)-2-(1,3-dioxo-2,3-dihydro-1H-inden-2-yl)-*N*-methoxy-3-(3-methoxyphenyl)propanamide (**3z**)**

The starting material **1** (10.0 mmol, 2.48 g), Pd(OAc)<sub>2</sub> (1.0 mmol, 220 mg), and AgOAc (20.0 mmol, 3.34 g) were weighed in air and placed in a sealed tube (350 mL) with a magnetic stir bar. To the reaction mixture, aryl iodide (12 mmol), 2-picoline (2.00 mmol, 0.2 mL), HFIP (100 mL) were added. The reaction mixture was first stirred at room temperature for 10 min and then heated to 75 °C for 24 hours under vigorous stirring. Upon completion, the reaction mixture was cooled to room temperature. To the reaction mixture, Pd(OAc)<sub>2</sub> (1.0 mmol, 220 mg), NaH<sub>2</sub>PO<sub>4</sub>•H<sub>2</sub>O (30 mmol, 4.2 g), AgOAc (20 mmol, 3.34 g), the second aryl iodide (30 mmol) and 2,6-lutidine (2 mmol, 0.2 mL) were added. The reaction mixture was first stirred at room temperature for 10 min and then heated to 100 °C for another 36 hours under vigorous stirring. Upon completion, the reaction mixture was cooled to room temperature, filtered with celite using DCM. The solvents were removed under reduced pressure and the resulting mixture was purified by a silica gel-packed flash chromatography column using hexanes/EtOAc (5/1 to 3/1 to 2/1) as the eluent to afford **3z** (2.1 g, 46% overall yield). (For the NMR data, please see the previous one in the section of Hetero-Diarylation).

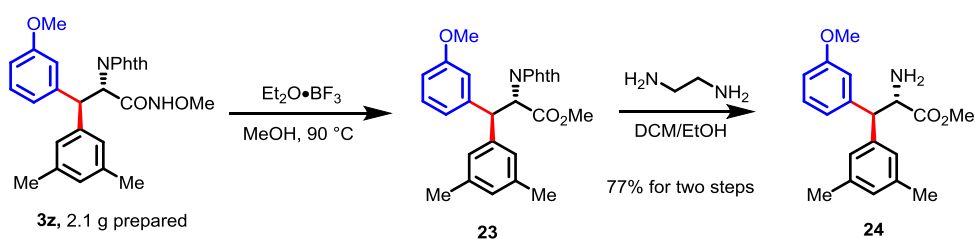

**(2*R*, 3*S*)-Methyl 3-(3,5-dimethylphenyl)-2-(1,3-dioxo-2,3-dihydro-1*H*-inden-2-yl)-3-(3-methoxyphenyl)propanoate (23)**

A sealable pressure flask was charged with MeOH (120 mL) and crude amide **3z** (4.57 mmol, 2.1 g). Et<sub>2</sub>O•BF<sub>3</sub> (27.4 mmol) was added and the reaction vessel sealed. The reaction mixture was heated to 100 °C for 12 hours under vigorous stirring. Upon completion, the reaction



mixture was cooled to room temperature. The solvents were removed under reduced pressure and H<sub>2</sub>O and EtOAc was added, organic layers were removed and the aqueous layer was then extracted with EtOAc and the combined organics washed with brine, dried over MgSO<sub>4</sub>, filtered and concentrated.

**(2*S*, 3*S*)-Methyl 2-amino-3-(3,5-dimethylphenyl)-3-(3-methoxyphenyl)propanoate (24)**

The crude **23** was dissolved in a 1:1 mixture of DCM/MeOH (40 mL total), and ethylenediamine (22.9 mmol) was added. The reaction mixture was heated to 40 °C for 6 h, and then cooled to room temperature. After removing the solvent *in vacuo*, the residue was purified by column chromatography (DCM/MeOH = 20/1 to 10/1). **24** was obtained as gray solid (1.1 g, 77% yield for two steps). <sup>1</sup>H NMR (600 MHz, CDCl<sub>3</sub>) δ 7.24 (t, *J* = 7.8 Hz, 1H), 6.90-6.89 (m, 3H), 6.85 (t, *J* = 2.1 Hz, 1H), 6.81 (s, 1H), 6.77 (dd, *J* = 8.1, 2.1 Hz, 1H), 4.19-4.14 (m, 2H), 3.78 (s, 3H), 3.54 (s, 3H), 2.25 (s, 6H); <sup>13</sup>C NMR (150 MHz, CDCl<sub>3</sub>) δ 174.84, 159.75, 142.20, 140.98, 137.81, 129.69, 128.49, 125.82, 120.98, 114.97, 111.84, 58.84, 56.36, 55.15, 51.80, 21.37; HRMS (ESI-TOF) Calcd for C<sub>19</sub>H<sub>24</sub>NO<sub>3</sub> [M+H]<sup>+</sup>: 314.1751; found: 314.1749.

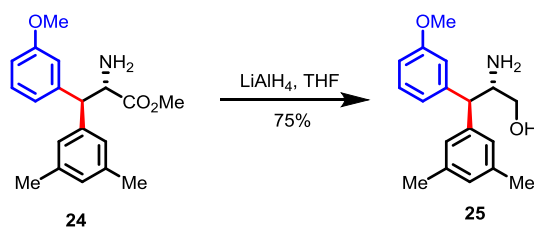

**(2*S*, 3*S*)-2-Amino-3-(3,5-dimethylphenyl)-3-(3-methoxyphenyl)propan-1-ol (25)**

To a suspension of LAH (5 mL, 1M in THF) in THF (10 mL) at 0 °C was added dropwise a solution of the ester (535 mg, 1.70 mmol) in THF (10 mL). The mixture was reacted less than 15 min and then cooled to 0 °C. The mixture was then treated dropwise with water (3 mL) and 10% aqueous sodium hydroxide (3 mL). Note: extreme care should be practiced during the quenching process. *As this process is exothermic and produces flammable hydrogen gas, it is highly advisable to cool the reaction mixture to 0 °C prior to quenching and to add the water and aqueous solution of sodium hydroxide cautiously.* The mixture was filtered over Na<sub>2</sub>SO<sub>4</sub>, and the filtrate was evaporated under reduced pressure, purified by column chromatography

(DCM/MeOH = 20/1 to 10/1). **25** was obtained as white solid (363 mg, 75%).  $^1\text{H}$  NMR (600 MHz,  $\text{CDCl}_3$ )  $\delta$  7.24 (t,  $J$  = 7.8 Hz, 1H), 6.95 (d,  $J$  = 7.8 Hz, 1H), 6.90-6.88 (m, 2H), 6.81 (s, 1H), 6.75-6.73 (m, 1H), 3.79 (s, 3H), 3.65-3.63 (m, 2H), 3.57-3.55 (m, 1H), 3.30-3.27 (m, 1H), 2.25 (s, 6H), 1.93 (br, 3H);  $^{13}\text{C}$  NMR (150 MHz,  $\text{CDCl}_3$ )  $\delta$  159.91, 143.95, 141.67, 138.16, 129.94, 128.45, 125.55, 120.43, 114.54, 111.51, 64.76, 56.58, 55.58, 55.18, 21.38; HRMS (ESI-TOF) Calcd for  $\text{C}_{18}\text{H}_{24}\text{NO}_2$   $[\text{M}+\text{H}]^+$ : 286.1802; found: 286.1803.

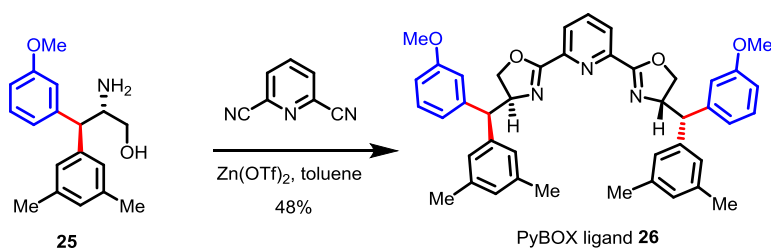

### 2,6-Bis((*S*)-4-((*S*)-(3,5-dimethylphenyl)(3-methoxyphenyl)methyl)-4,5-dihydrooxazol-2-yl)pyridine (**26**)

A 10-mL two-necked round-bottomed flask fitted with a reflux condenser was charged pyridine-2,6-dicarbonitrile (13 mg, 0.1 mmol) and the adequate amount of zinc triflate (40 mg, 0.1 mmol). The system was purged with argon and dry toluene (1 mL) was added. The solution was stirred for 5 min and a solution of the  $\beta$ -amino alcohol (62 mg, 0.1 mmol) in dry toluene (1.5 mL) was added. The solution was heated under reflux for 48 h. The system was allowed to cool, and reaction was diluted with 25 mL of EtOAc. The solution was then washed with brine ( $3 \times 25$  mL) and Saturated aq.  $\text{NaHCO}_3$  ( $3 \times 25$  mL), dried with  $\text{MgSO}_4$  and the solvent evaporated, and the crude product was purified by silica gel chromatography with EtOAc/hexanes (1/5 to 1/3) as the eluent, producing a yellow solid **26** (32.0 mg, 48%).  $^1\text{H}$  NMR (600 MHz,  $\text{CDCl}_3$ )  $\delta$  8.16 (d,  $J$  = 7.8 Hz, 2H), 7.78 (t,  $J$  = 8.1 Hz, 1H), 7.22 (t,  $J$  = 7.8 Hz, 2H), 6.96-6.94 (m, 2H), 6.90 (t,  $J$  = 2.1 Hz, 2H), 6.87 (s, 4H), 6.83 (s, 2H), 6.75-6.73 (m, 2H), 5.13-5.11 (m, 2H), 4.51 (t,  $J$  = 9.3 Hz, 2H), 4.17 (t,  $J$  = 8.4 Hz, 2H), 3.91 (d,  $J$  = 9.6 Hz, 2H), 3.77 (s, 6H), 2.26 (s, 12H);  $^{13}\text{C}$  NMR (150 MHz,  $\text{CDCl}_3$ )  $\delta$  162.81, 159.44, 146.73, 143.96, 141.42, 138.17, 137.07, 129.26, 128.61, 126.22, 126.19, 120.92, 114.94, 111.27, 72.35, 70.36, 57.10, 55.12, 21.39; HRMS (ESI-TOF) Calcd for  $\text{C}_{43}\text{H}_{44}\text{N}_3\text{O}_4$   $[\text{M}+\text{H}]^+$ : 666.3326; found 666.3326.

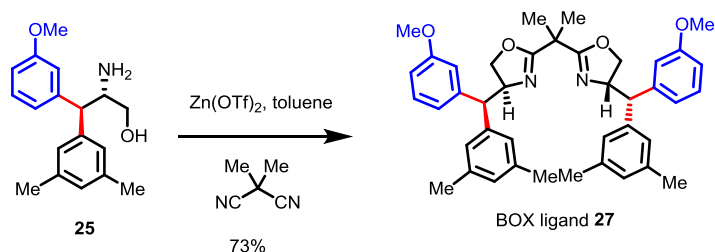

**(*S*, 4*S*, 4'*S*)-2,2'-(propane-2,2-diyl)bis(4-((*S*)-(3,5-dimethylphenyl)(3-methoxyphenyl)methyl)-4,5-dihydrooxazole) (27)**

A 10-mL two-necked round-bottomed flask fitted with a reflux condenser was charged with 2,2-dimethyl malononitrile (10 mg, 0.1 mmol) and zinc triflate (40 mg, 0.1 mmol). The system was purged with argon and dry toluene (1 mL) was added. The solution was stirred during 5 min and a solution of the  $\beta$ -amino alcohol **25** (57 mg, 0.2 mmol) in dry toluene (1 mL) was added. The solution was heated under reflux for 48 h. The system was allowed to cool. The reaction was then washed with brine ( $3 \times 25$  mL) and saturated aq.  $\text{NaHCO}_3$  ( $3 \times 20$  mL), dried with  $\text{MgSO}_4$  and the solvent evaporated, and the crude product was purified by silica gel chromatography, with EtOAc/hexanes (1/5 to 1/3) as the eluent, producing a yellow solid **27** (45.9 mg, 73%).  $^1\text{H}$  NMR (600 MHz,  $\text{CDCl}_3$ )  $\delta$  7.26 (d,  $J = 2.4$  Hz, 1H), 7.18-7.15 (m, 2H), 6.84-6.80 (m, 9H), 6.72-6.71 (m, 2H), 4.84-4.80 (m, 2H), 4.27-4.24 (m, 2H), 4.00-3.97 (m, 2H), 3.89 (d,  $J = 7.8$  Hz, 2H), 3.74 (s, 6H), 2.25 (s, 12H), 1.32 (s, 6H);  $^{13}\text{C}$  NMR (150 MHz,  $\text{CDCl}_3$ )  $\delta$  169.25, 159.26, 143.81, 141.32, 137.74, 128.99, 128.33, 126.72, 121.31, 115.27, 111.13, 71.50, 69.28, 56.20, 55.07, 38.60, 23.93, 21.38; HRMS (ESI-TOF) Calcd for  $\text{C}_{41}\text{H}_{47}\text{N}_2\text{O}_4$   $[\text{M}+\text{H}]^+$ : 631.3530; found: 631.3527.

## References:

- (1) Zhang, Q.; Chen, K.; Rao, W.; Zhang, Y.; Chen, F.-J.; Shi, B.-F. *Angew. Chem., Int. Ed.* **2013**, *52*, 13588.
- (2) Anzalone, A. V.; Wang, T. Y.; Chen, Z.; Cornish, V. W. *Angew. Chem., Int. Ed.* **2013**, *52*, 650.
- (3) Partridge, B. M.; Hartwig, J. F. *Org. Lett.* **2013**, *15*, 140.
- (4) Birch, A. M.; Kenny, P. W.; Oikonomakos, N. G.; Otterbein, L.; Schofield, P. R.; Whittamore, O.; Whalley, D. P. *Bioorg. Med. Chem. Lett.* **2007**, *17*, 394.
- (5) He, J.; Li, S.; Deng, Y.; Fu, H.; Laforteza, B. N.; Spangler, J. E.; Homs, A.; Yu, J.-Q. *Science* **2014**, *343*, 1216.
- (6) McClure, D. E.; Lumma, P. K.; Arison, B. H.; Jones, J. H.; Baldwin, J. J. *J. Org. Chem.* **1983**, *48*, 2675.
- (7) Cornejo, A.; Fraile, J. M.; García, J. I.; Gil, M. J.; Martínez-Merino, V.; Mayoral, J. A.; Pires, E.; Villalba, I. *Synlett* **2005**, 2321.

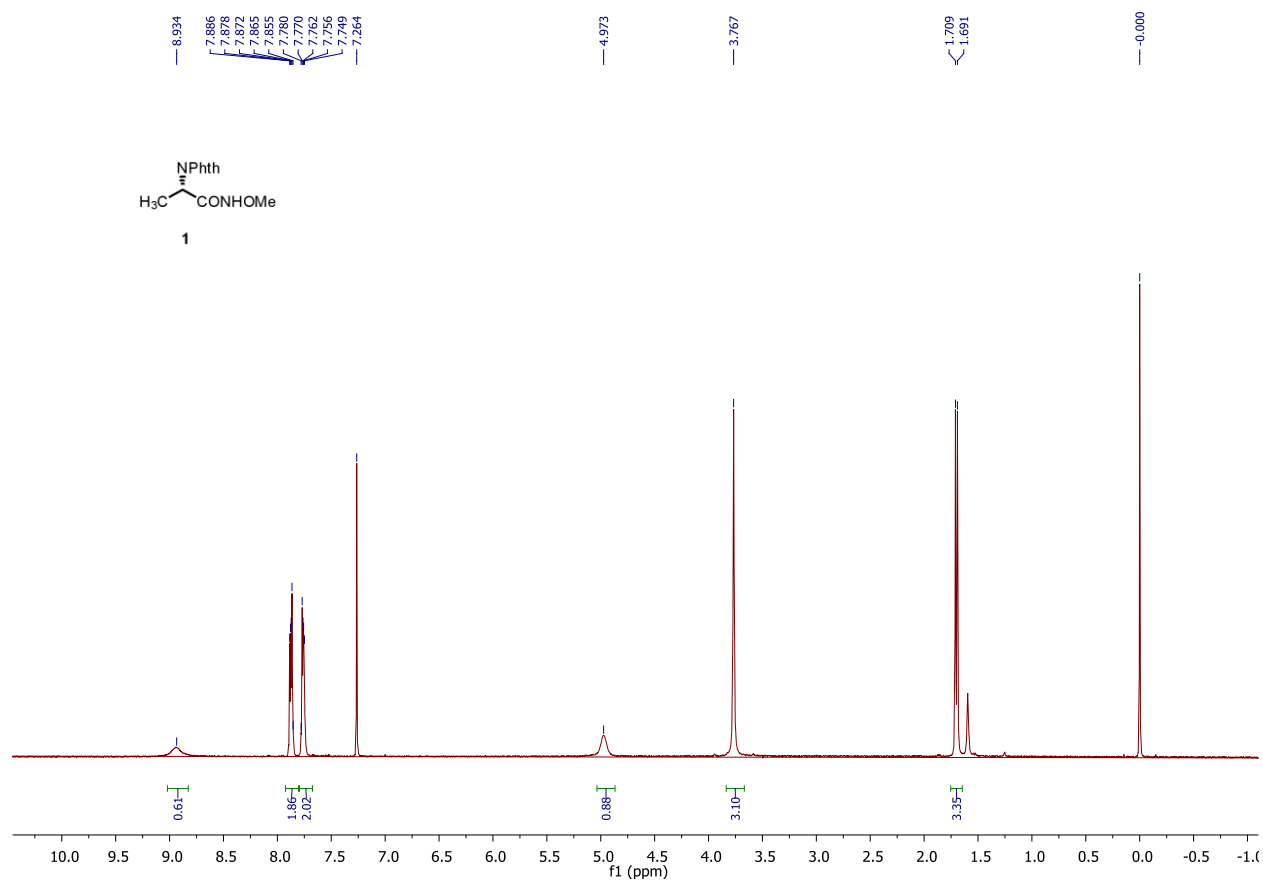

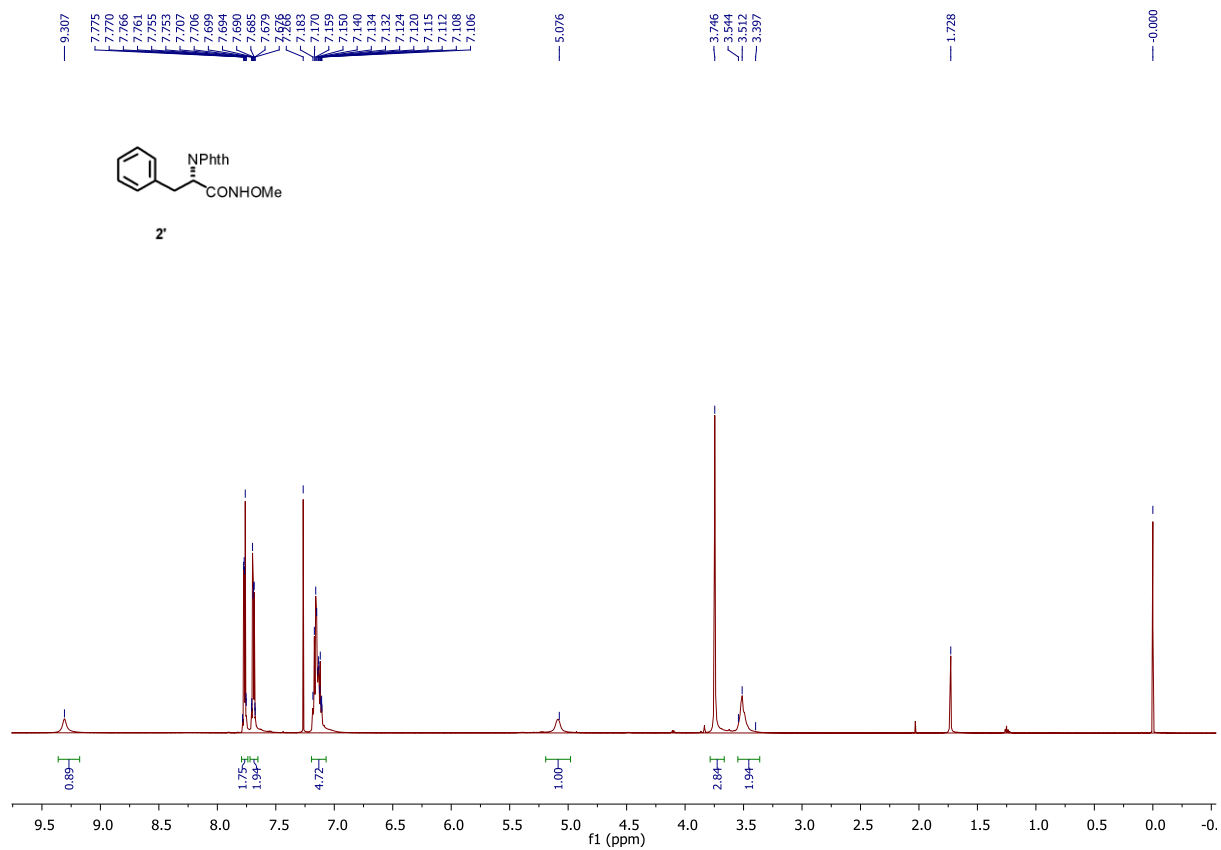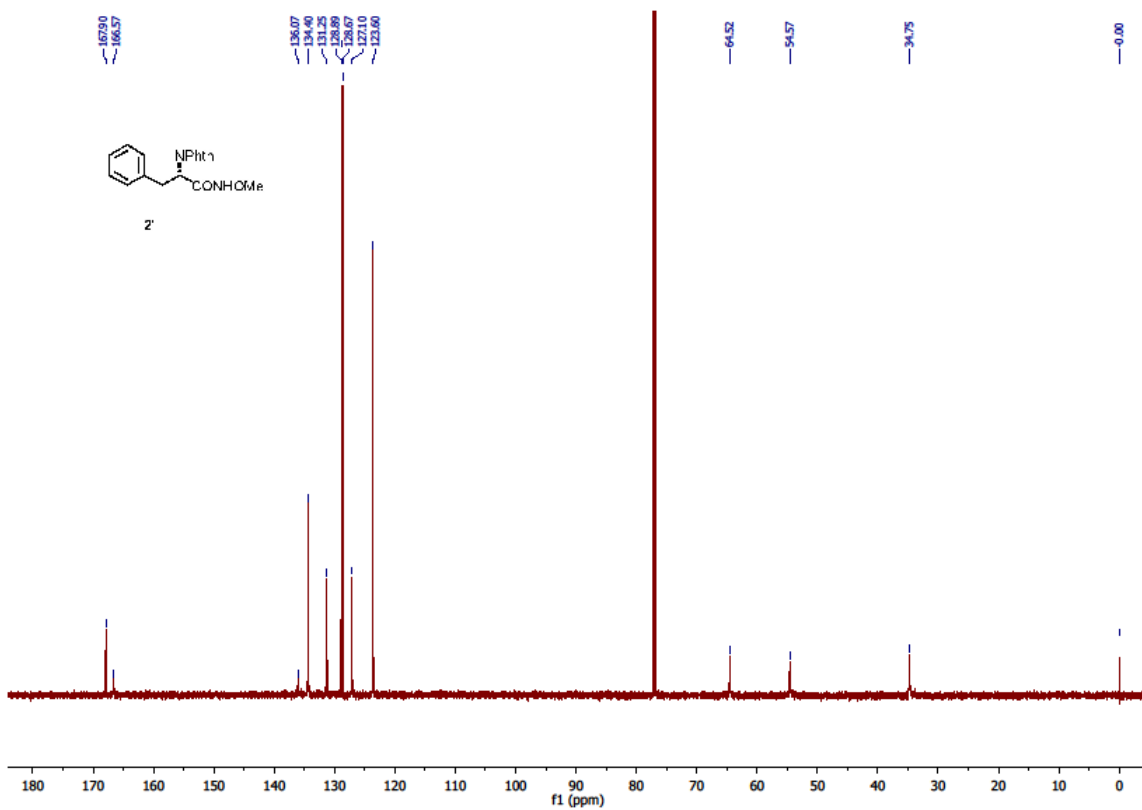

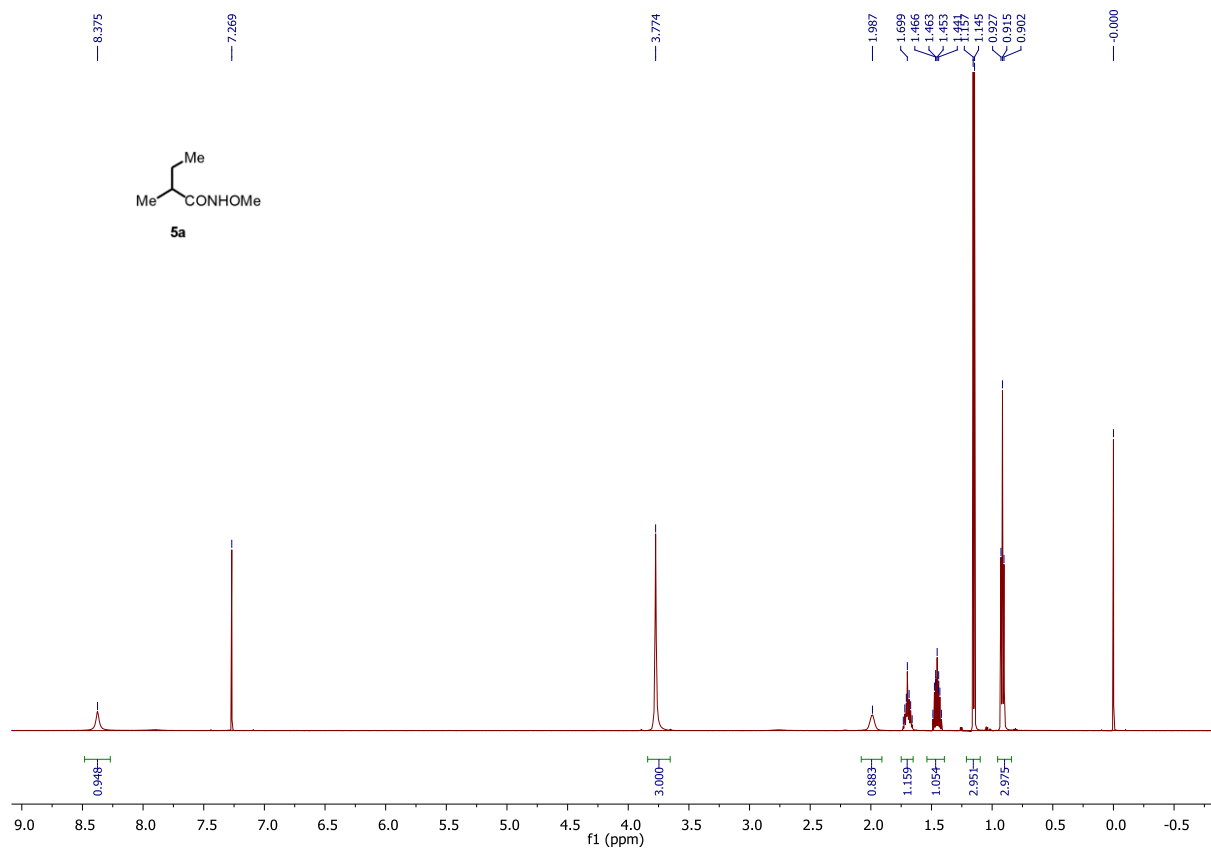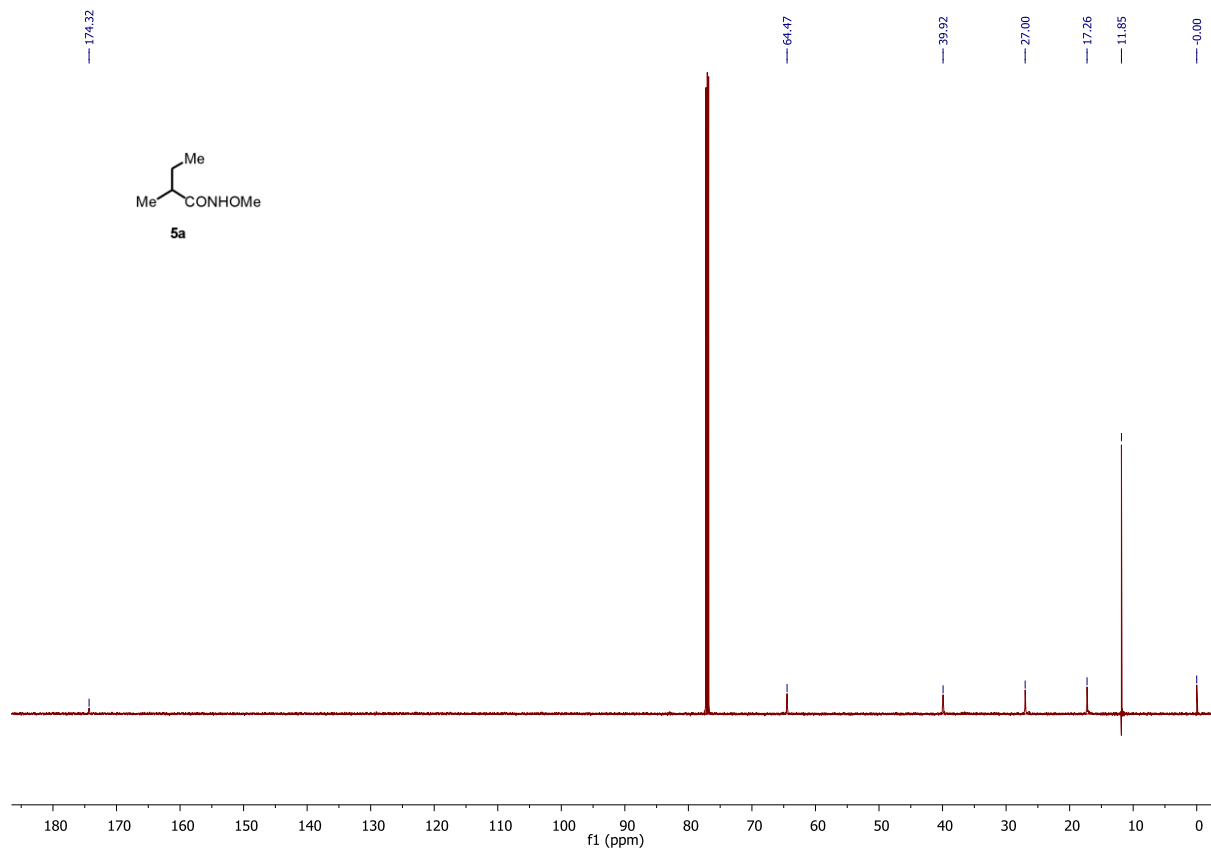

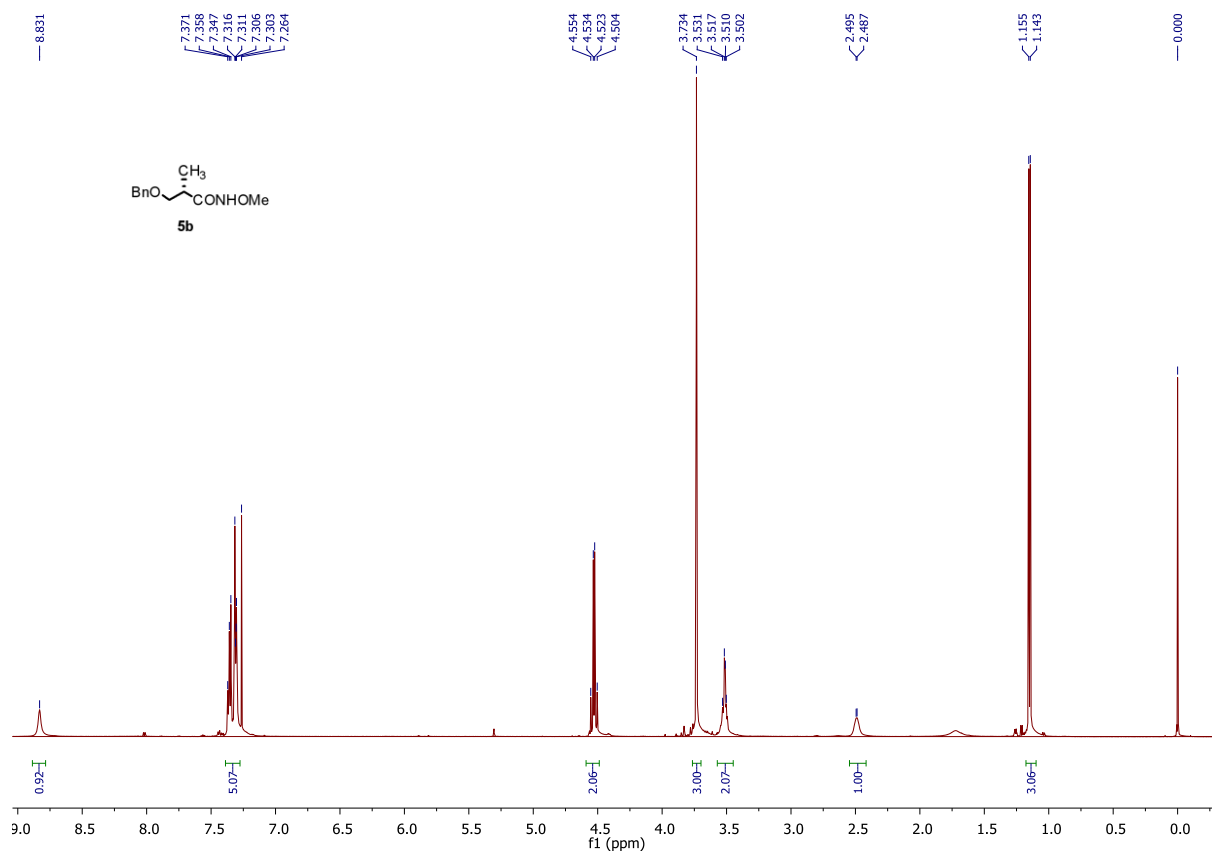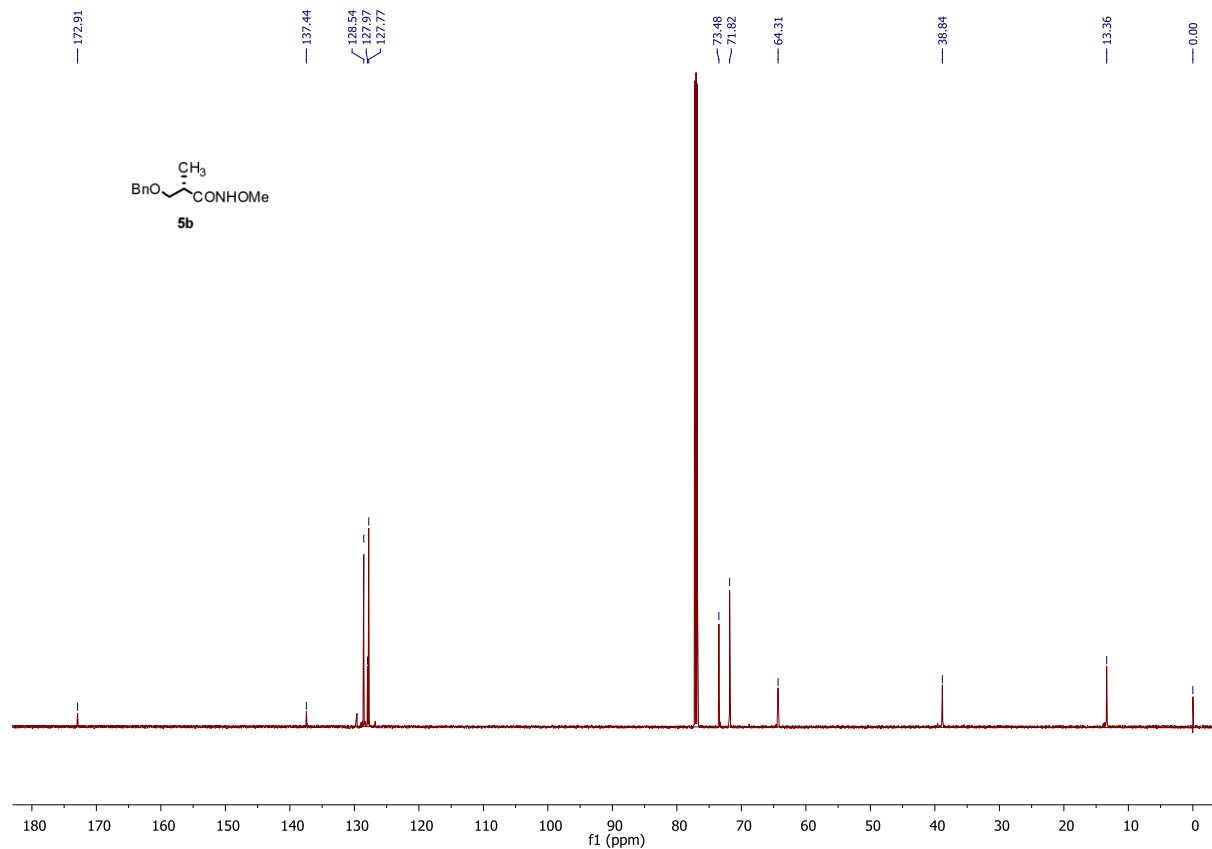



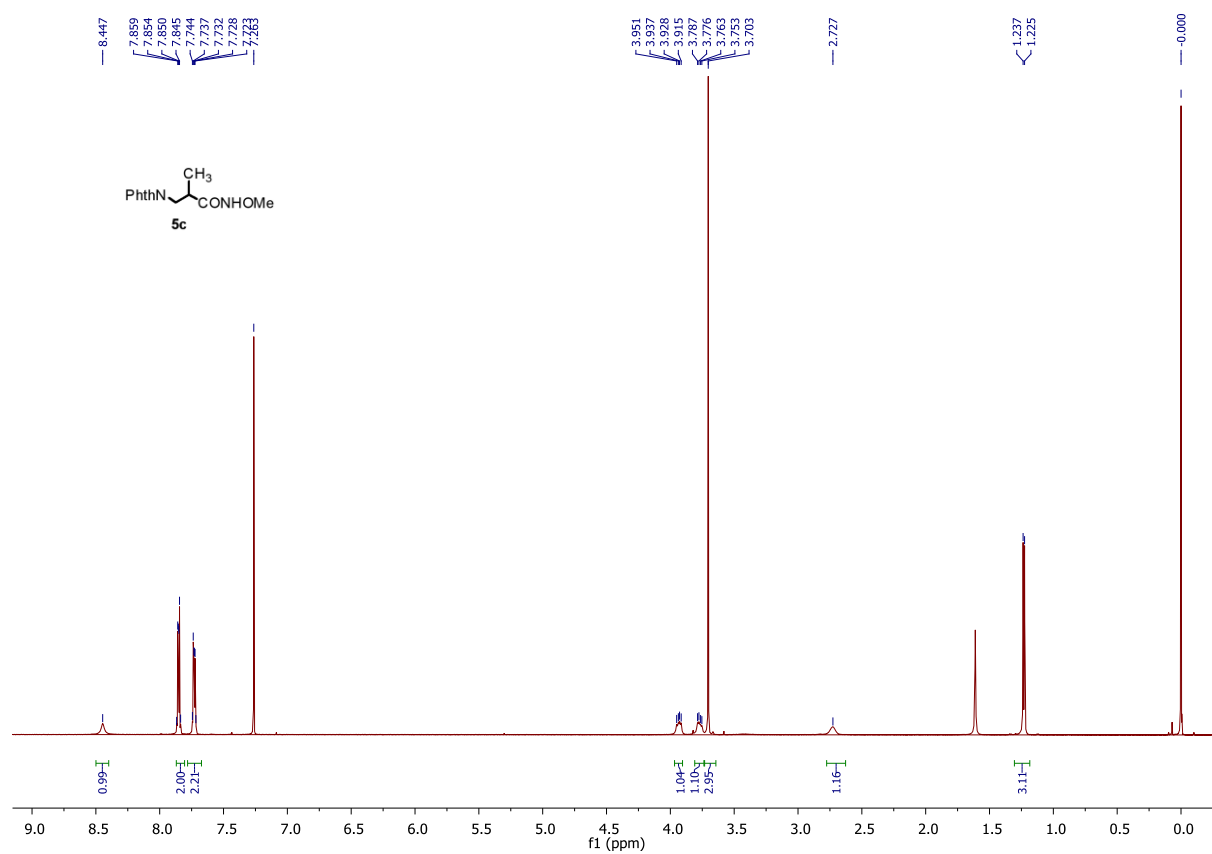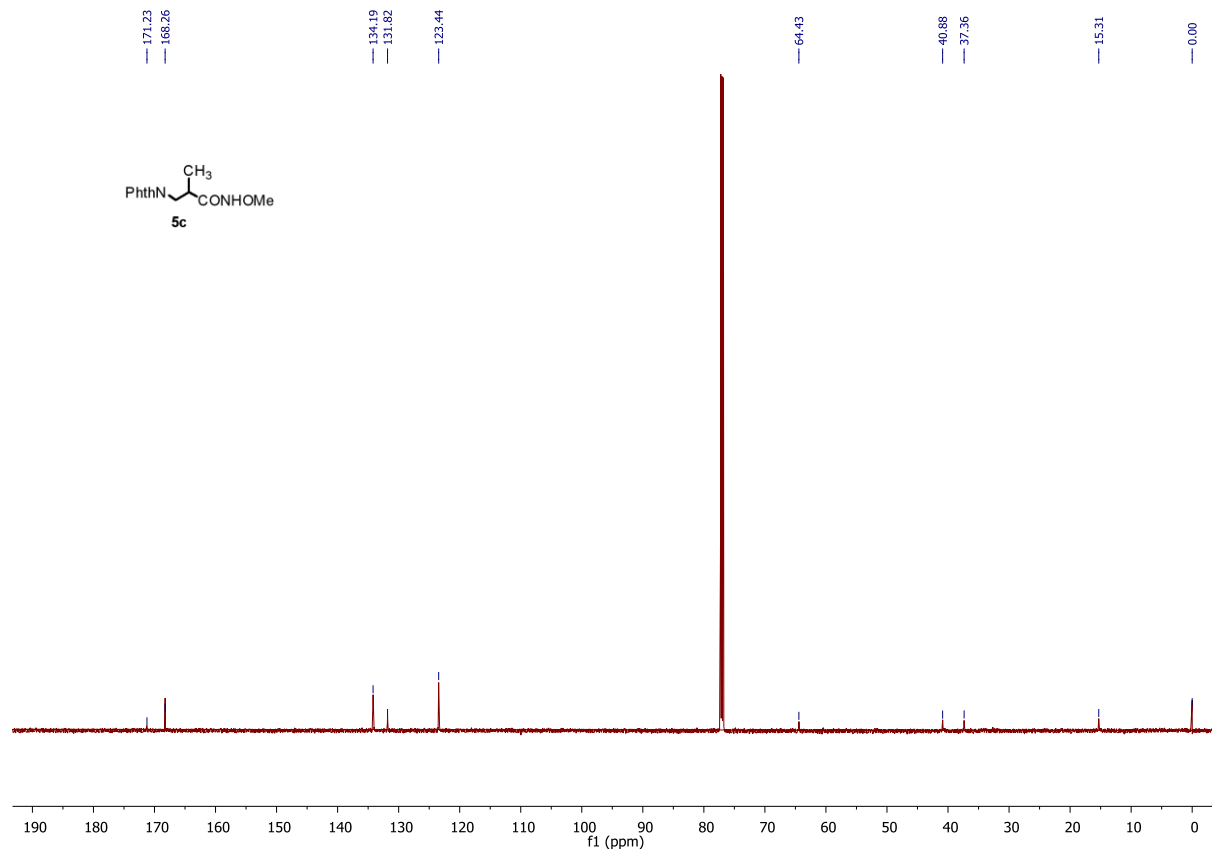

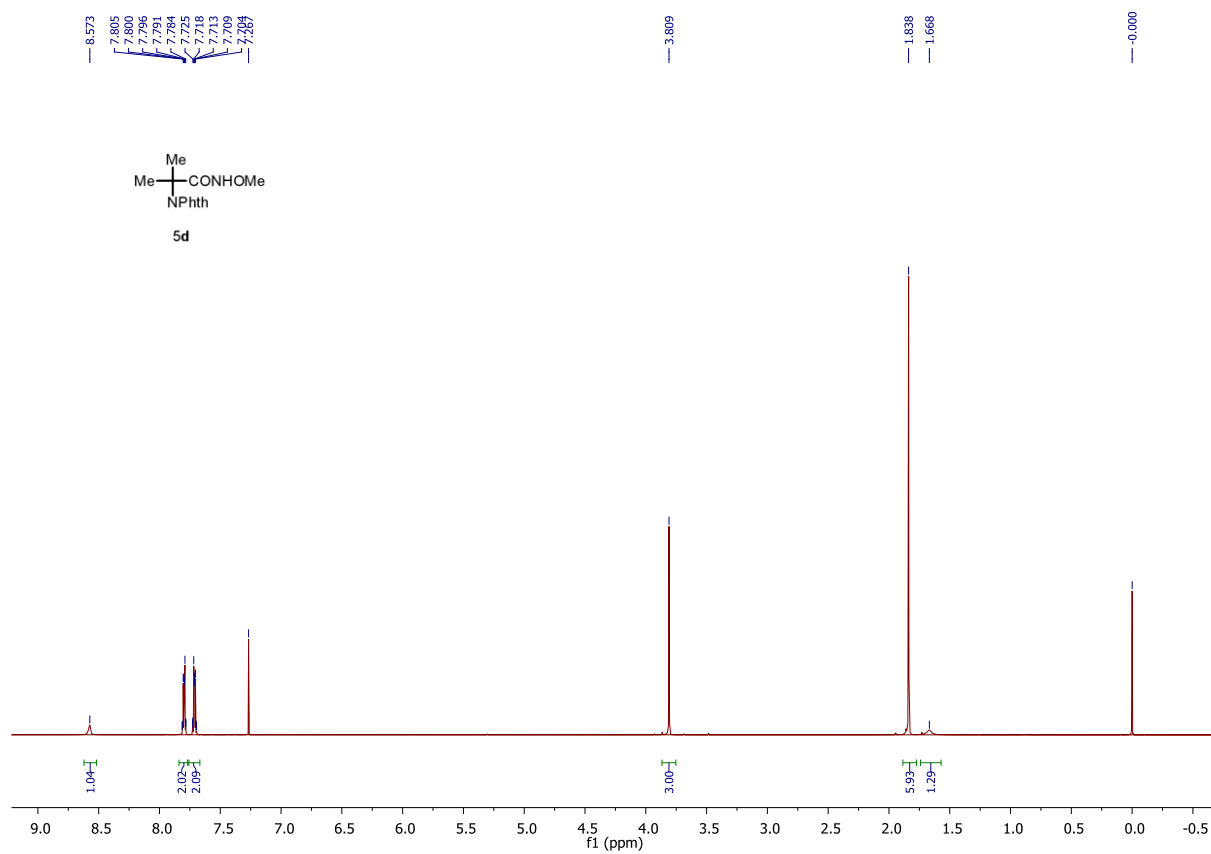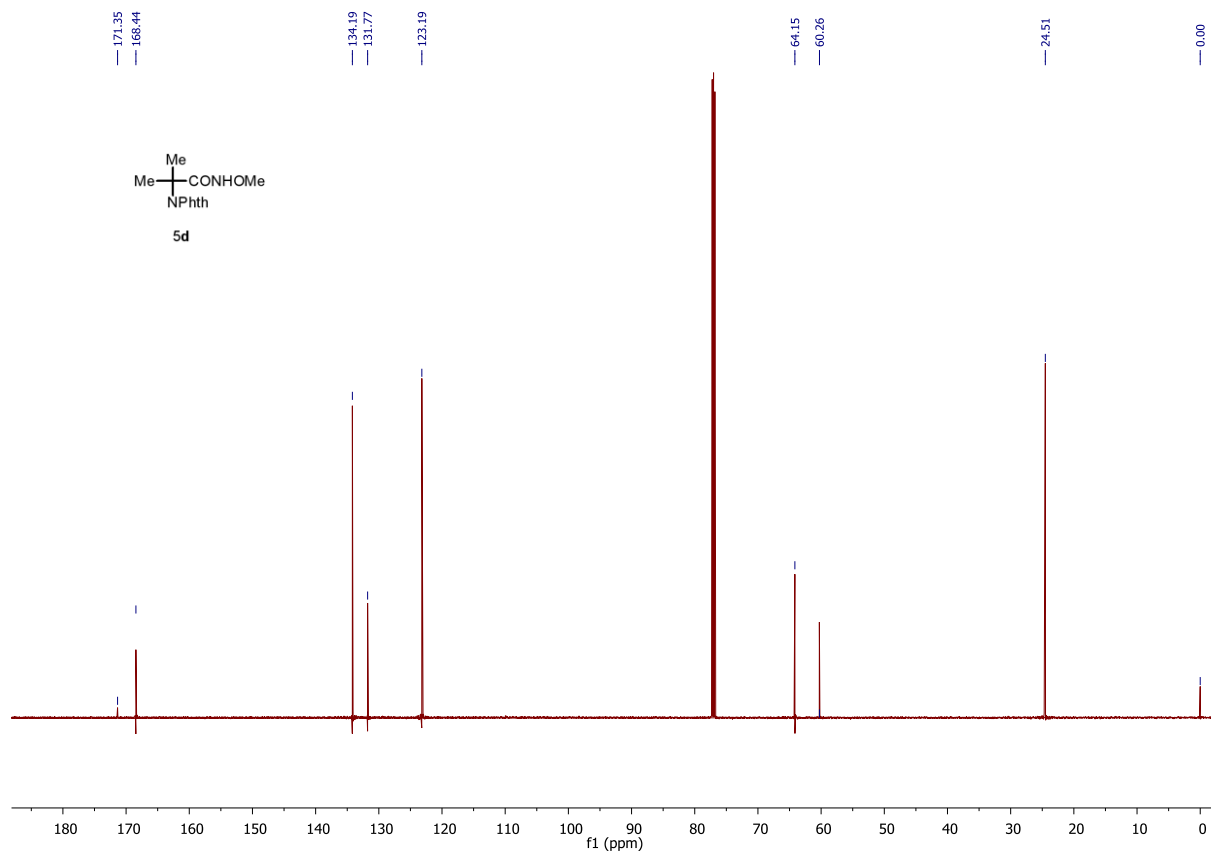

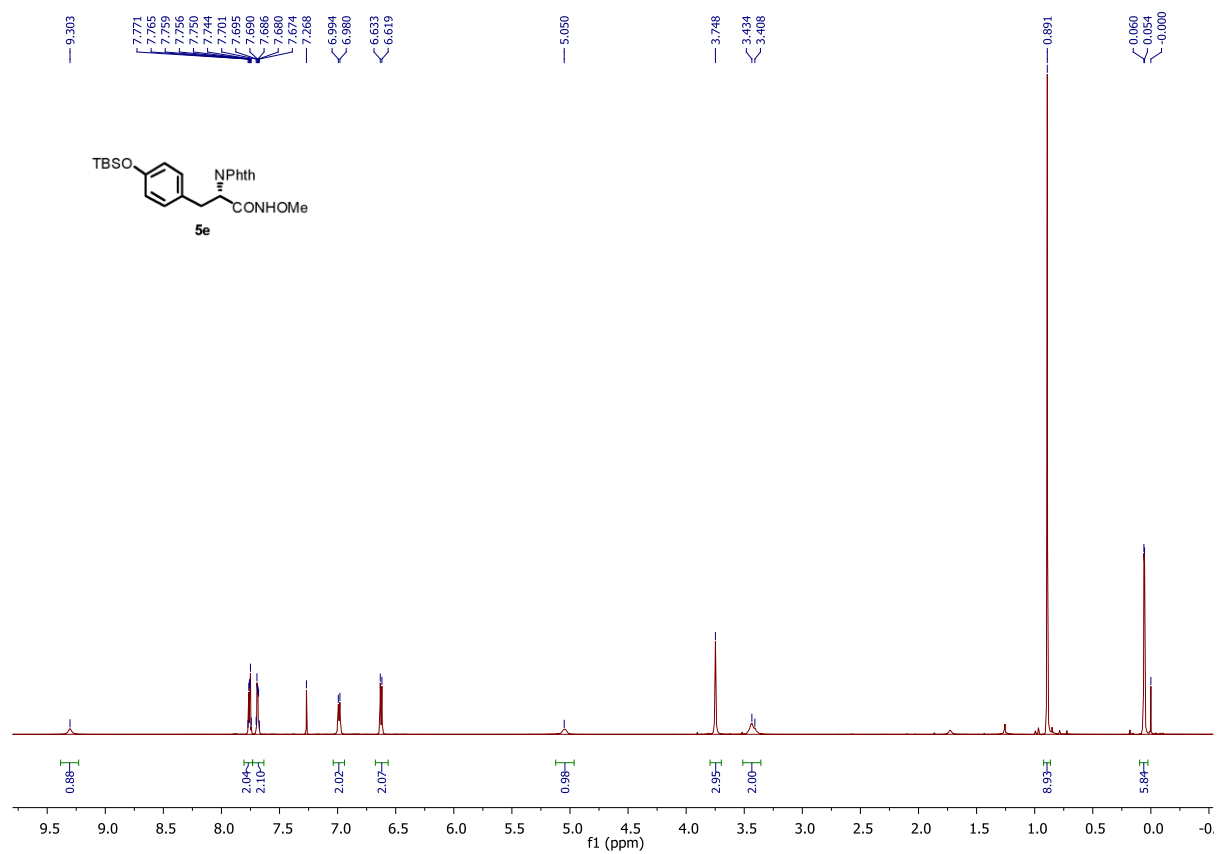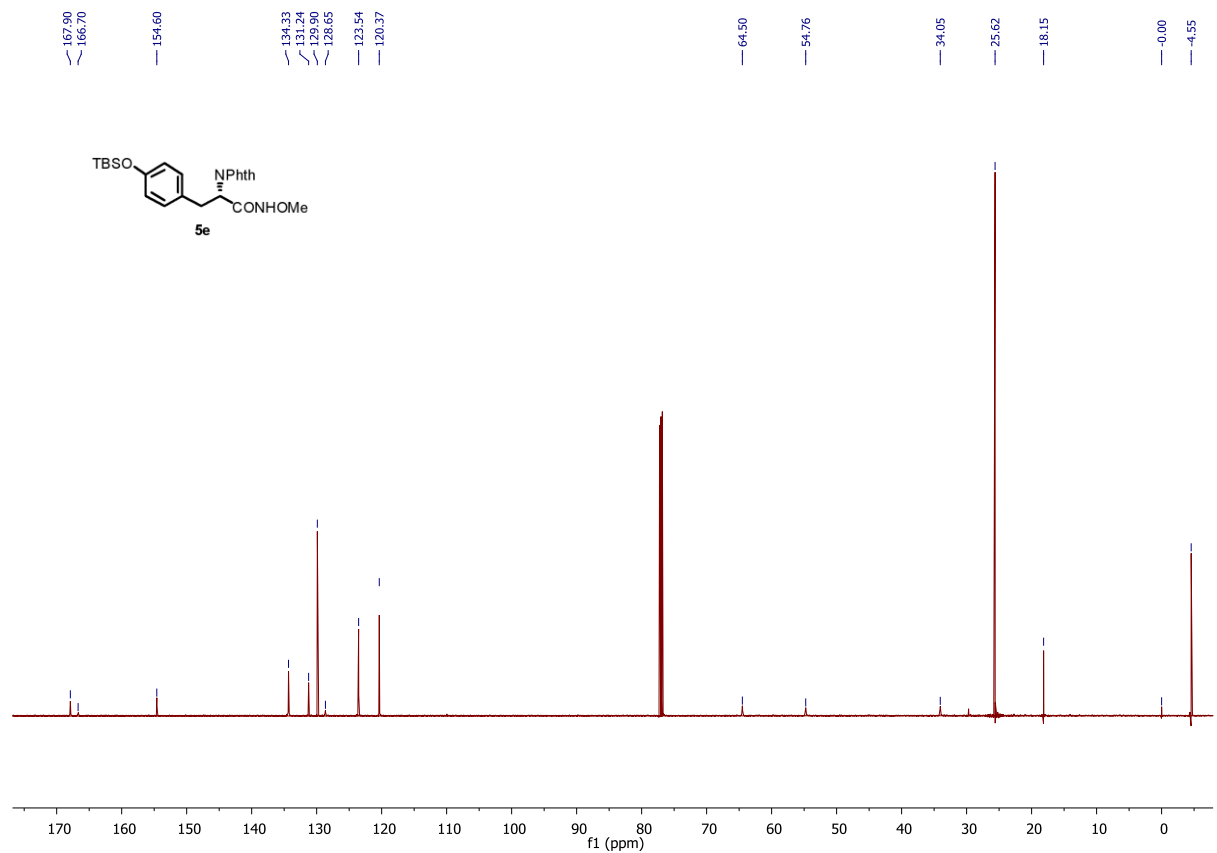

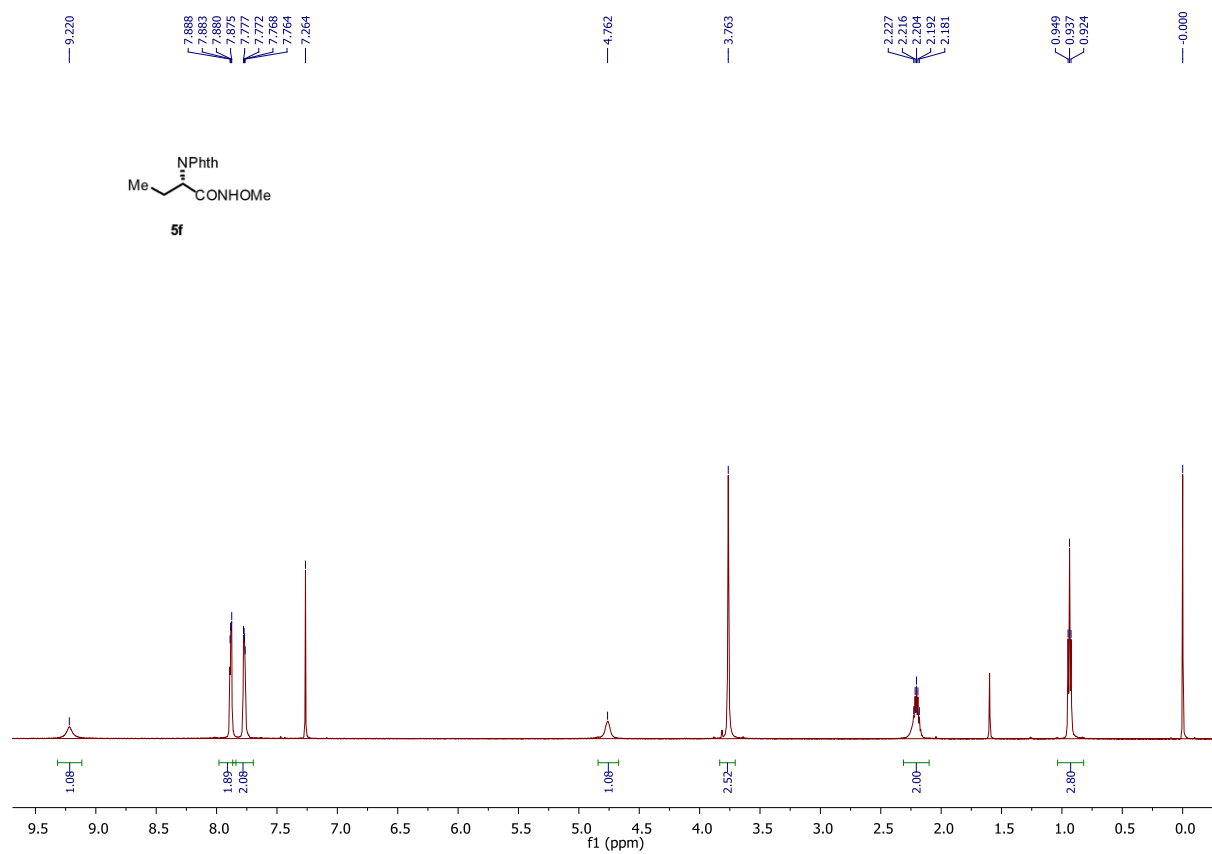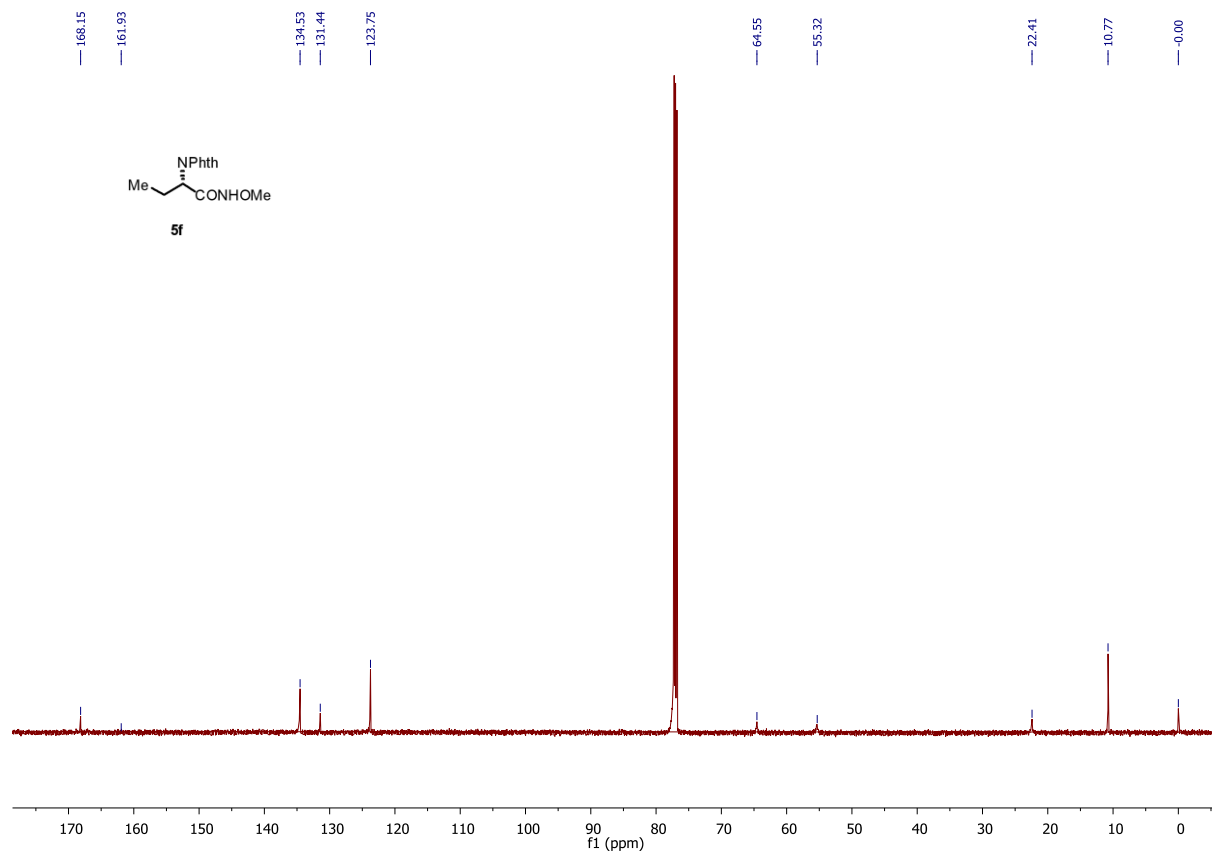

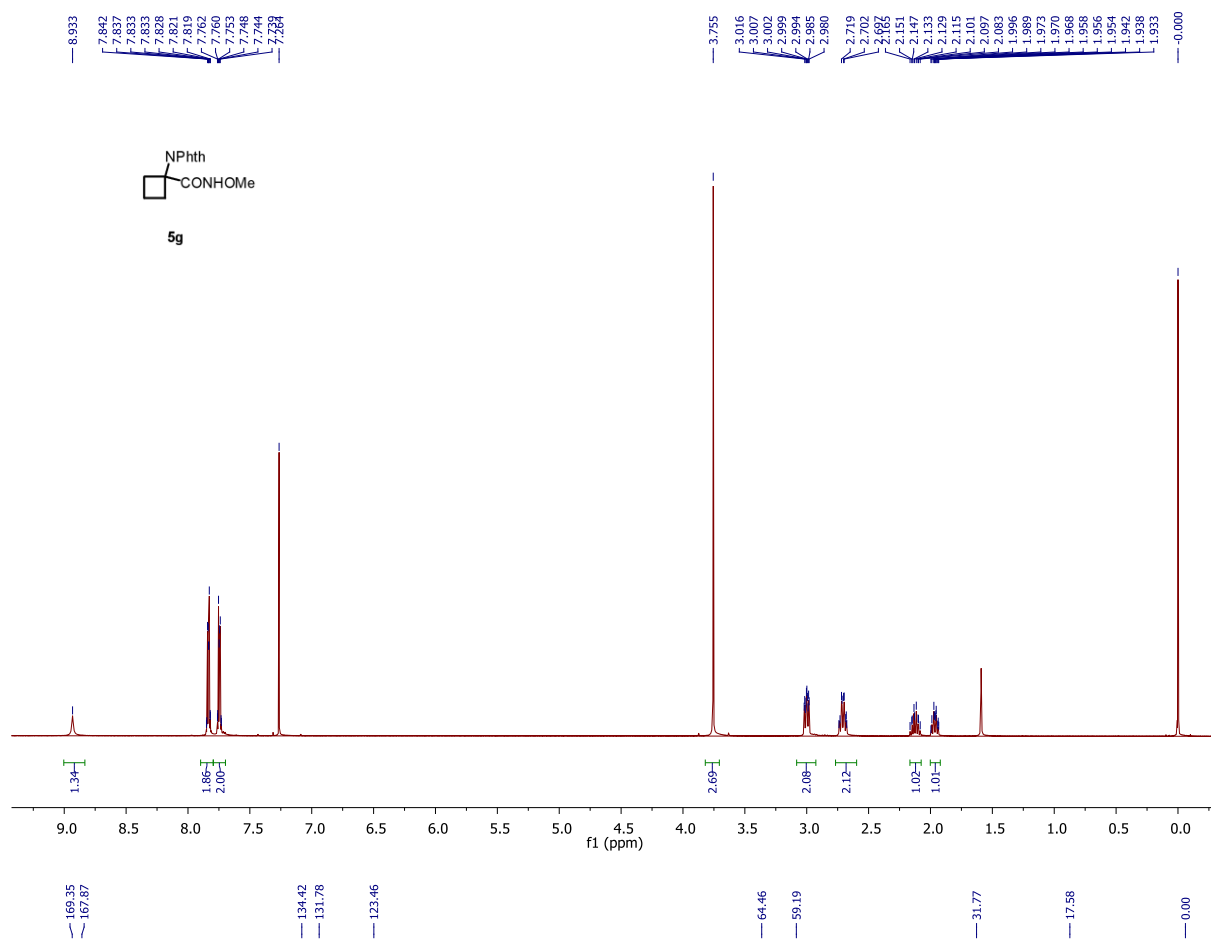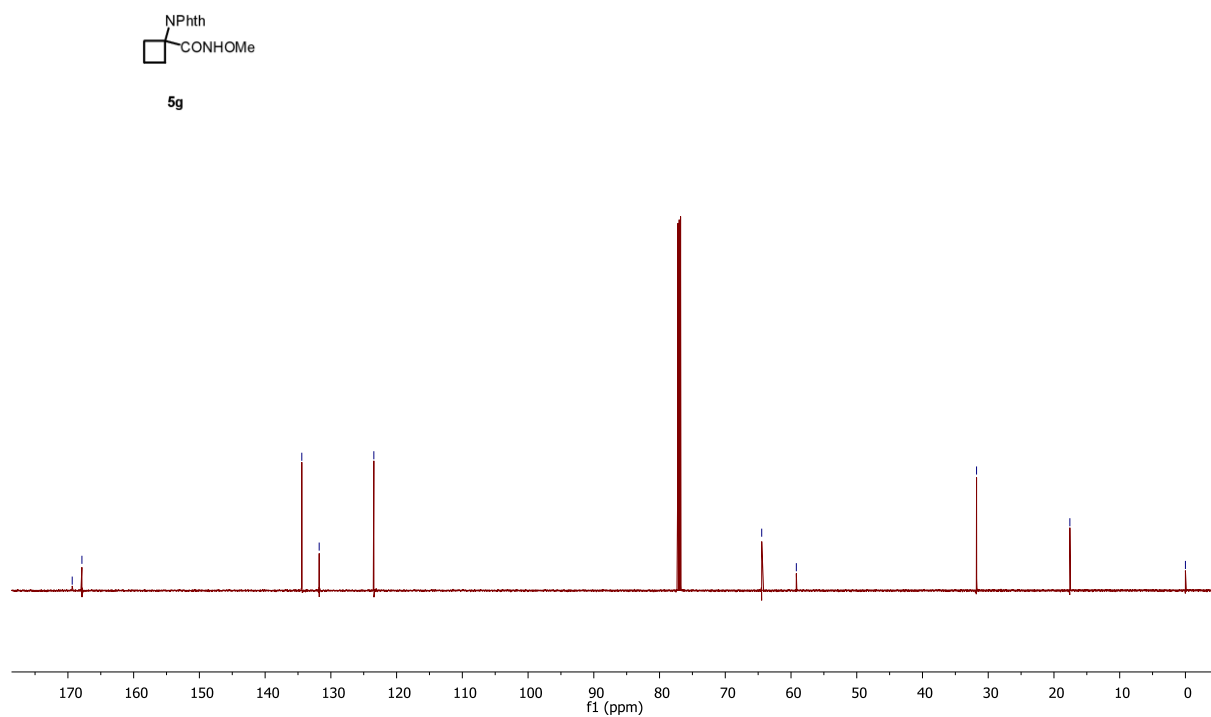

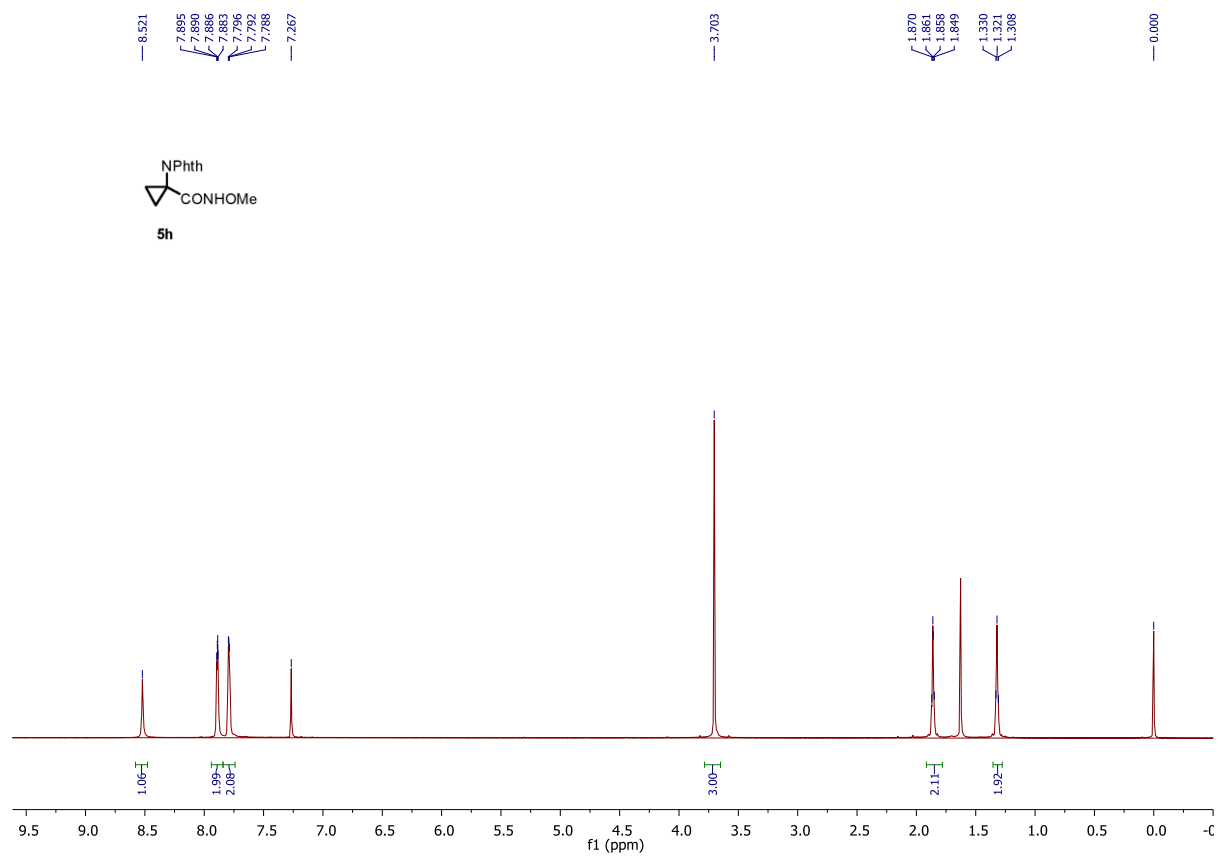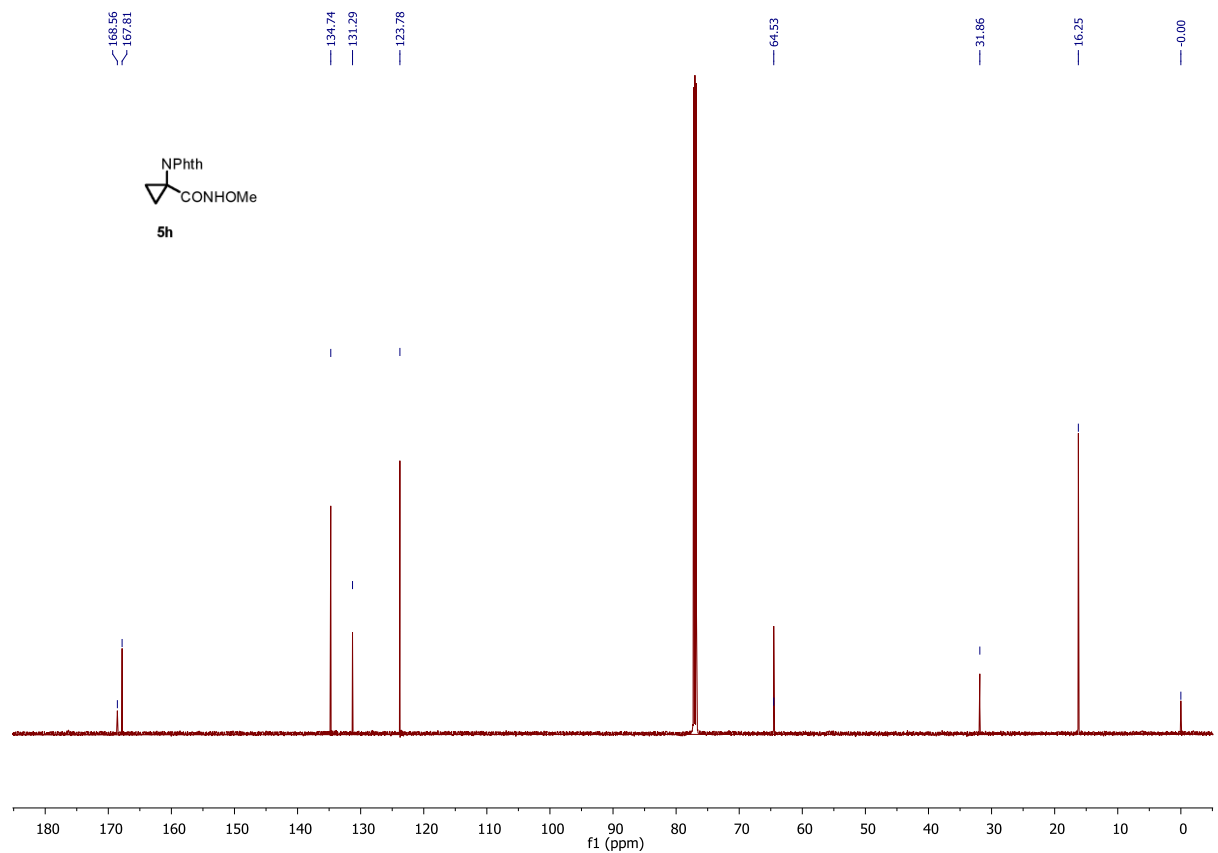

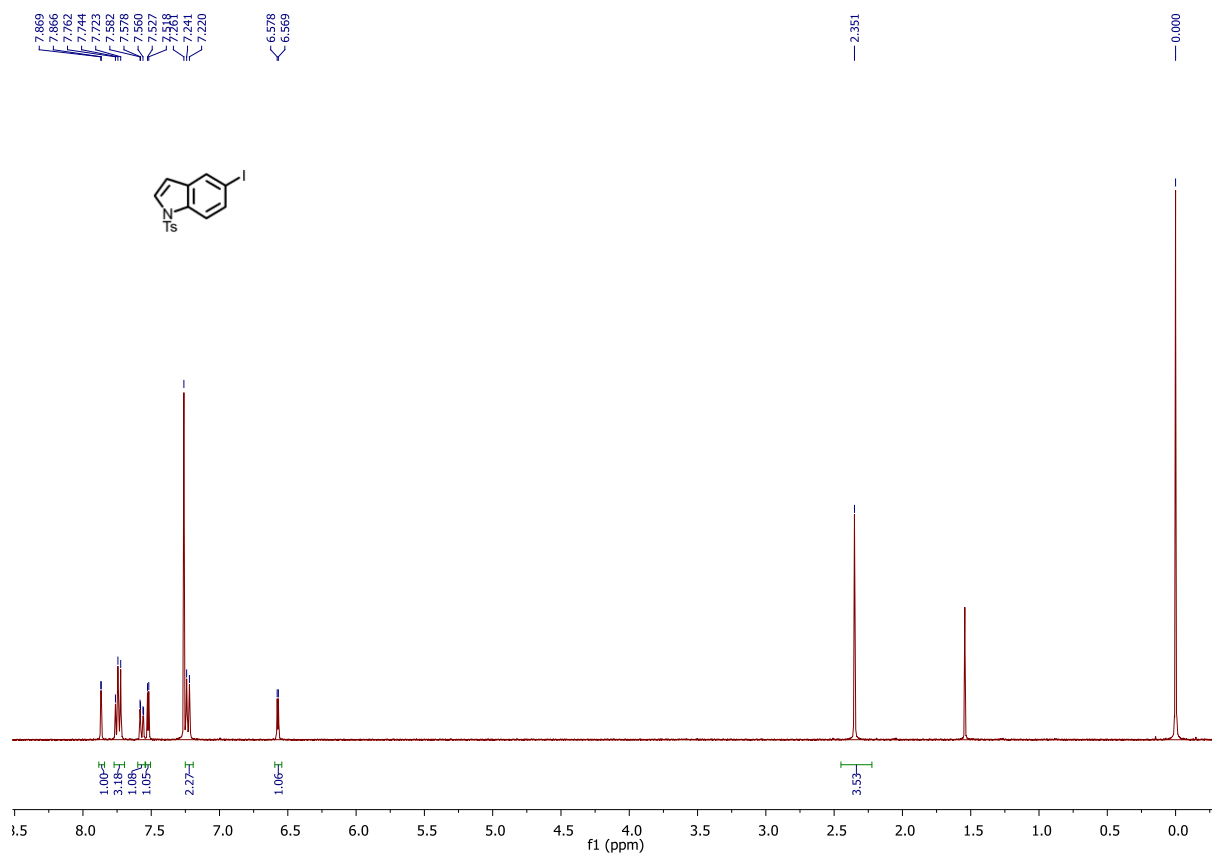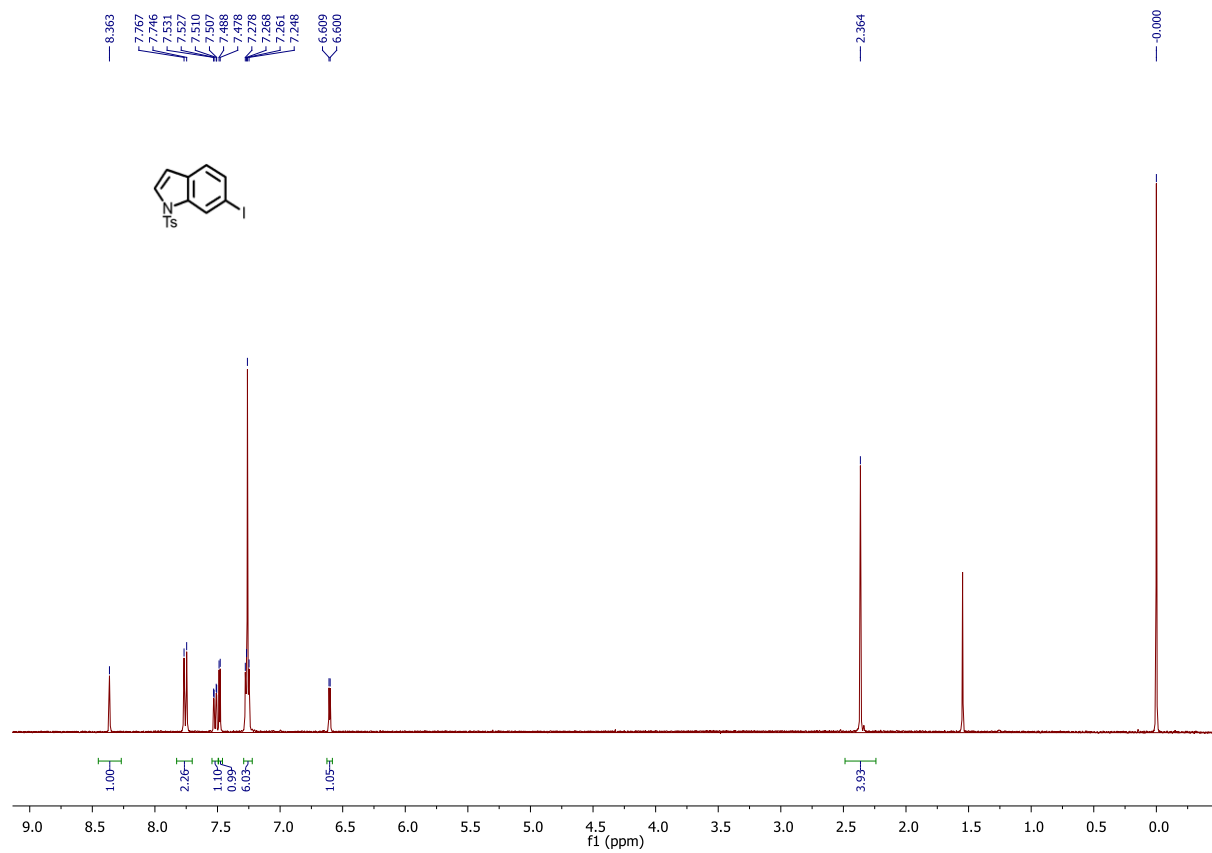

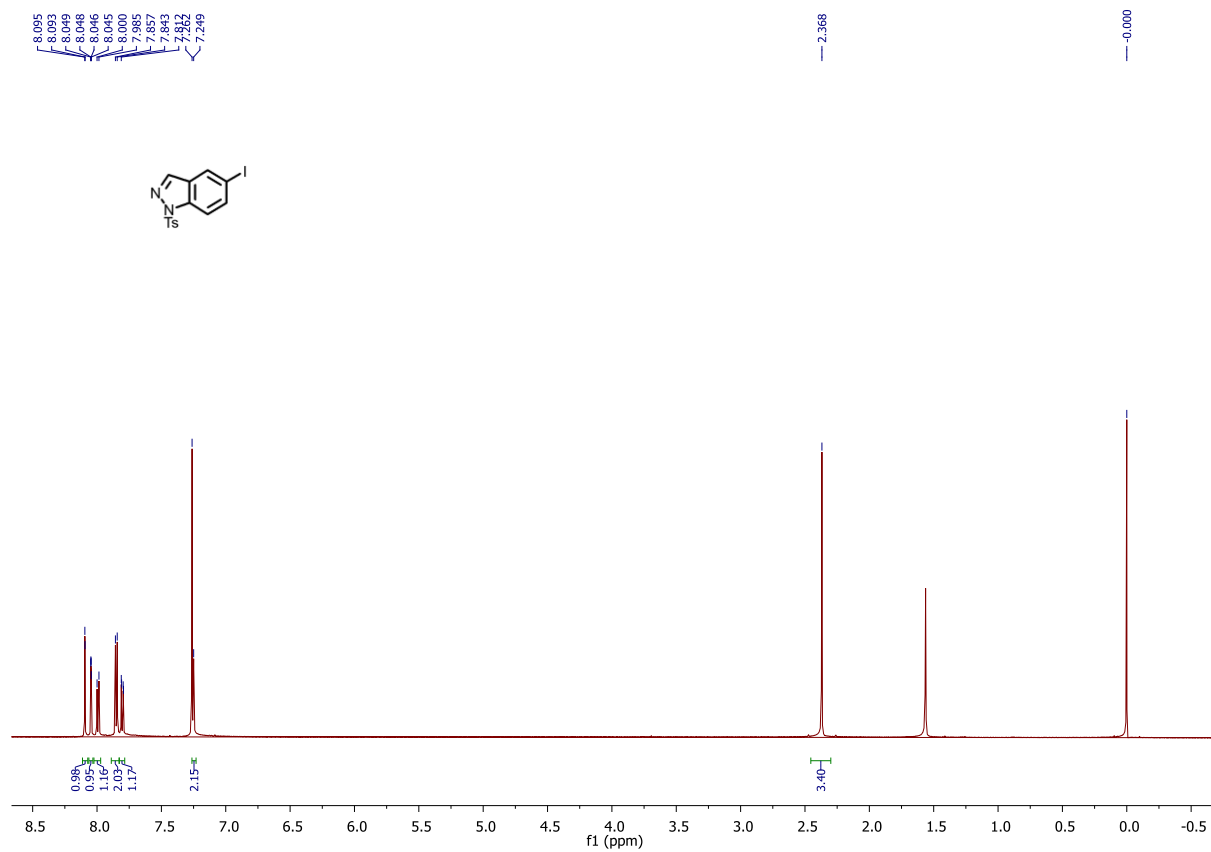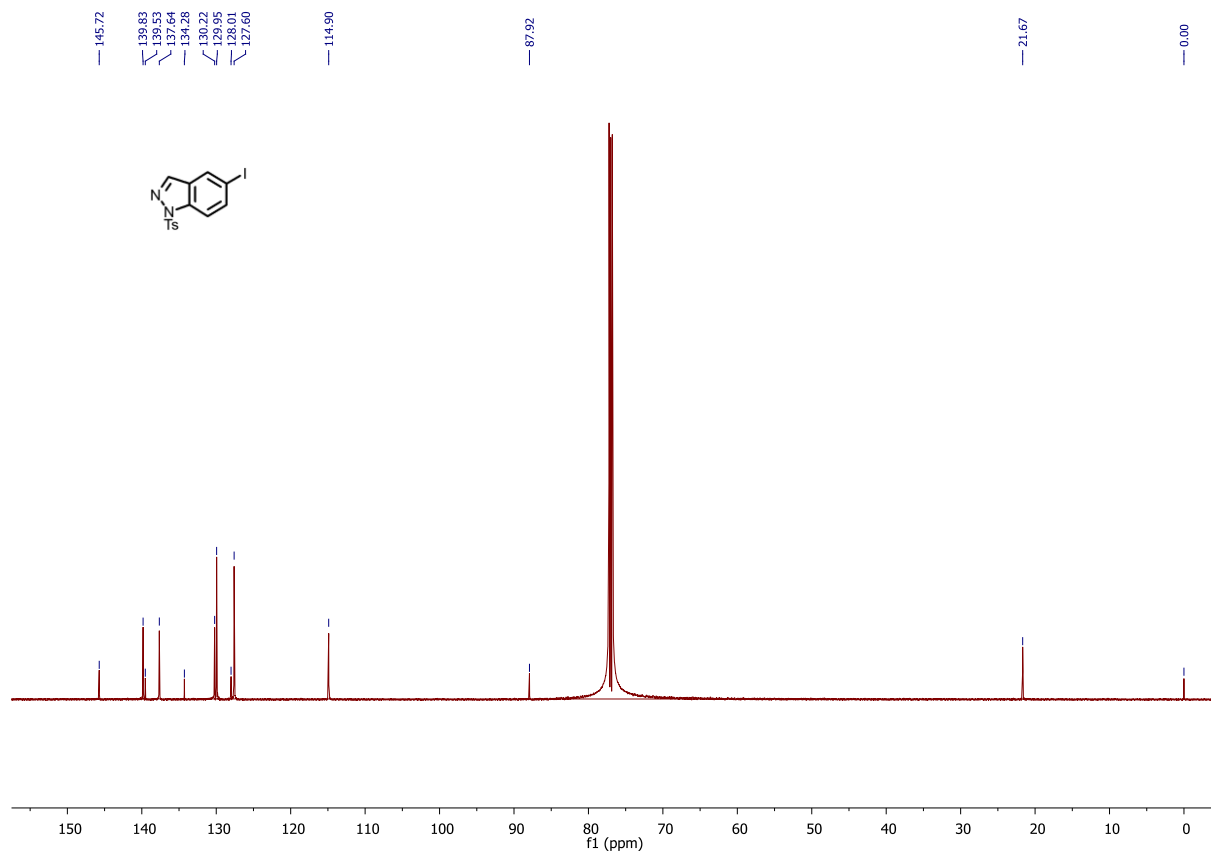



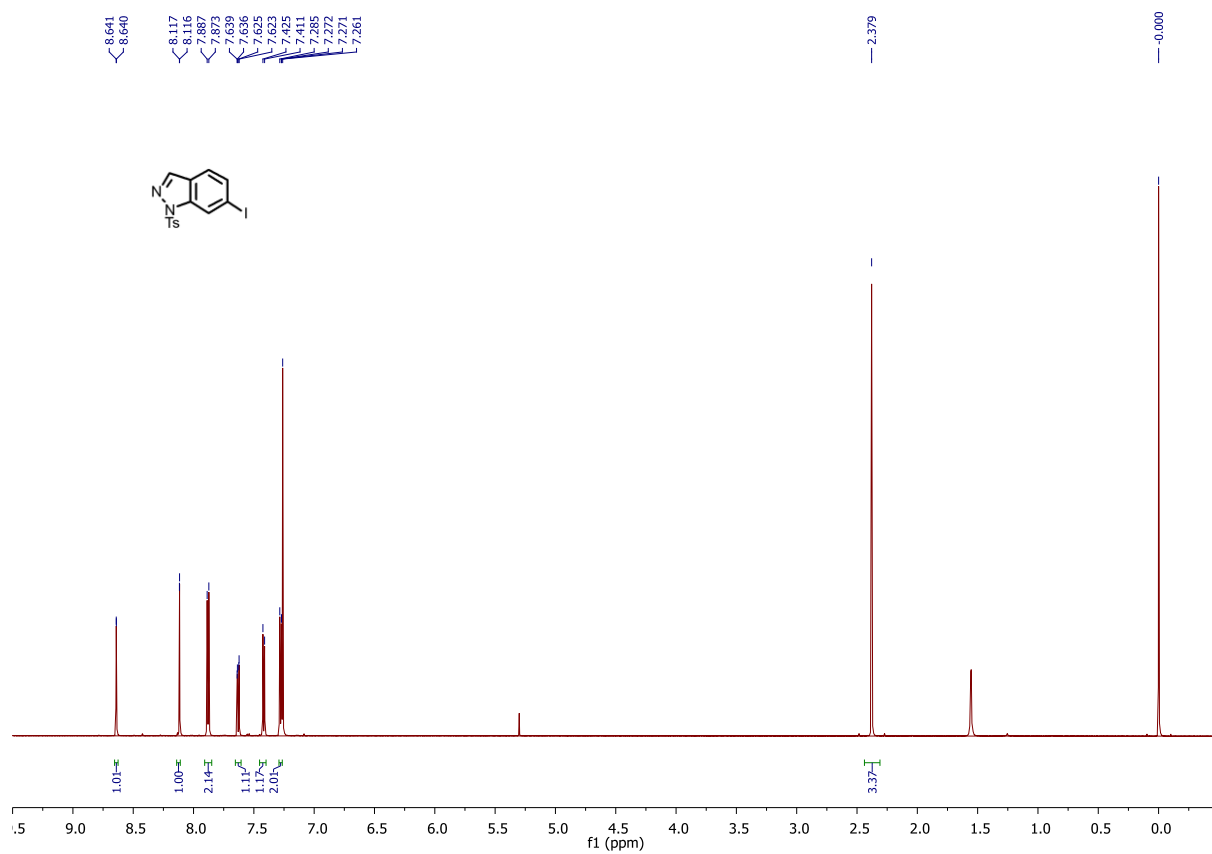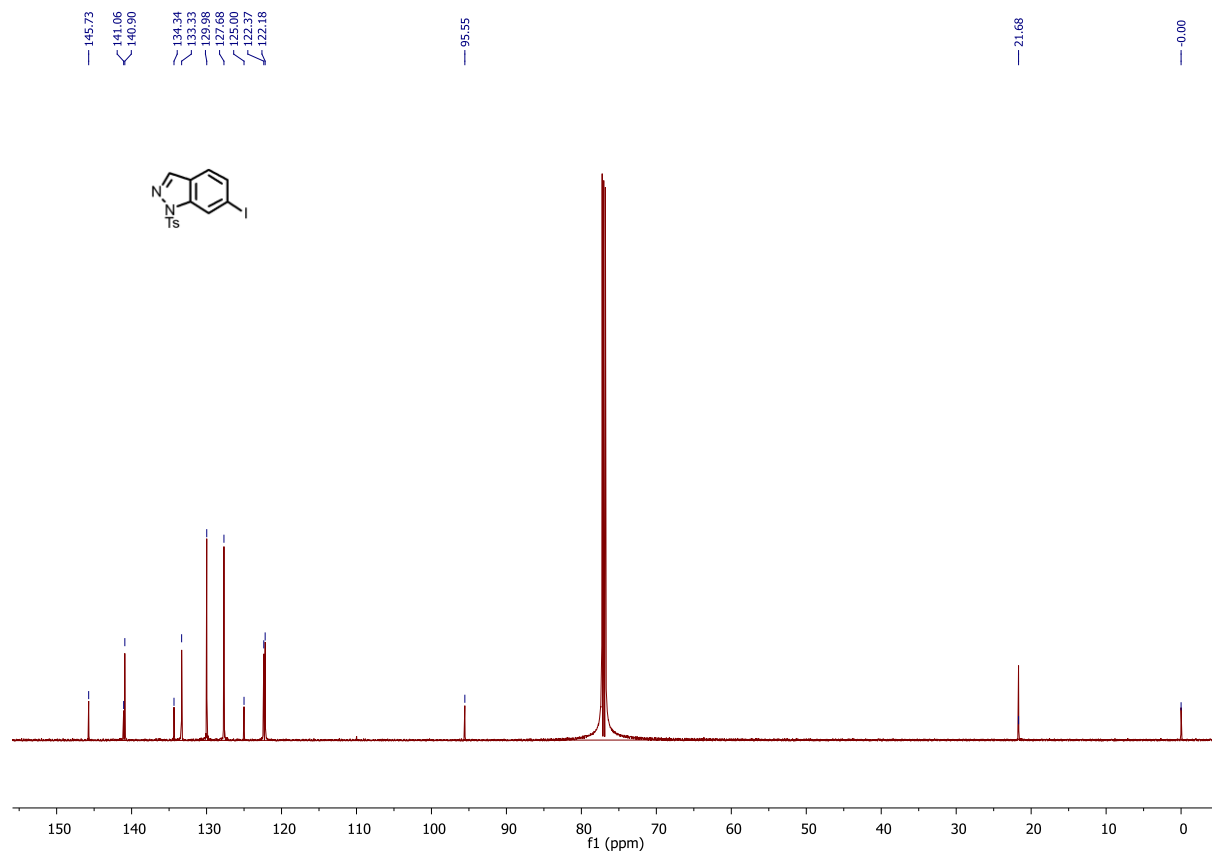

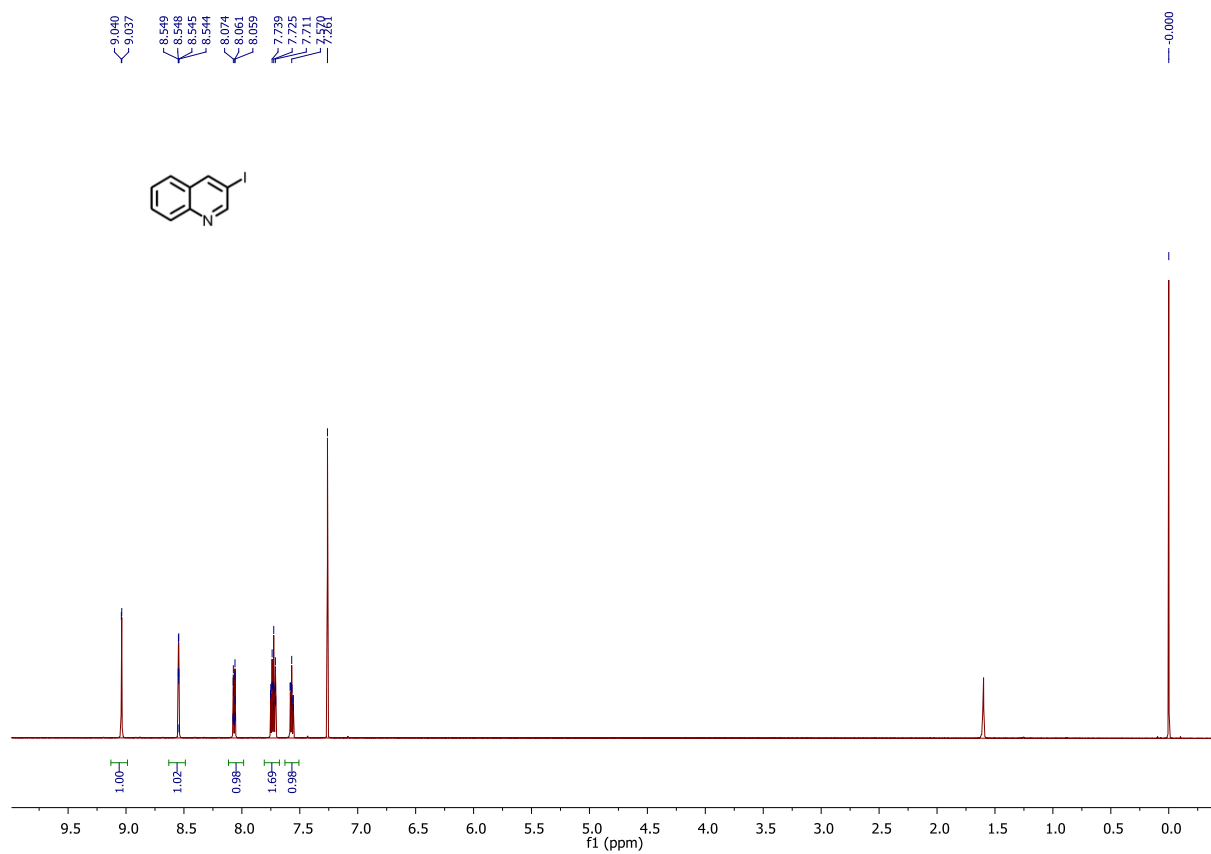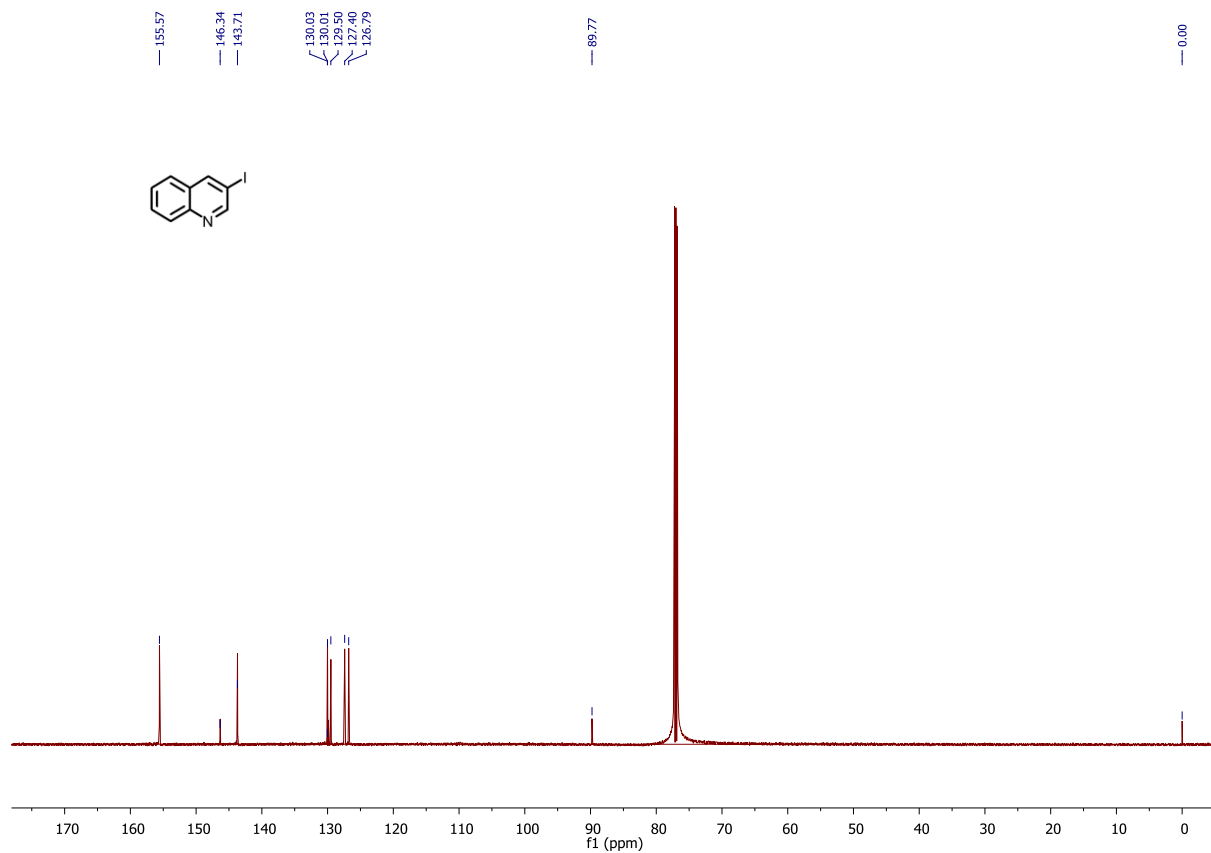

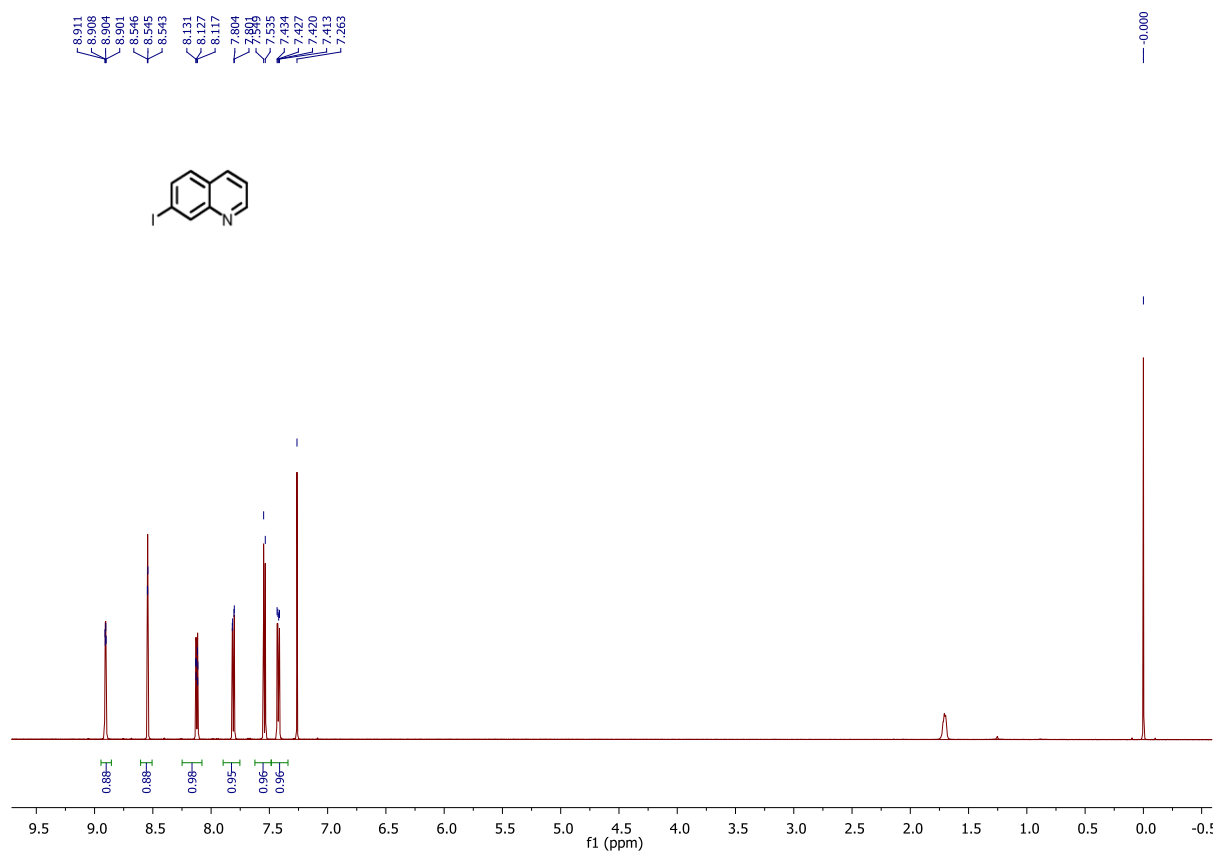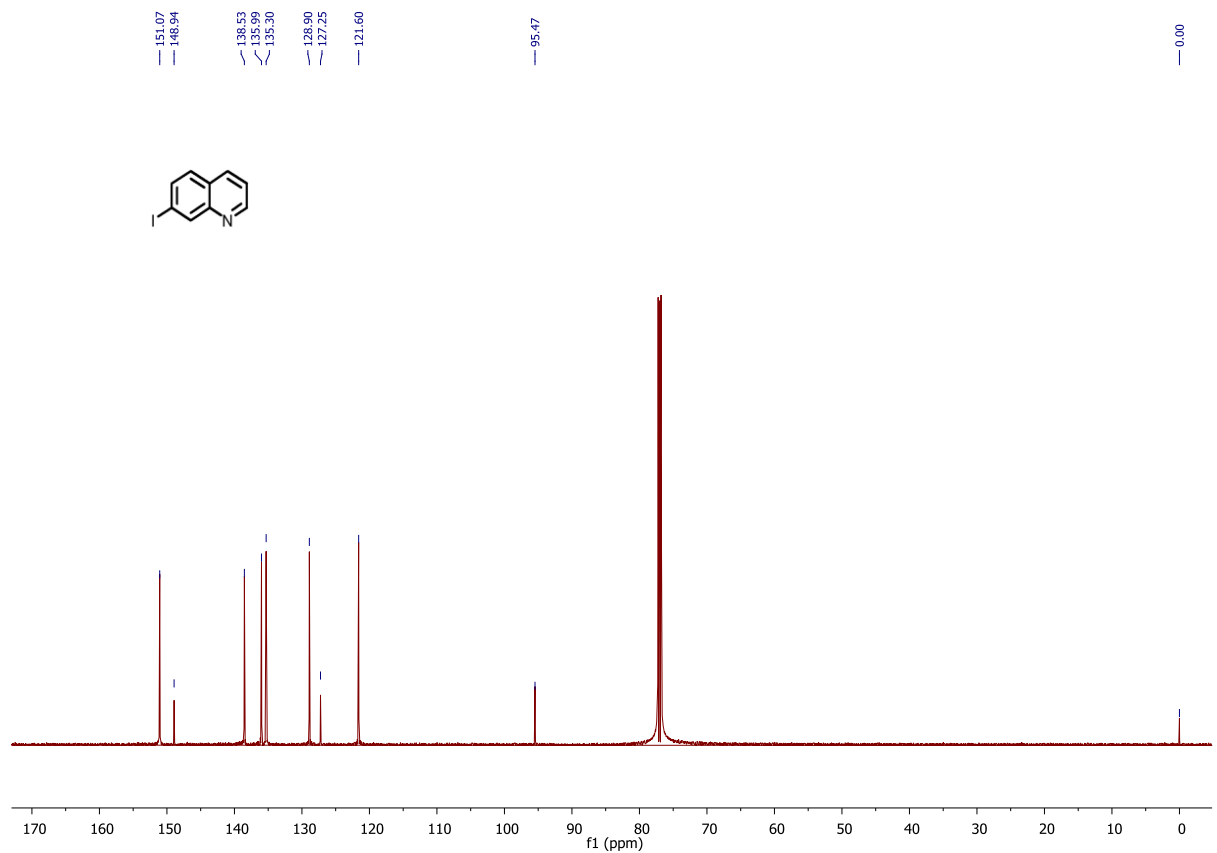

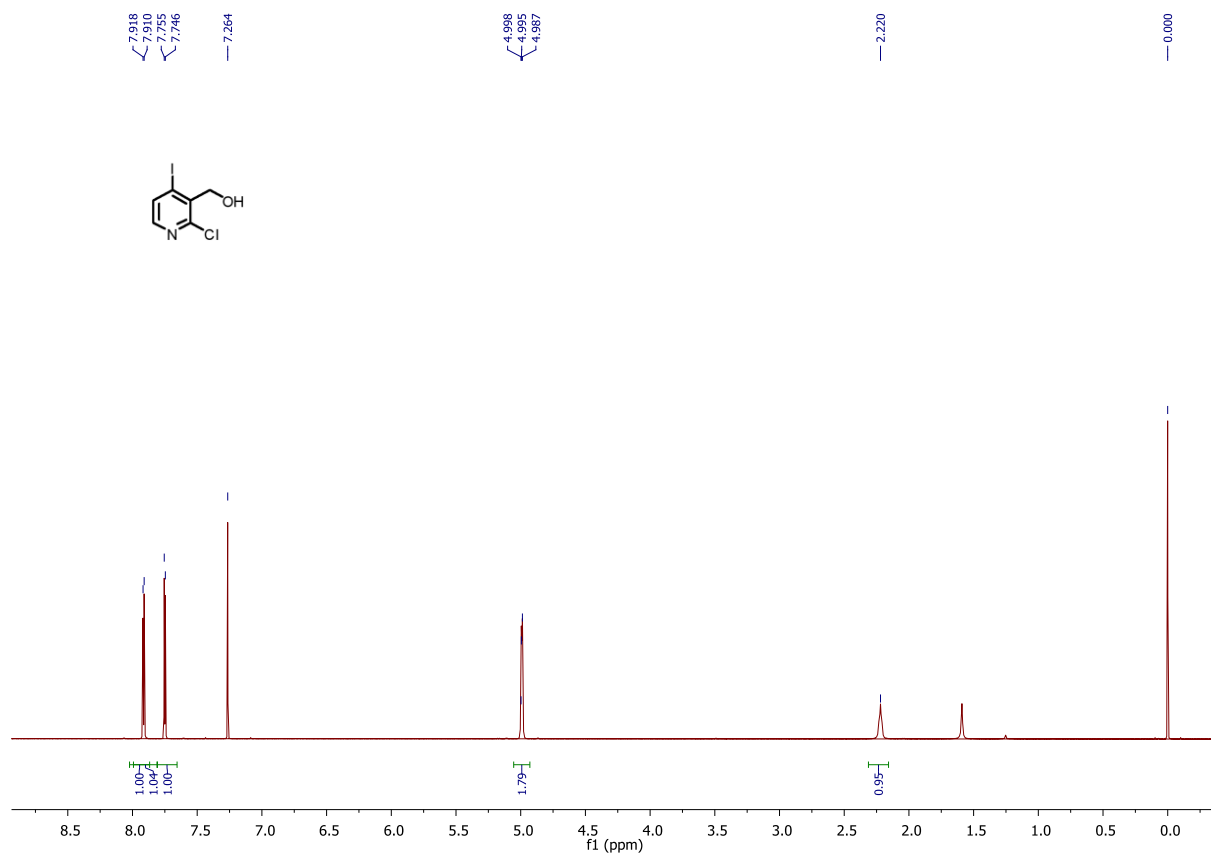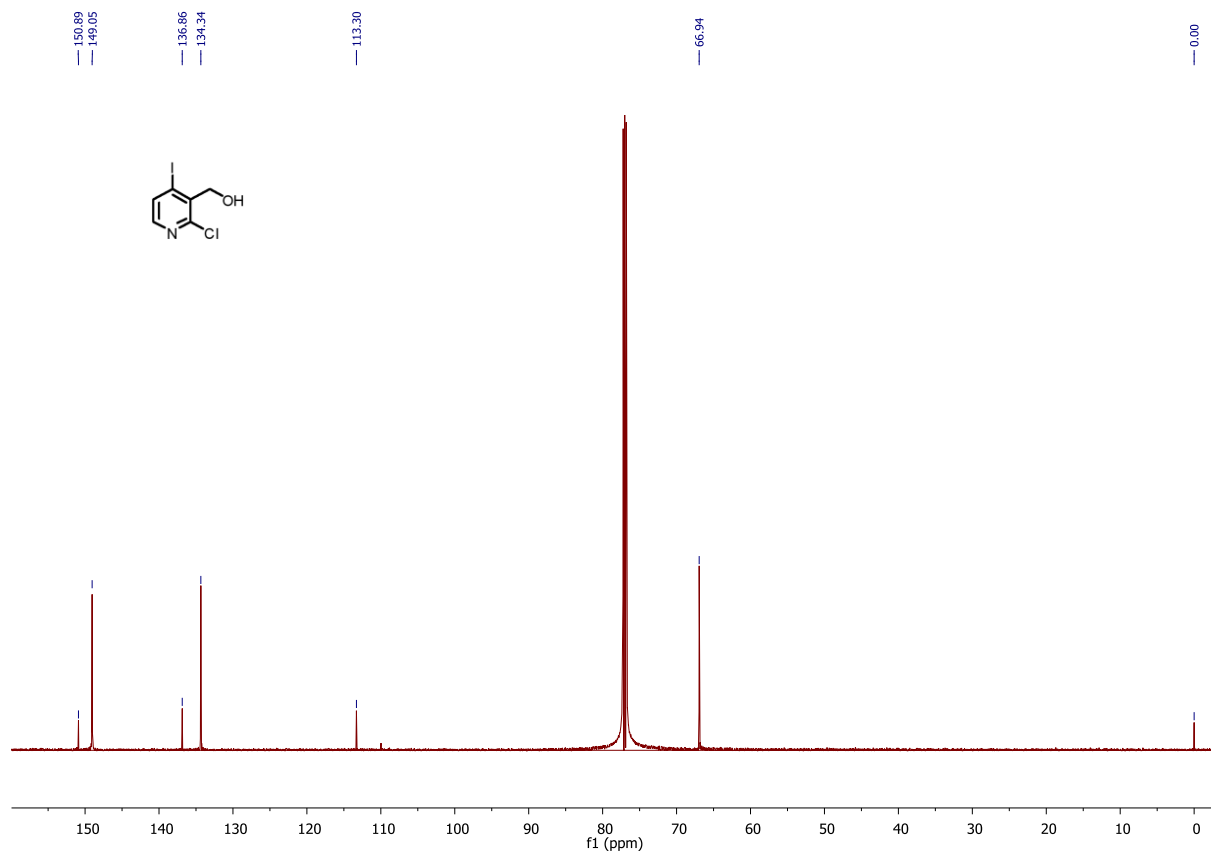

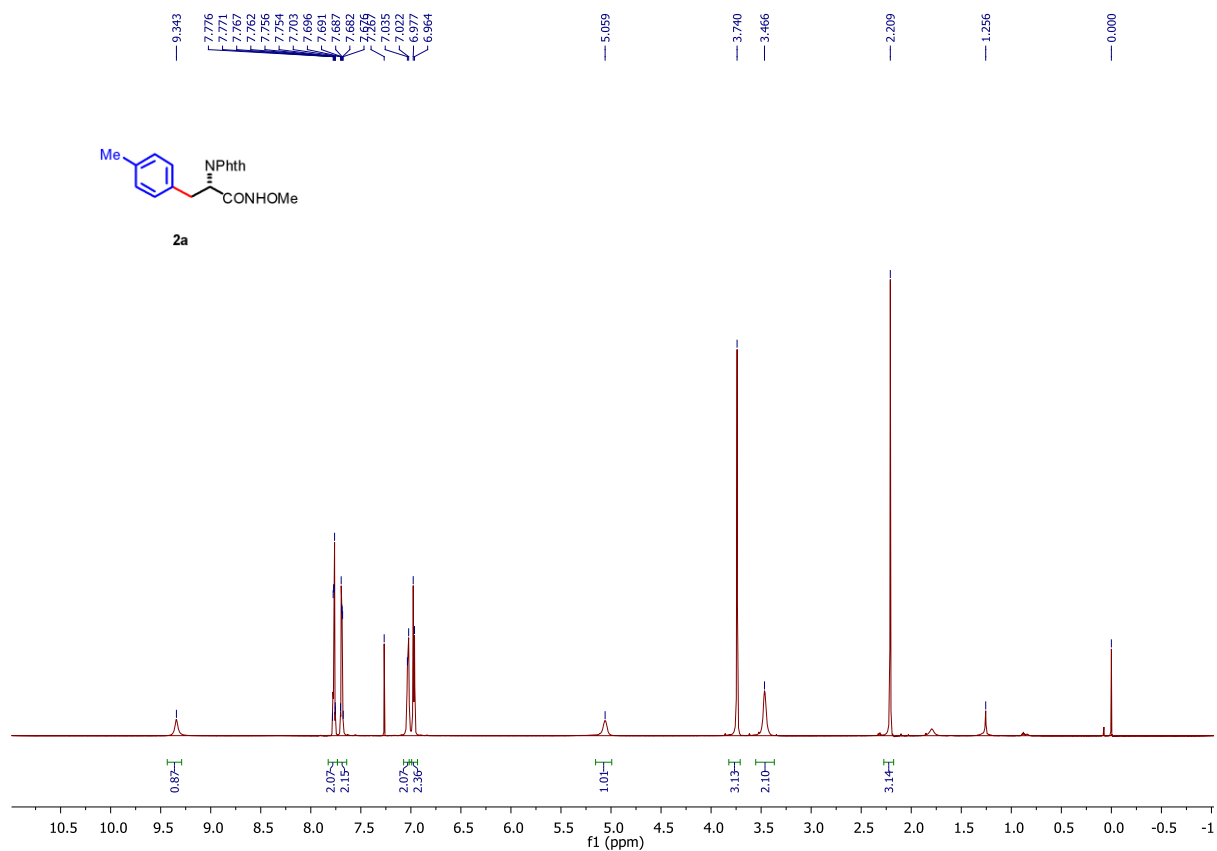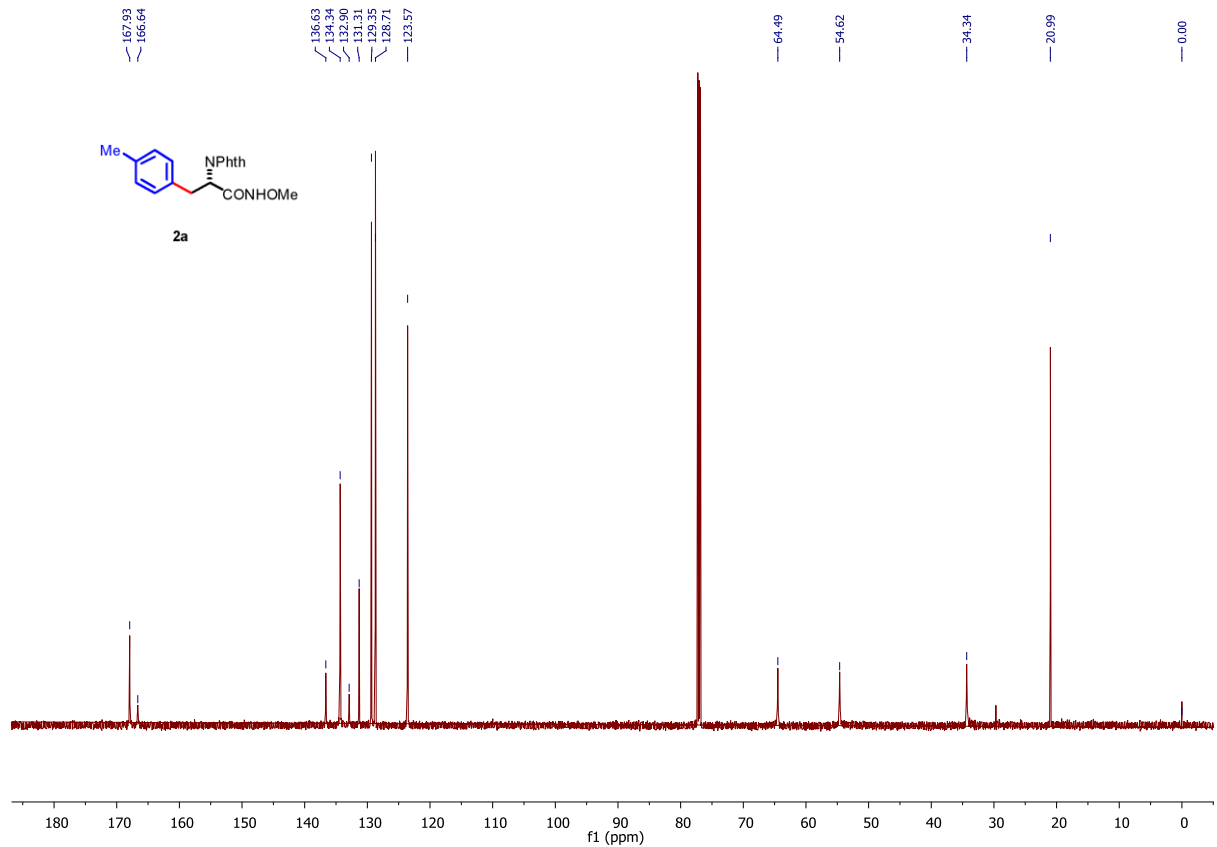

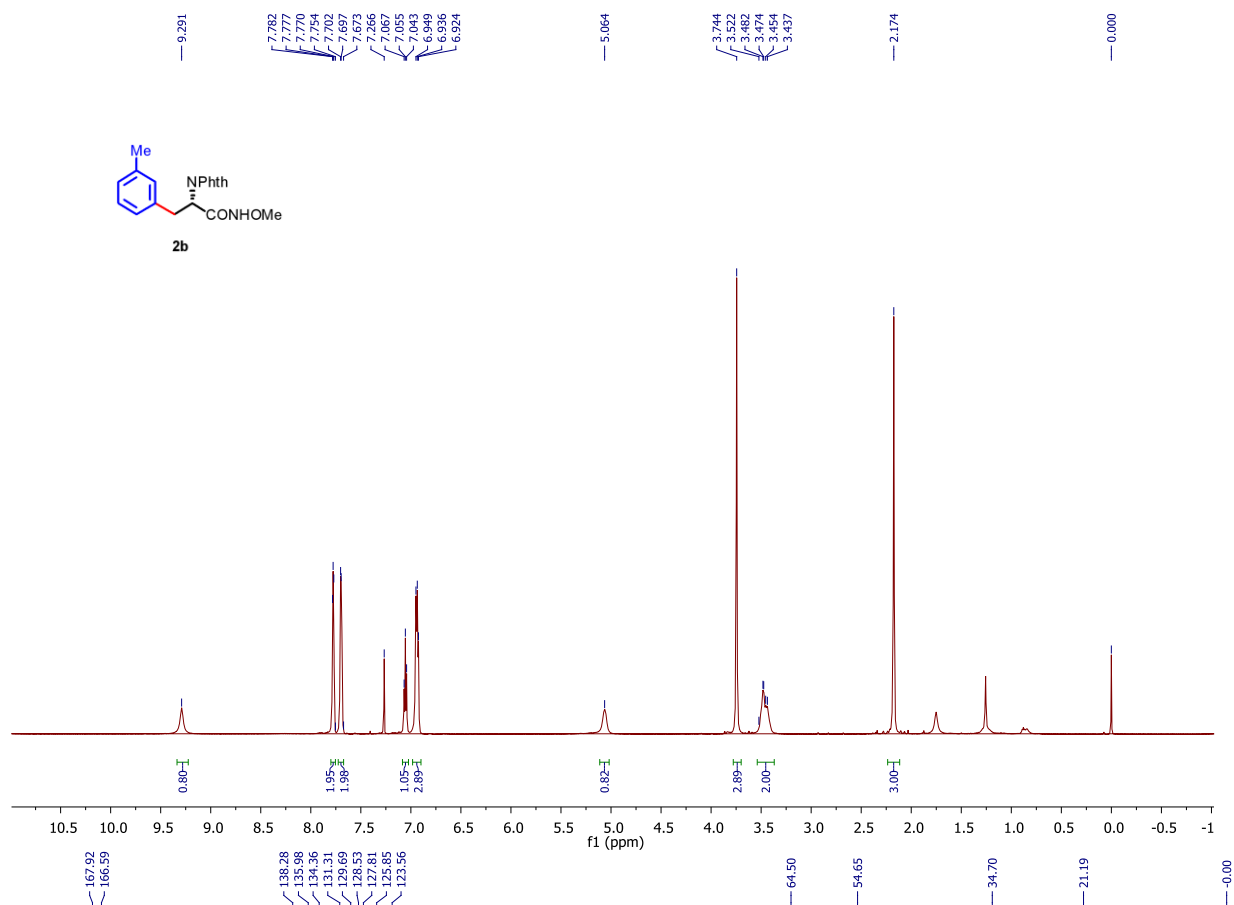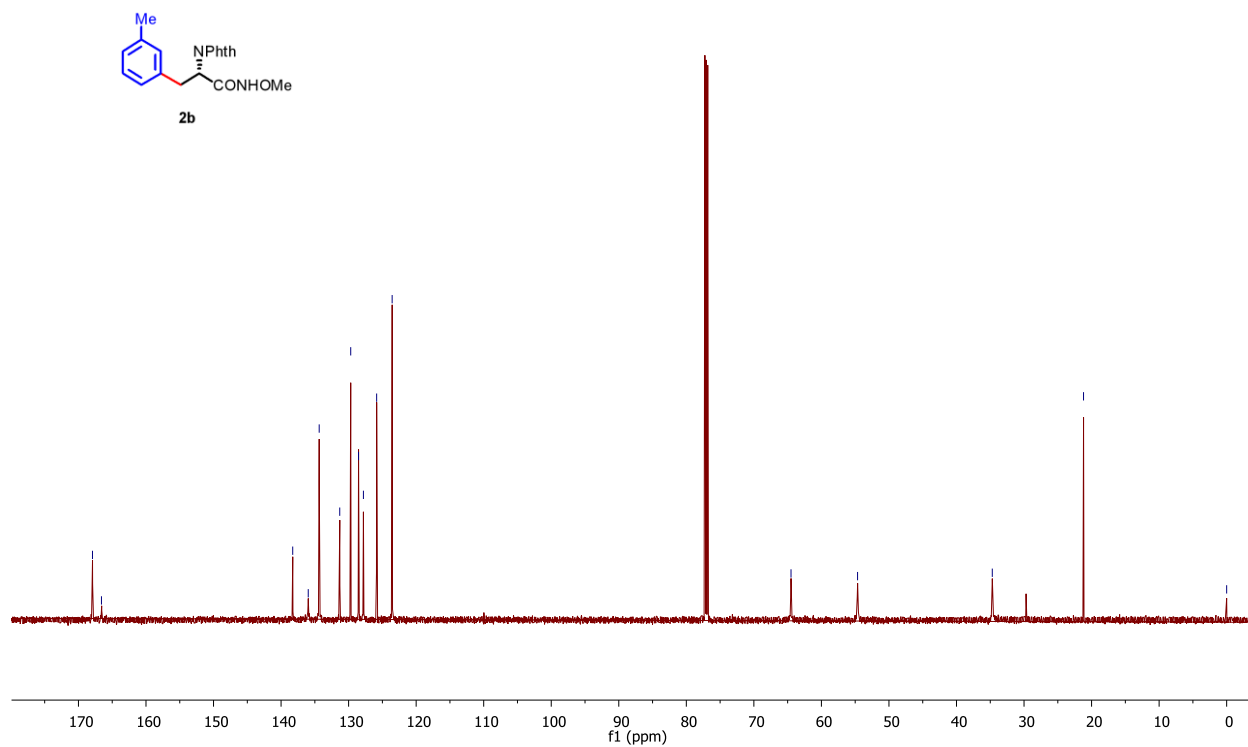

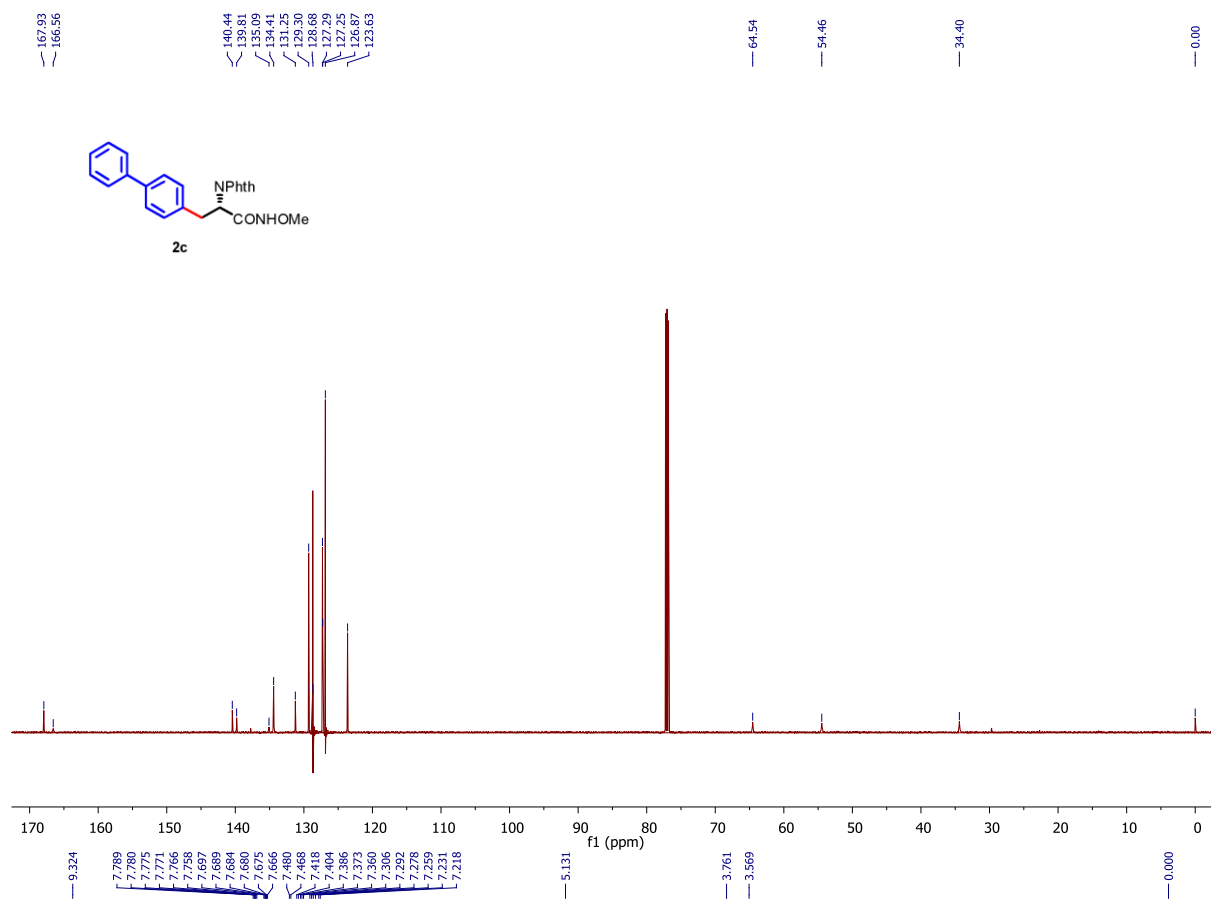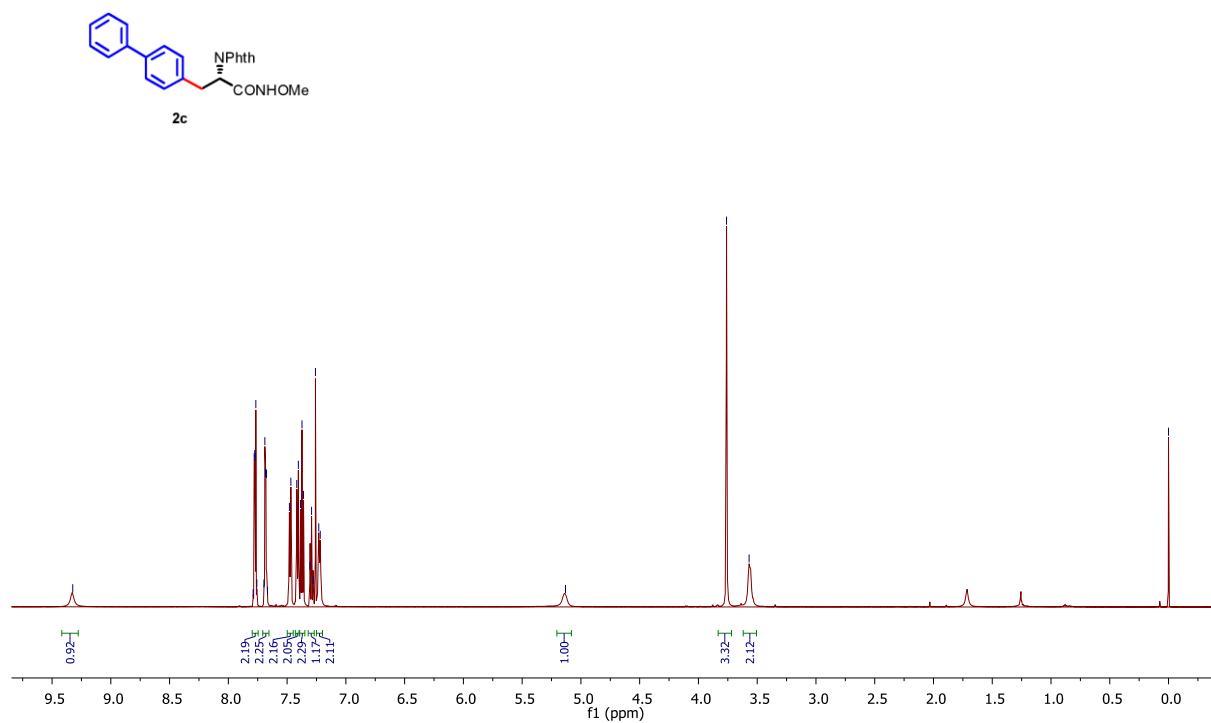

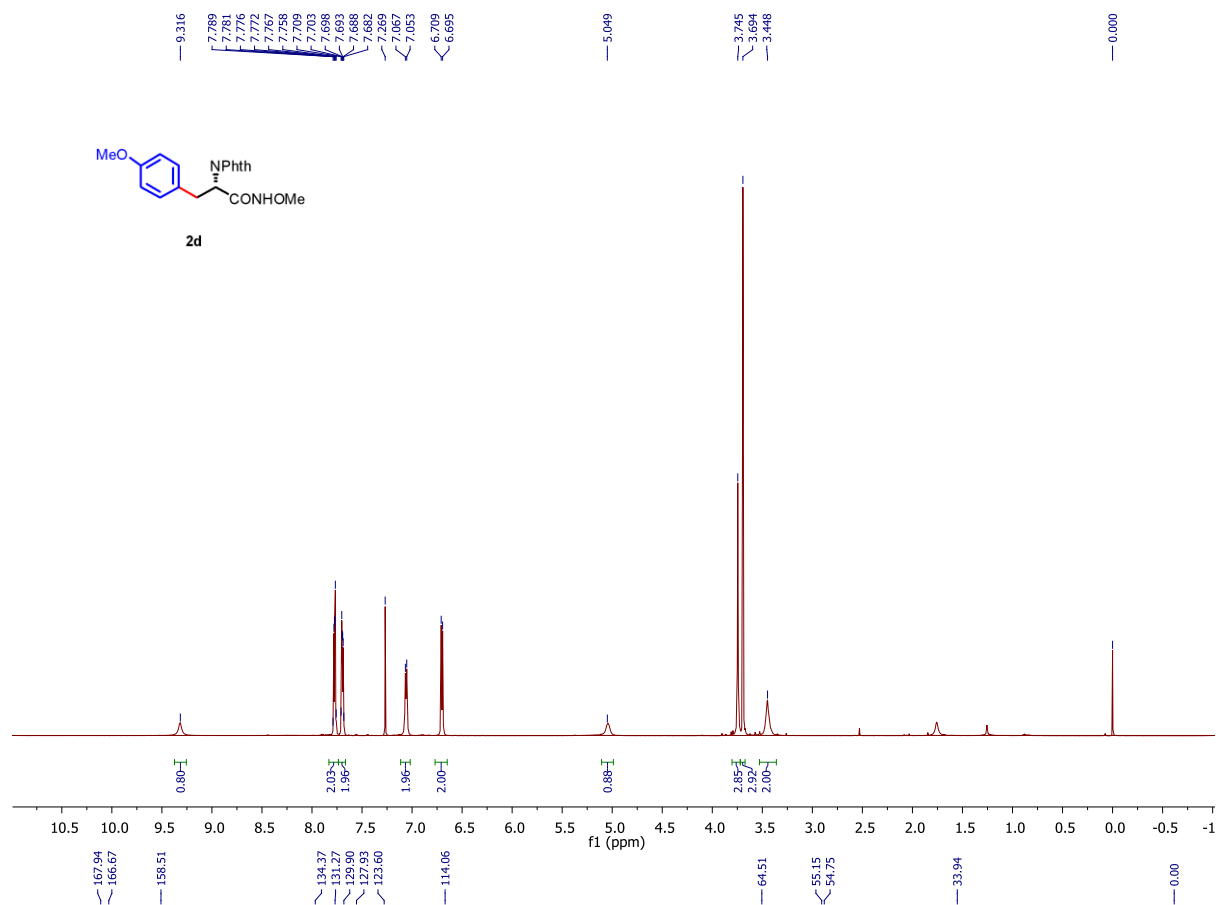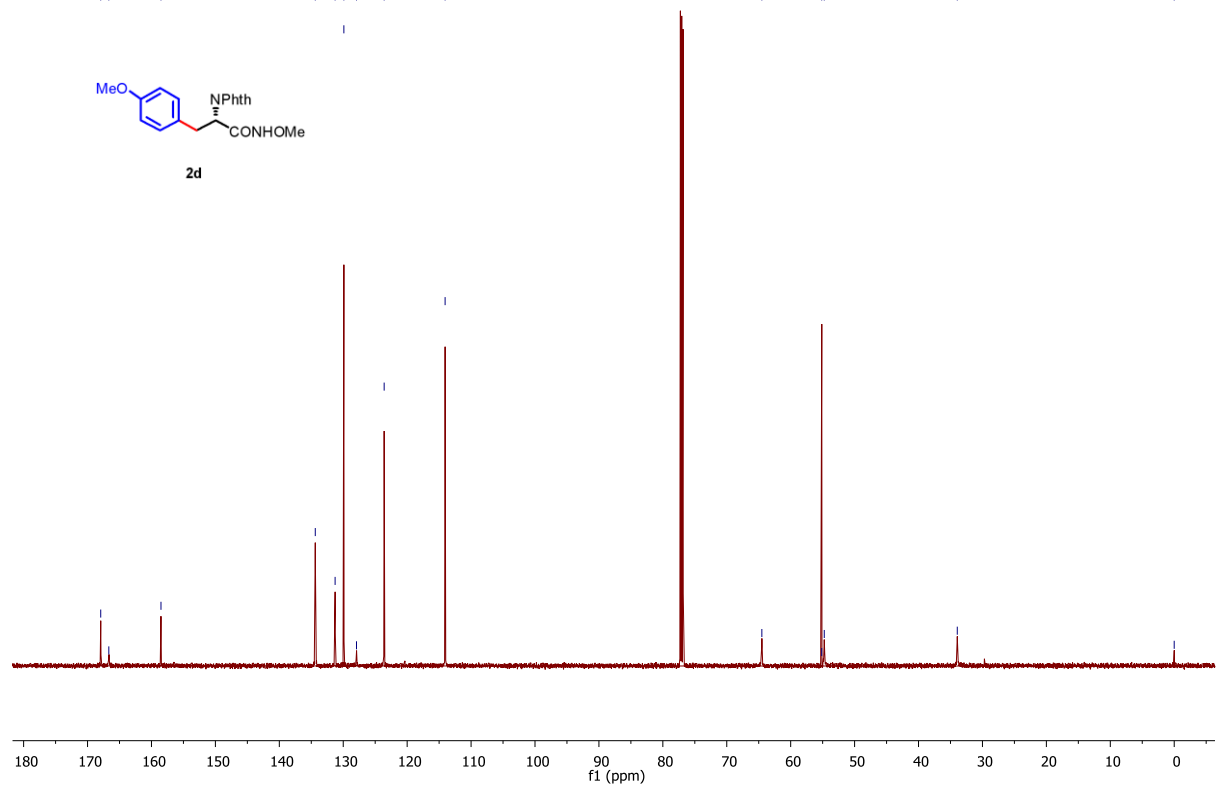



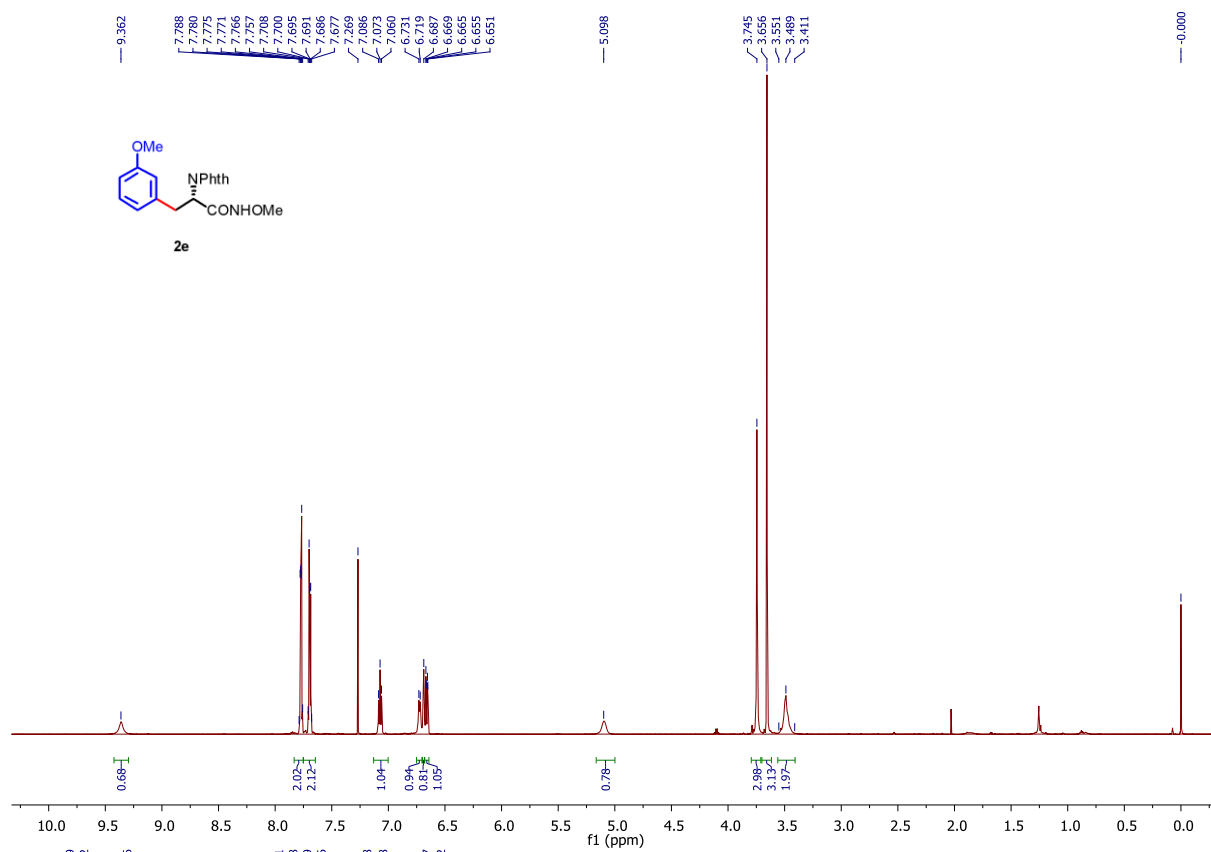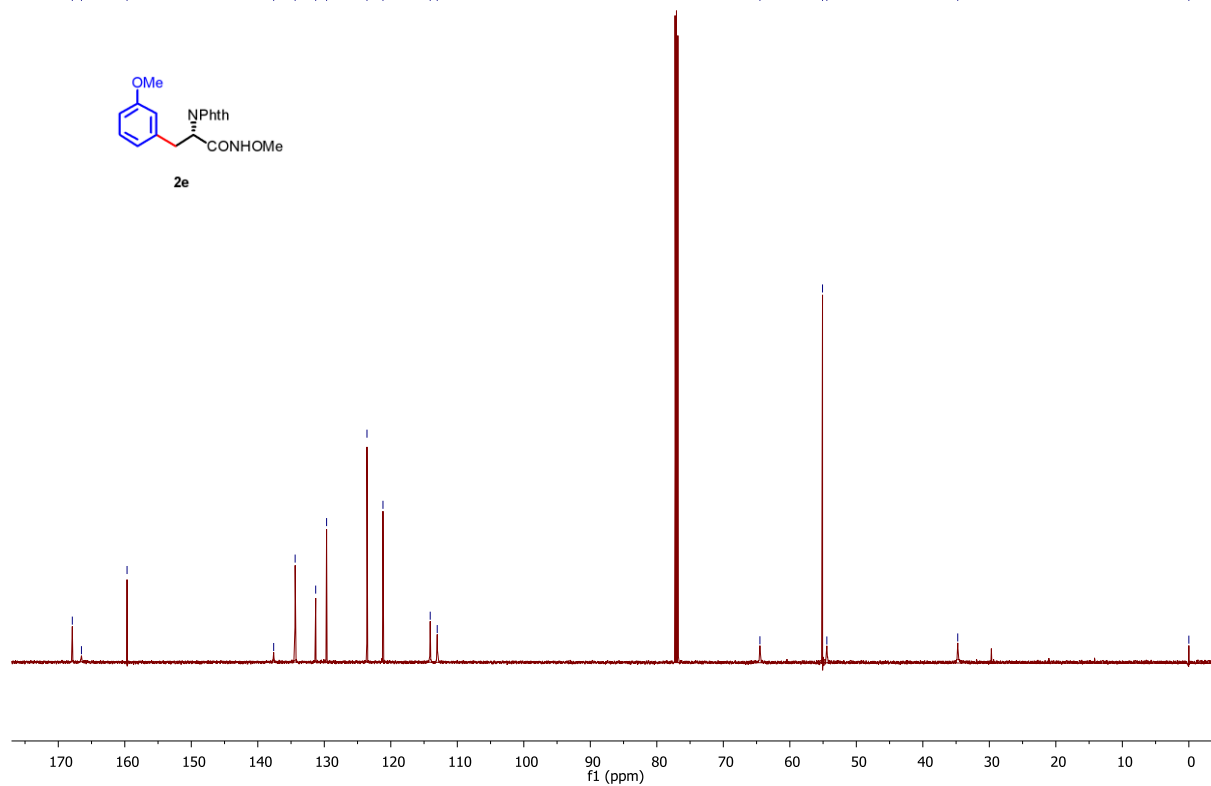

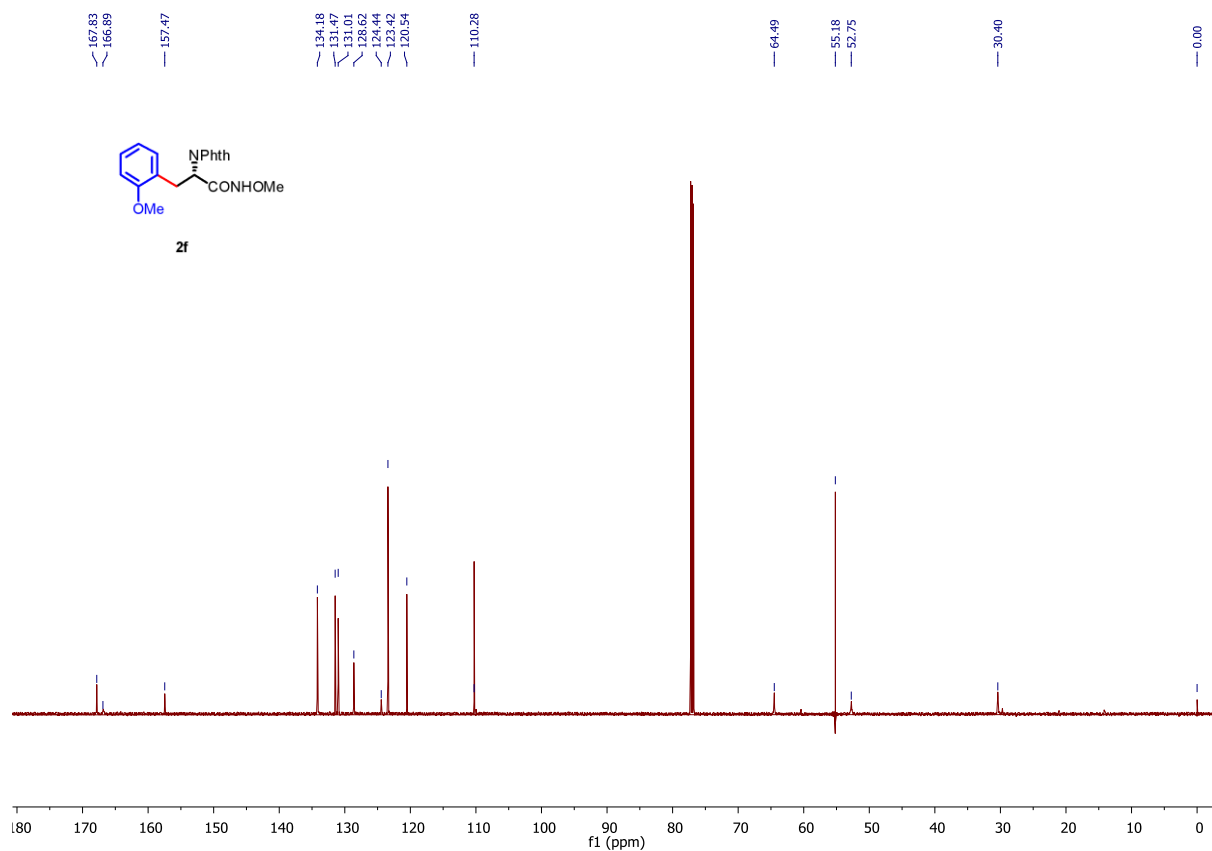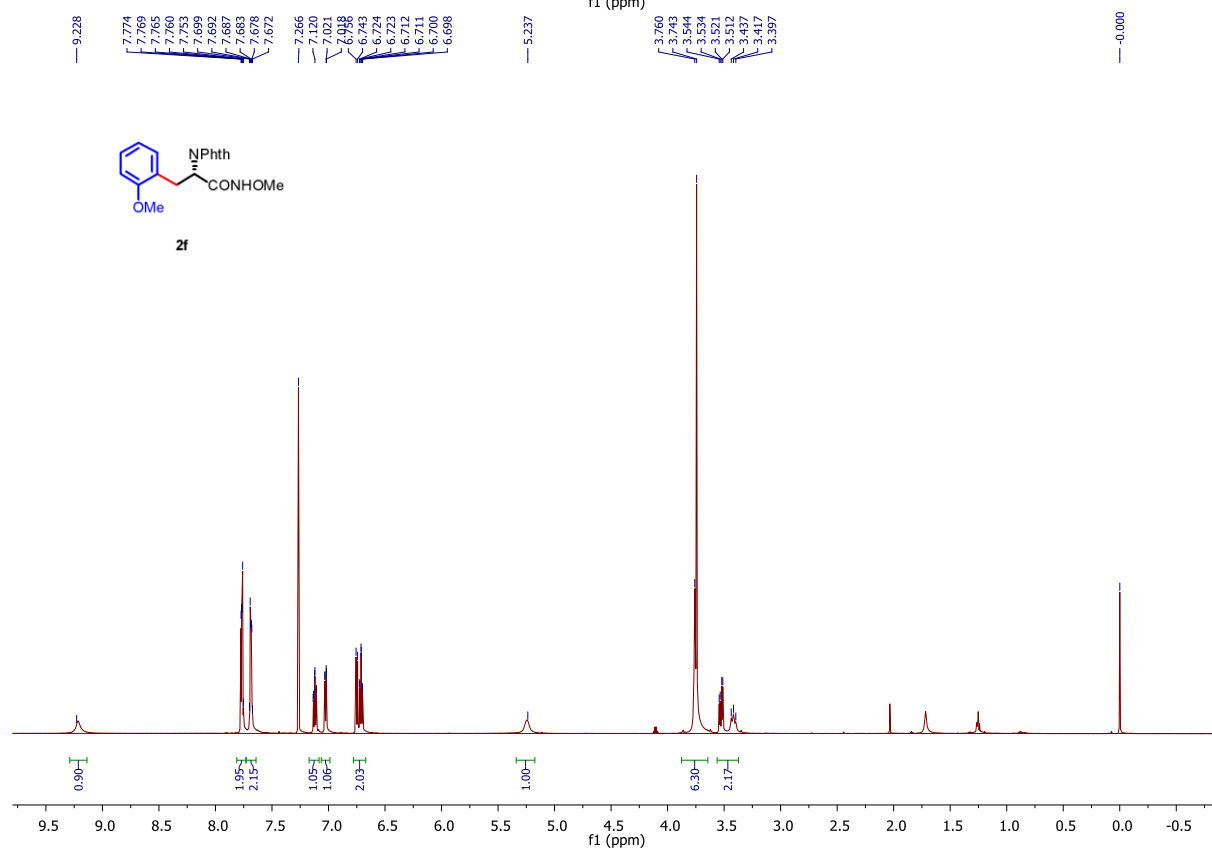

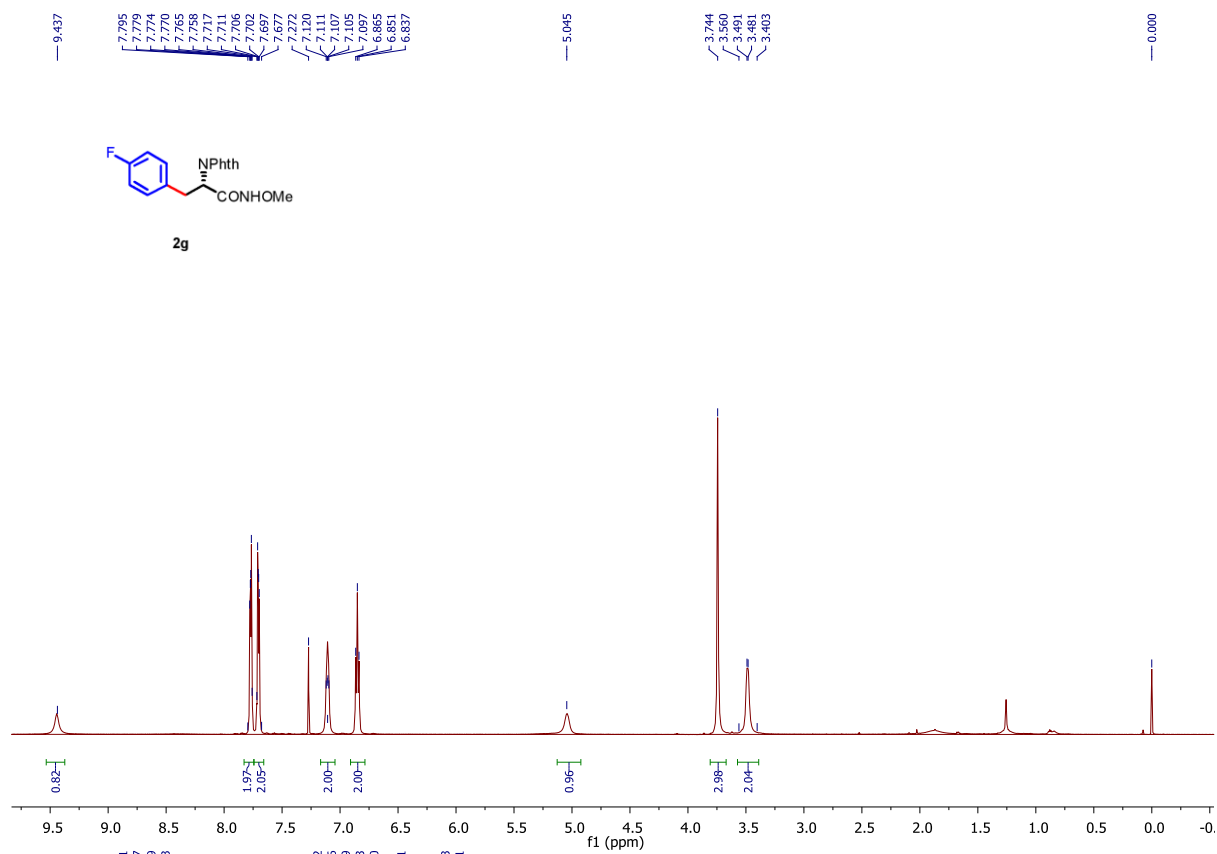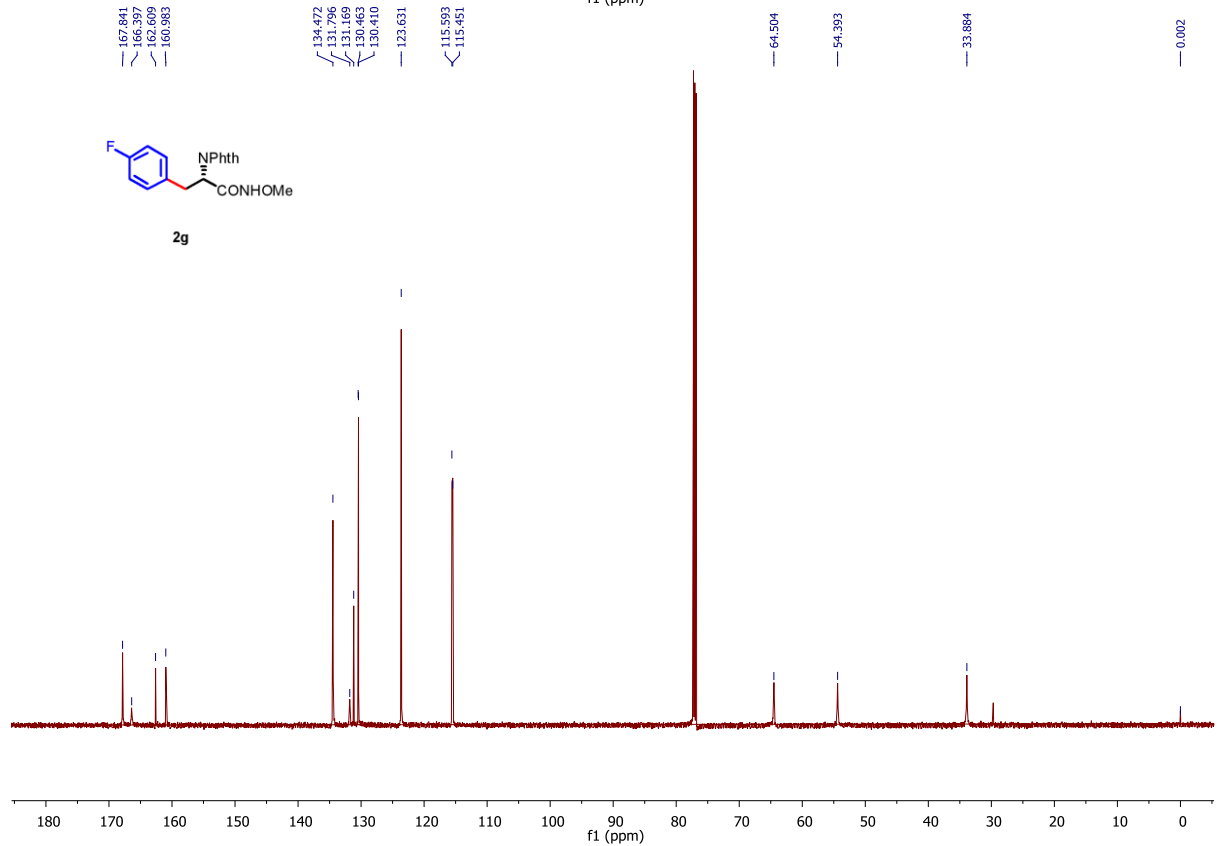

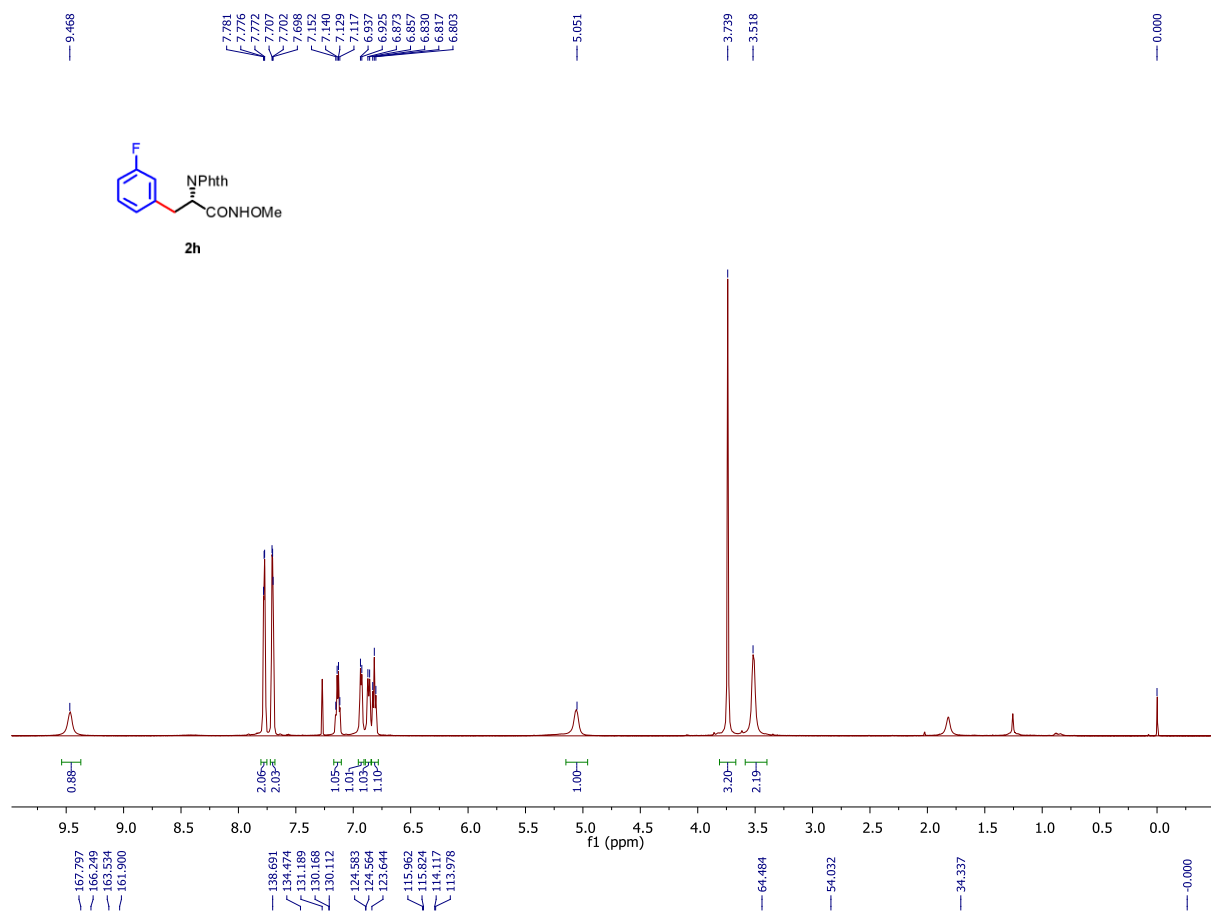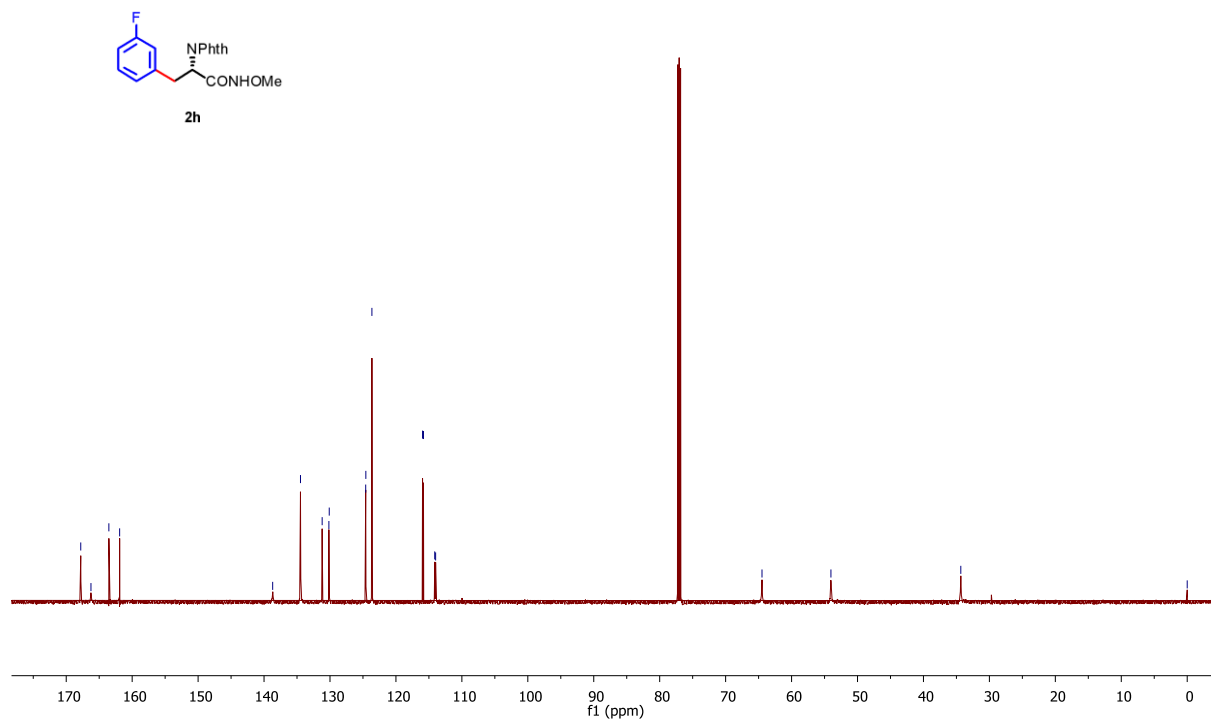

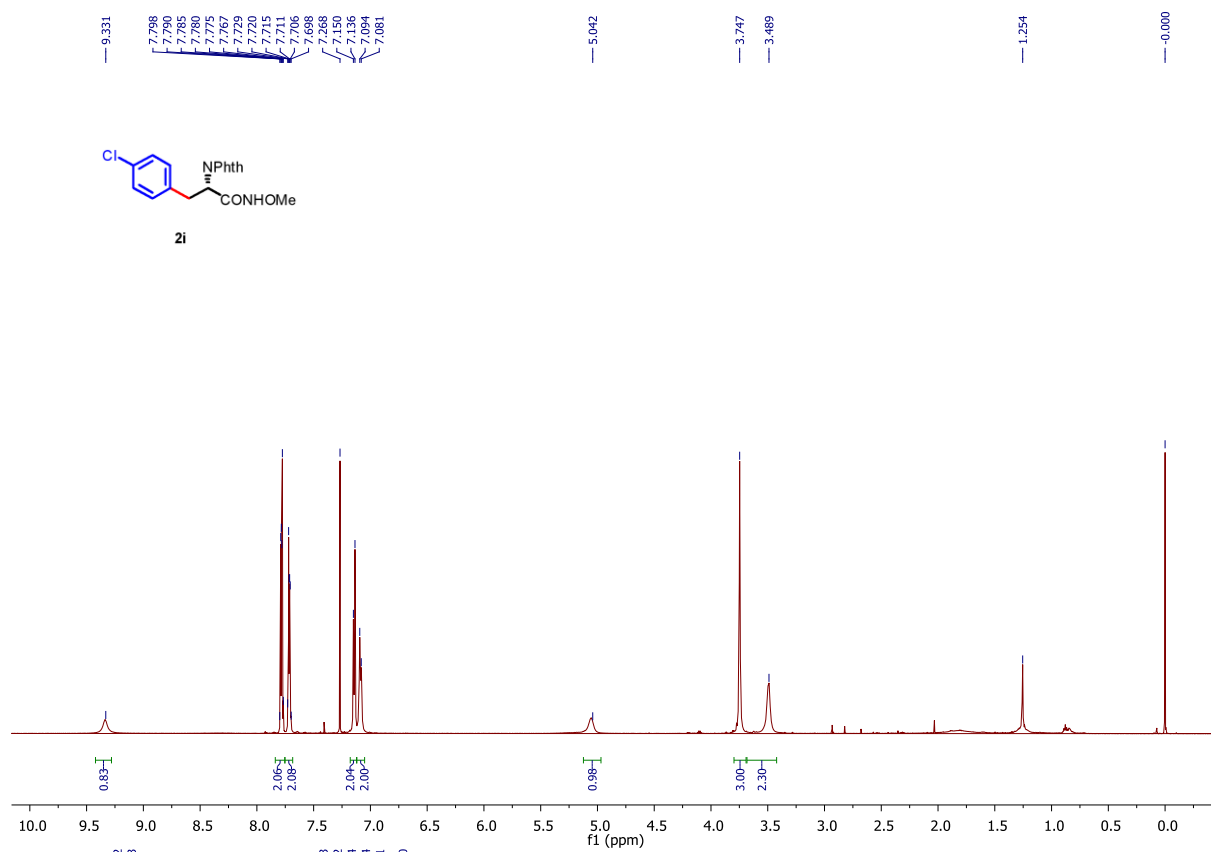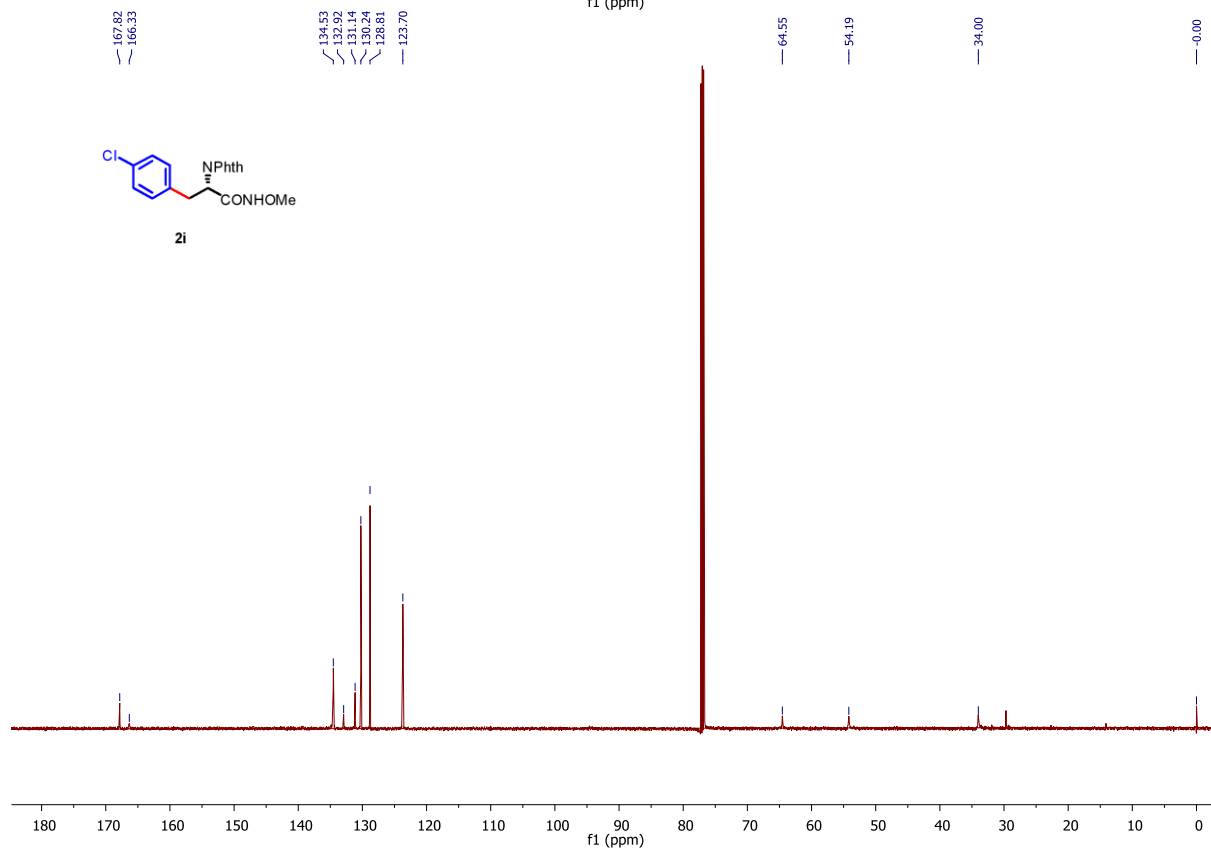

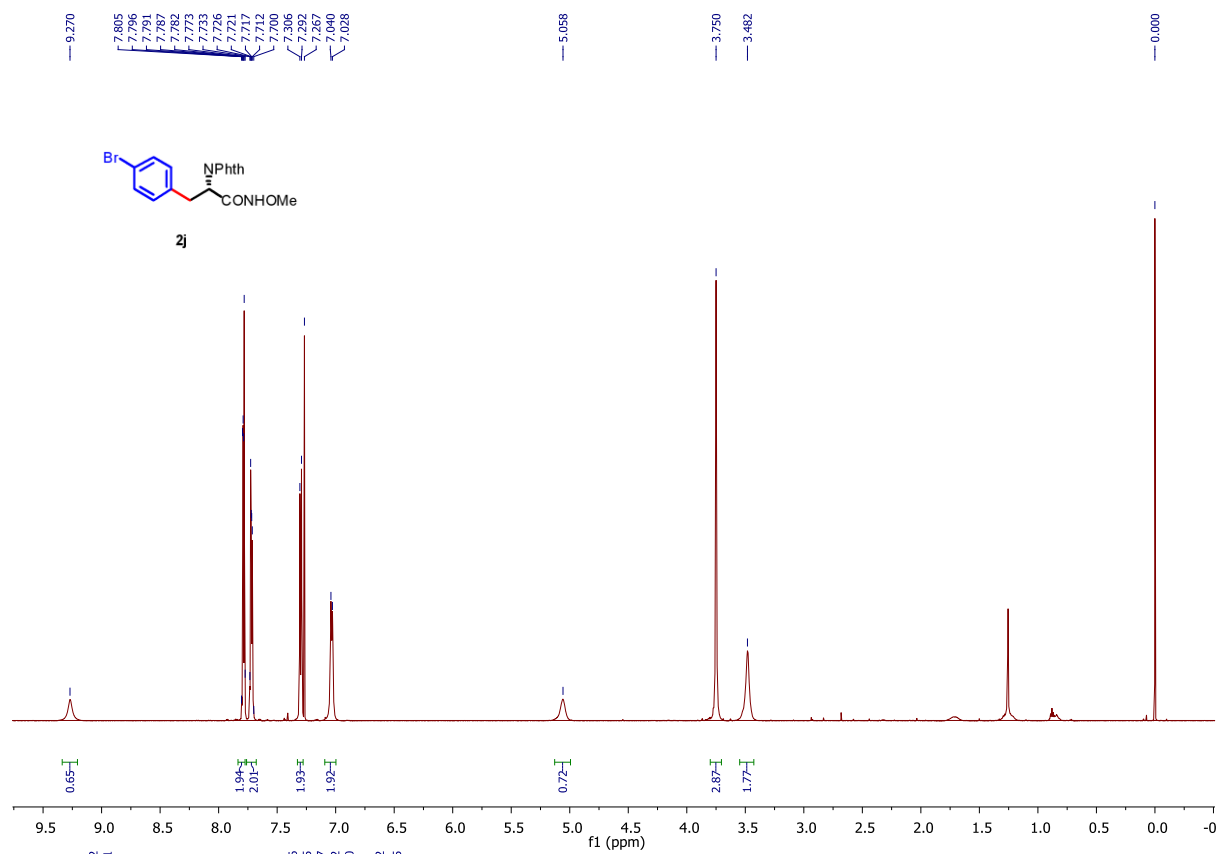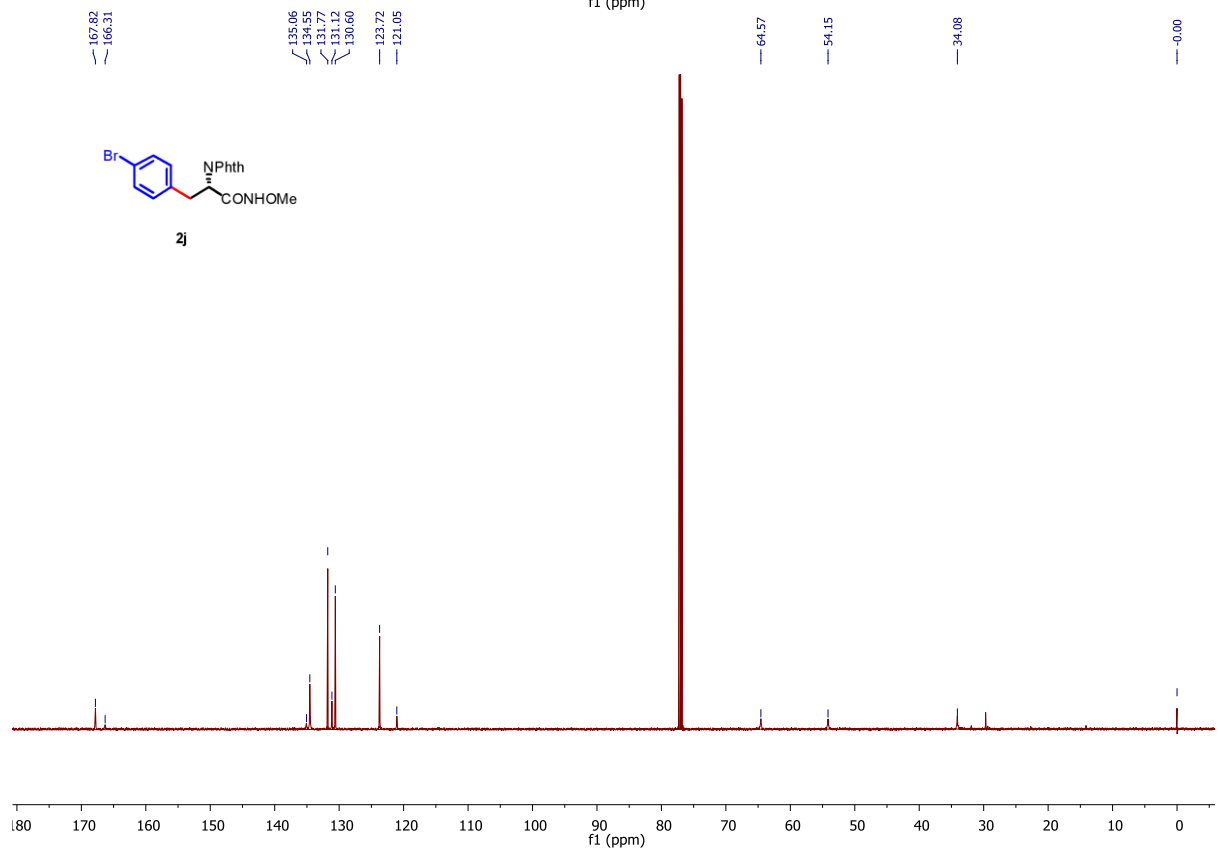

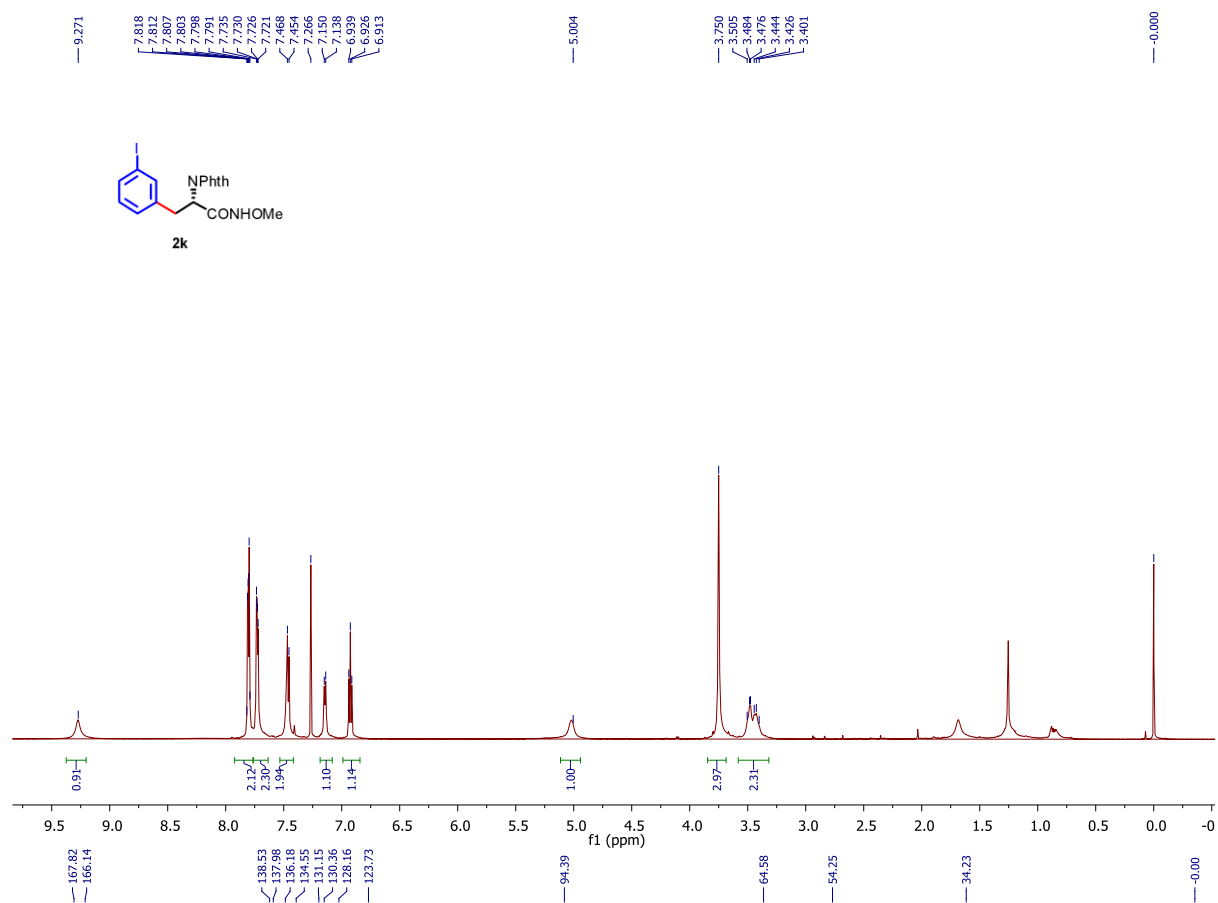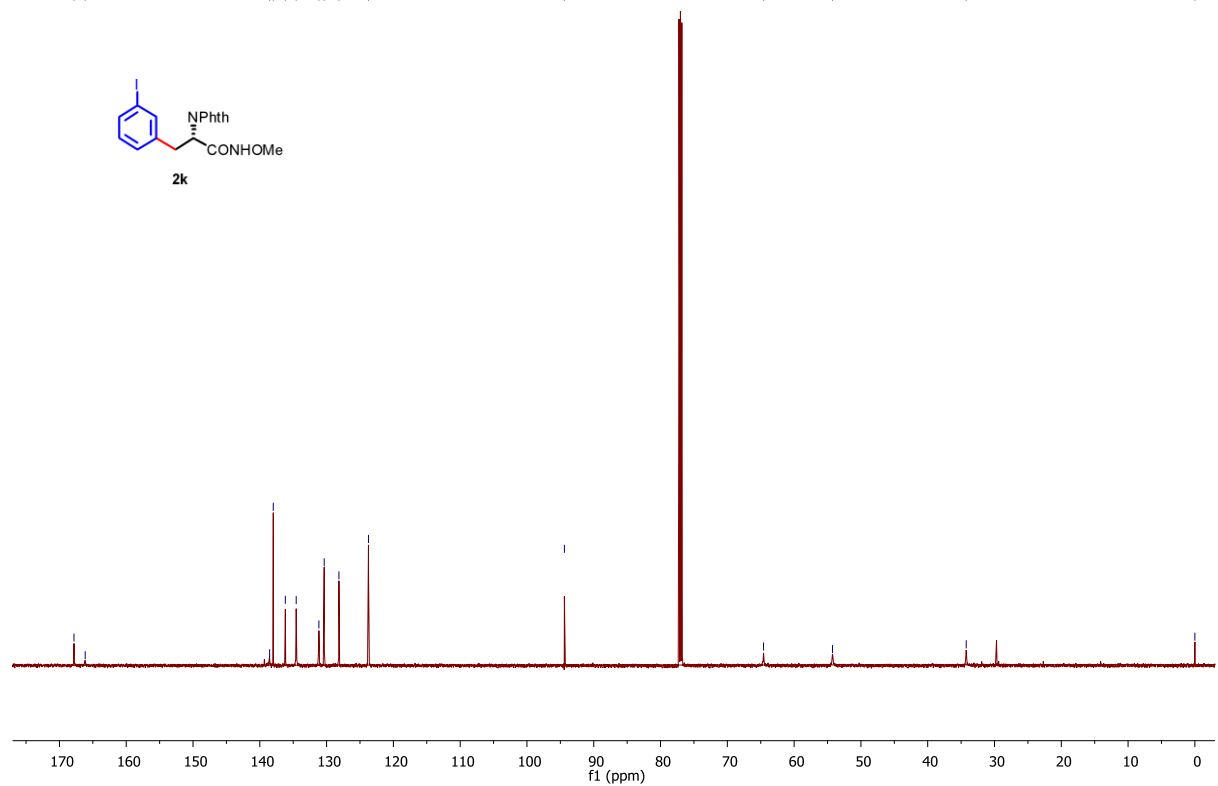

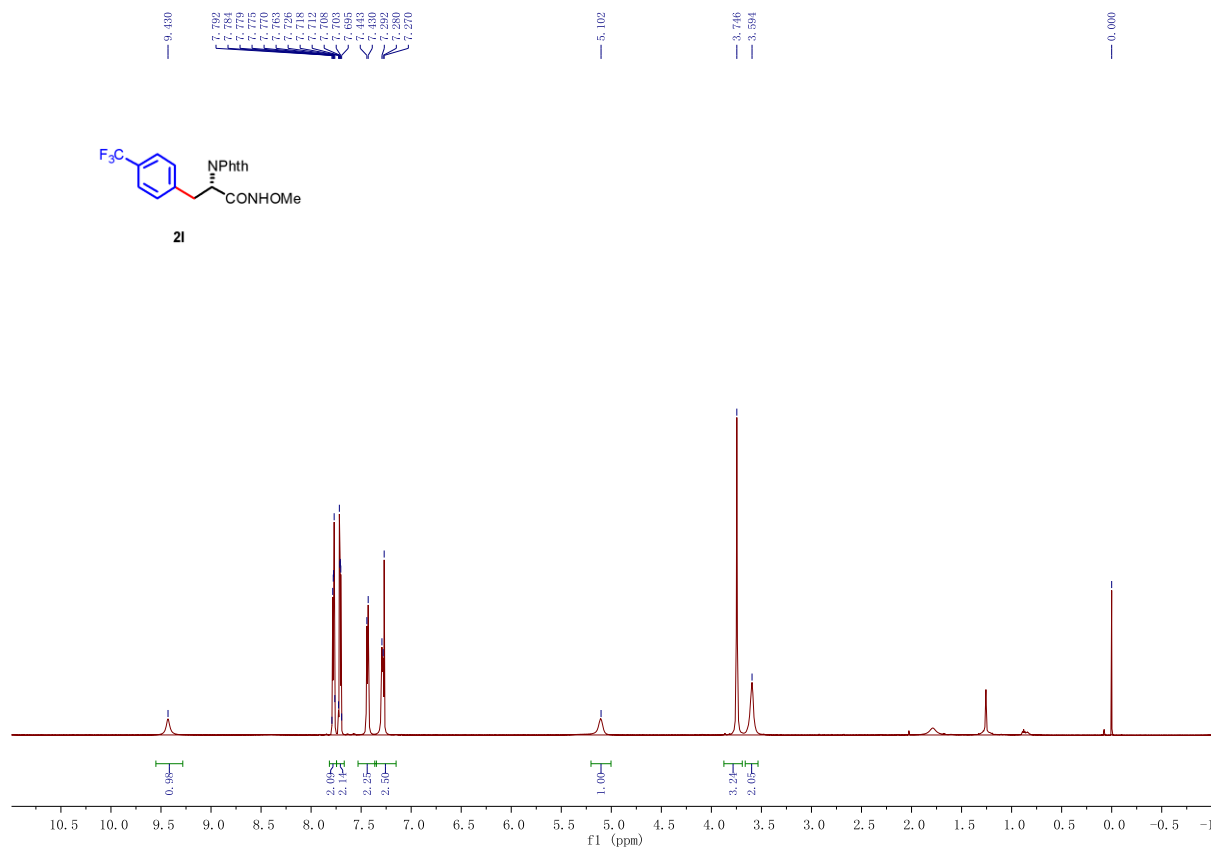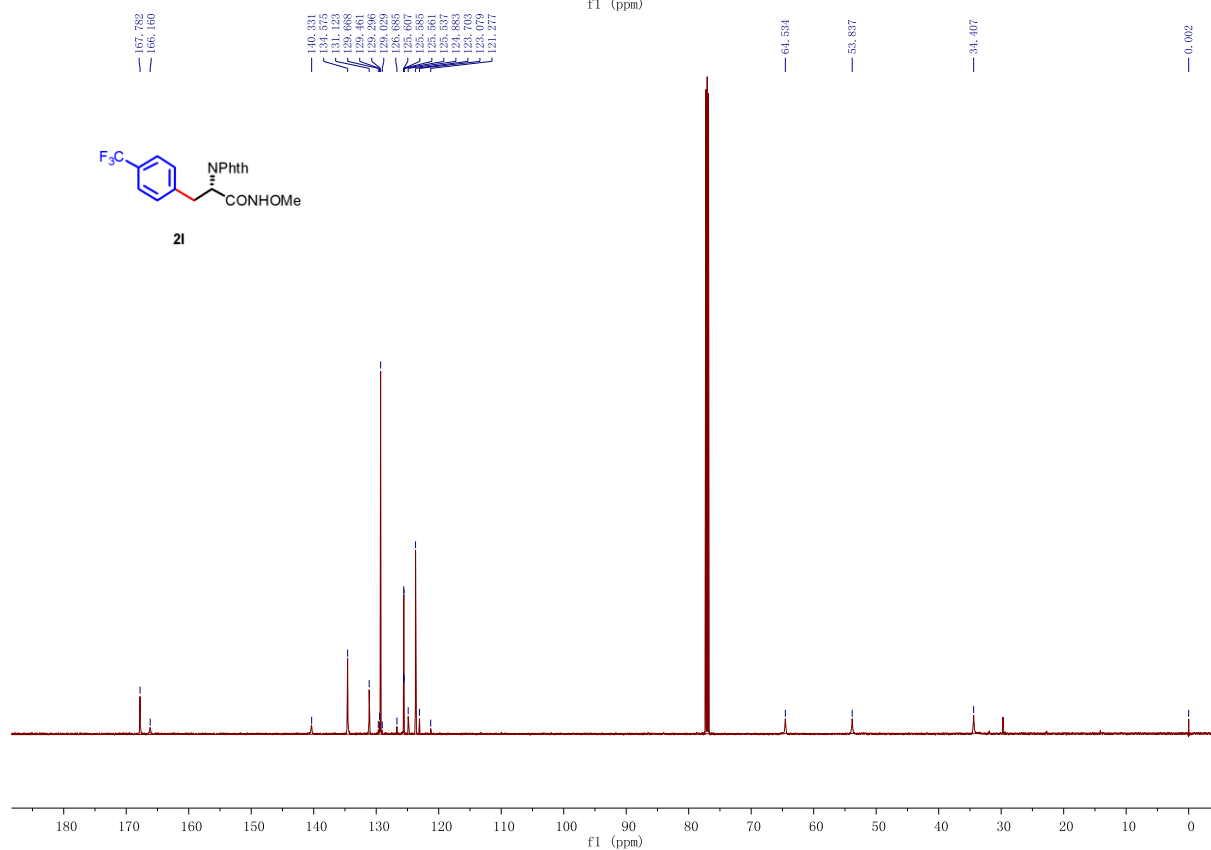



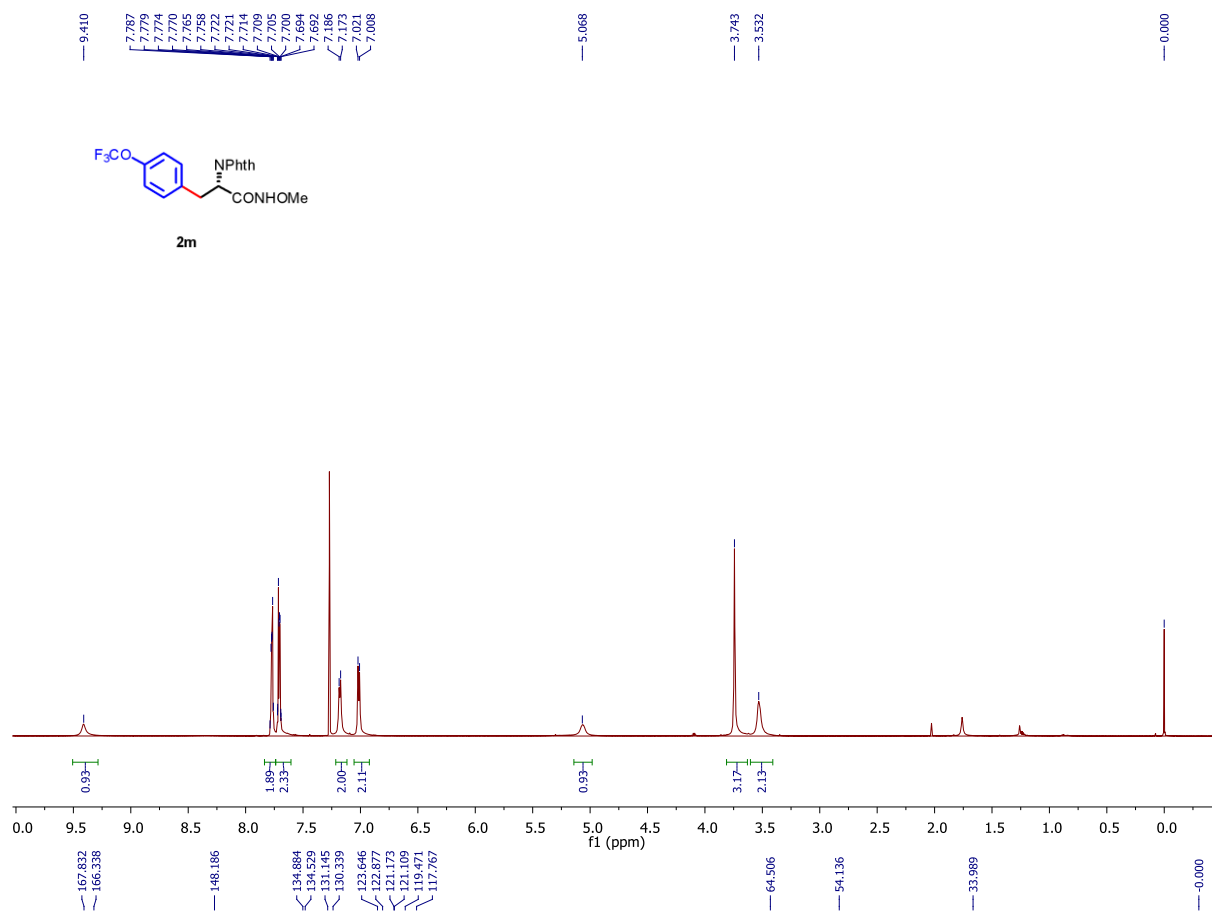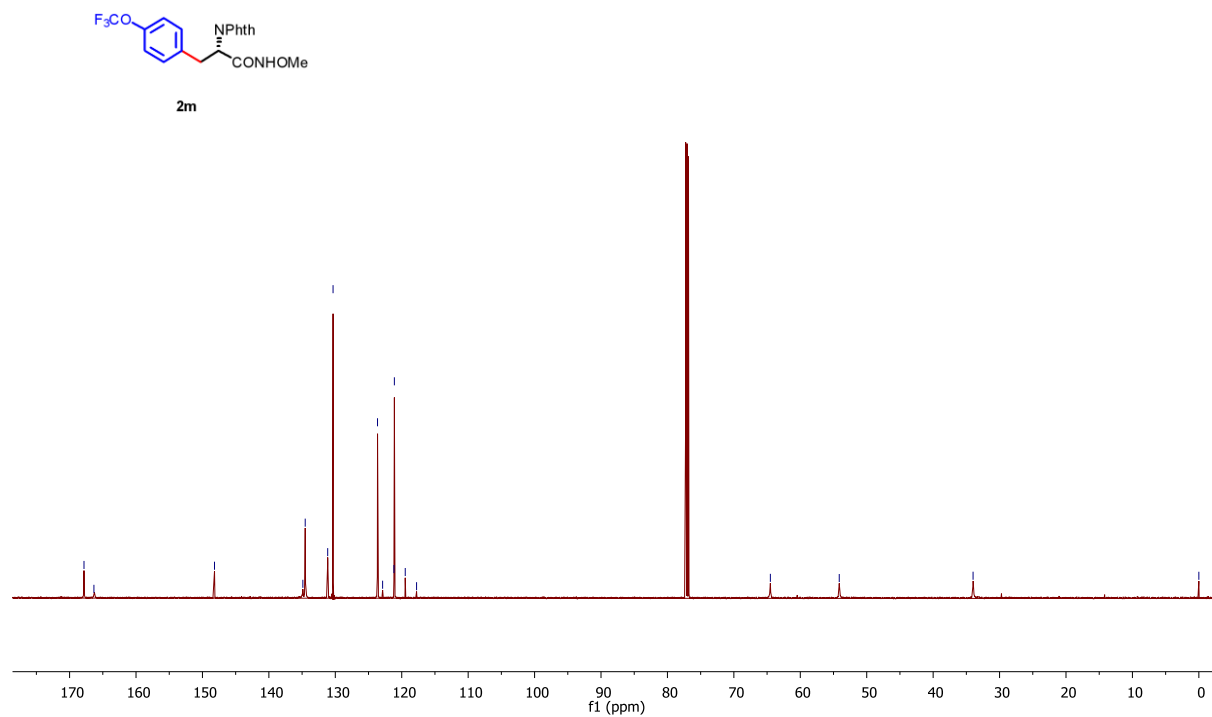

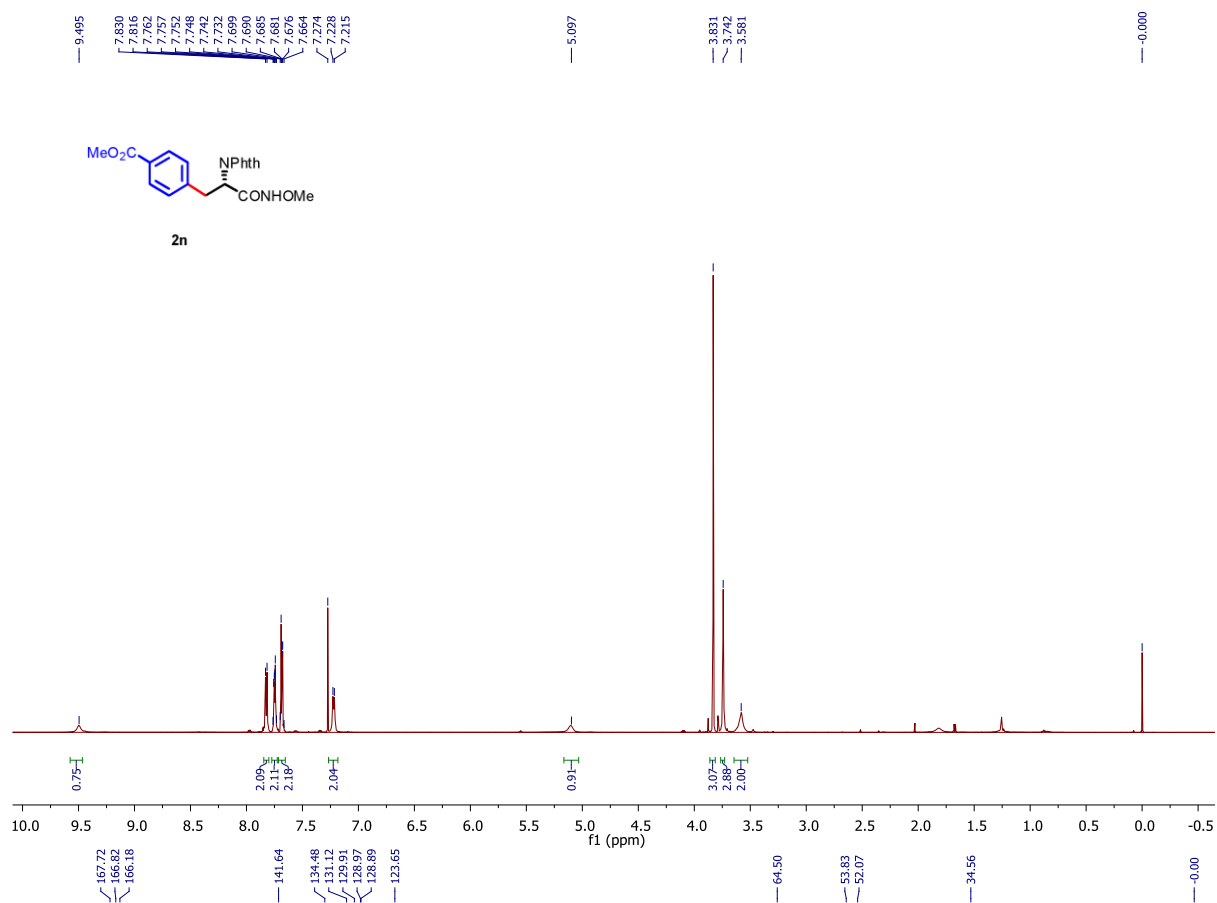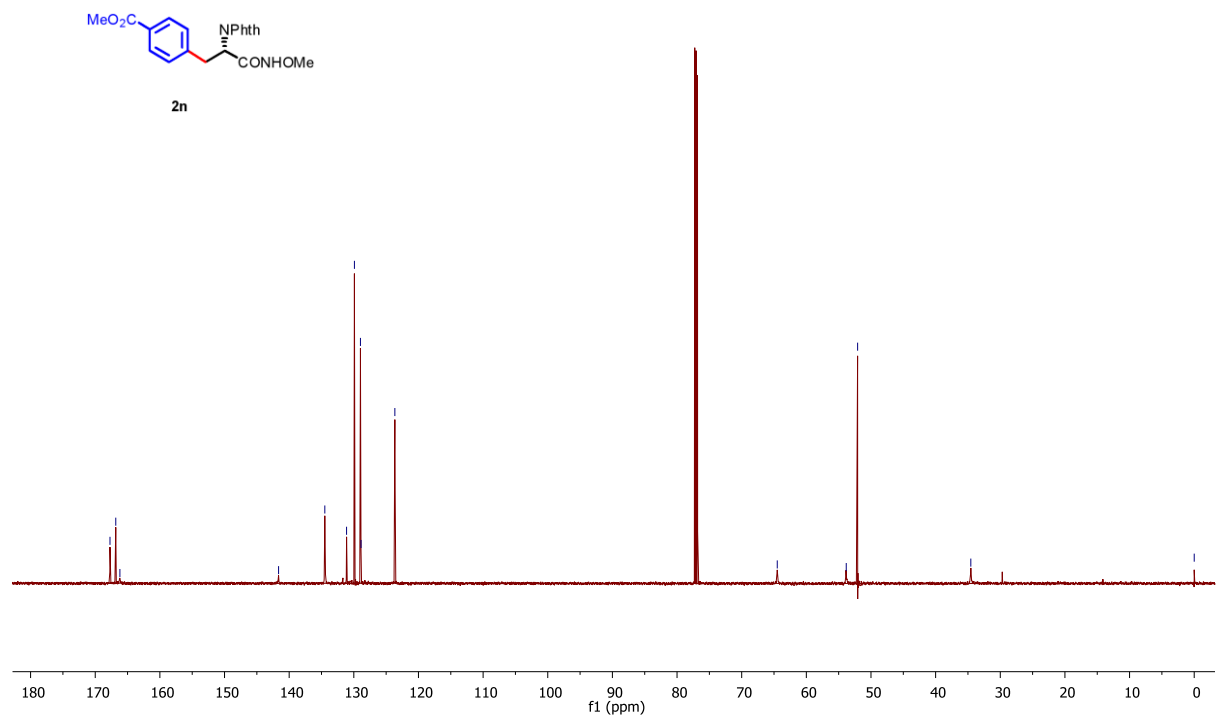

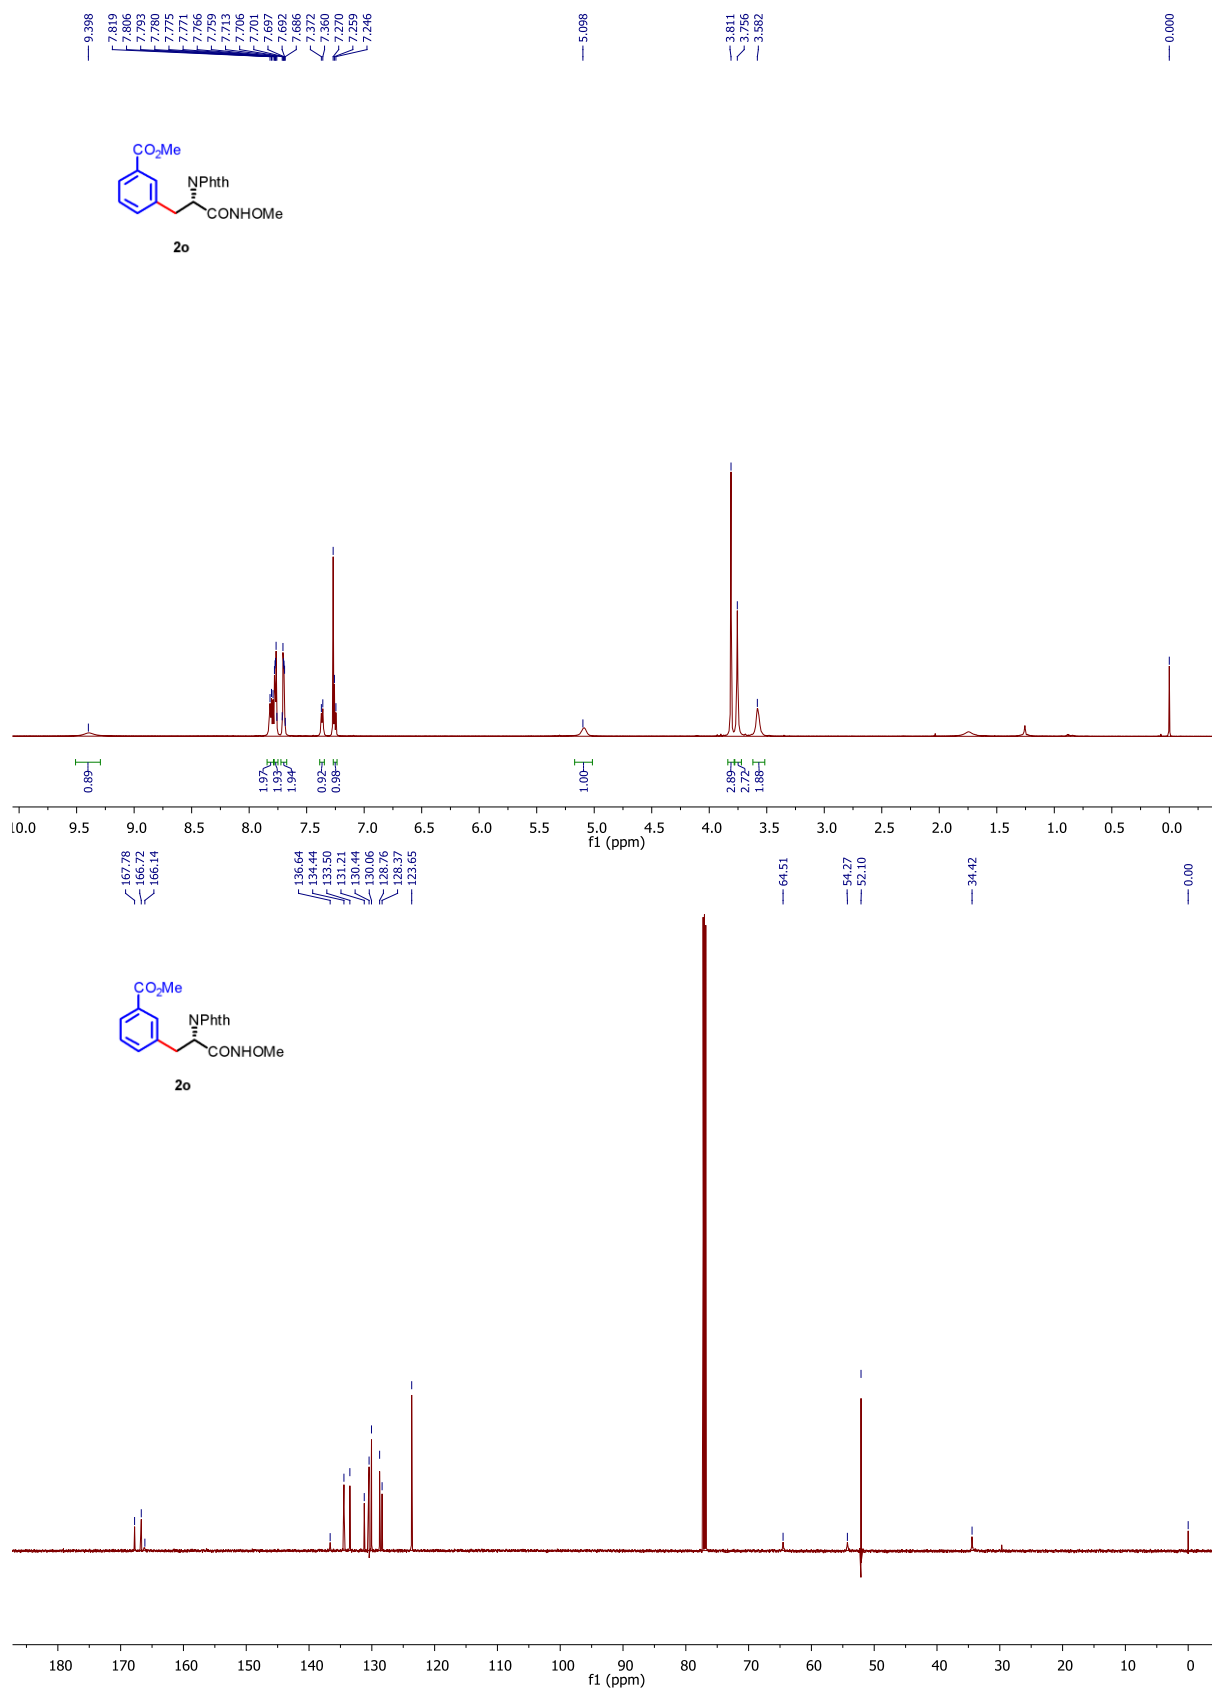

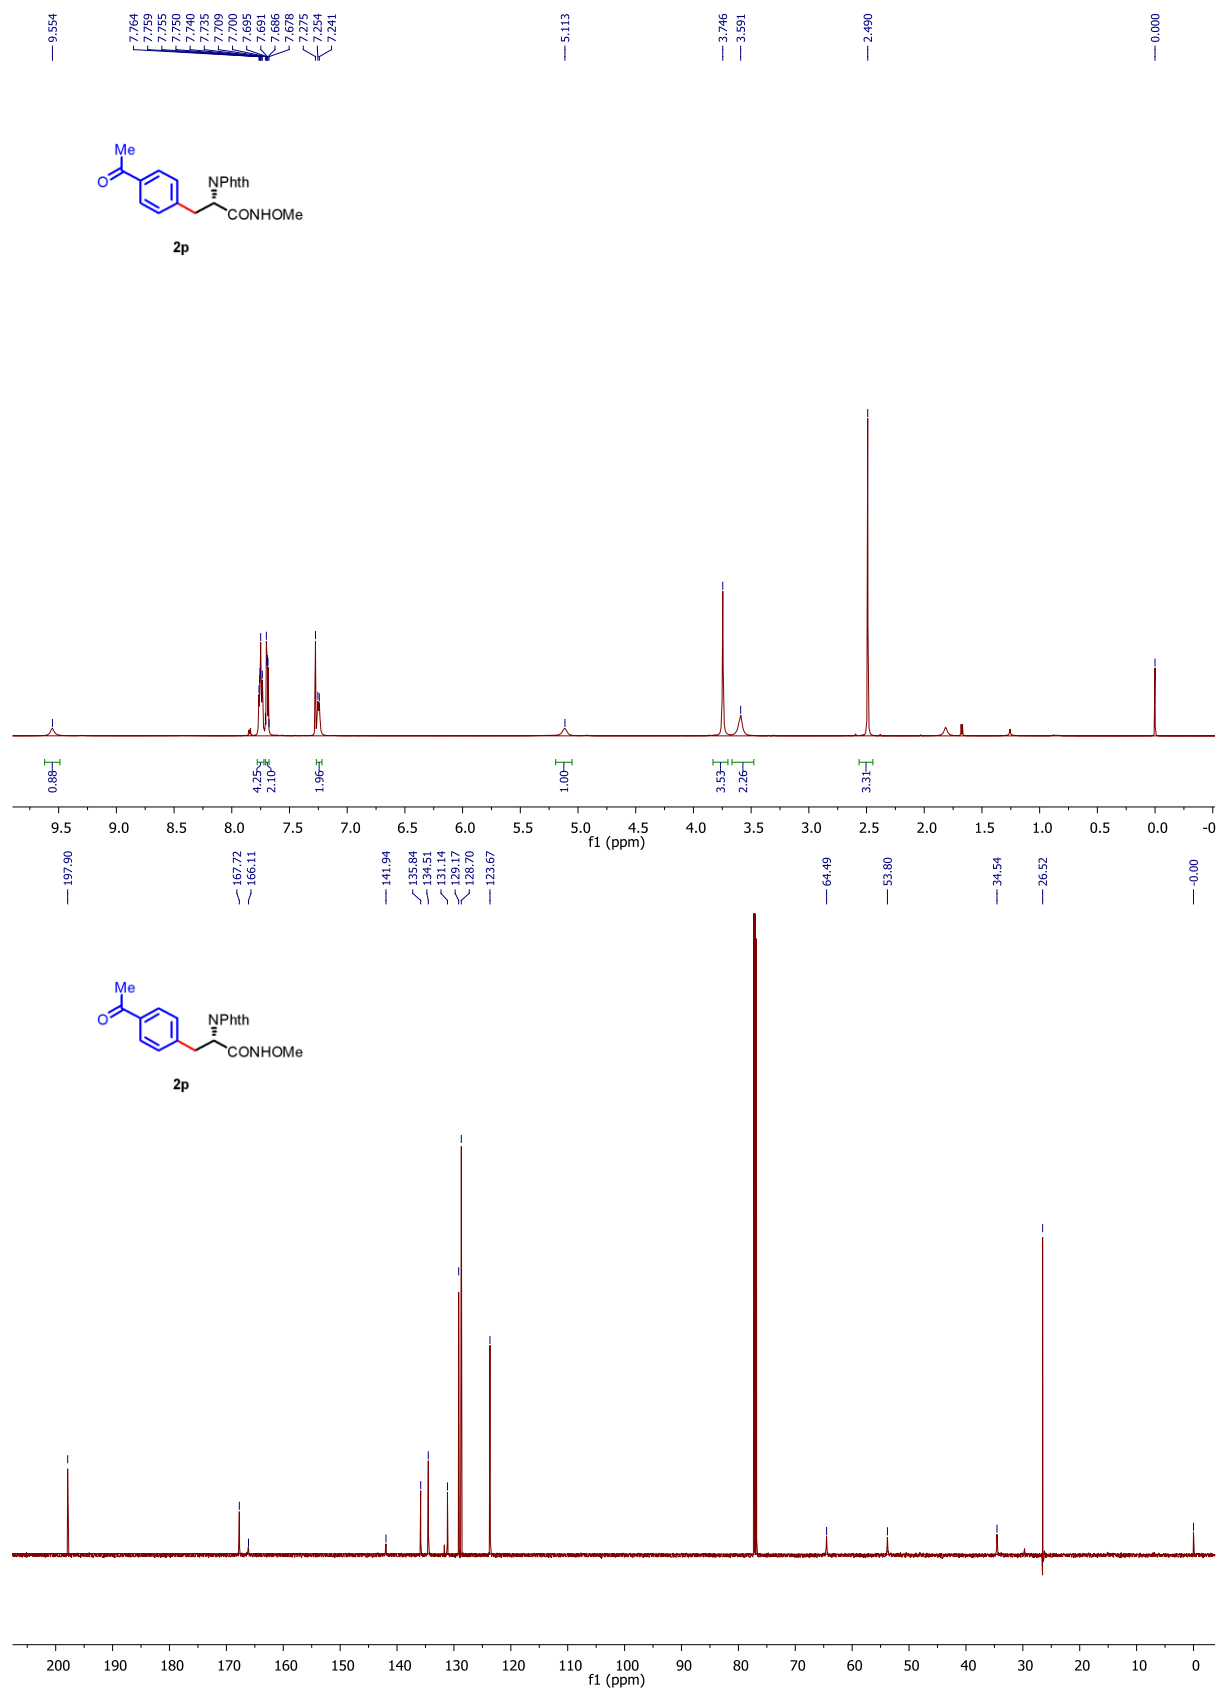

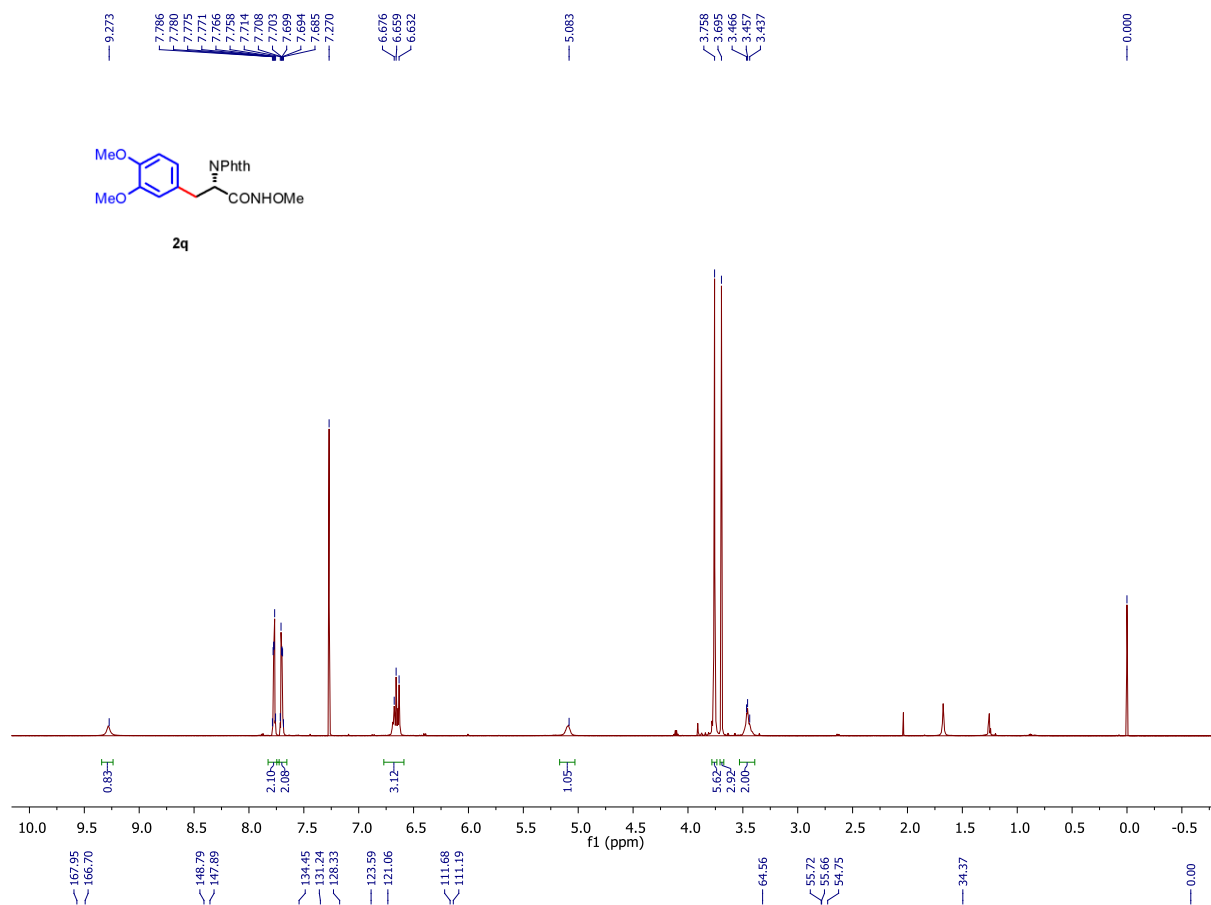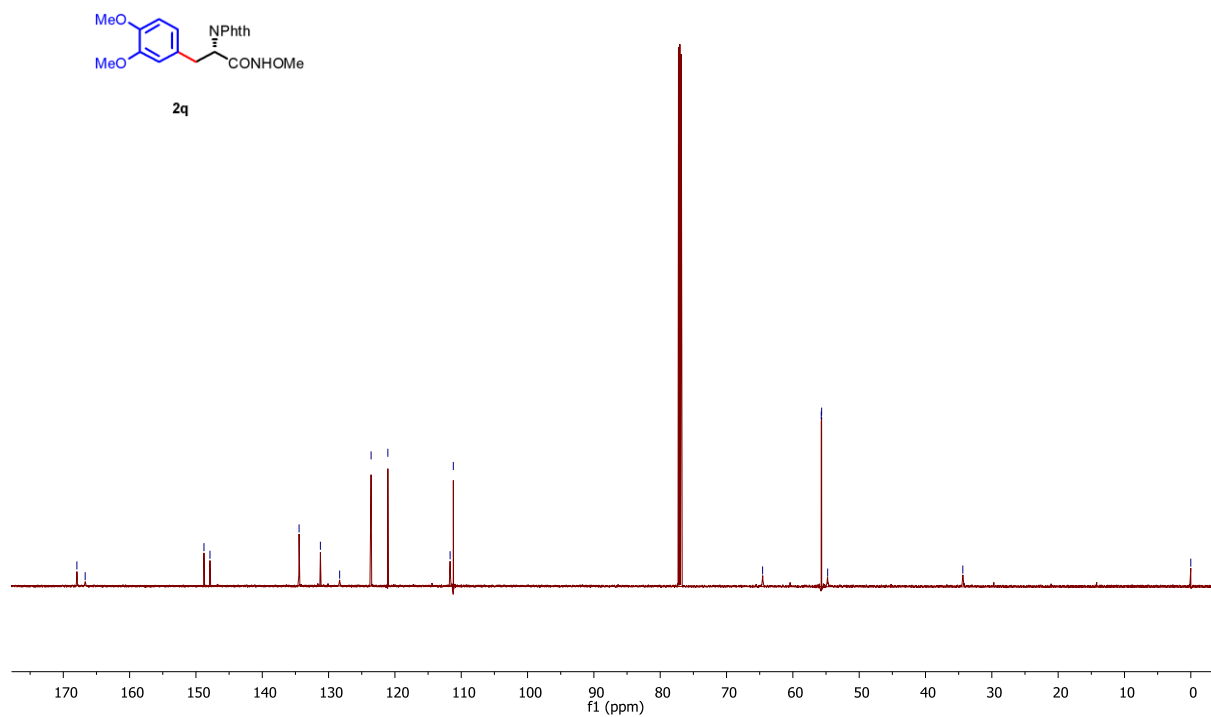

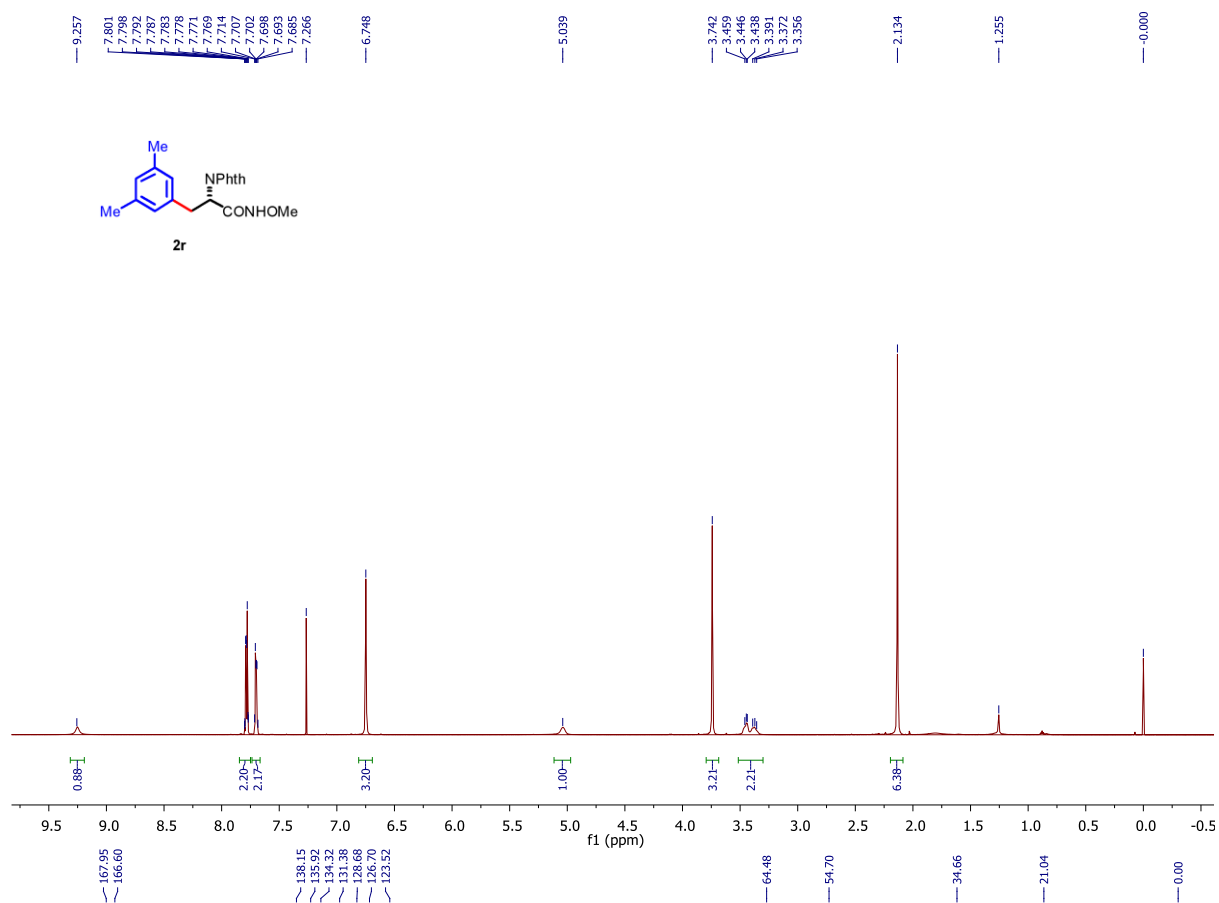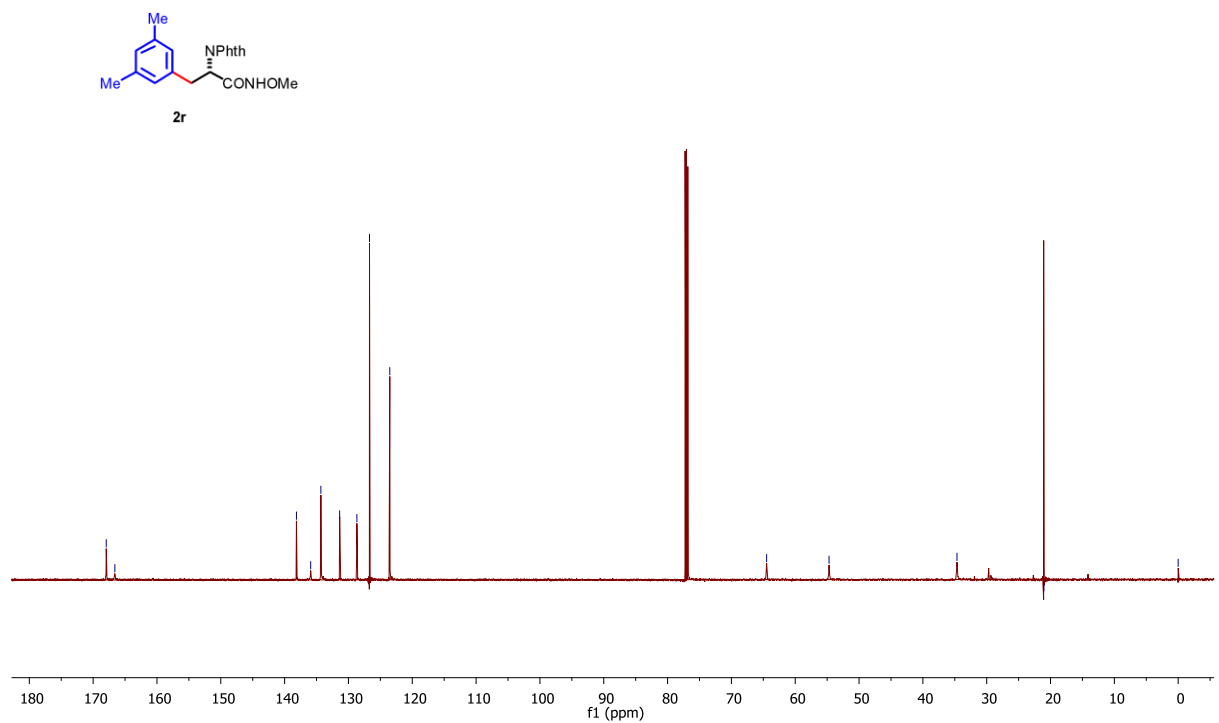

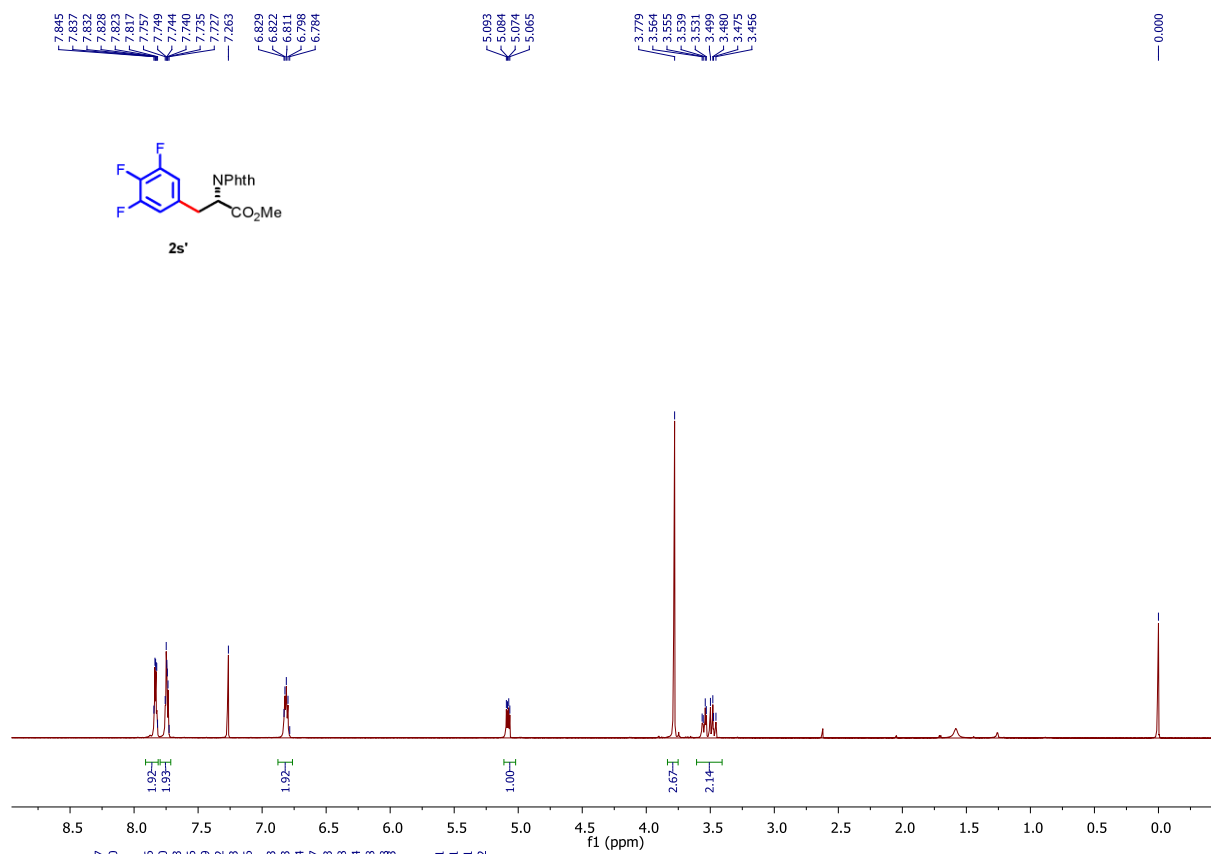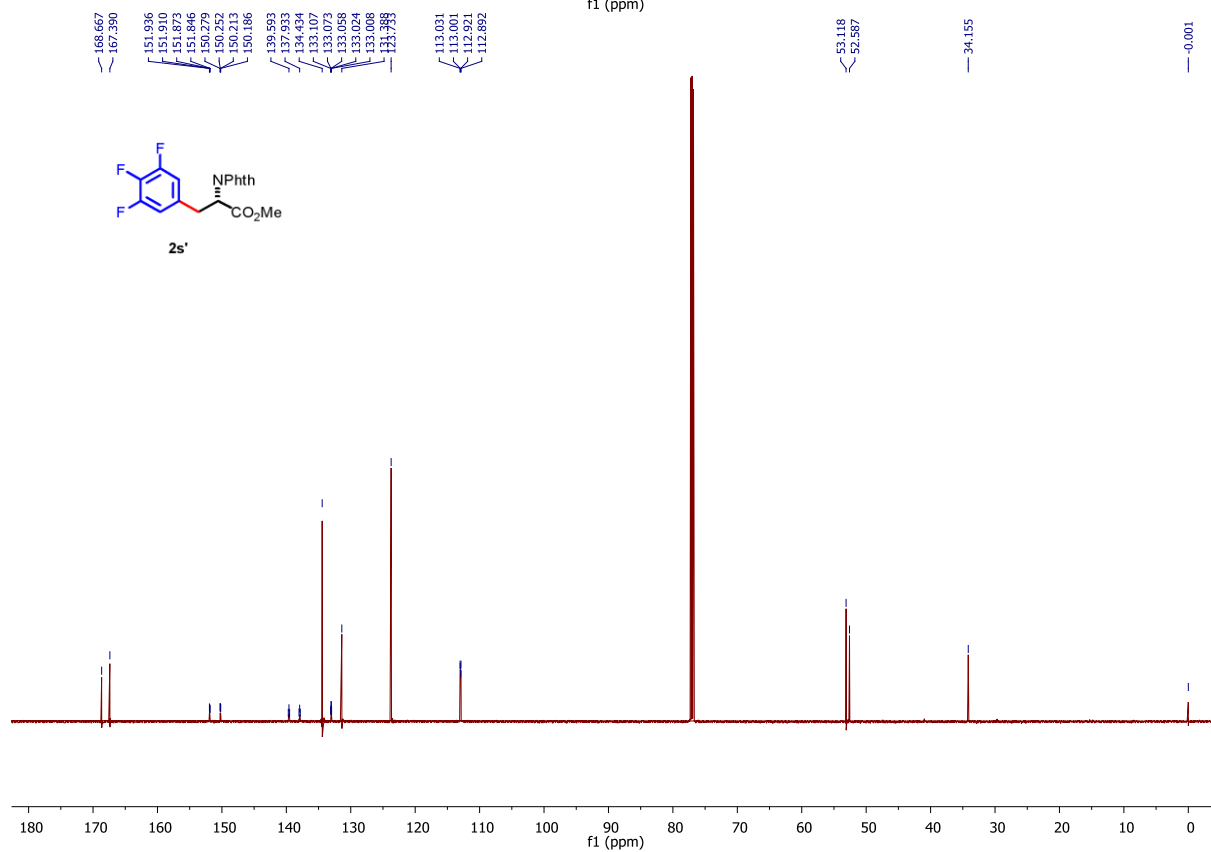

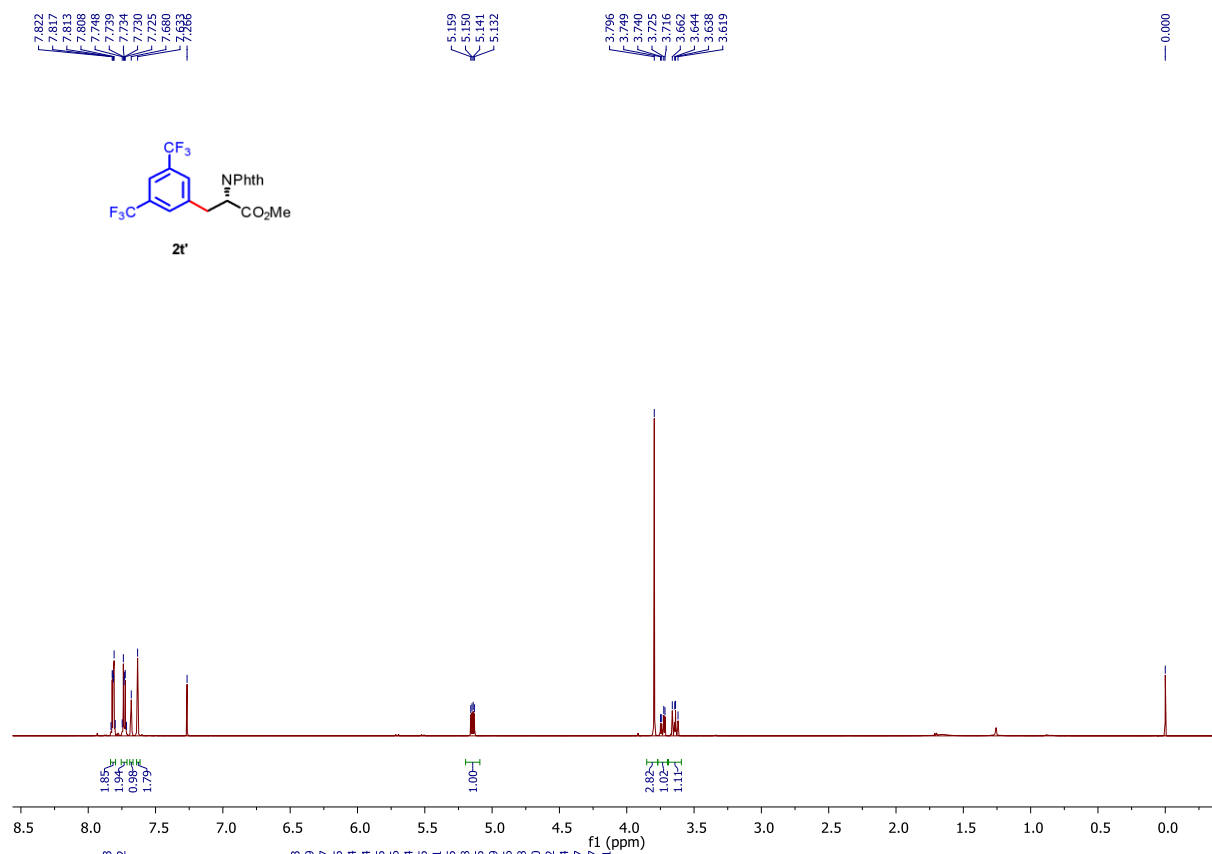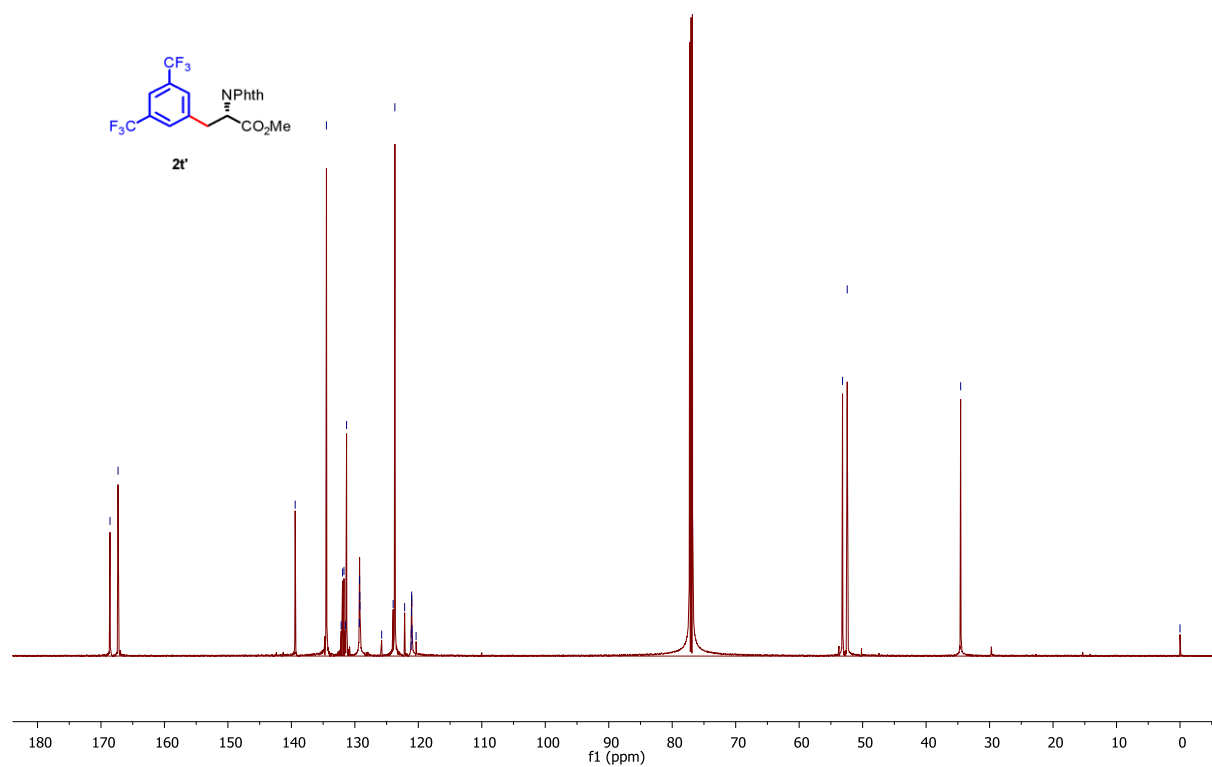



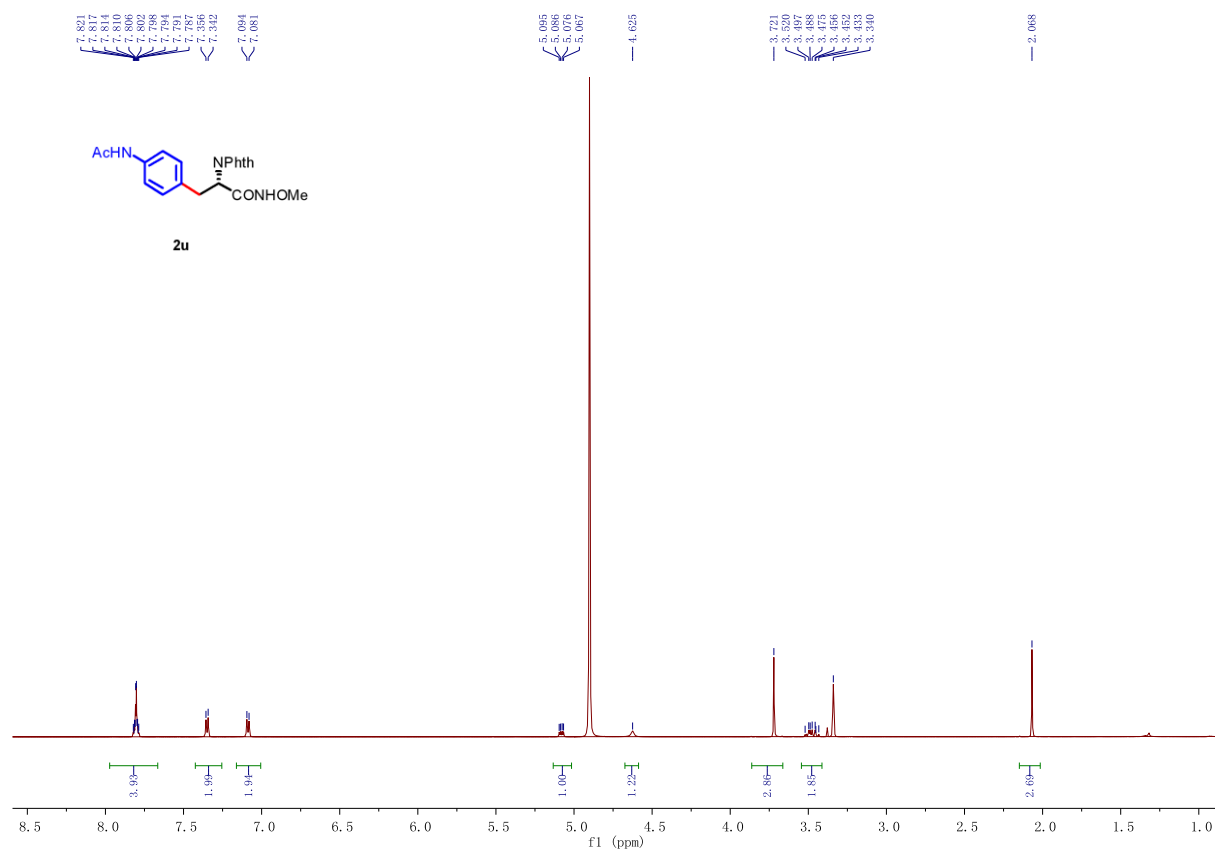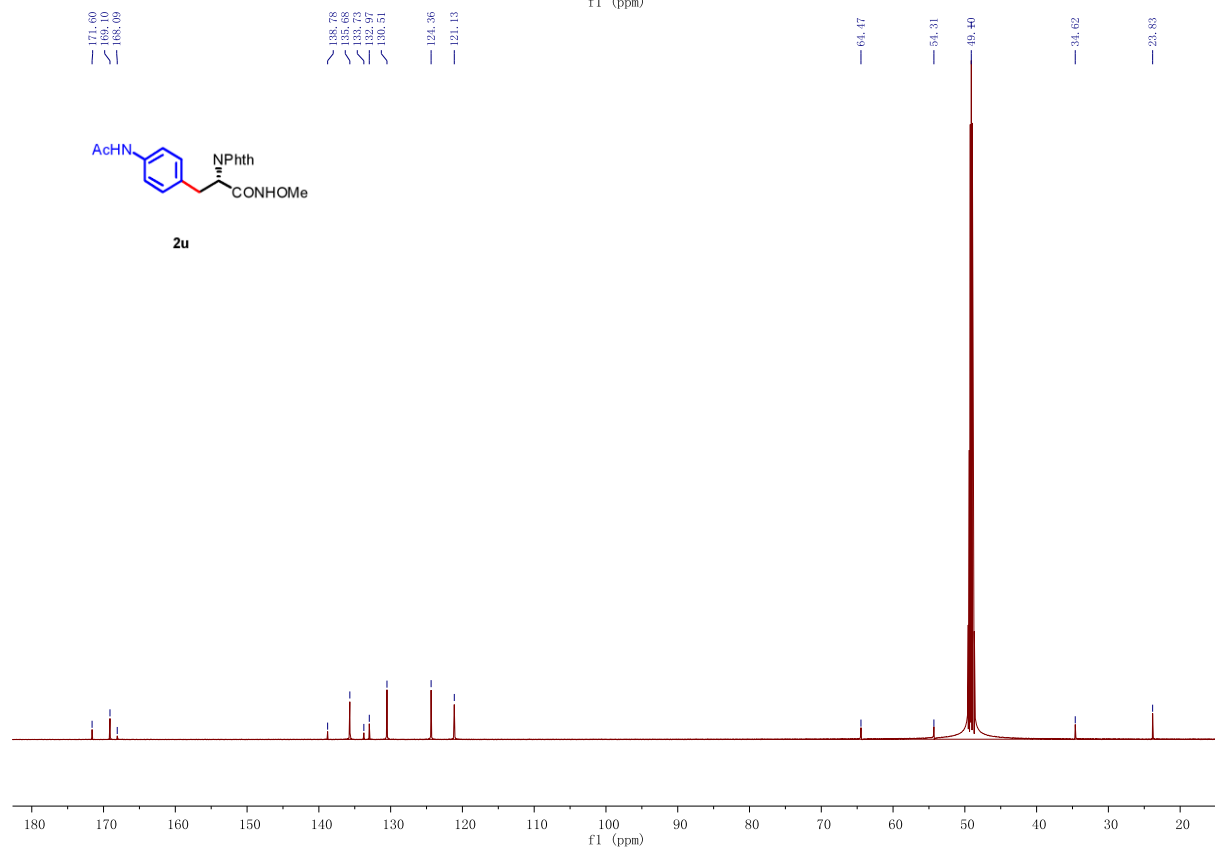

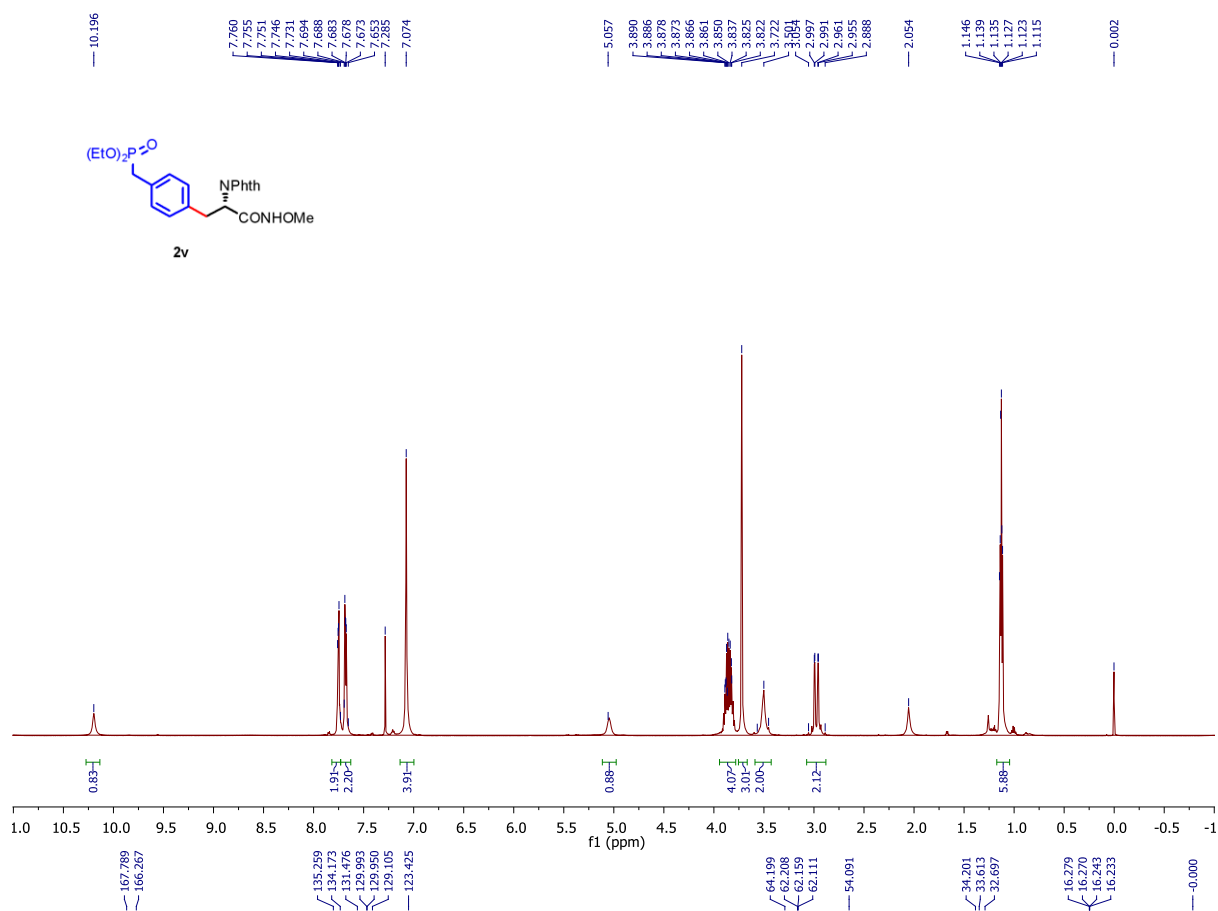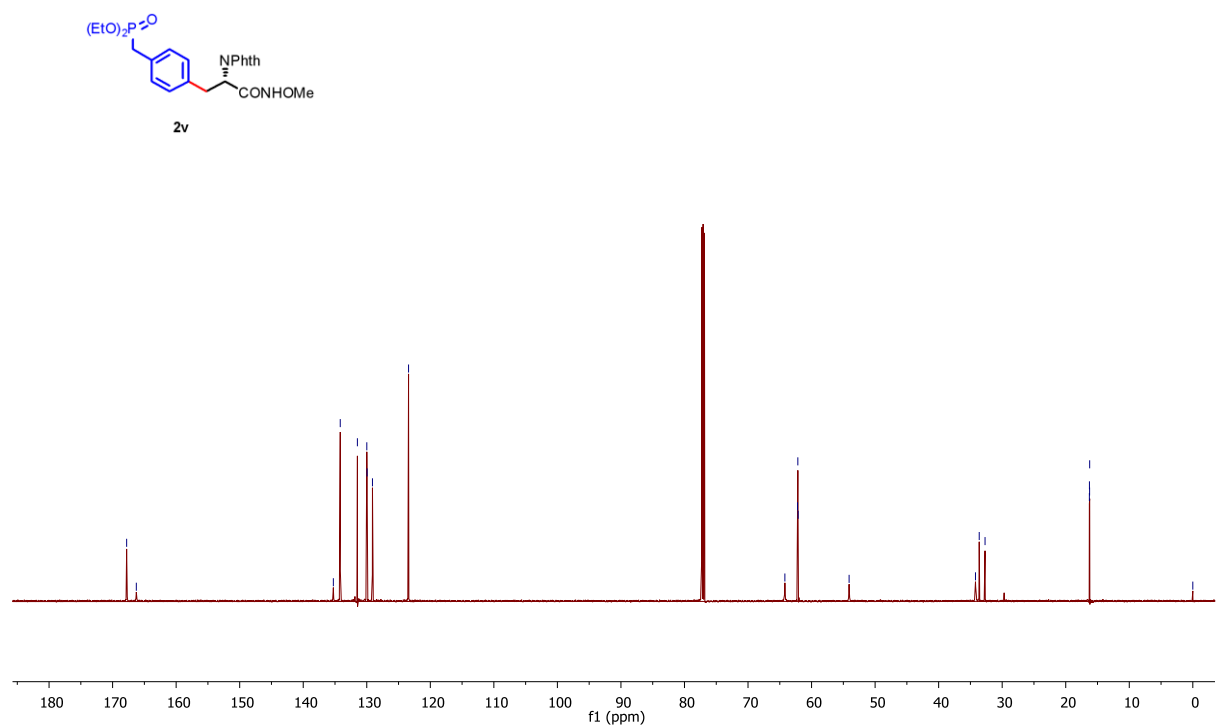

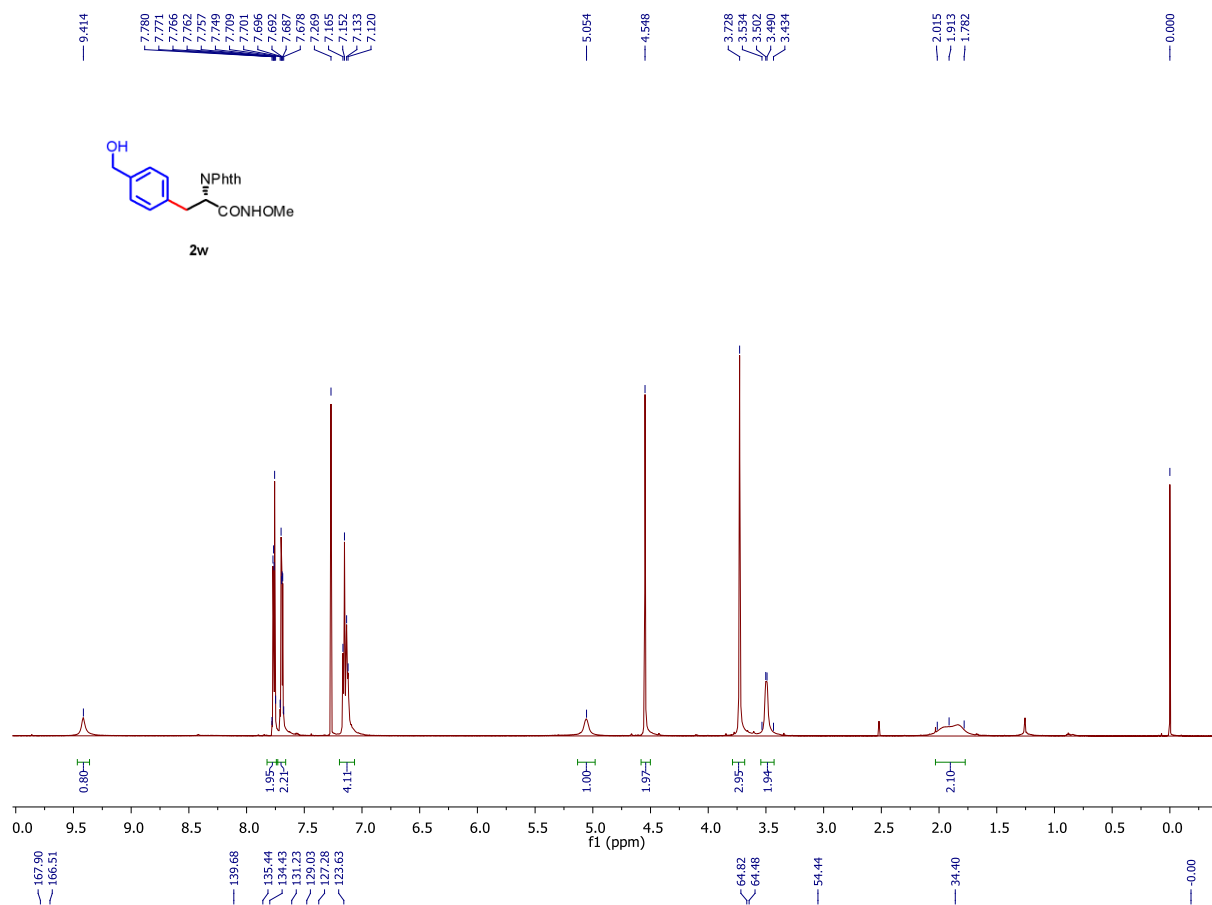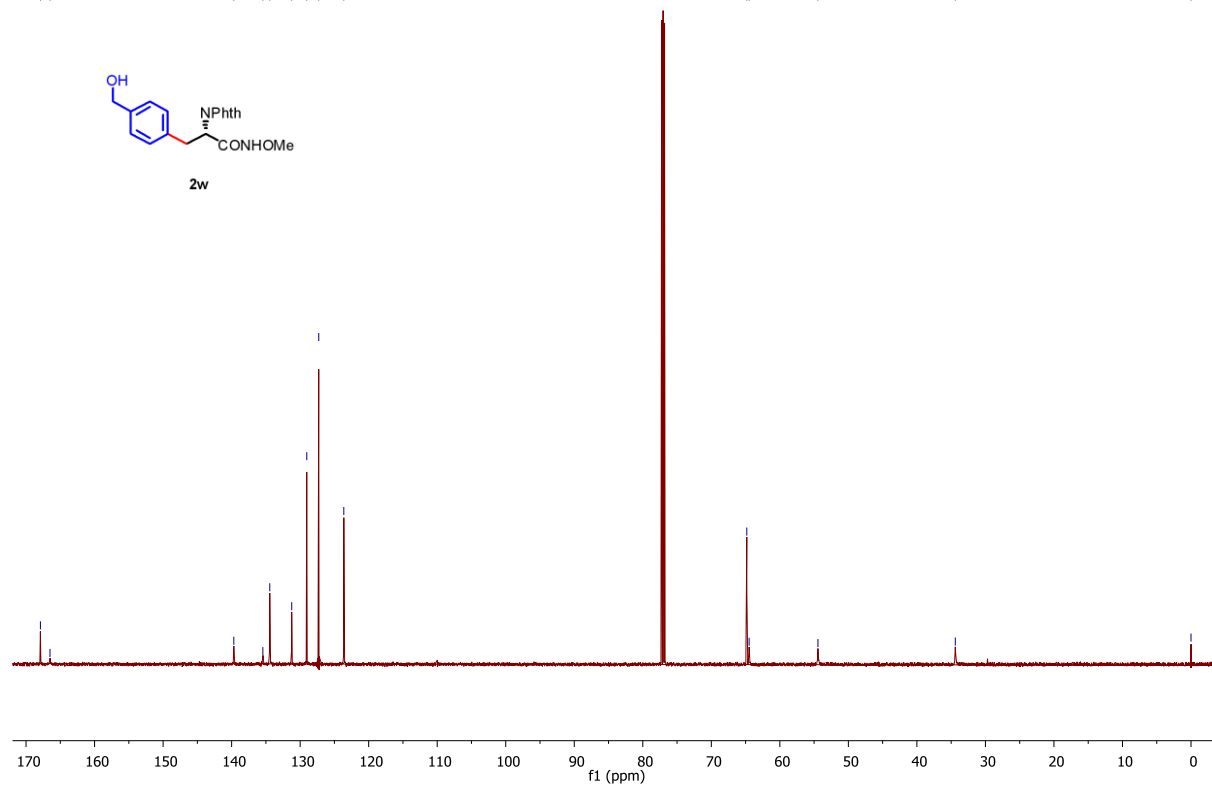

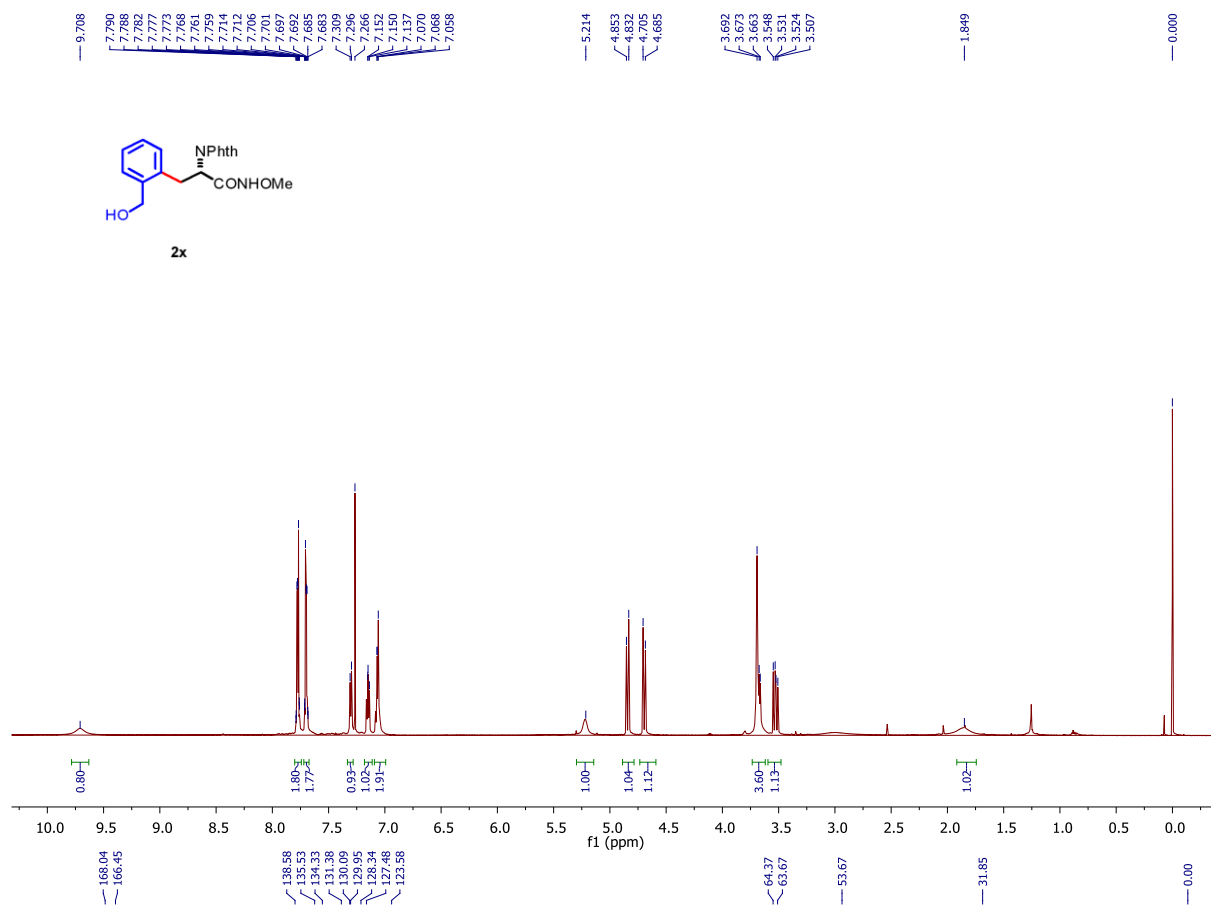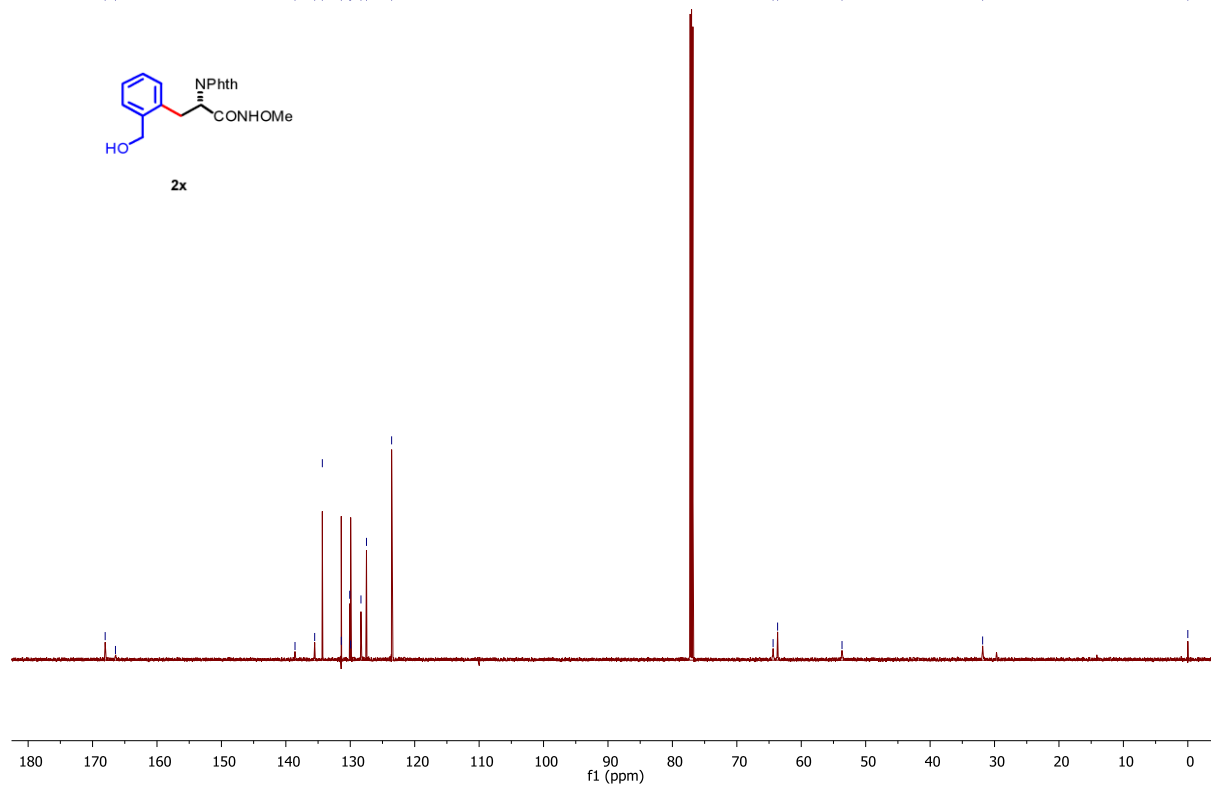

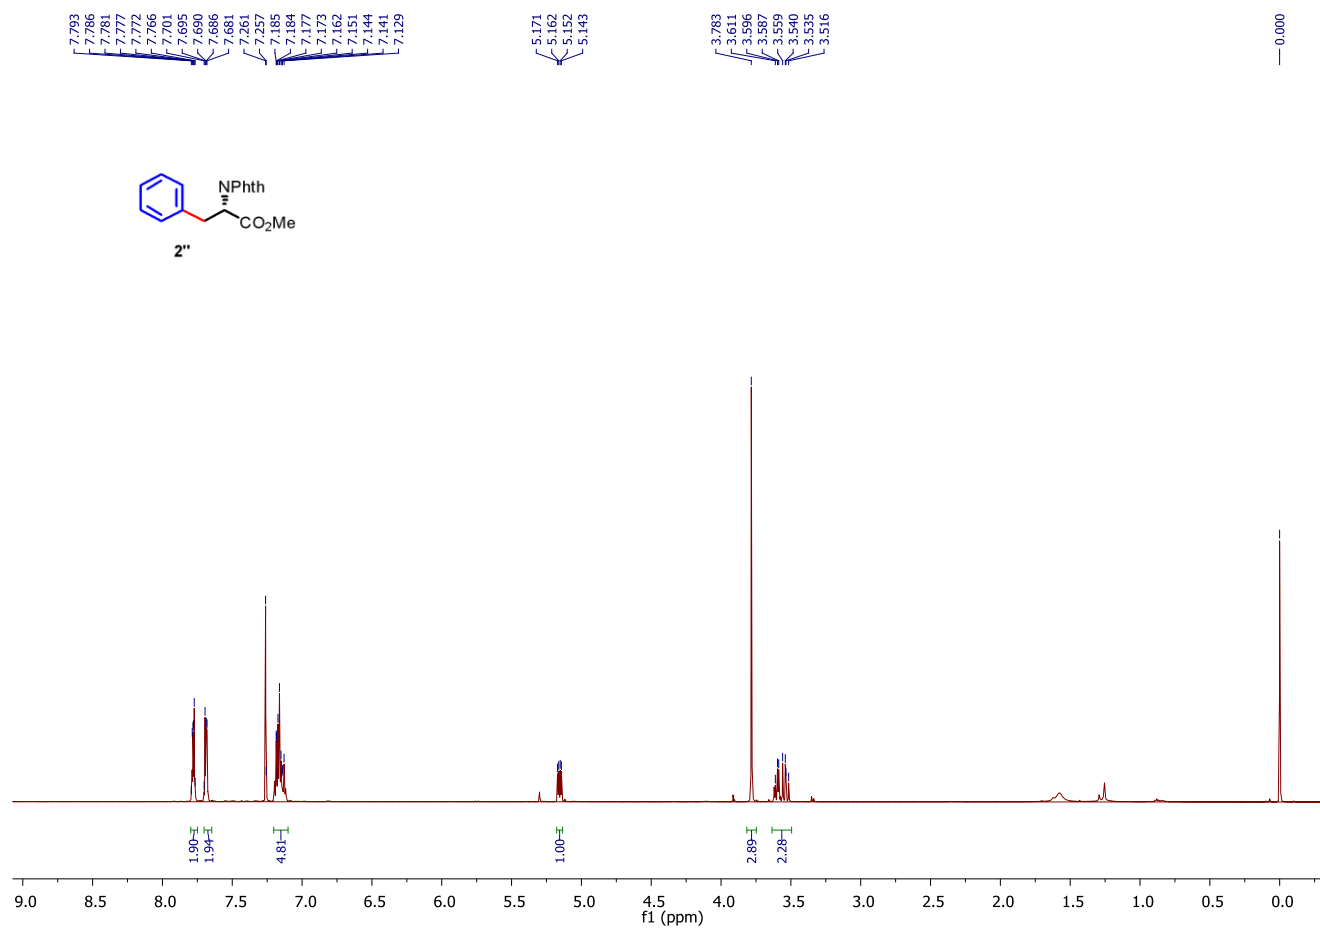

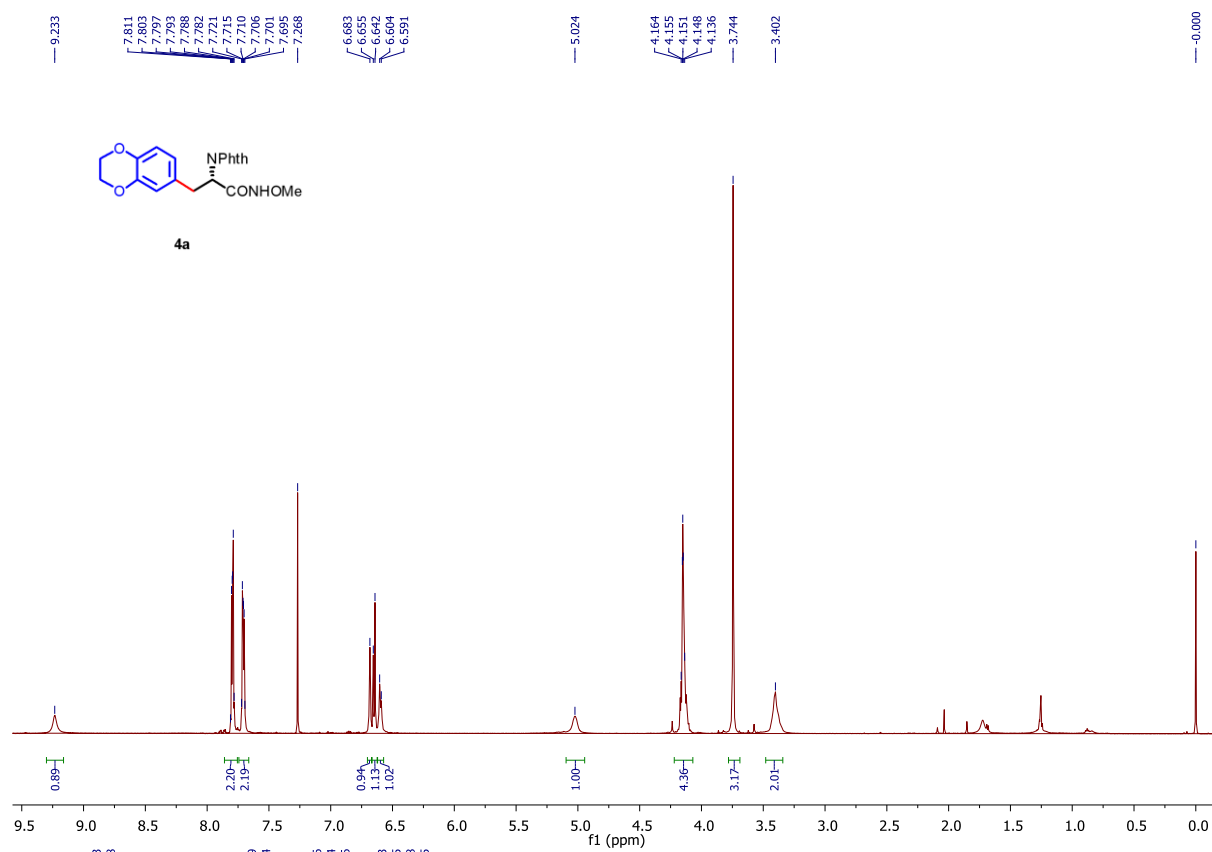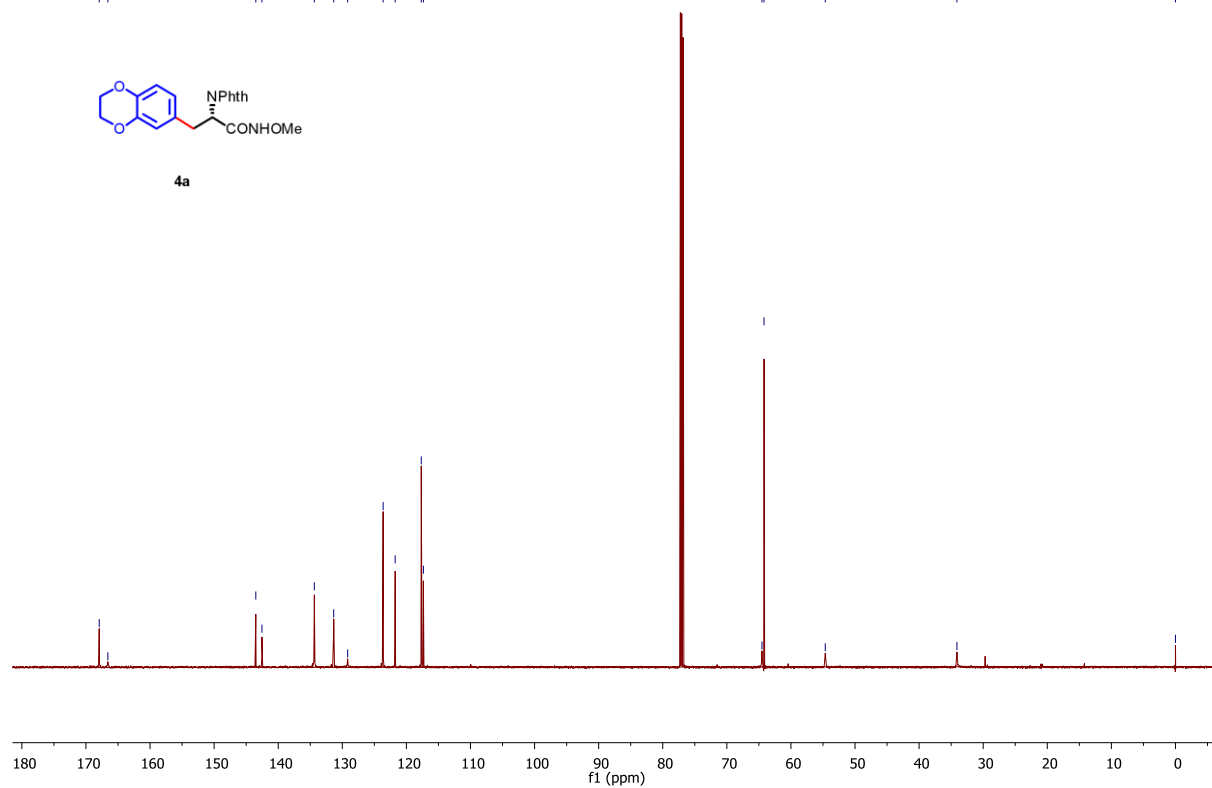

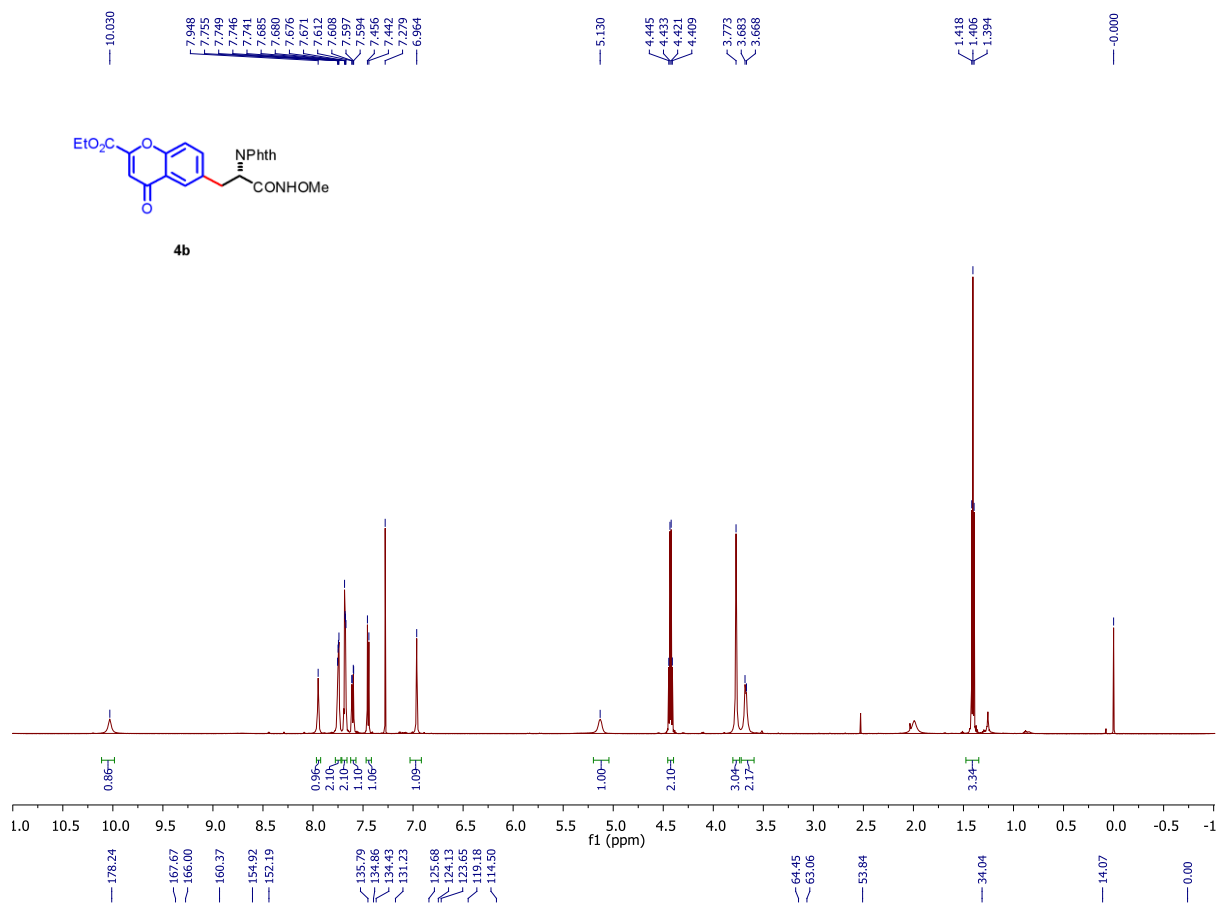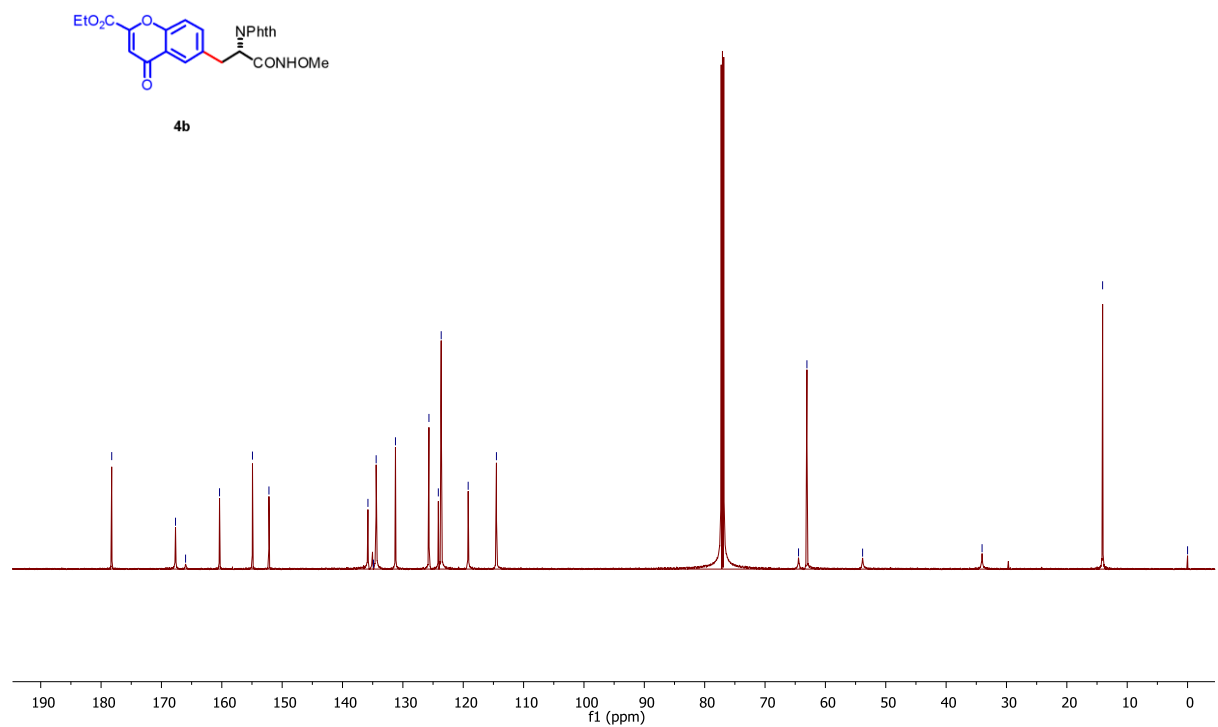

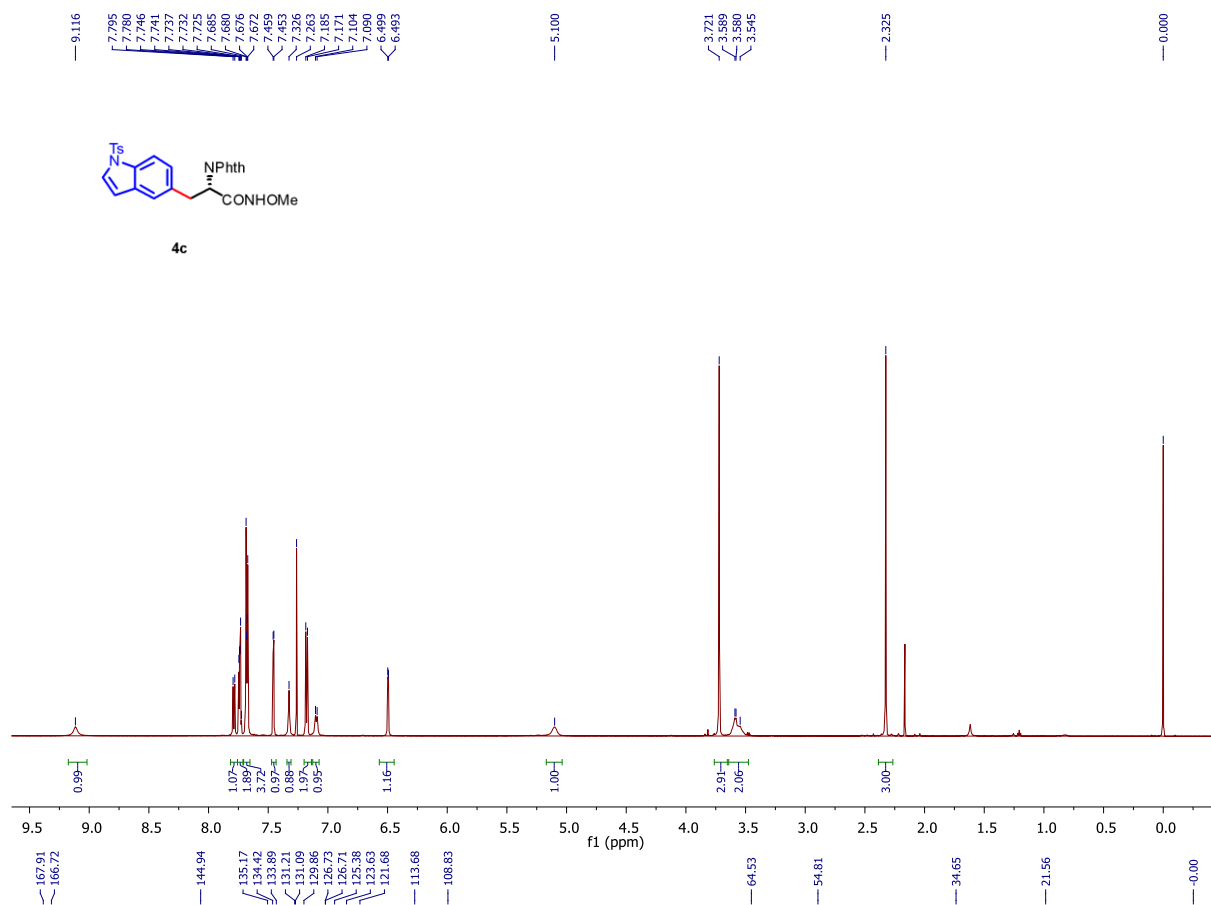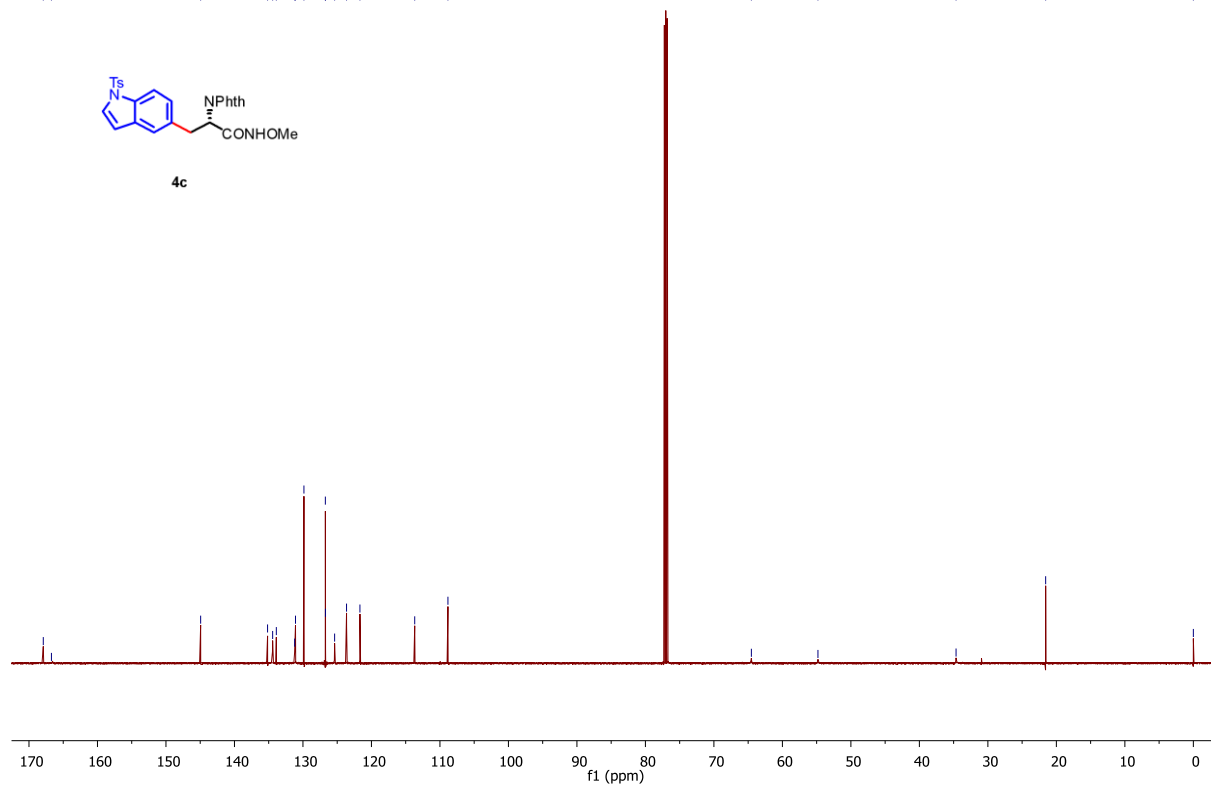



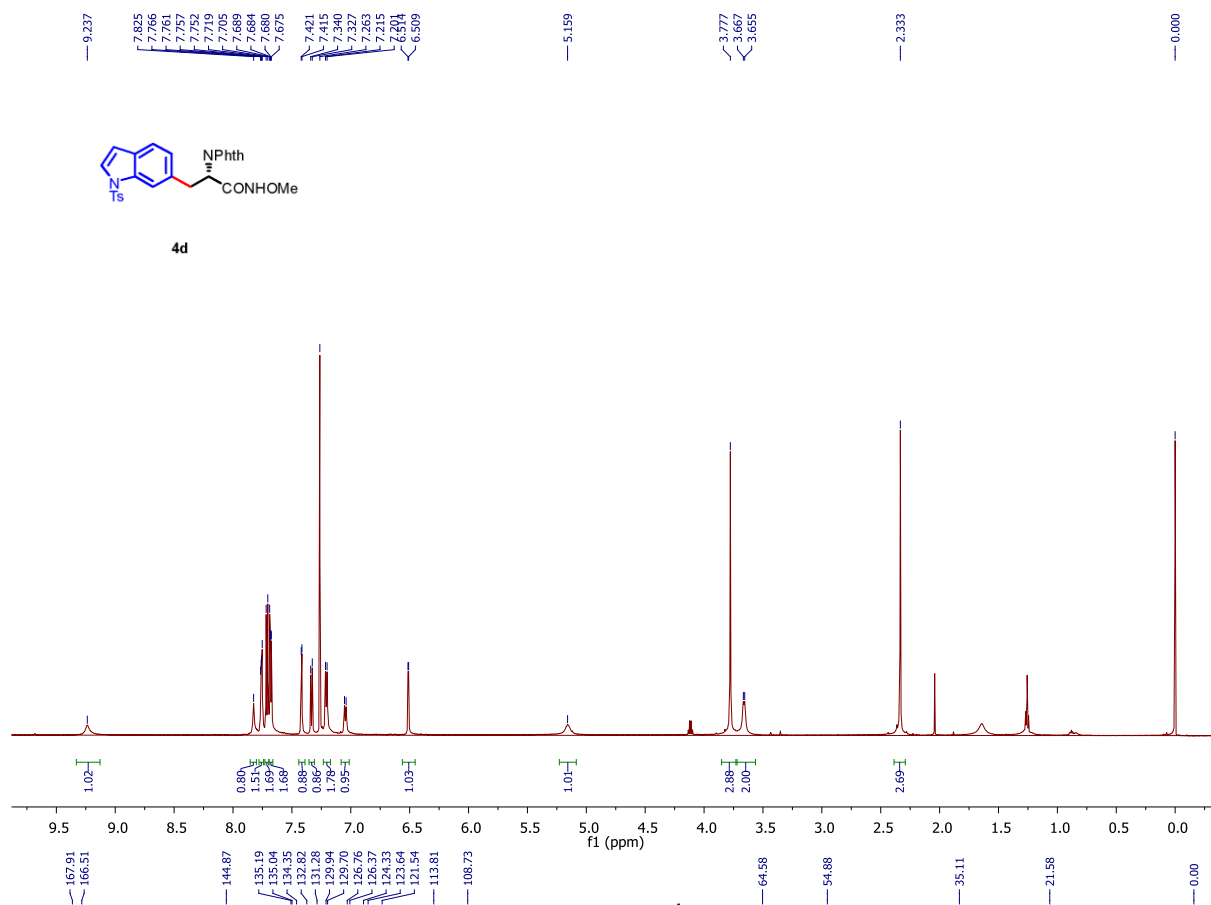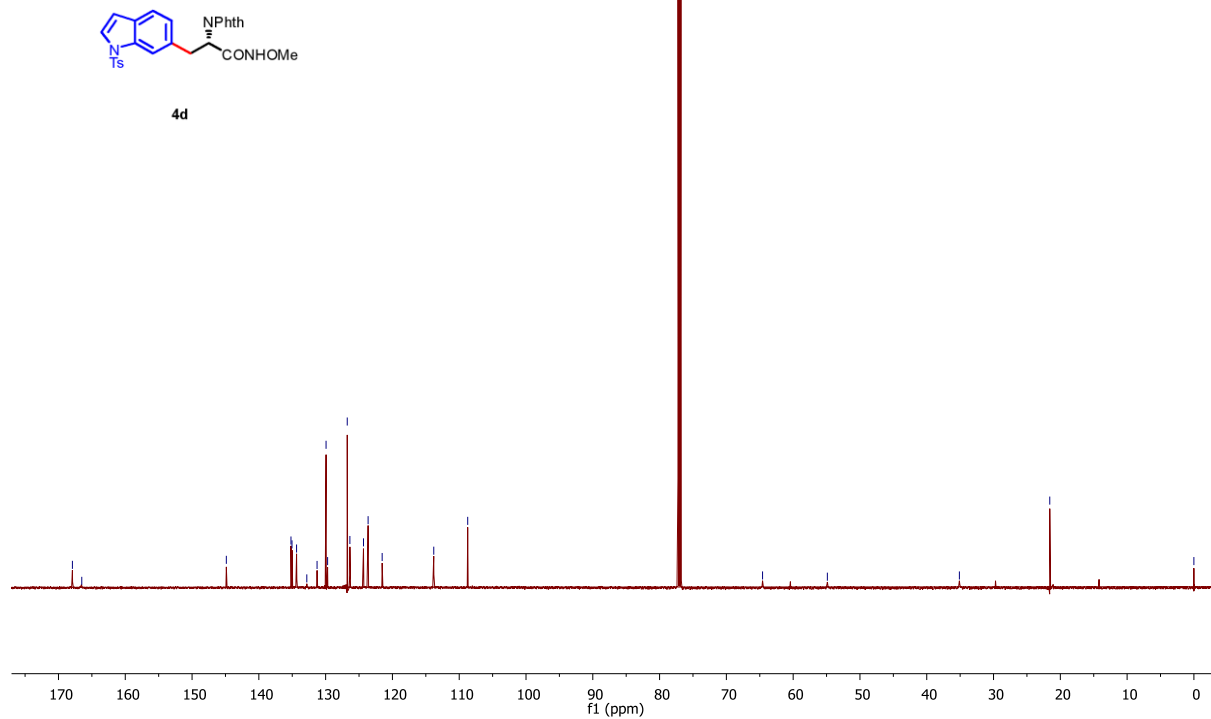

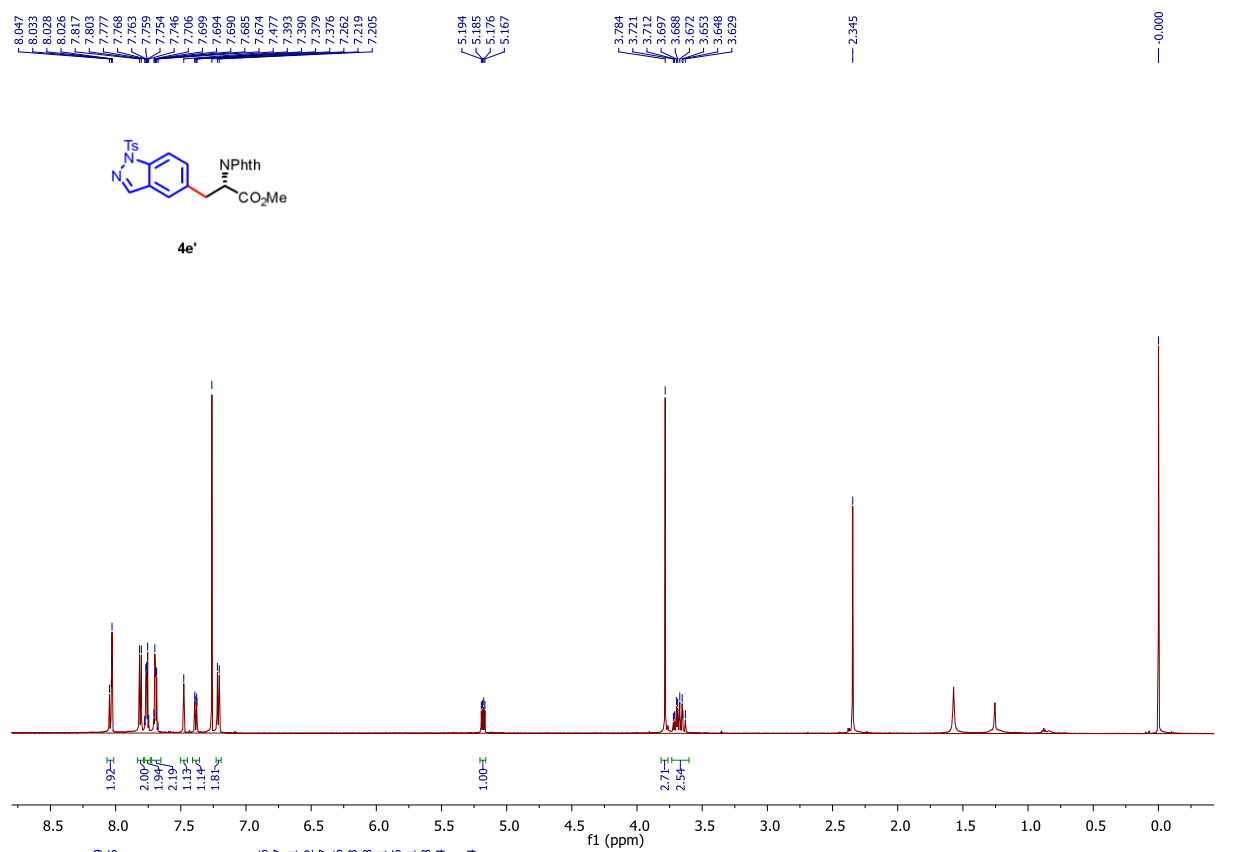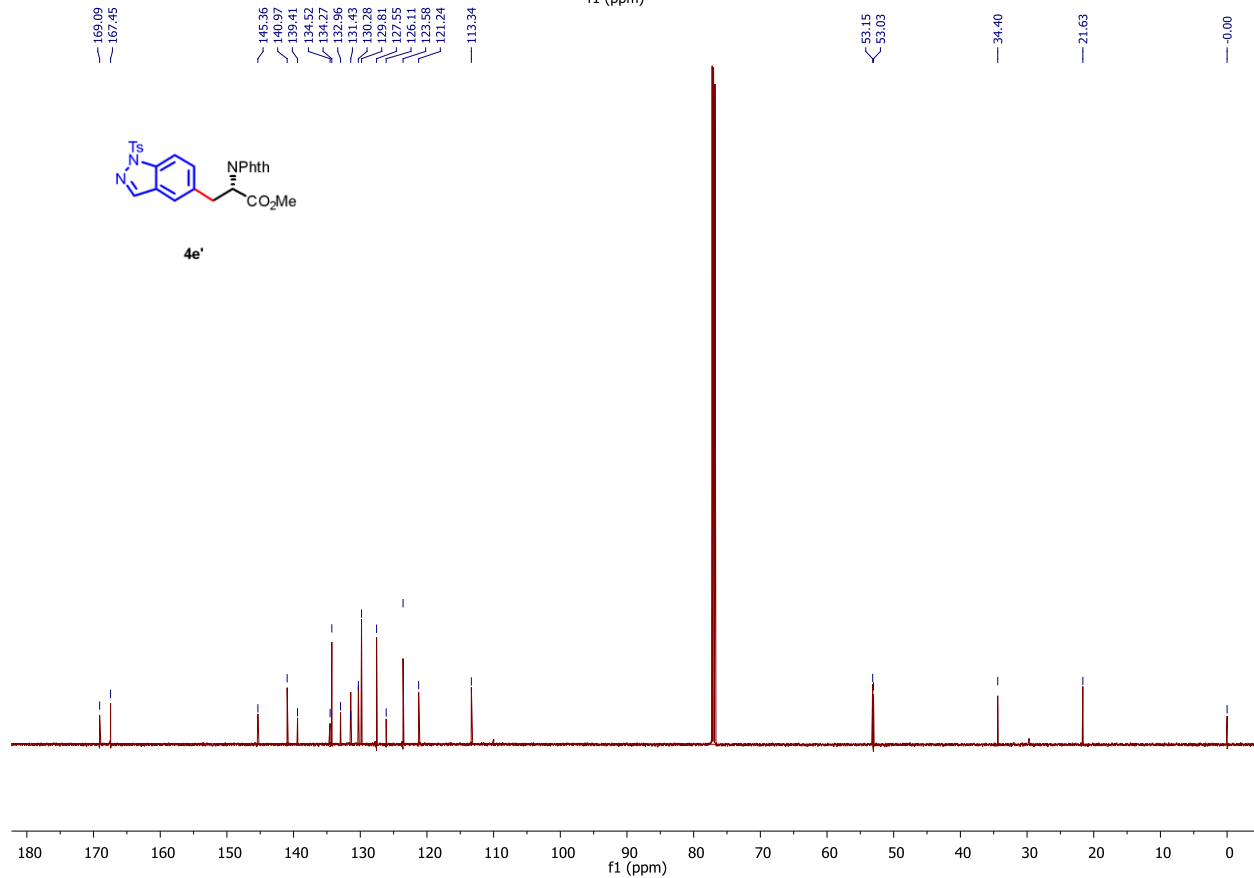

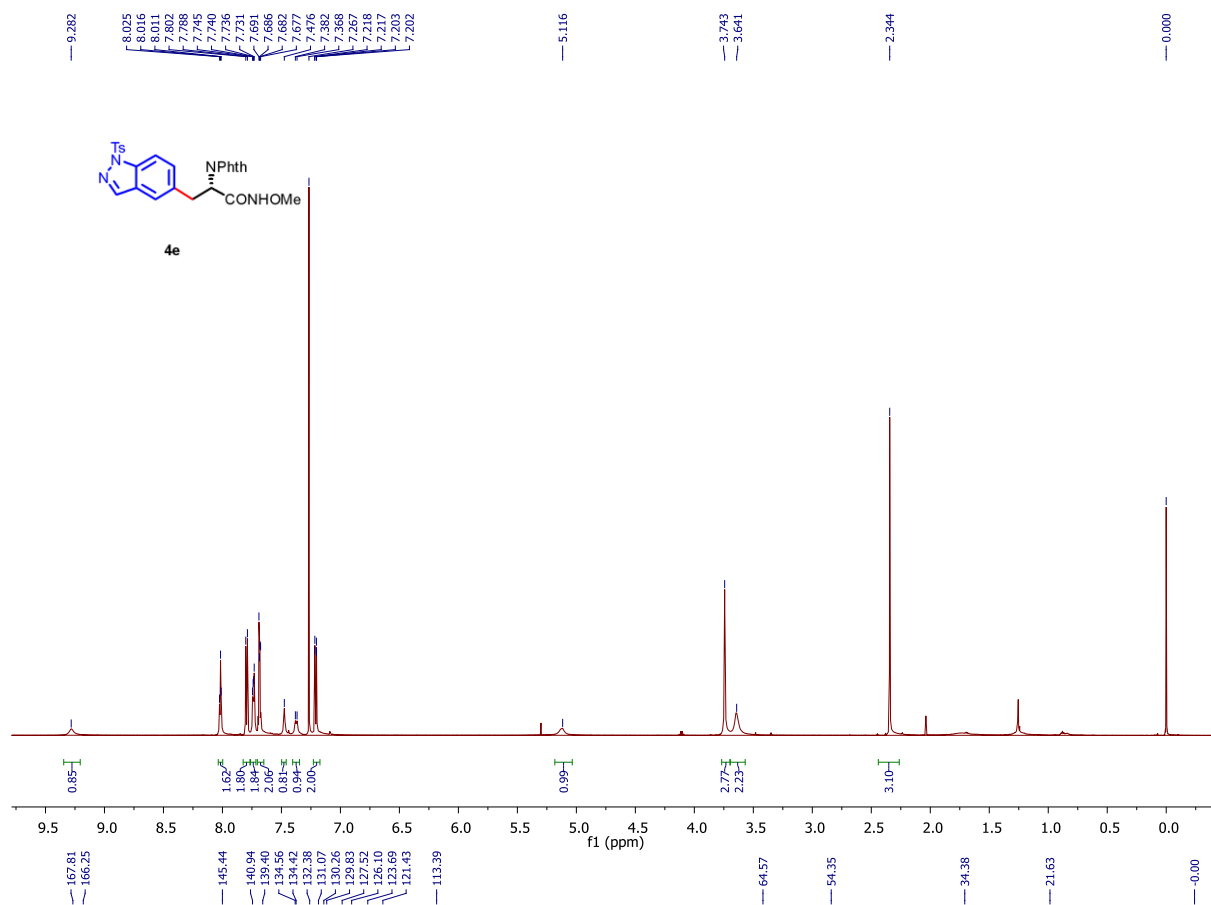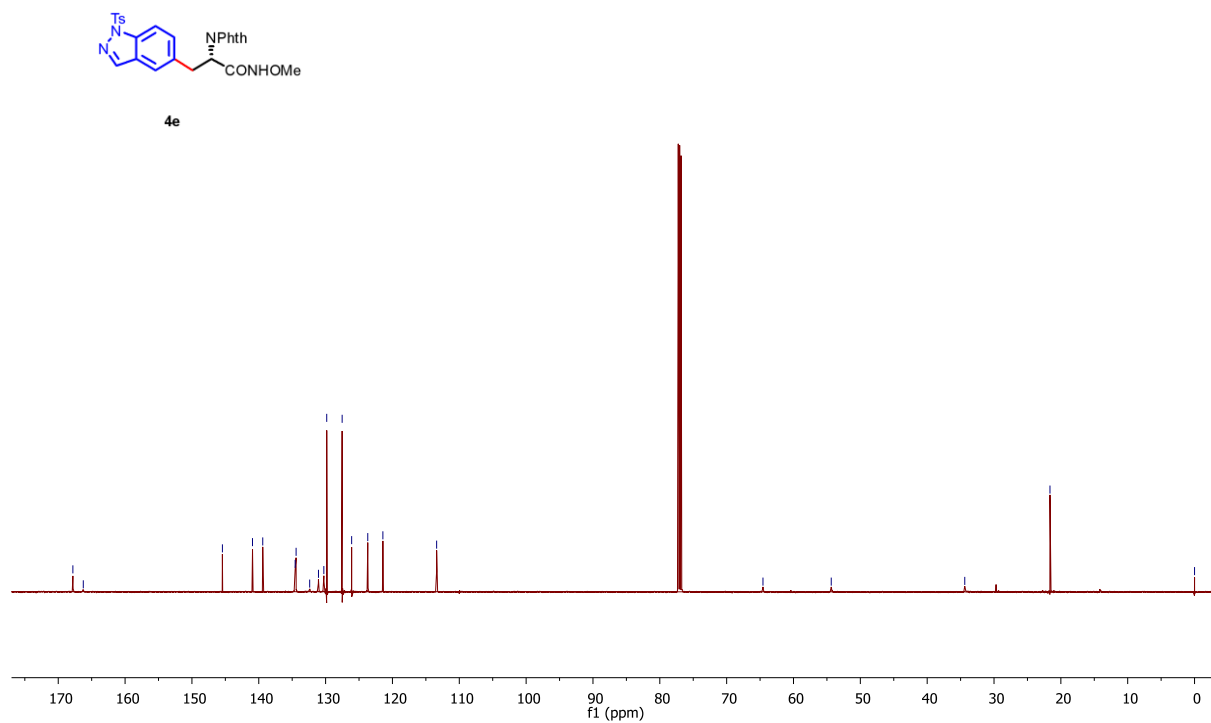

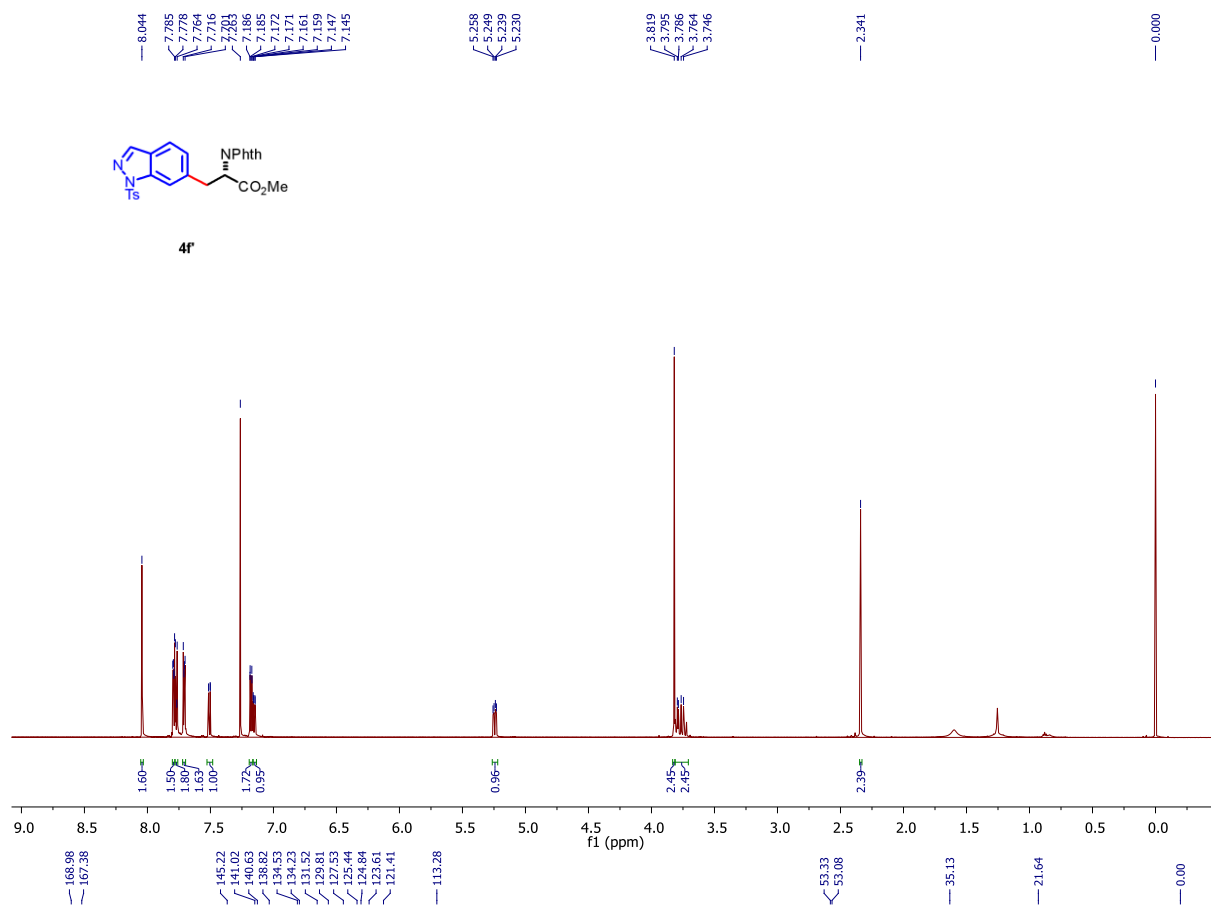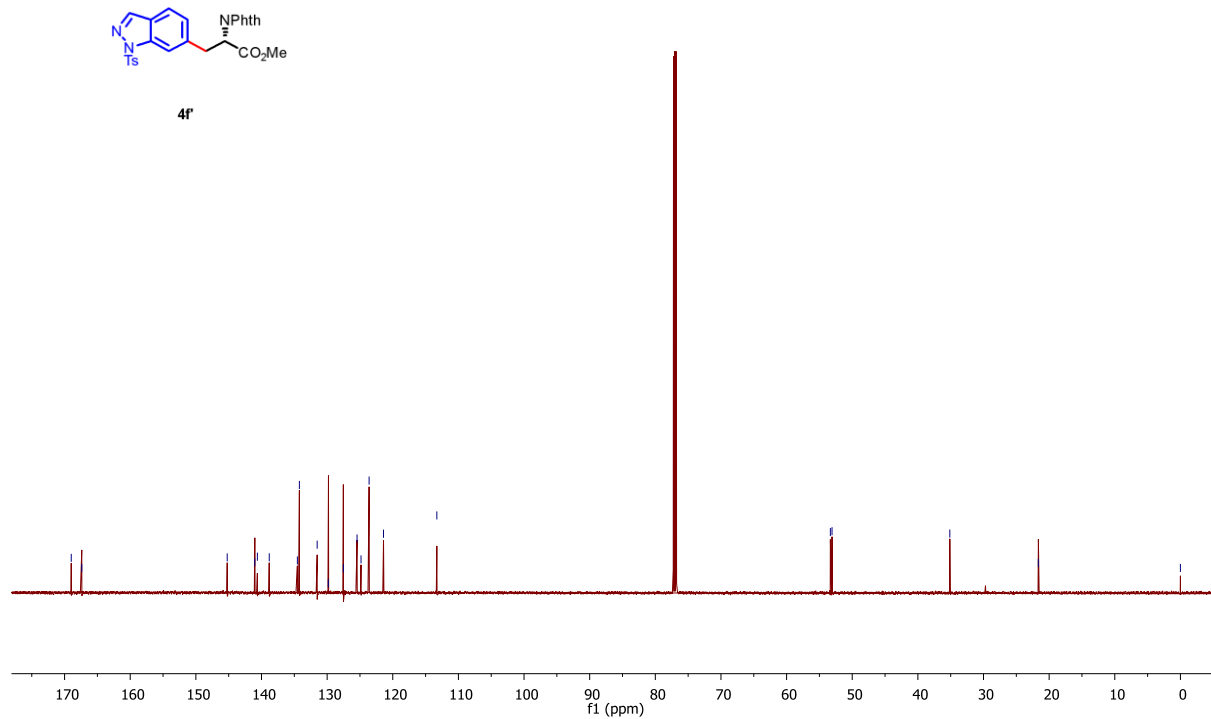

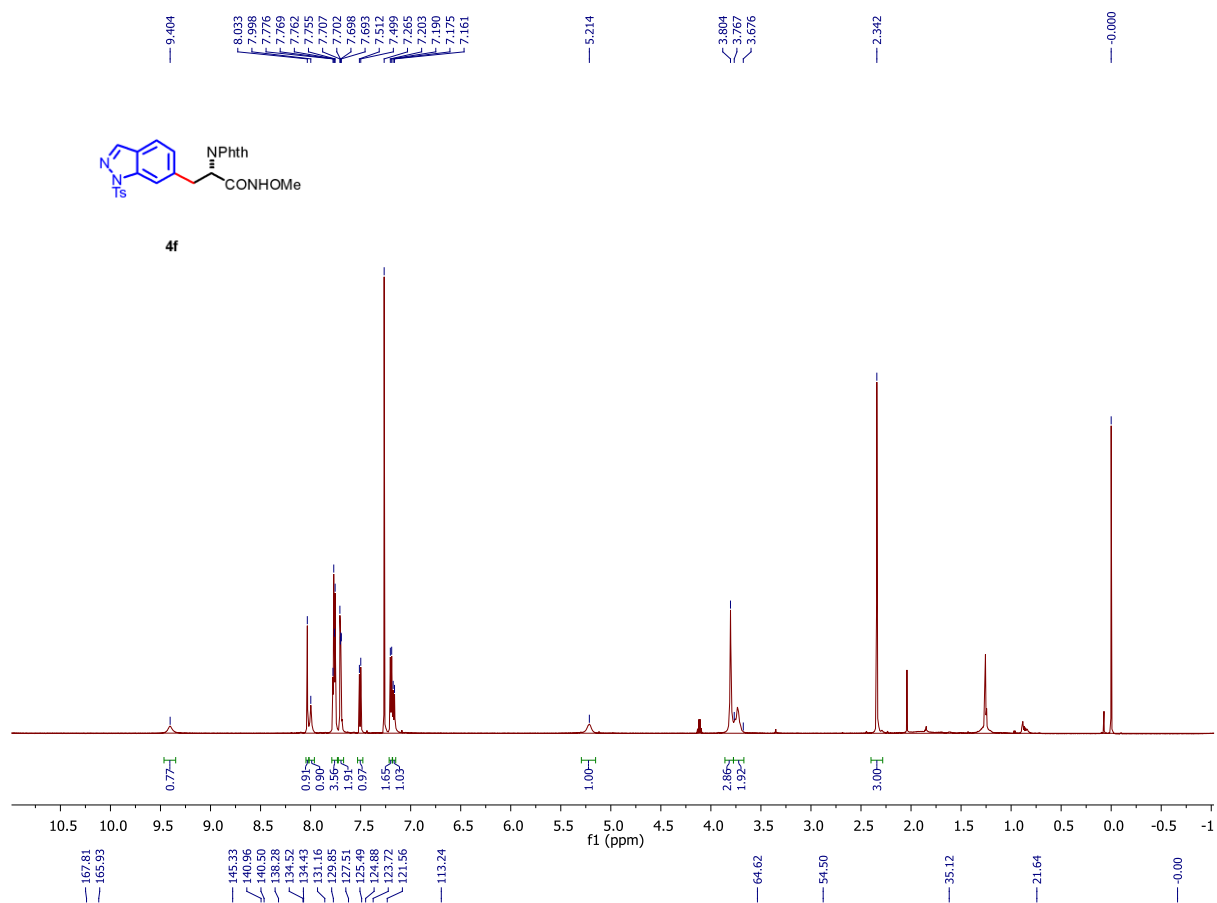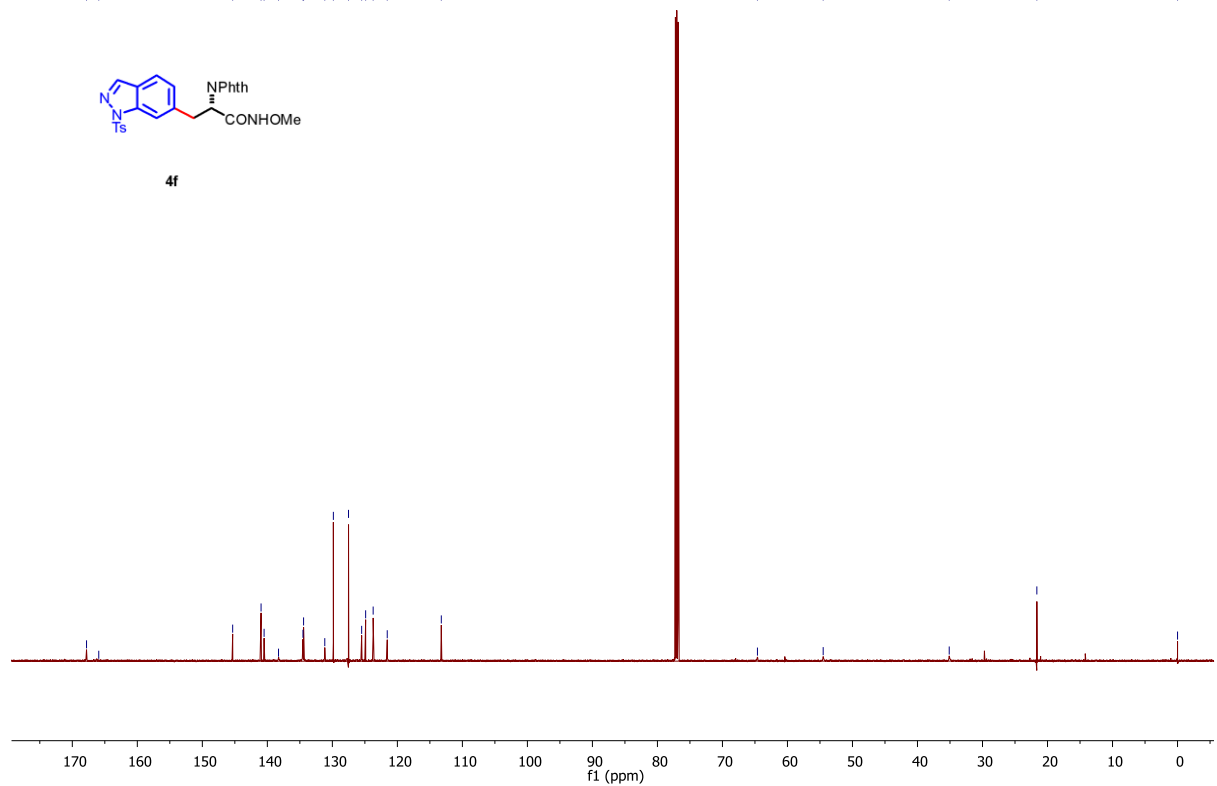

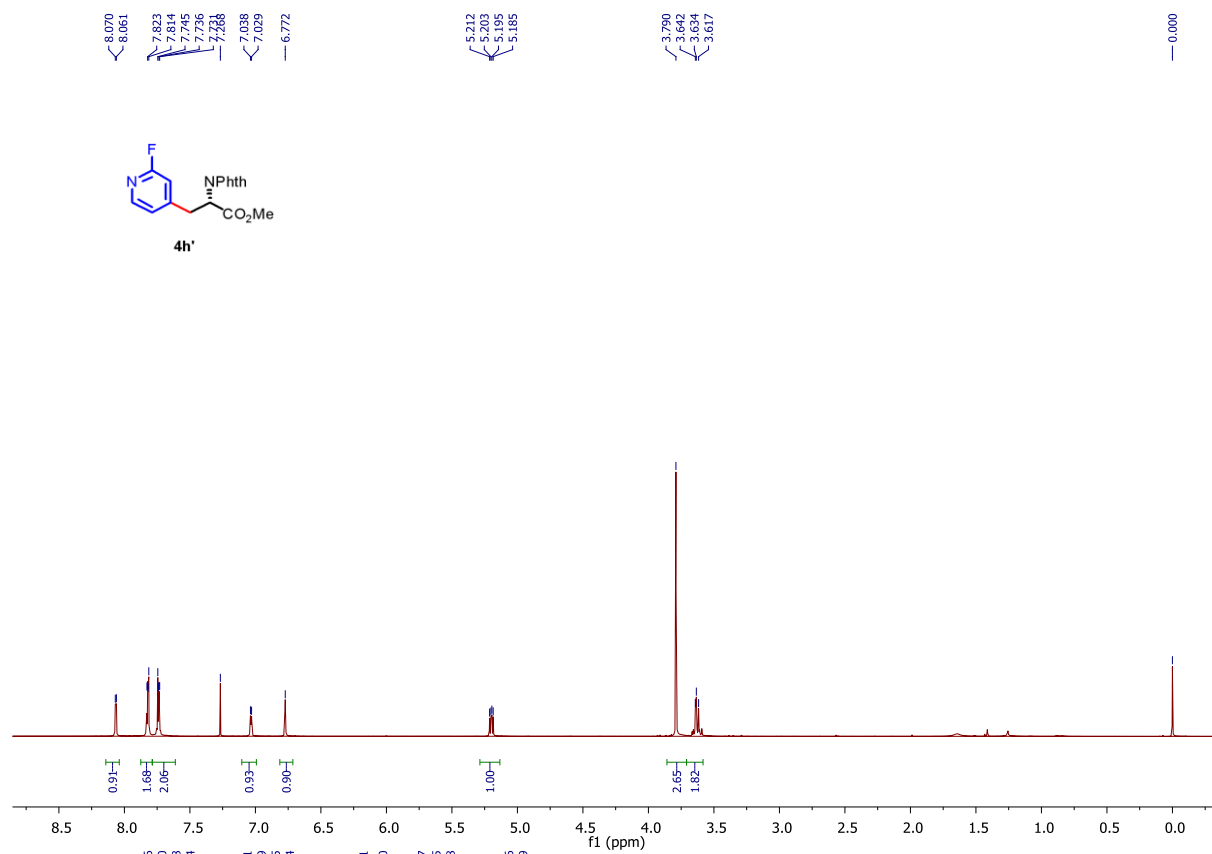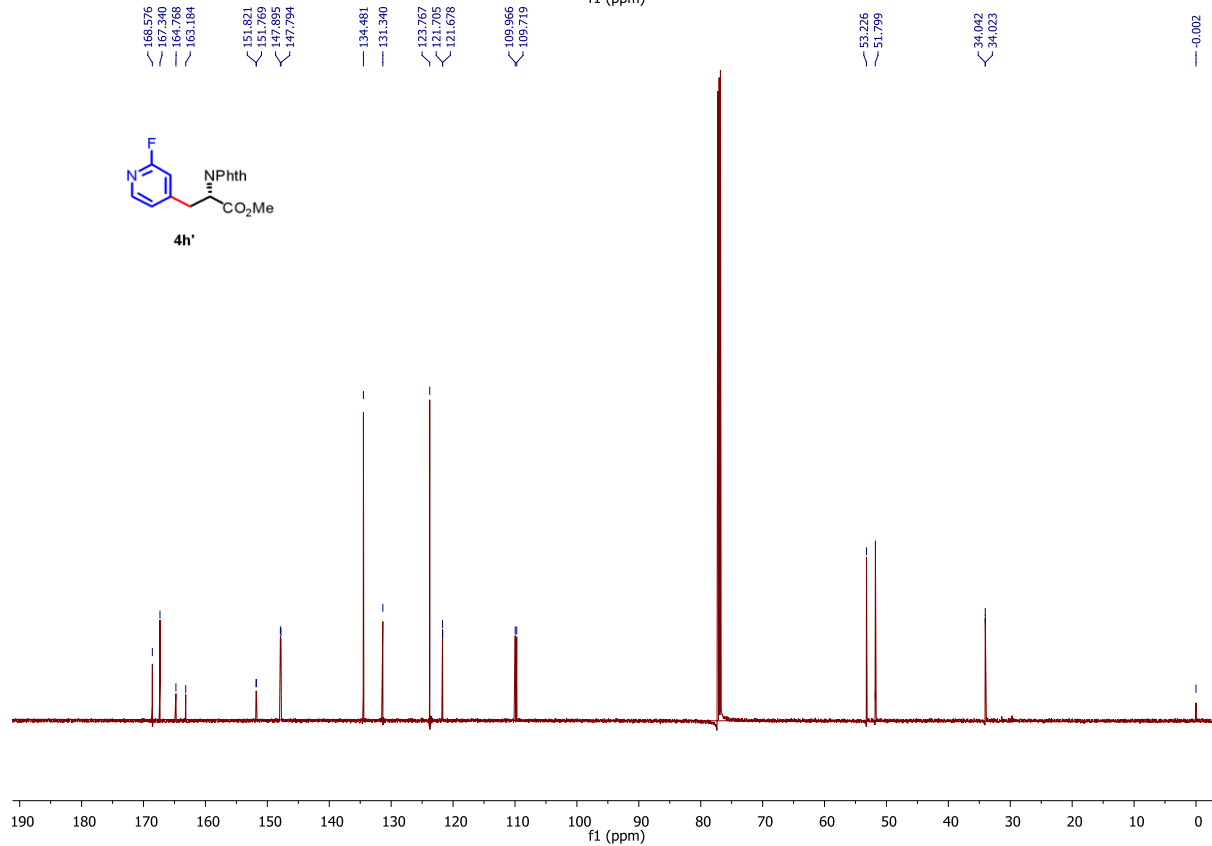

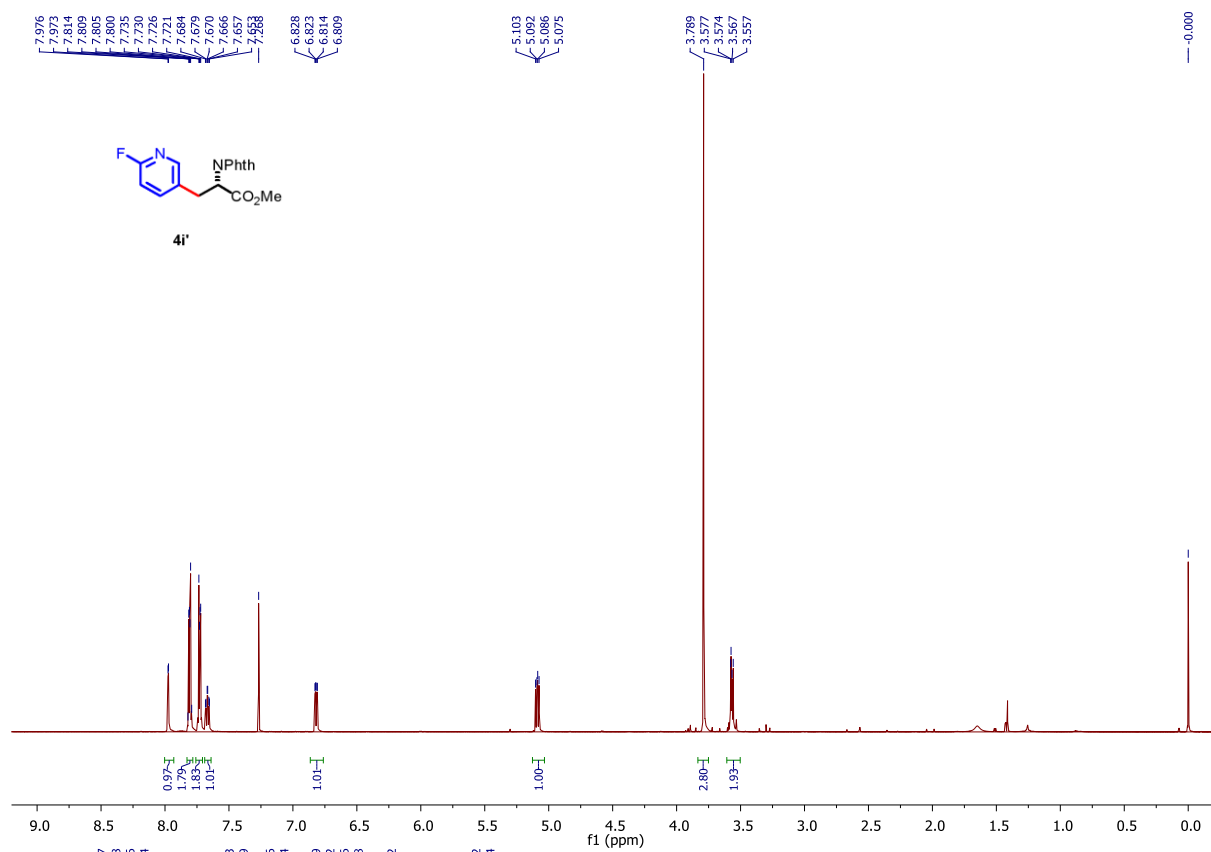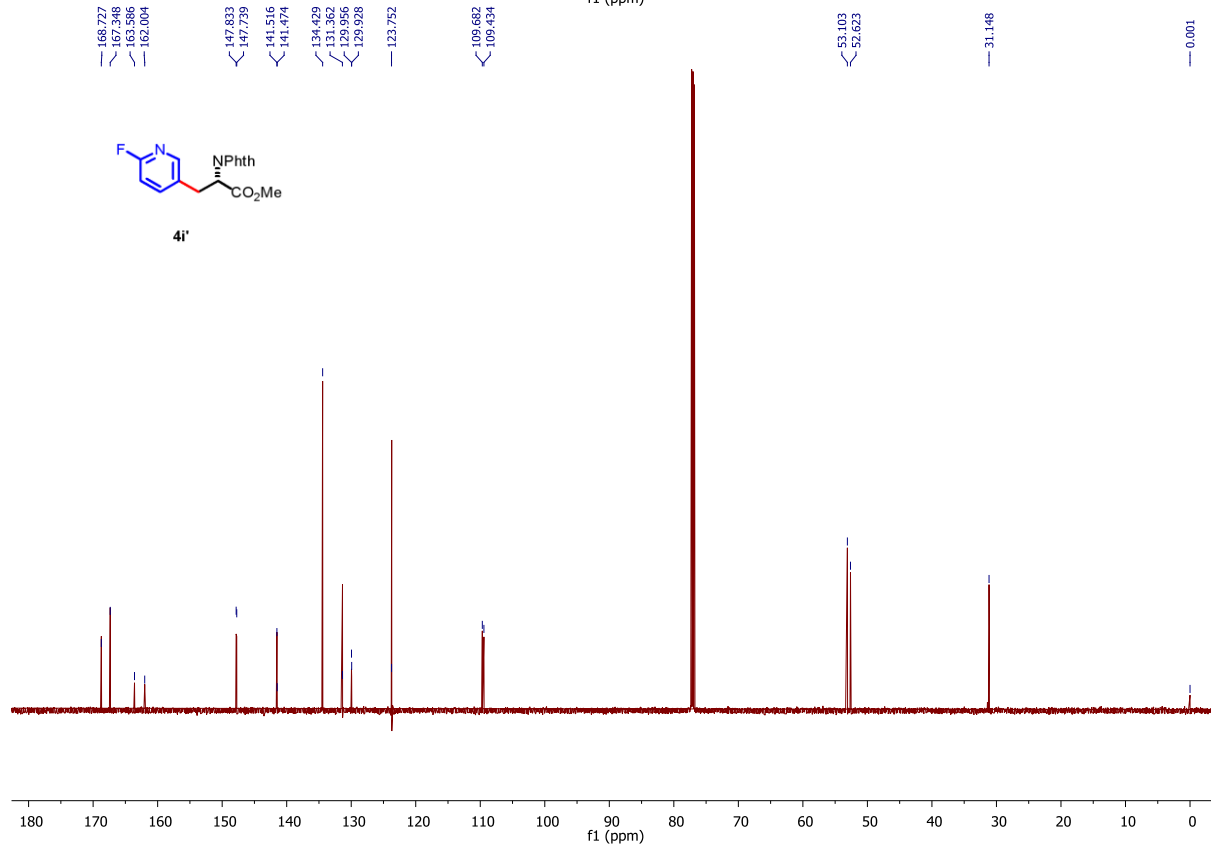

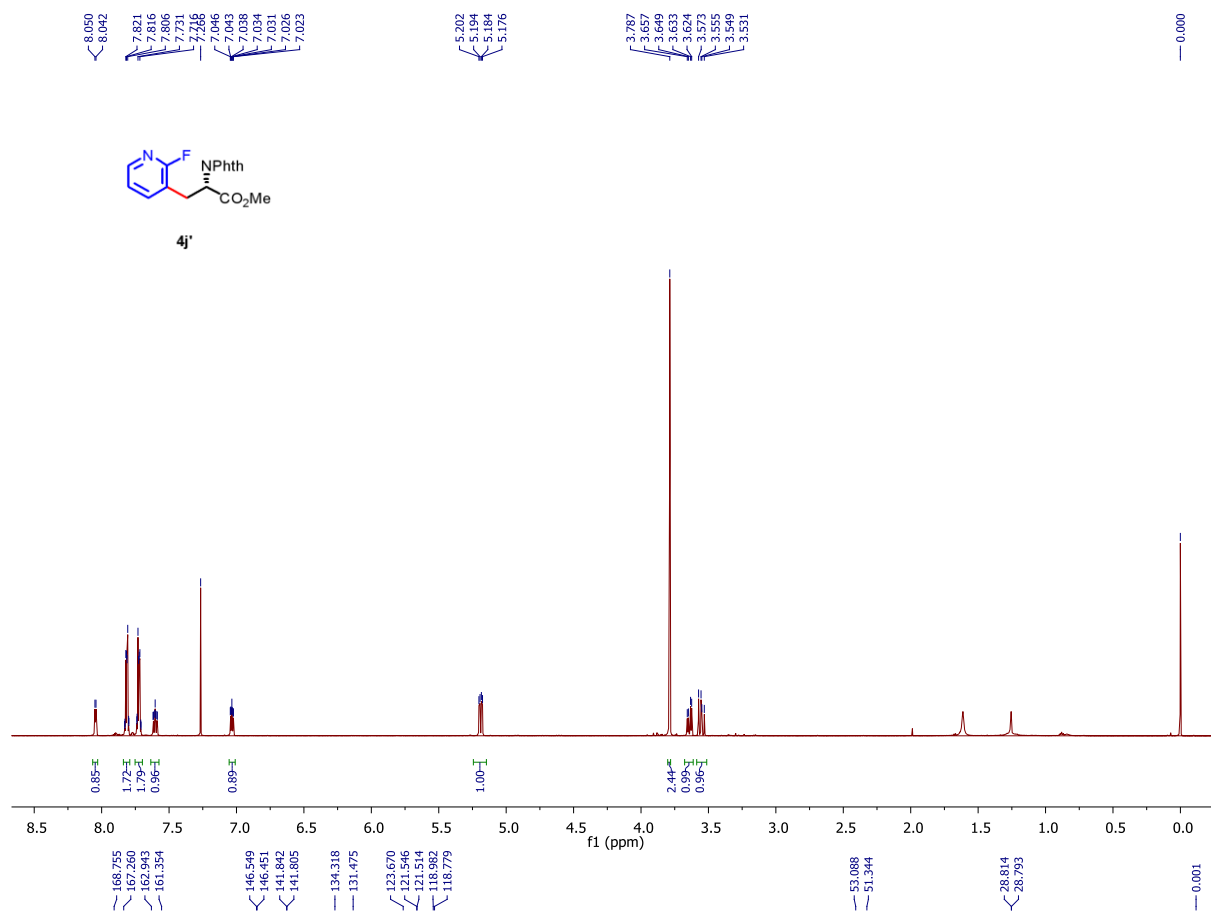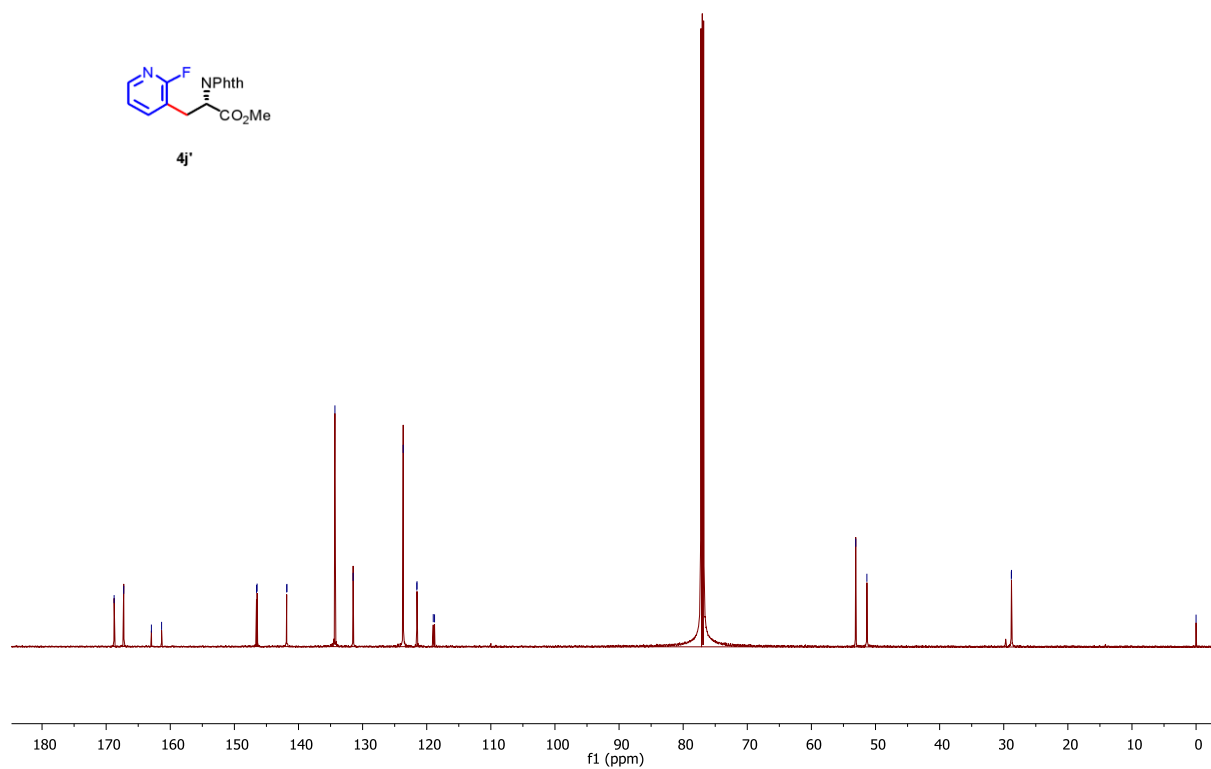



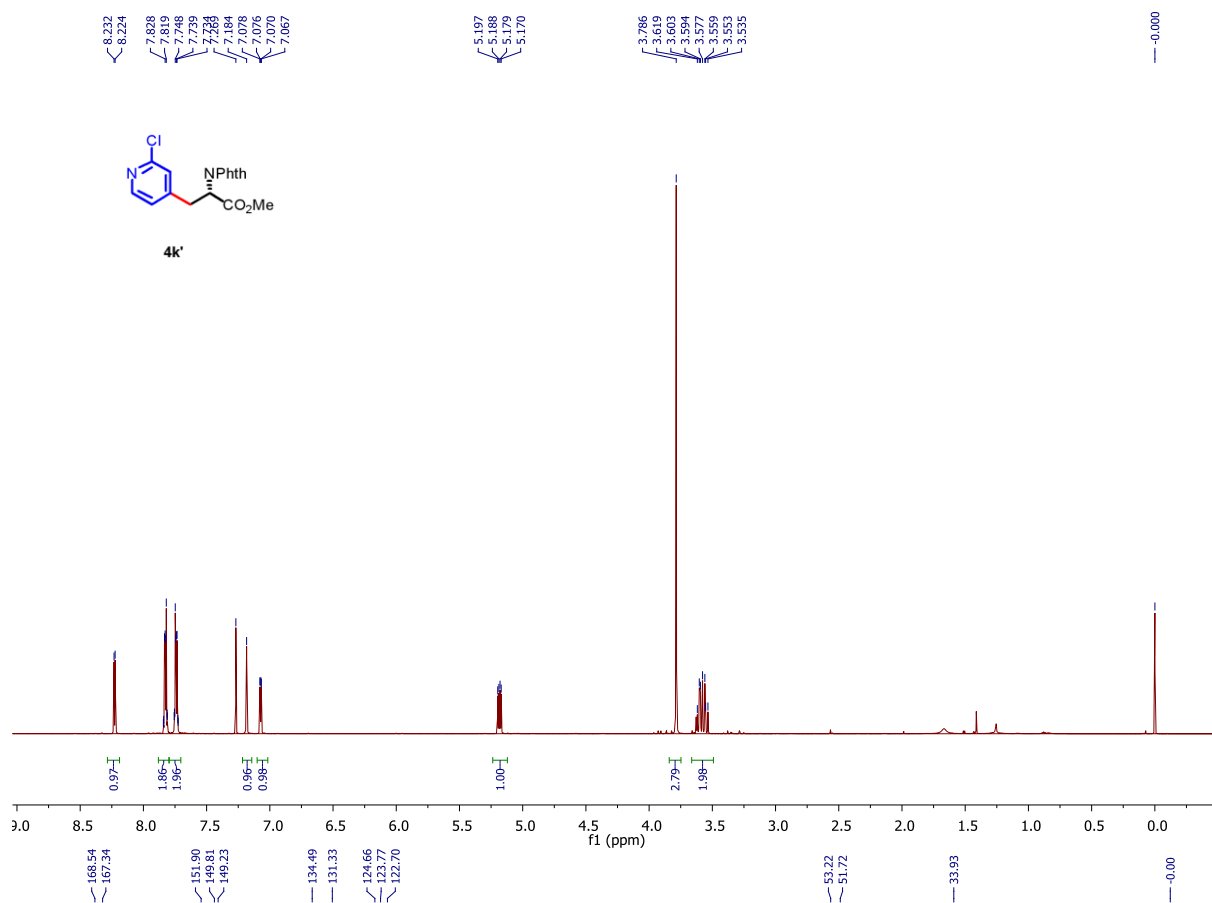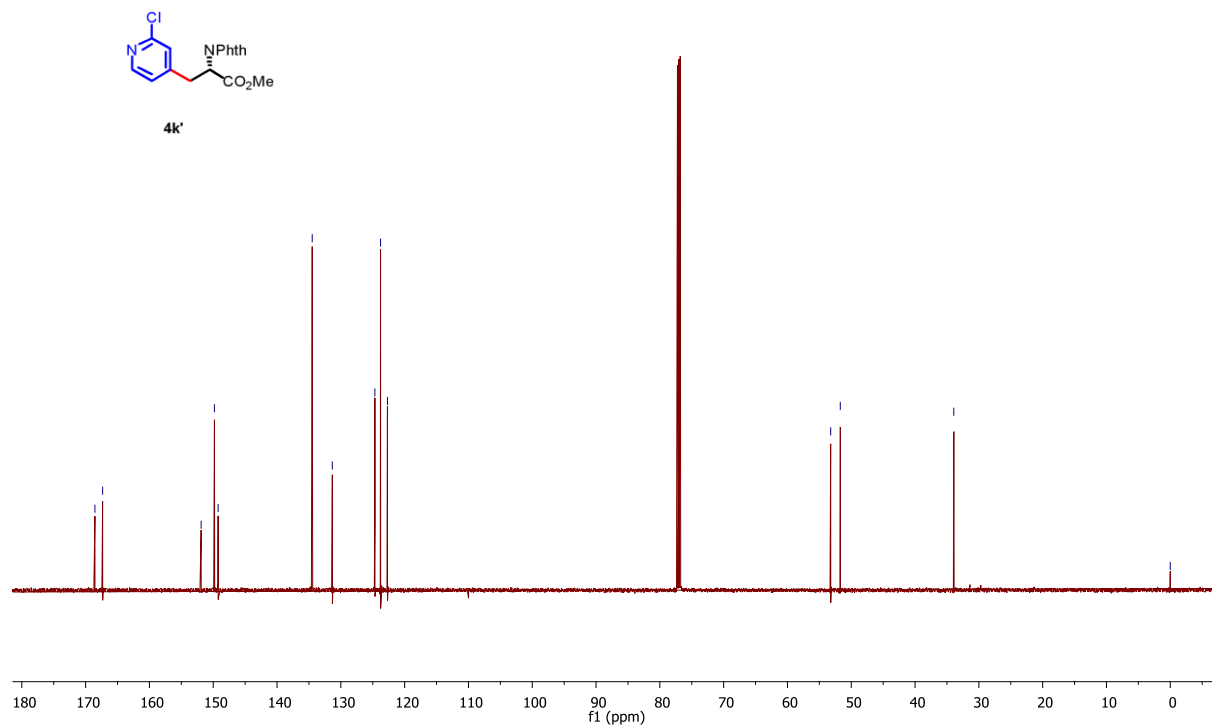

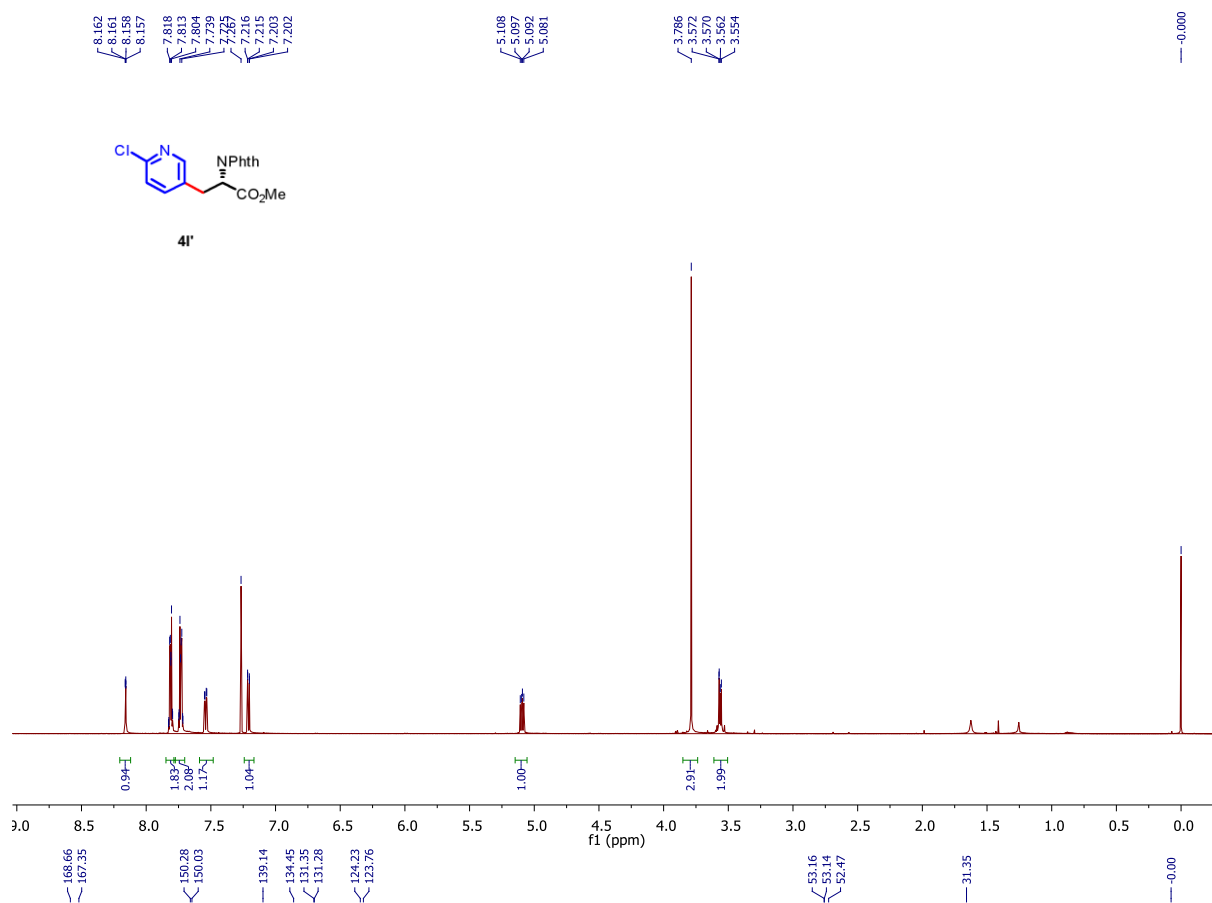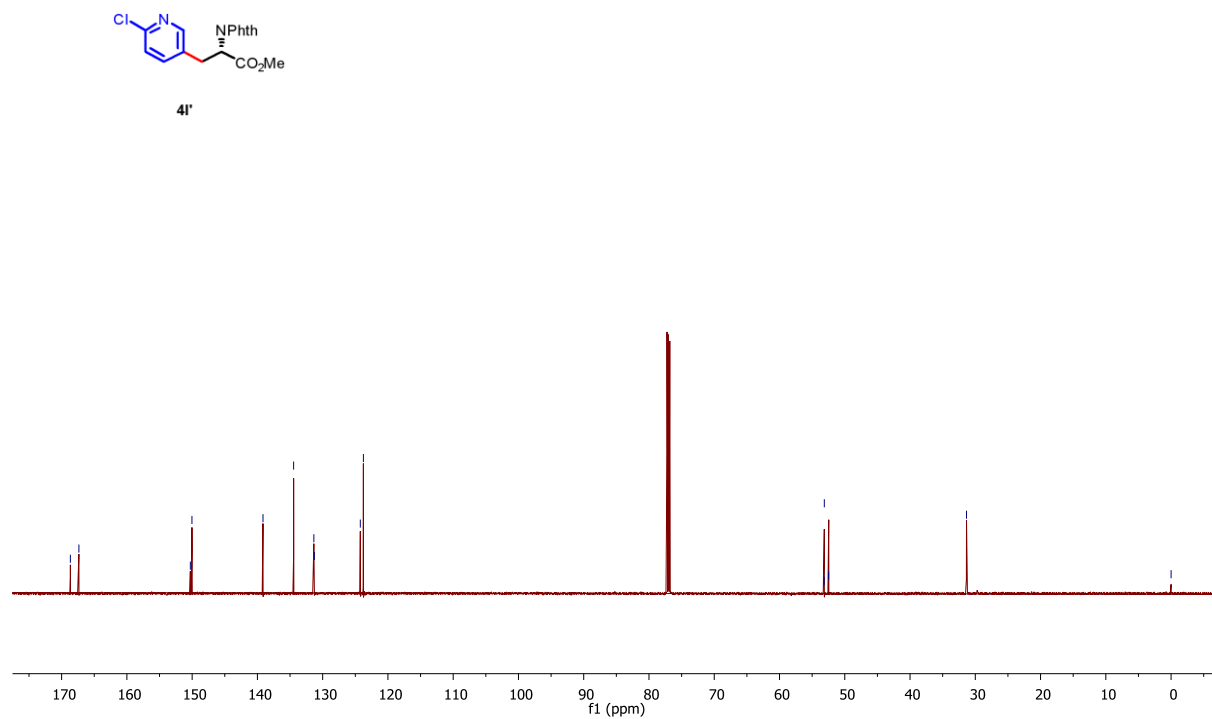

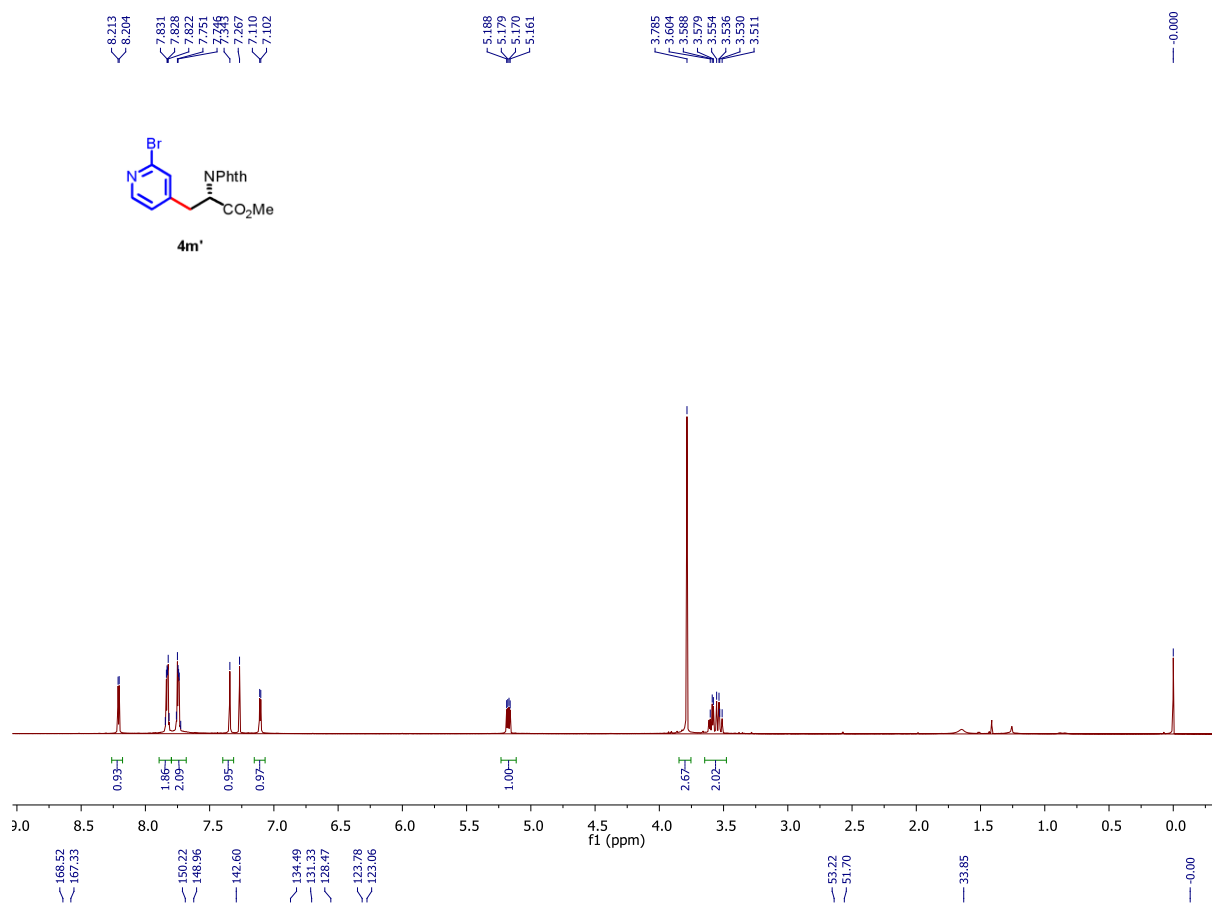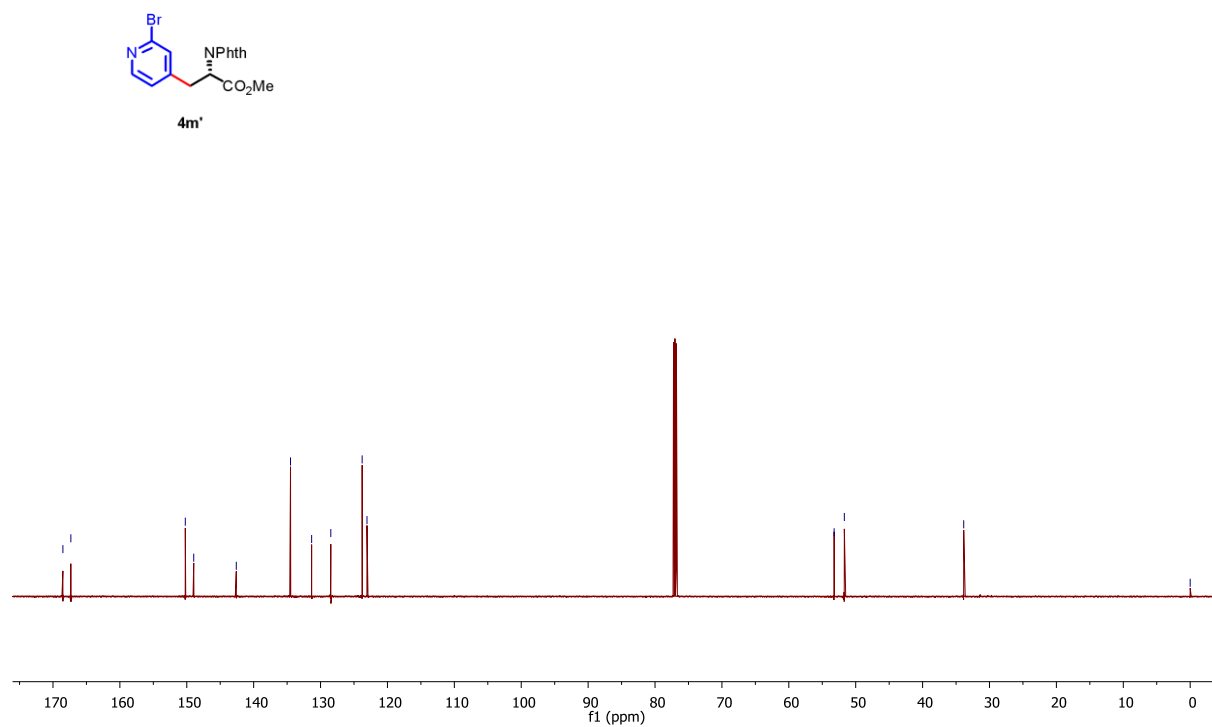

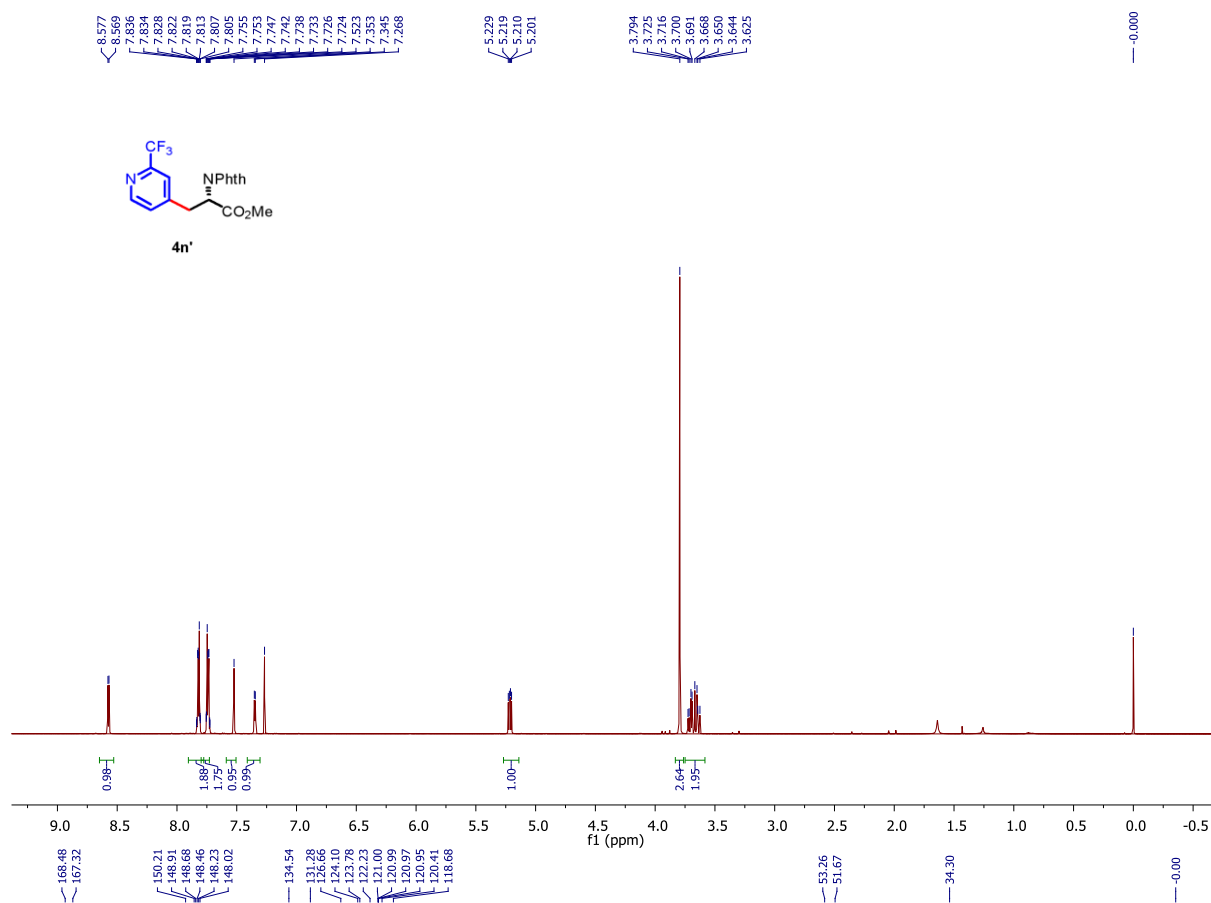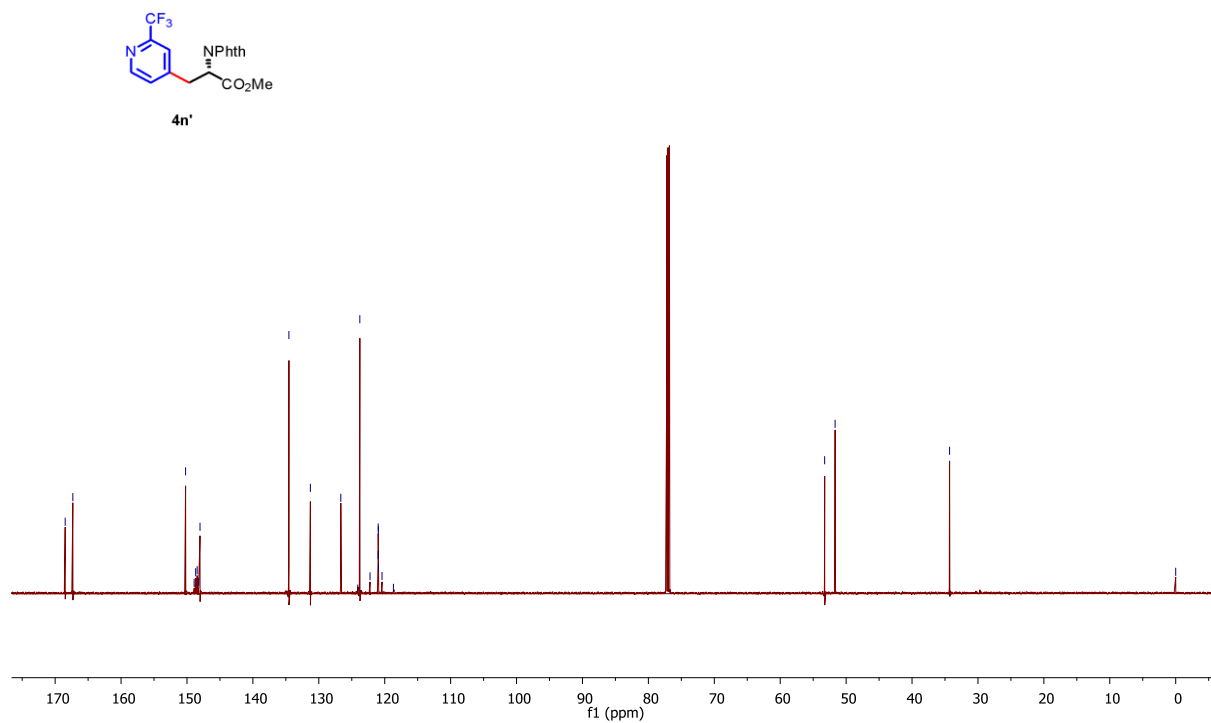

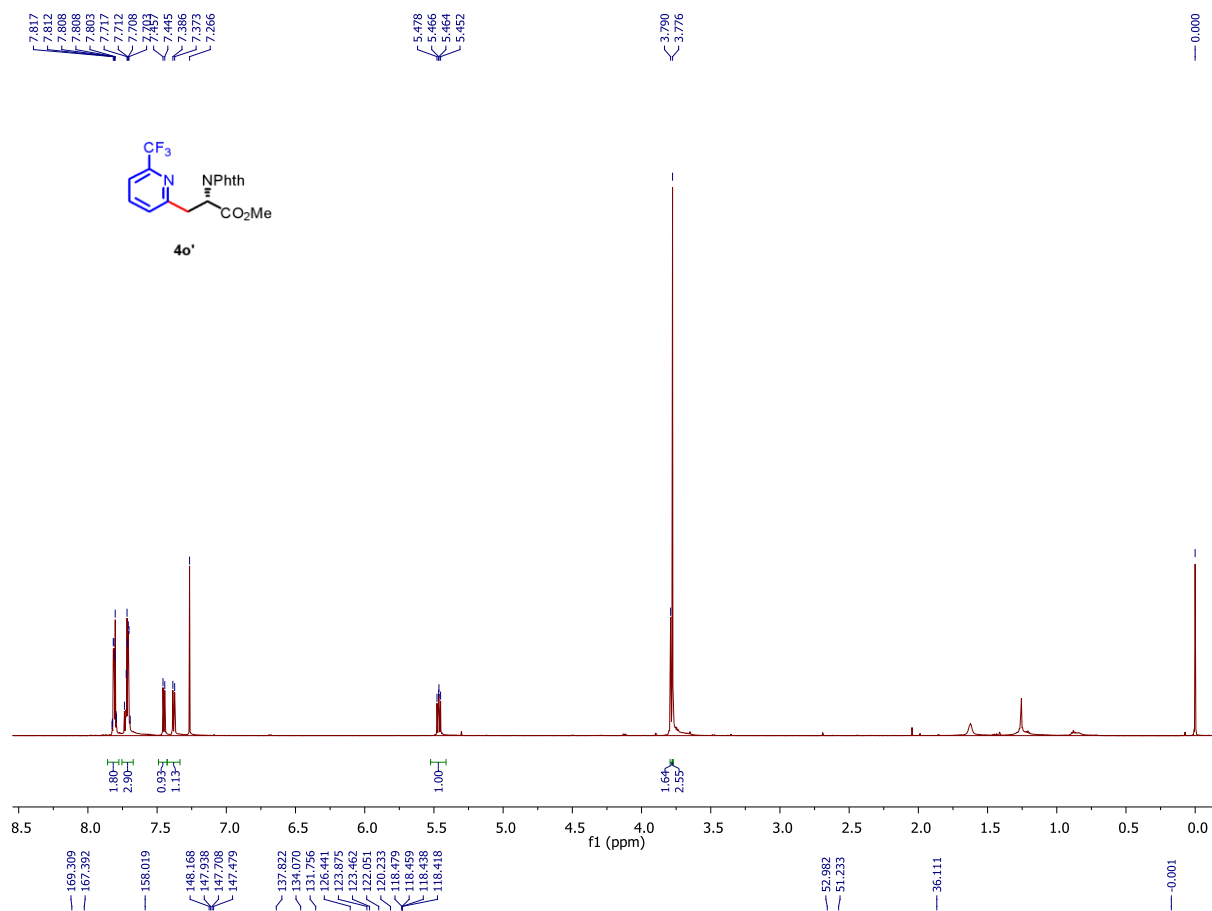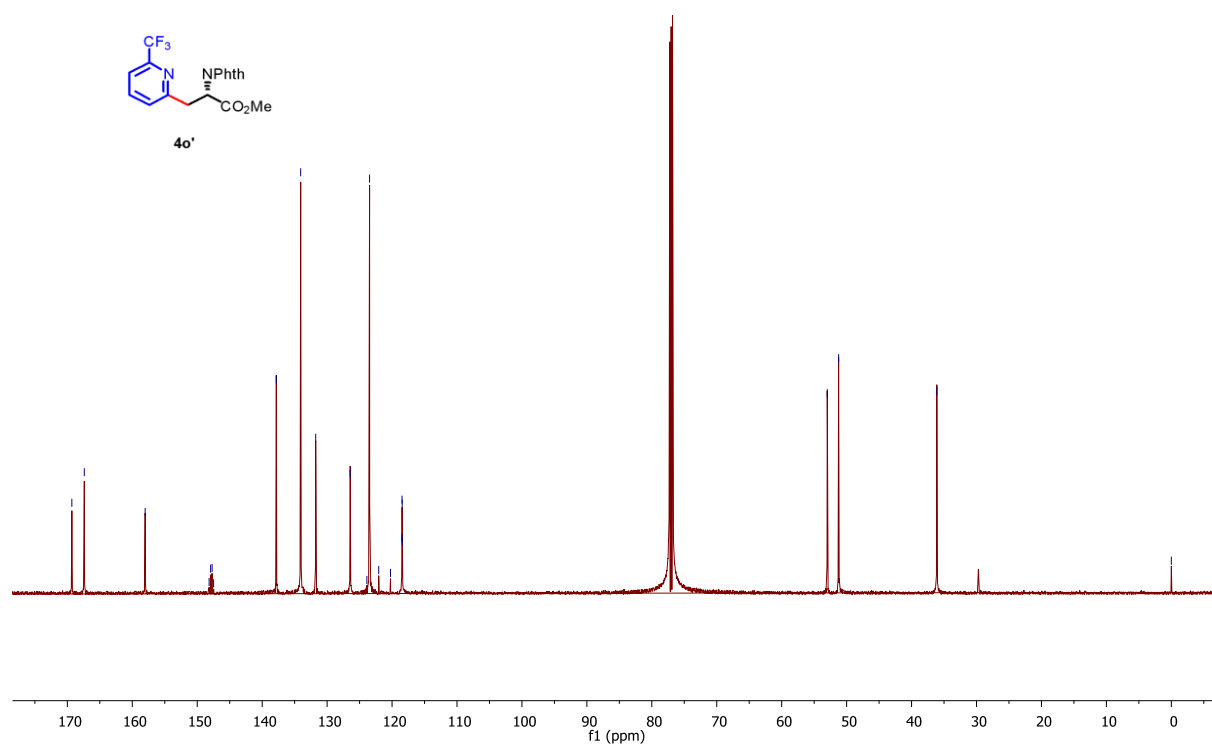

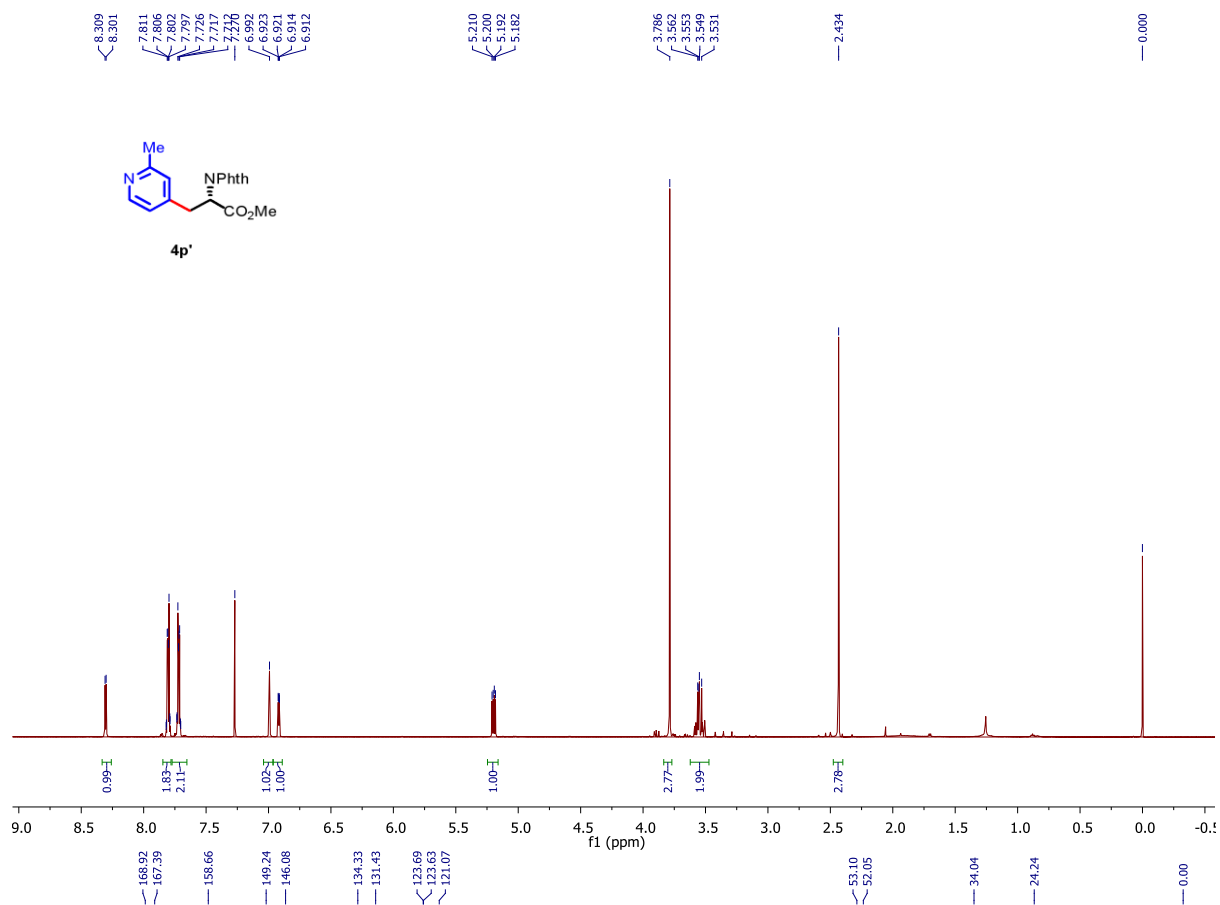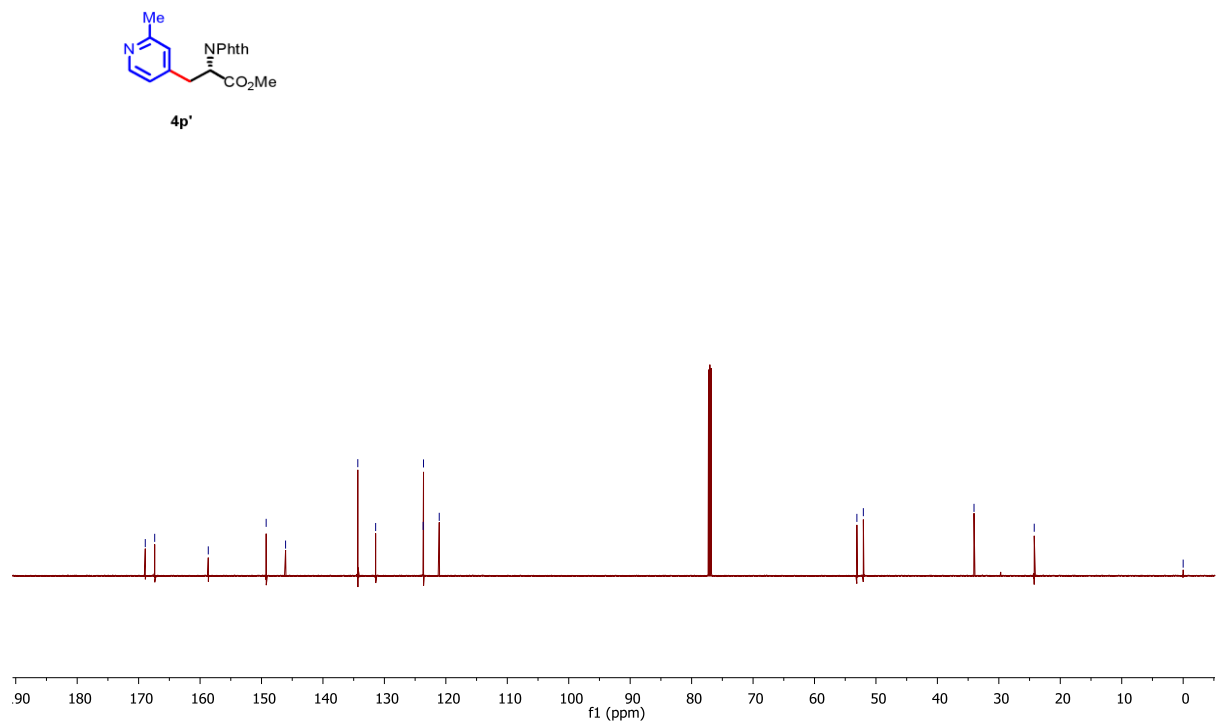

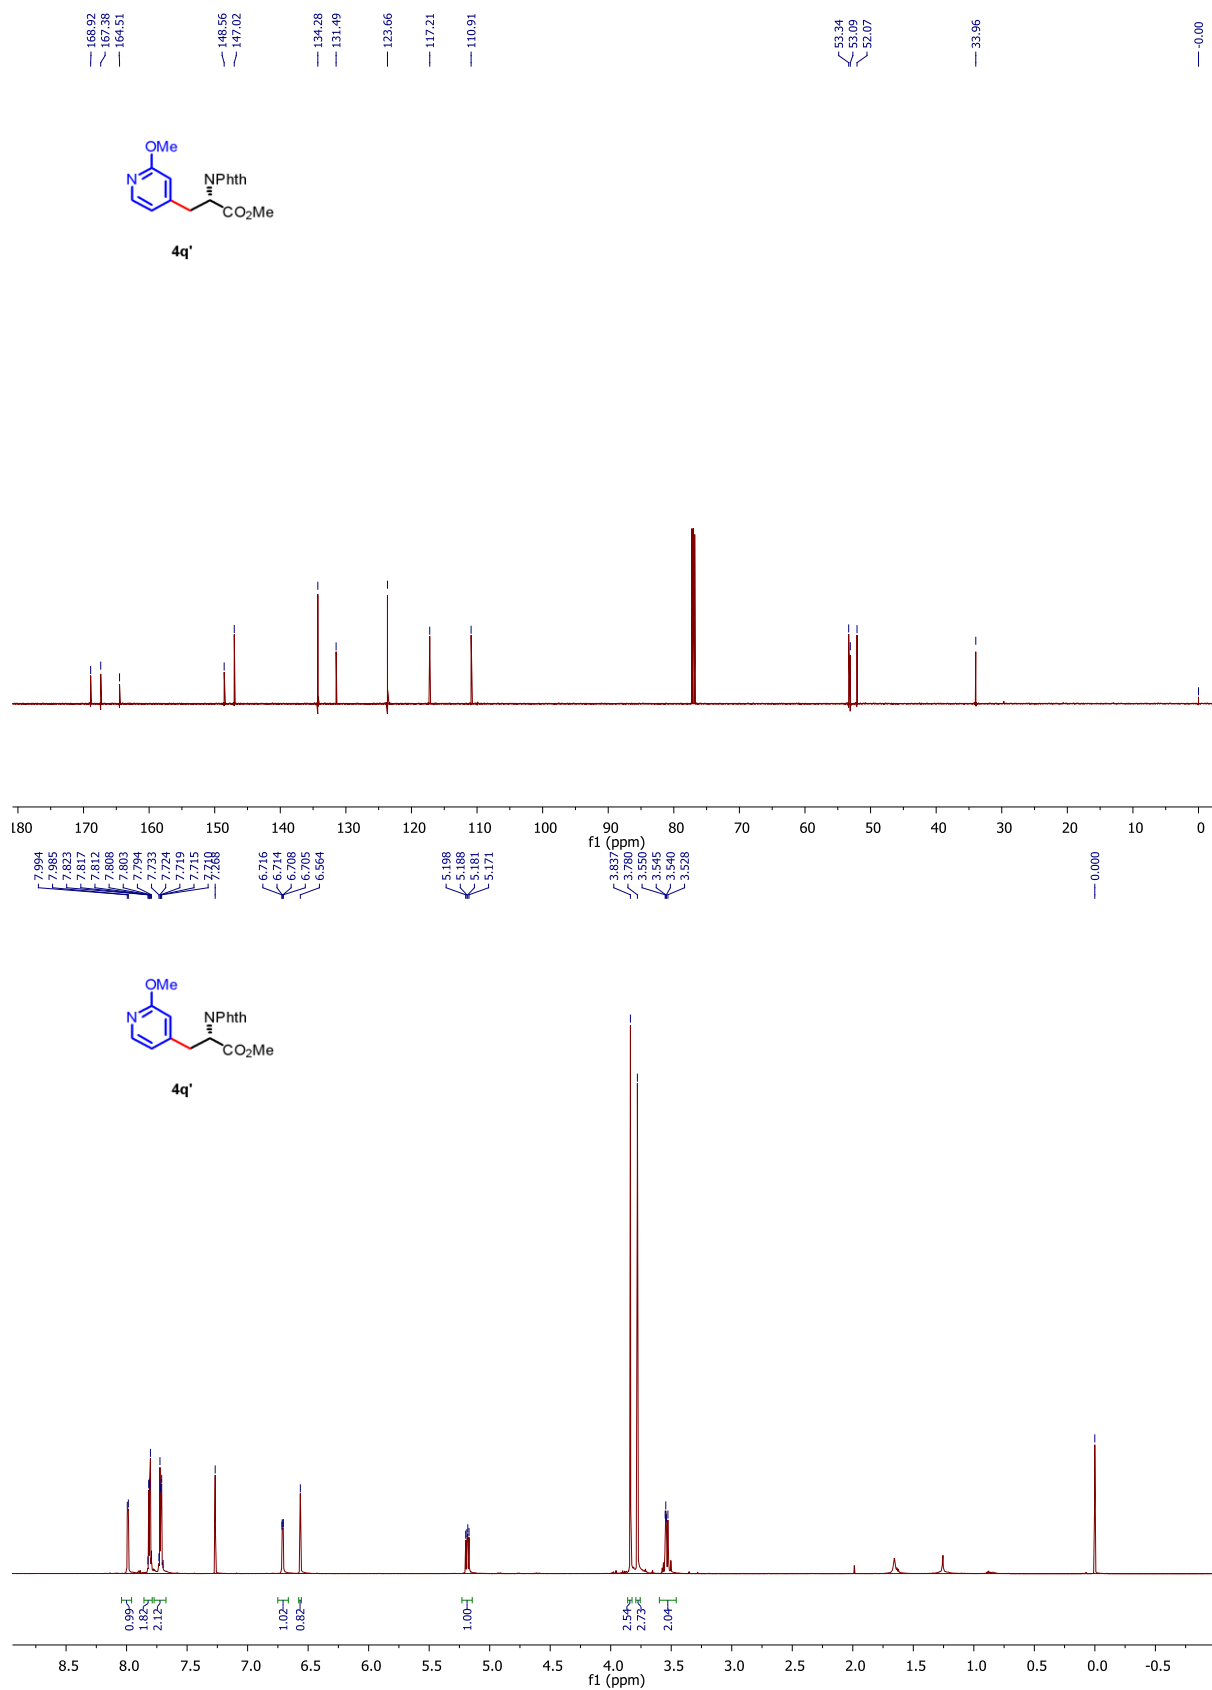

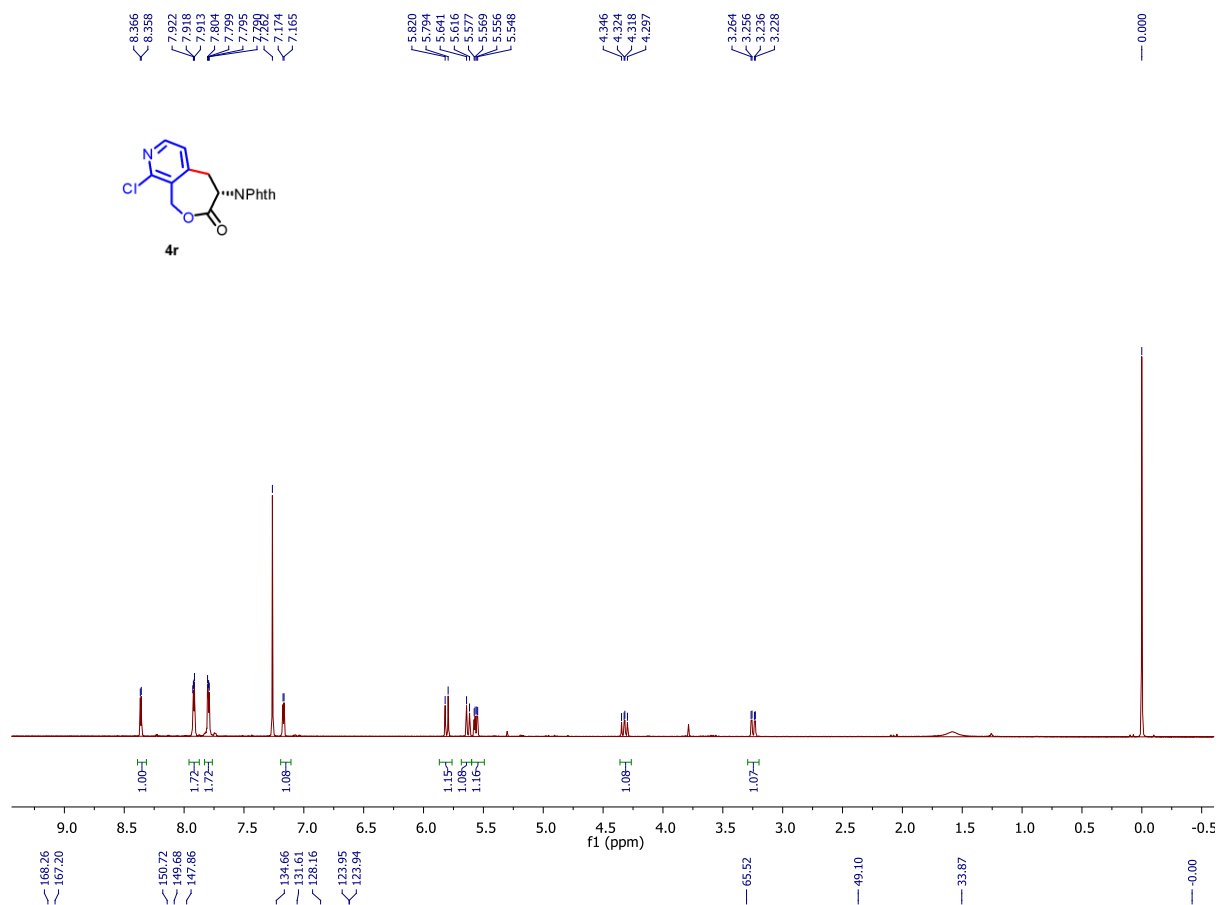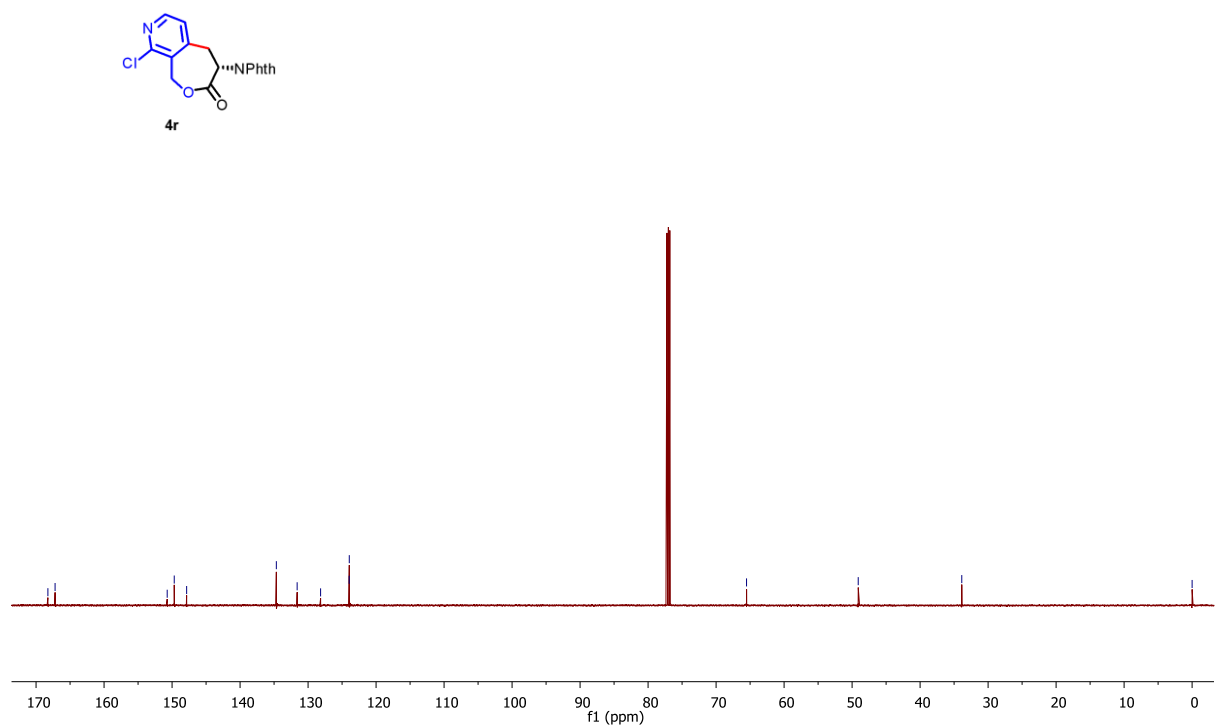



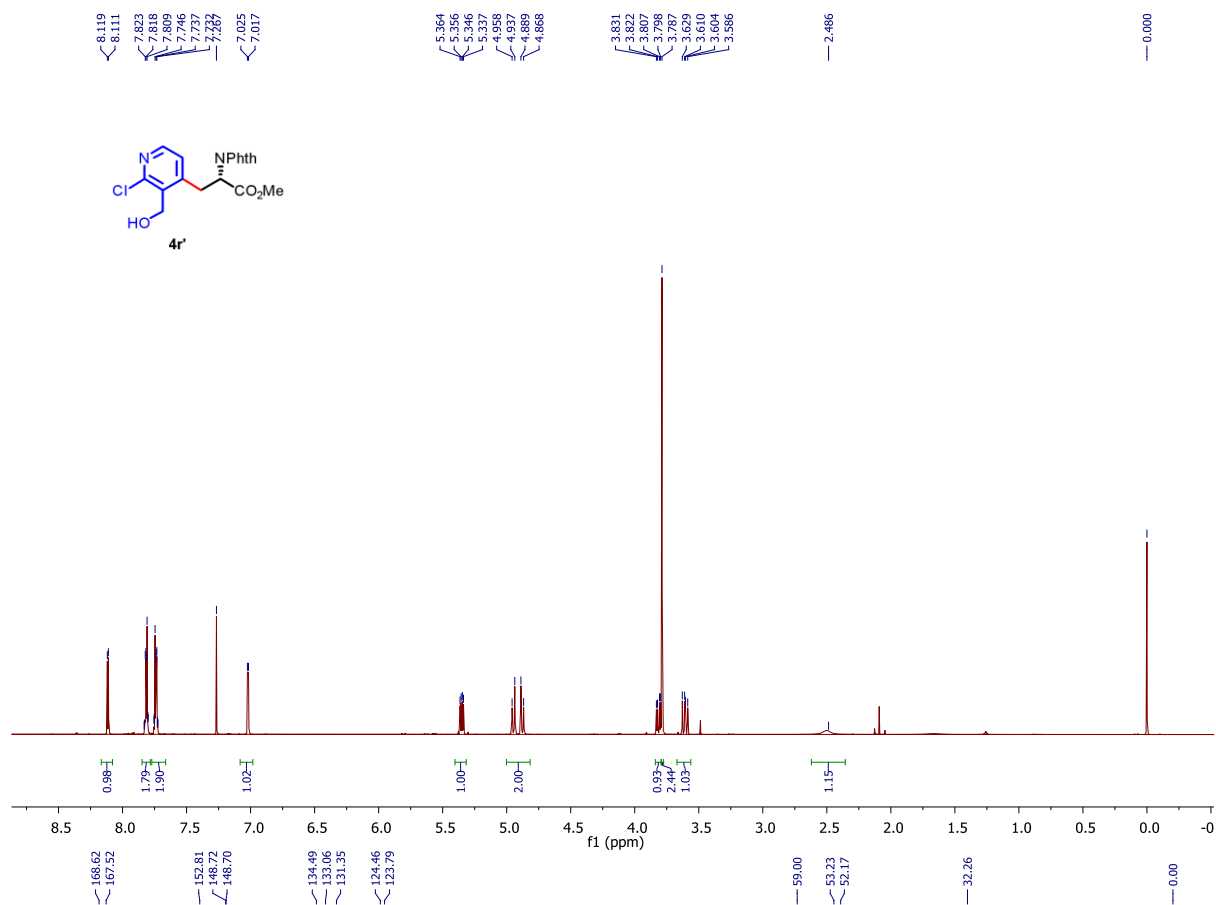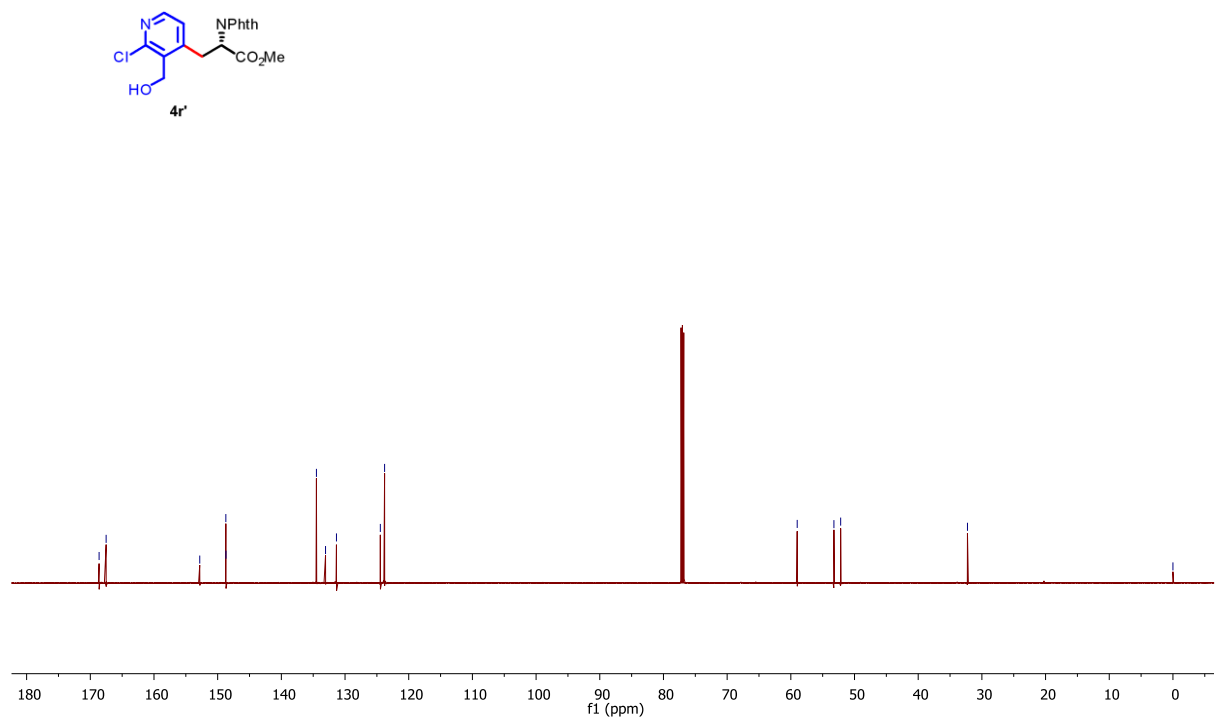

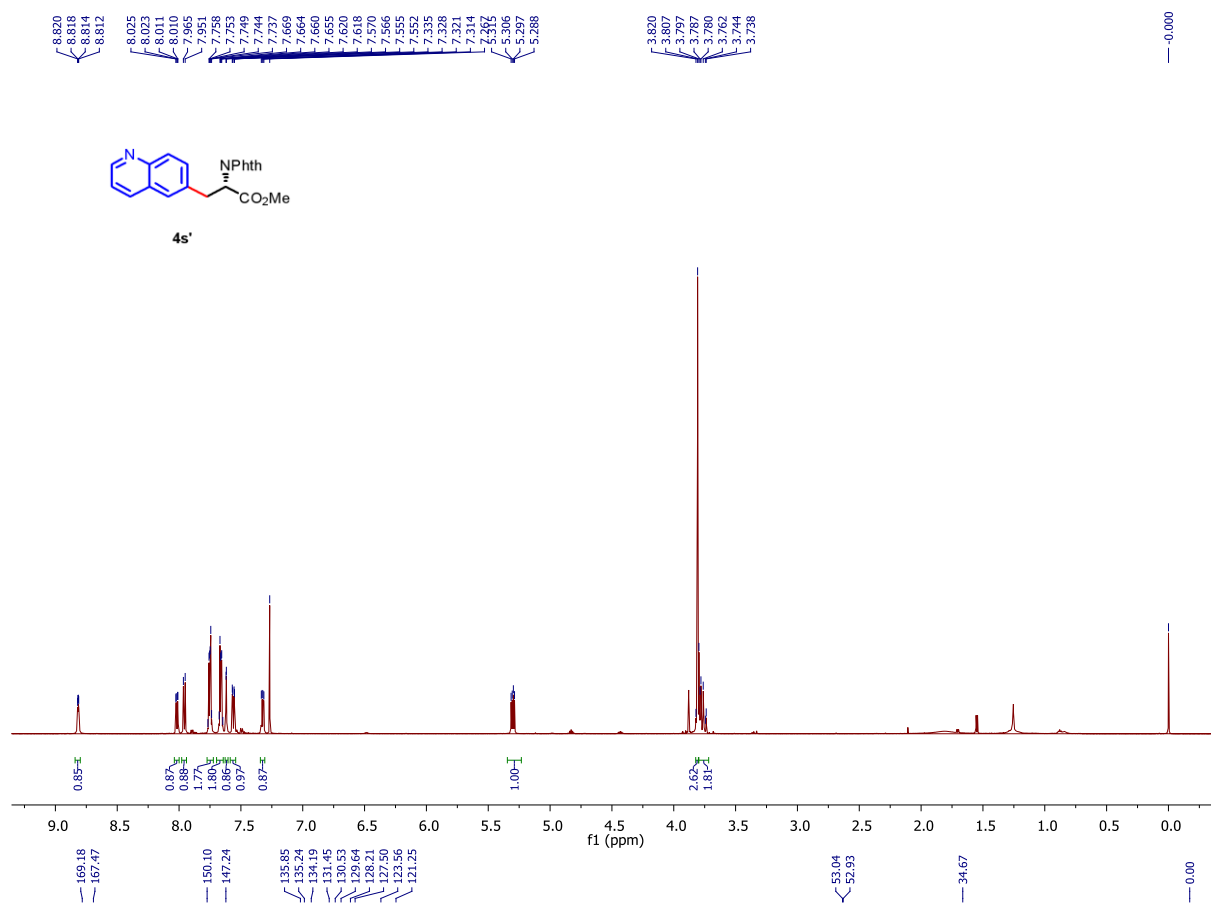

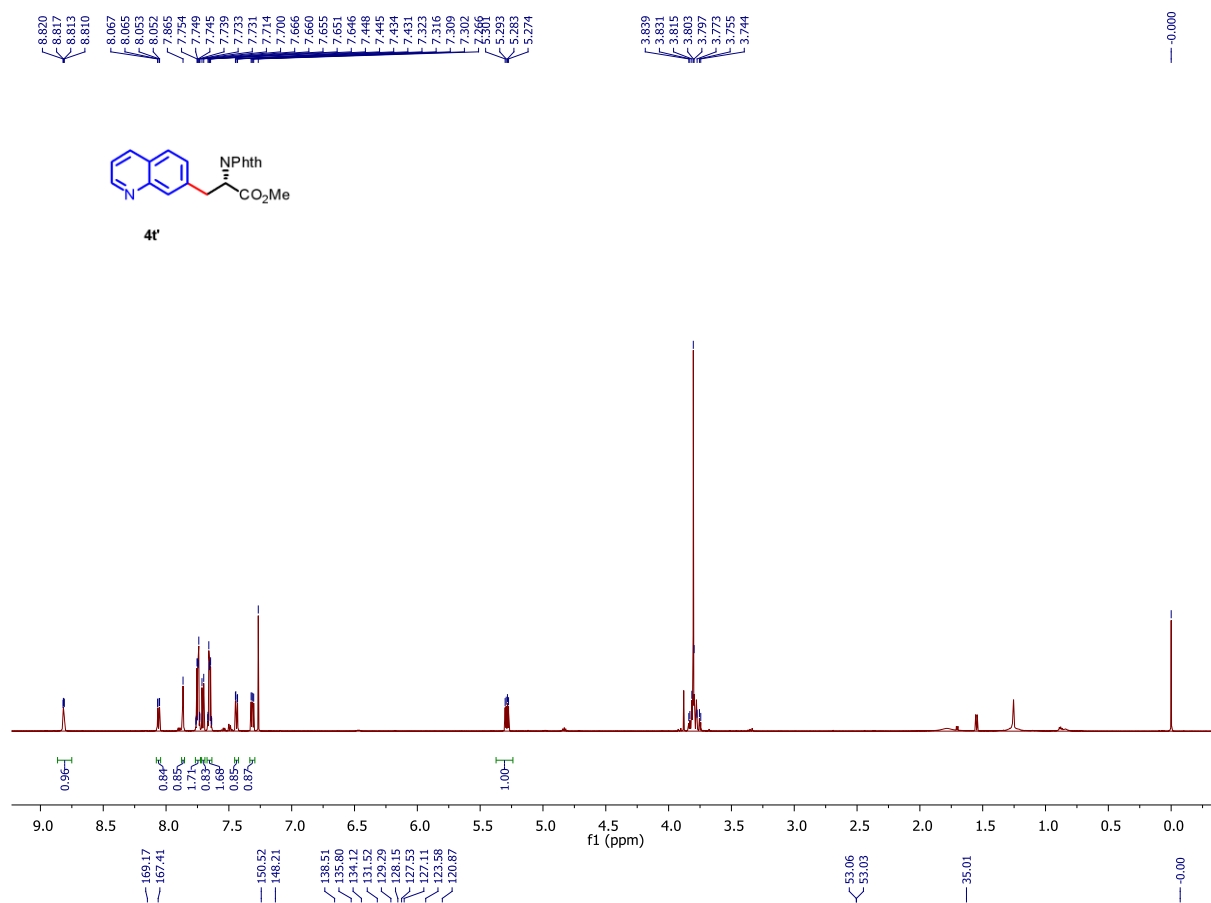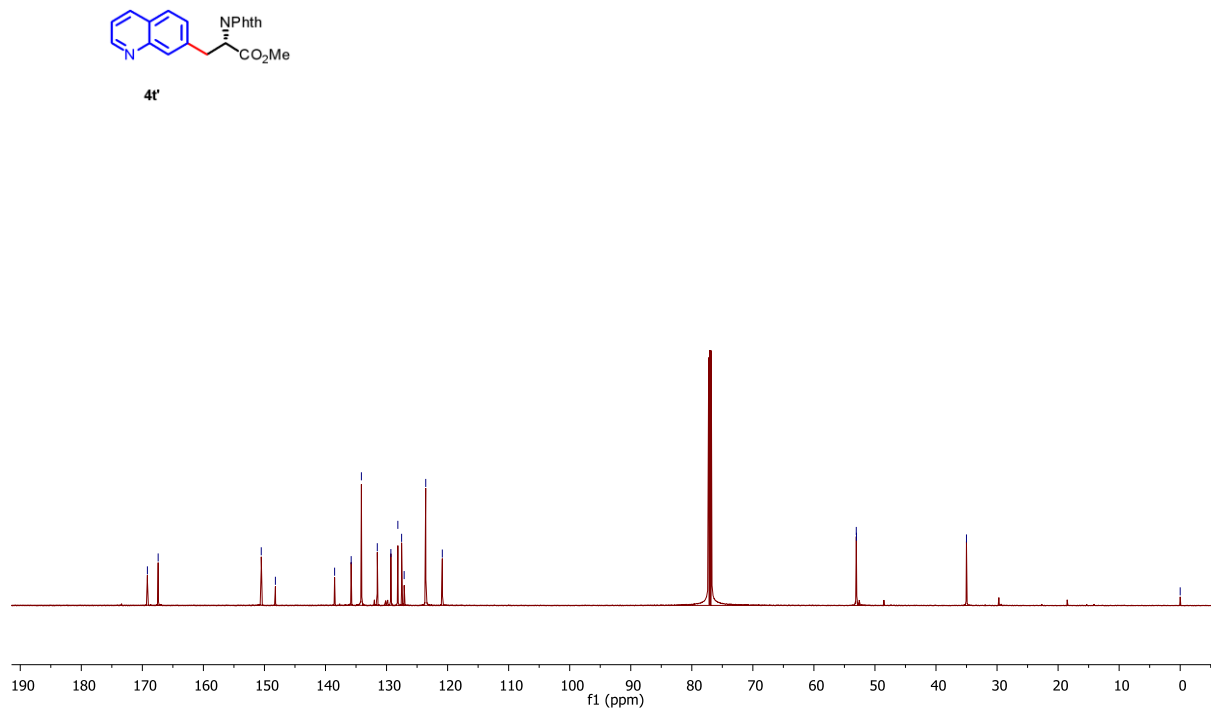

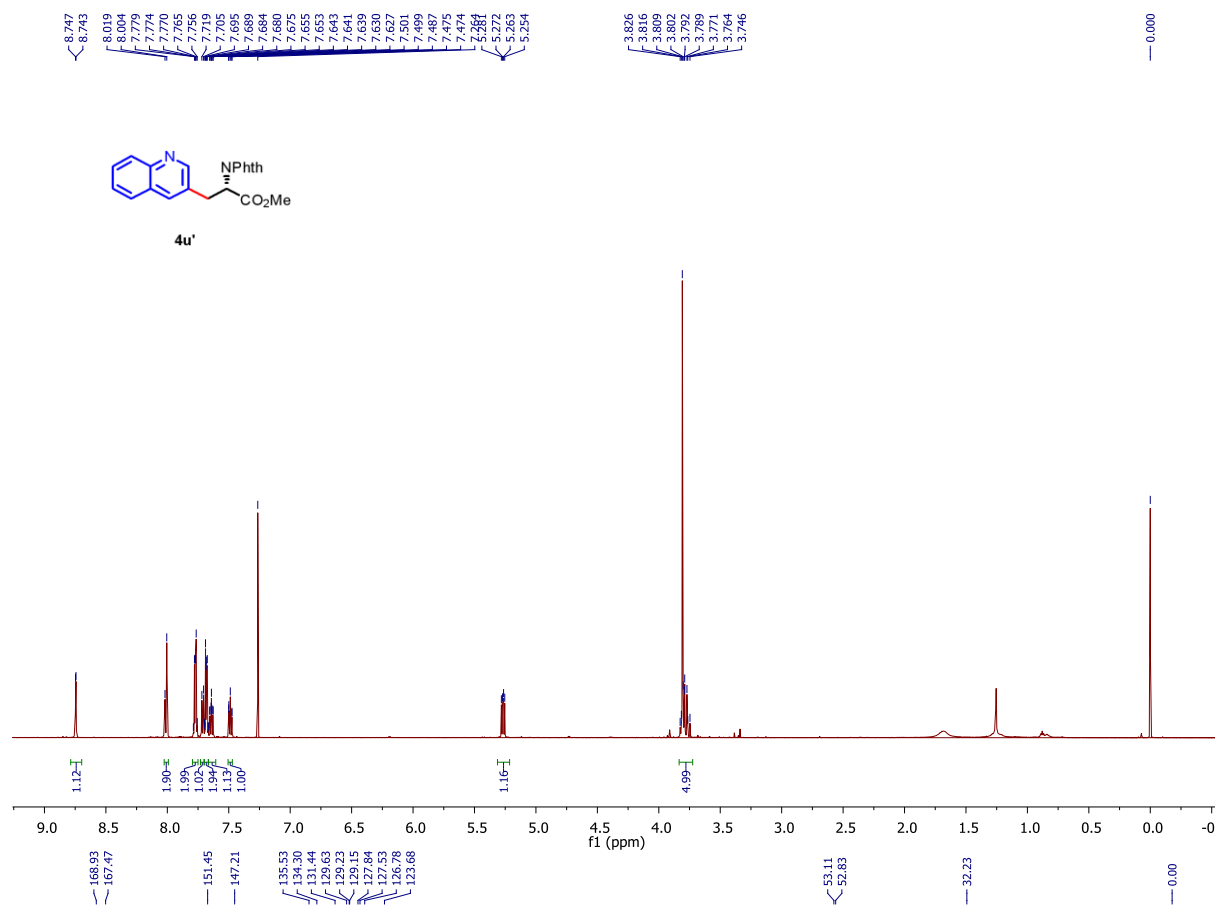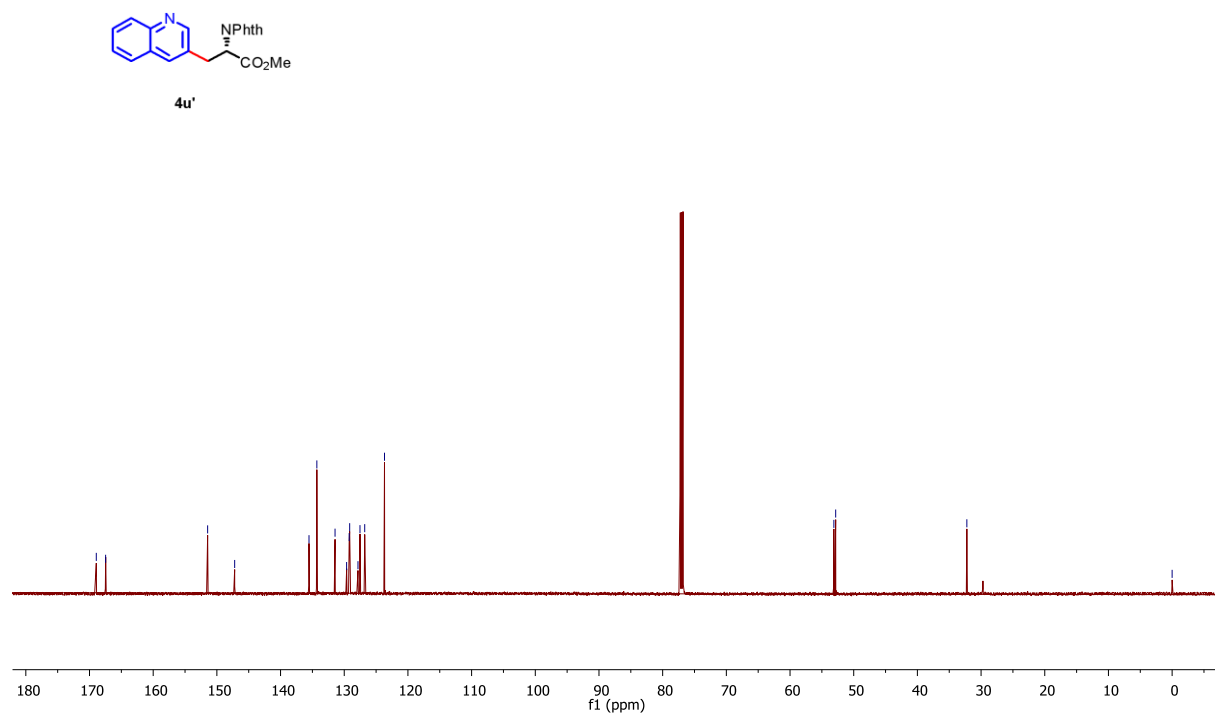

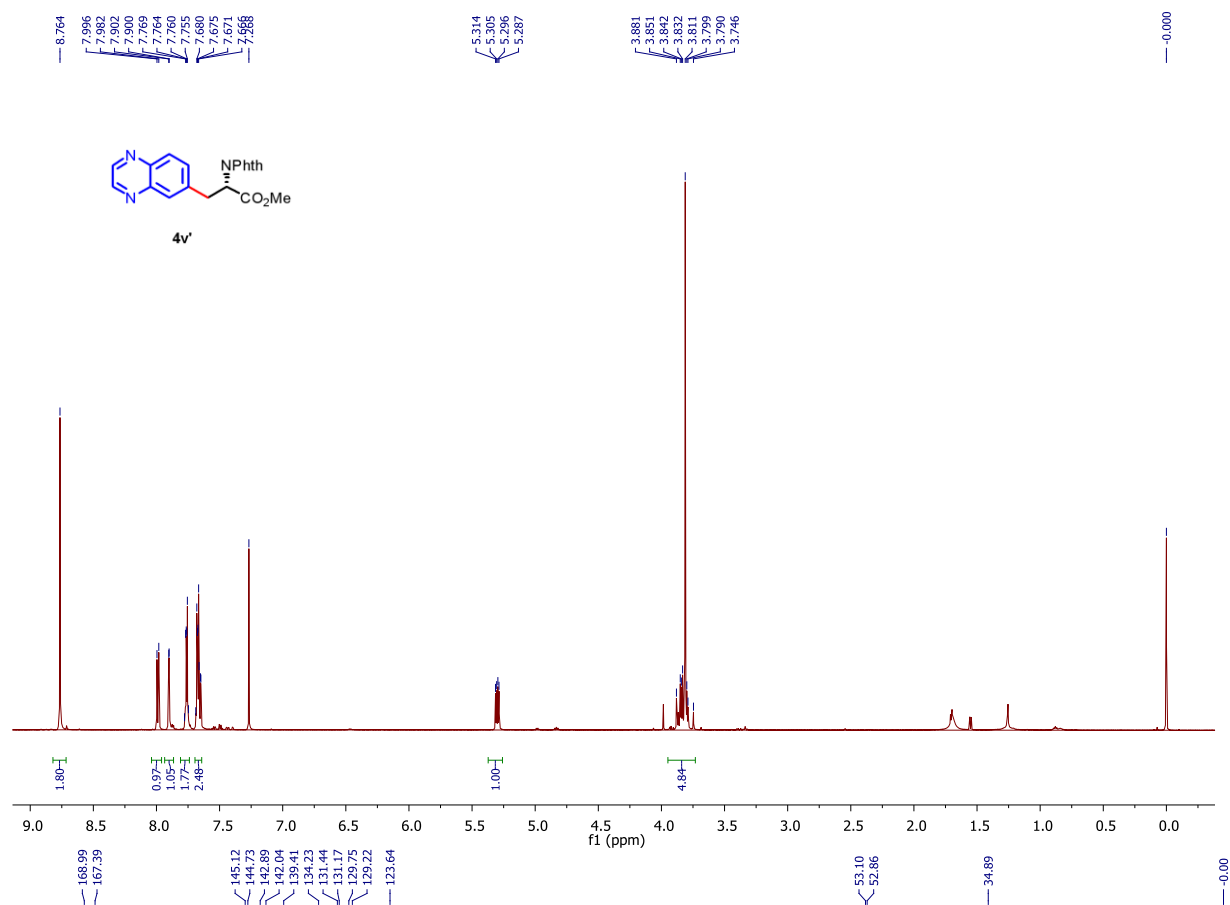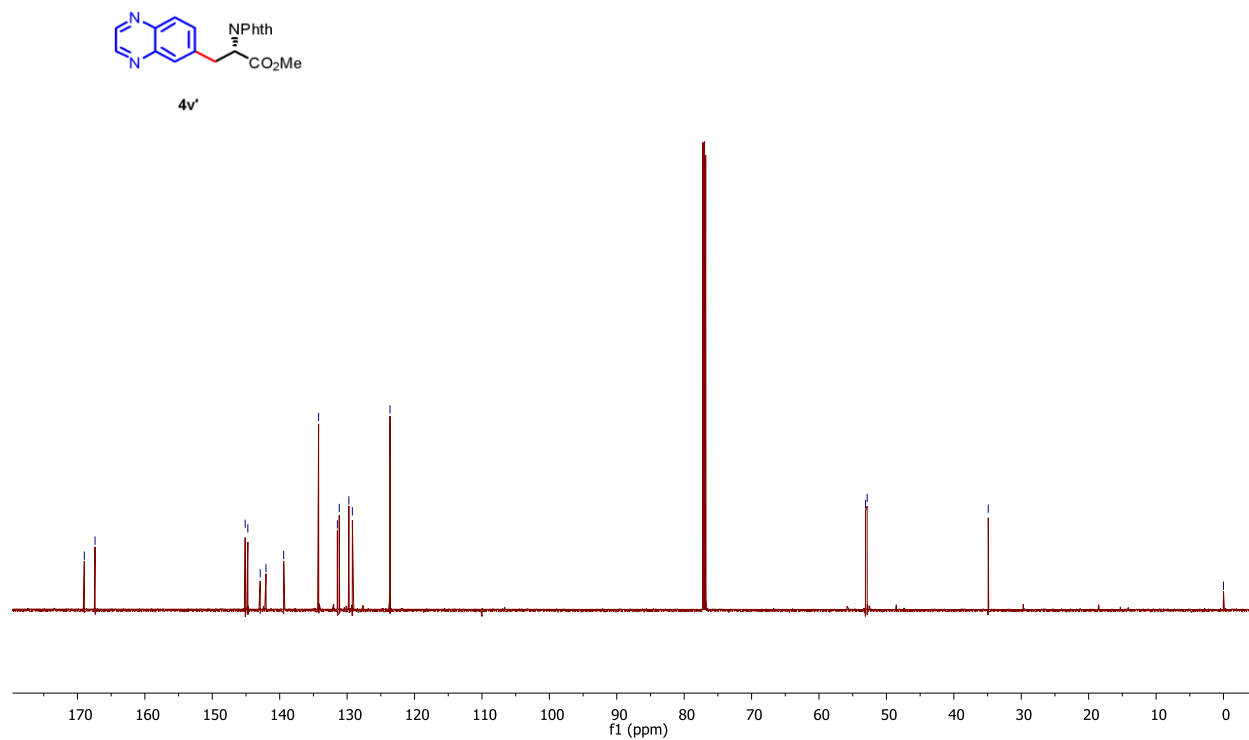

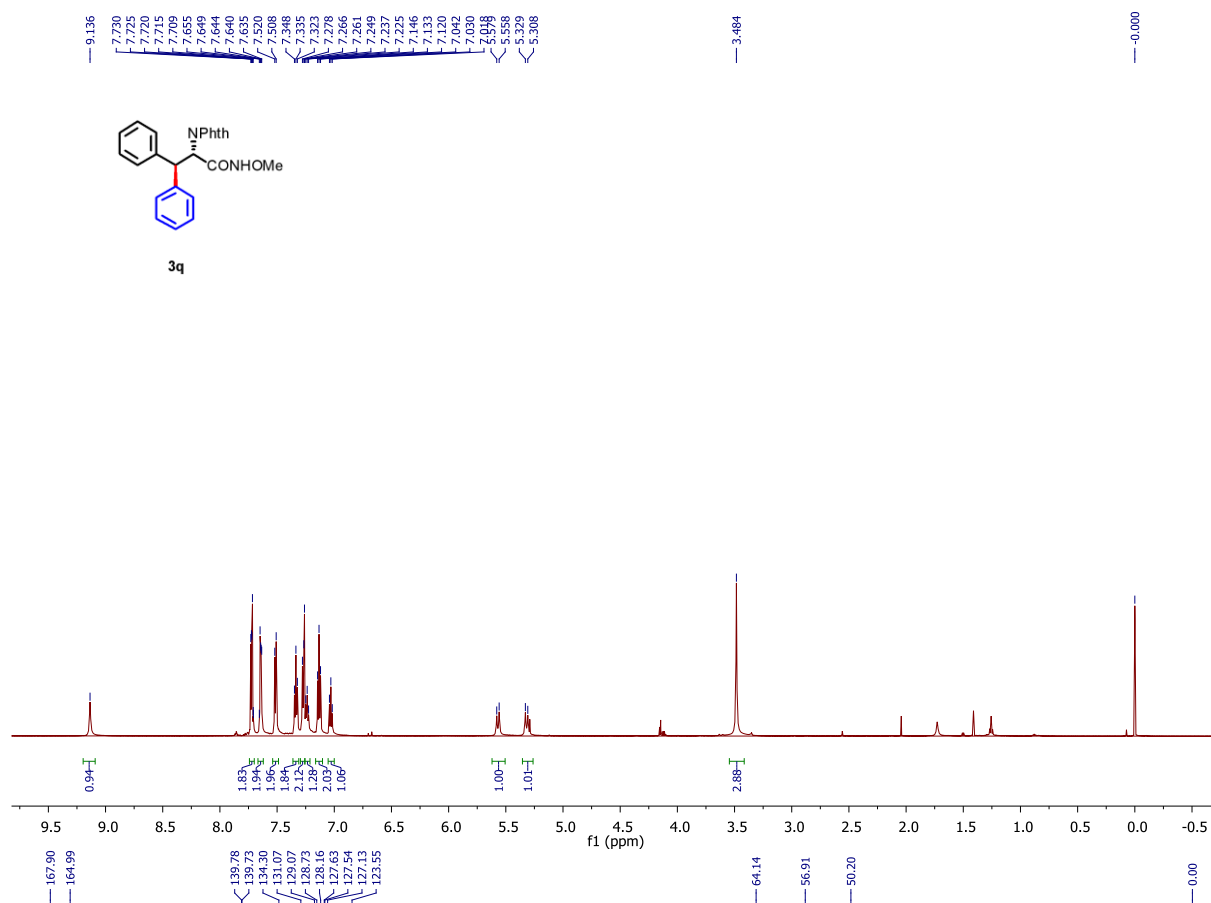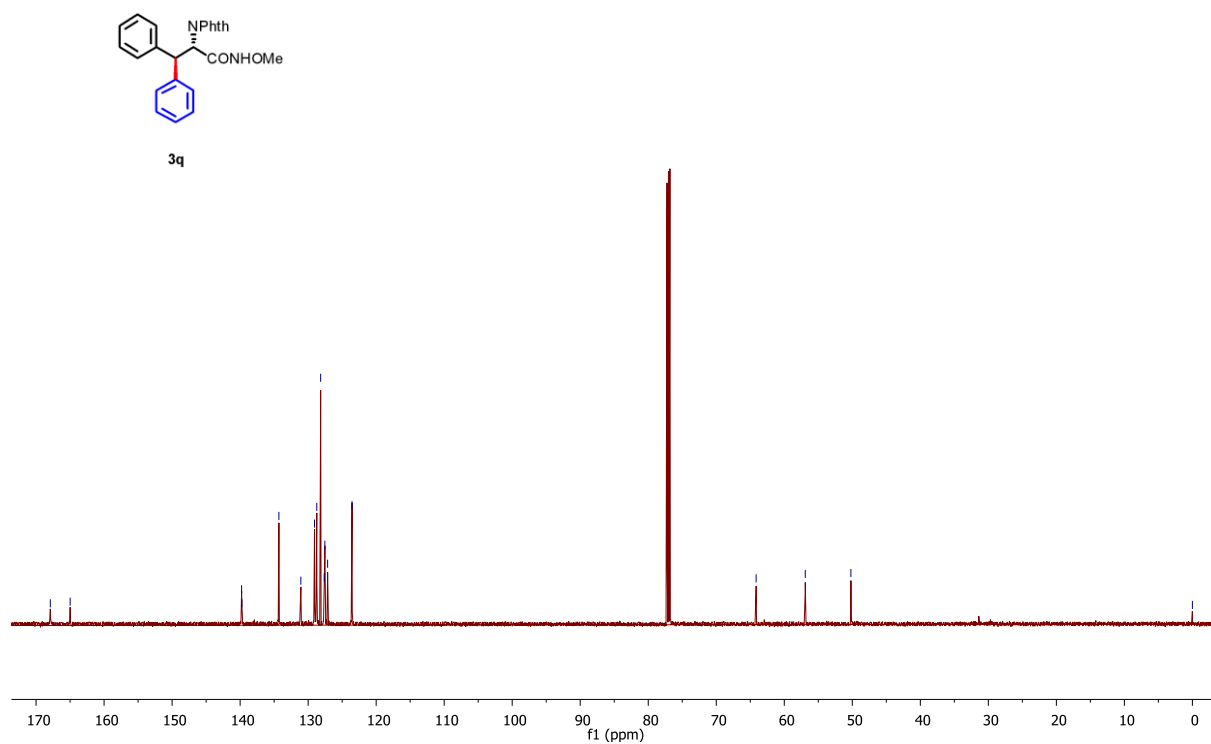

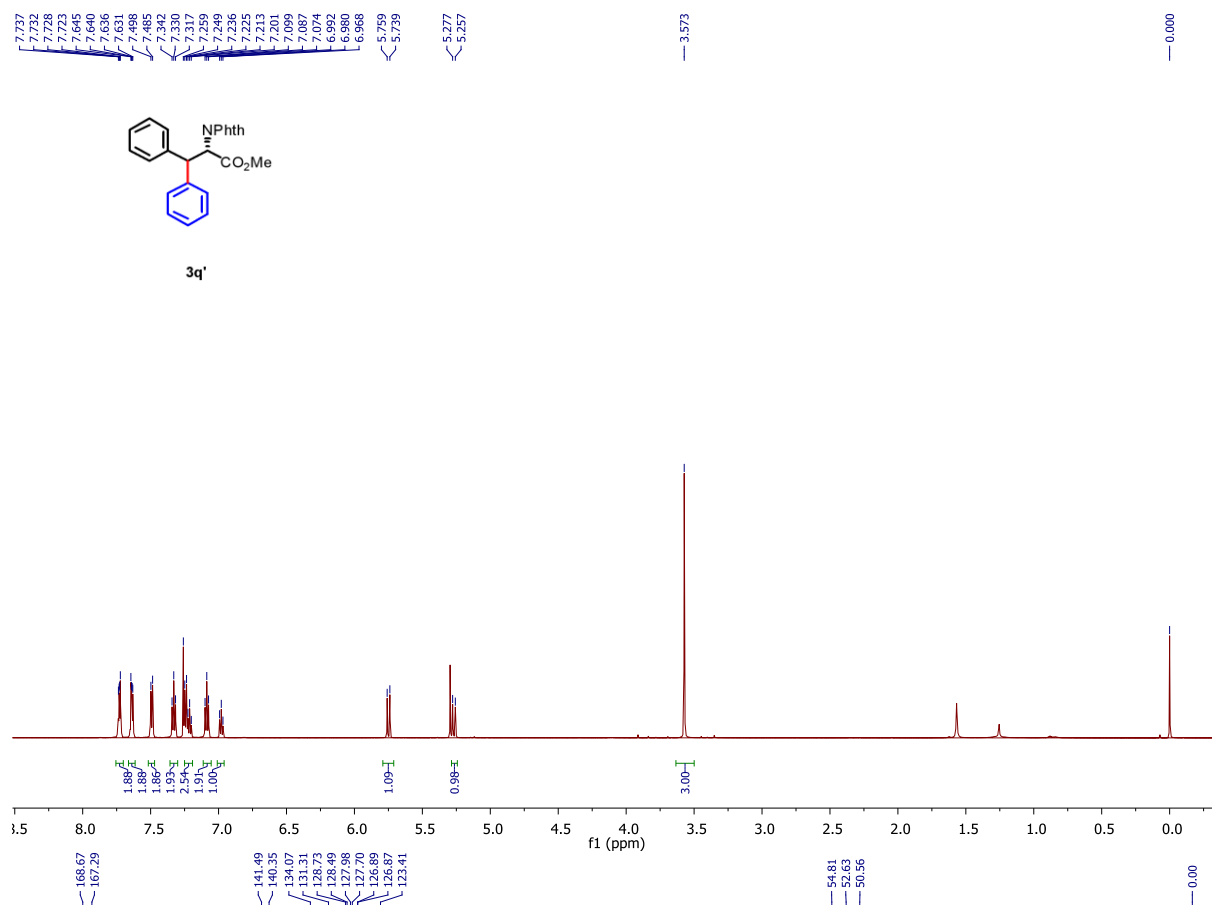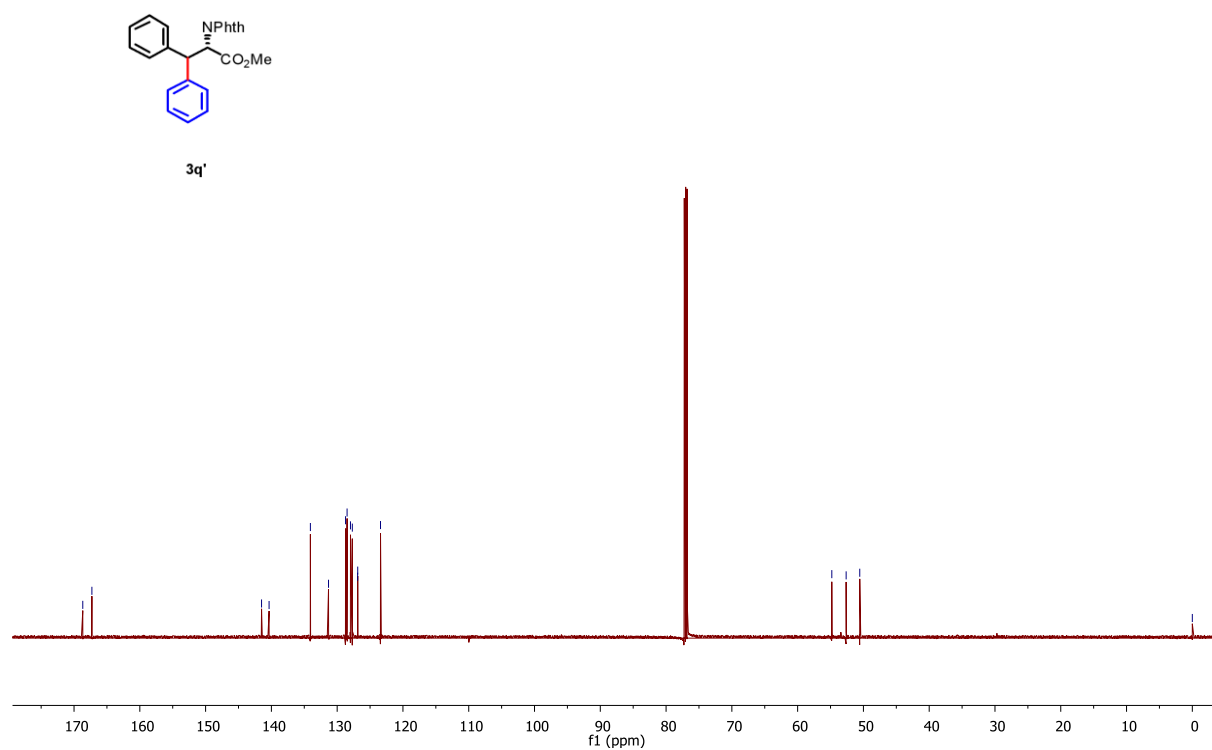

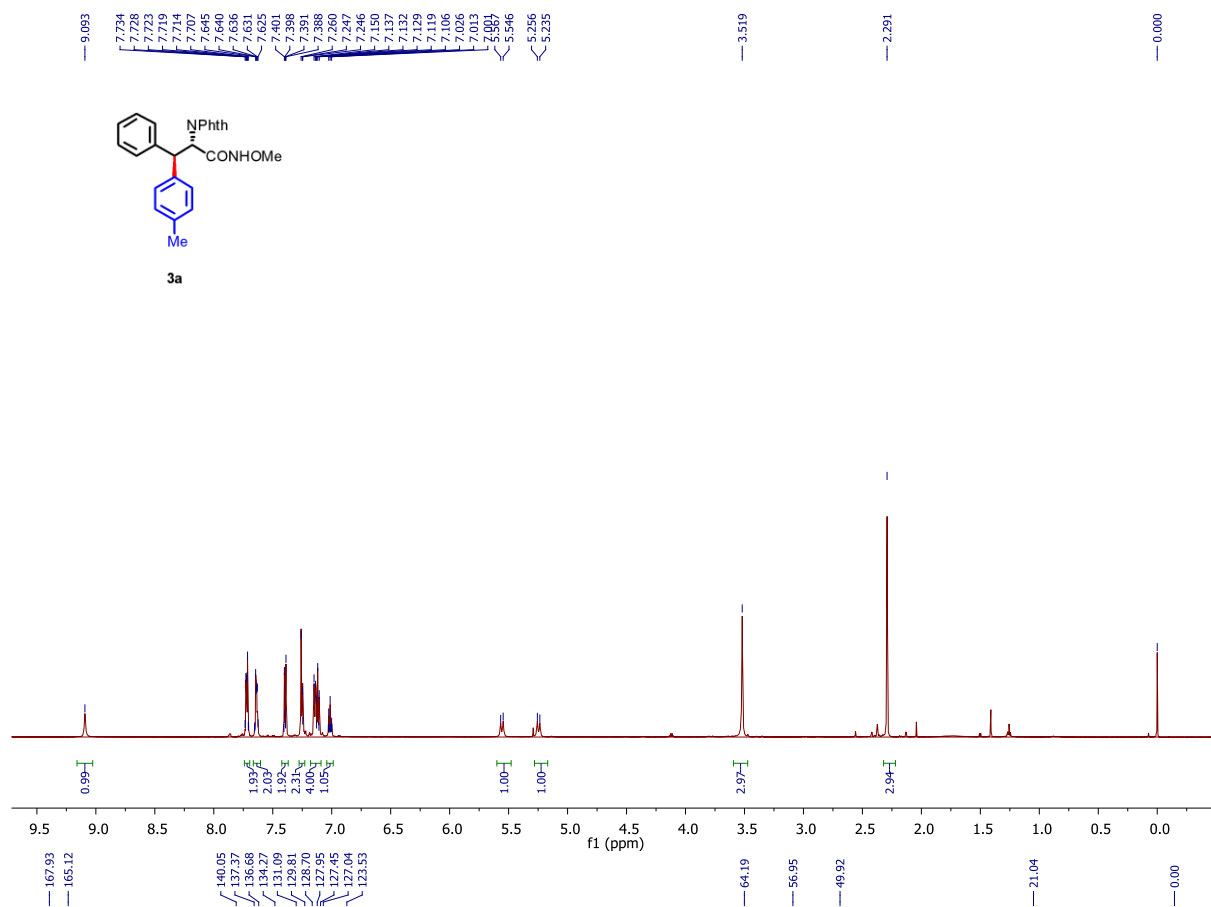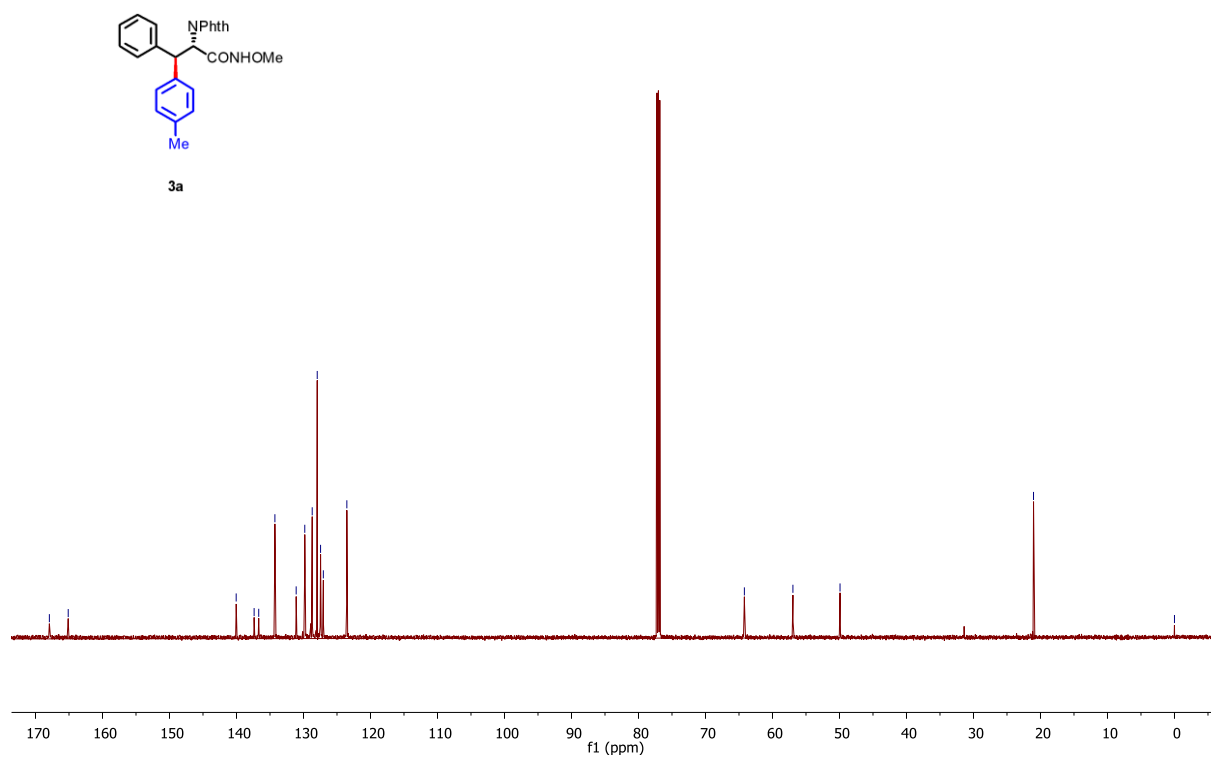



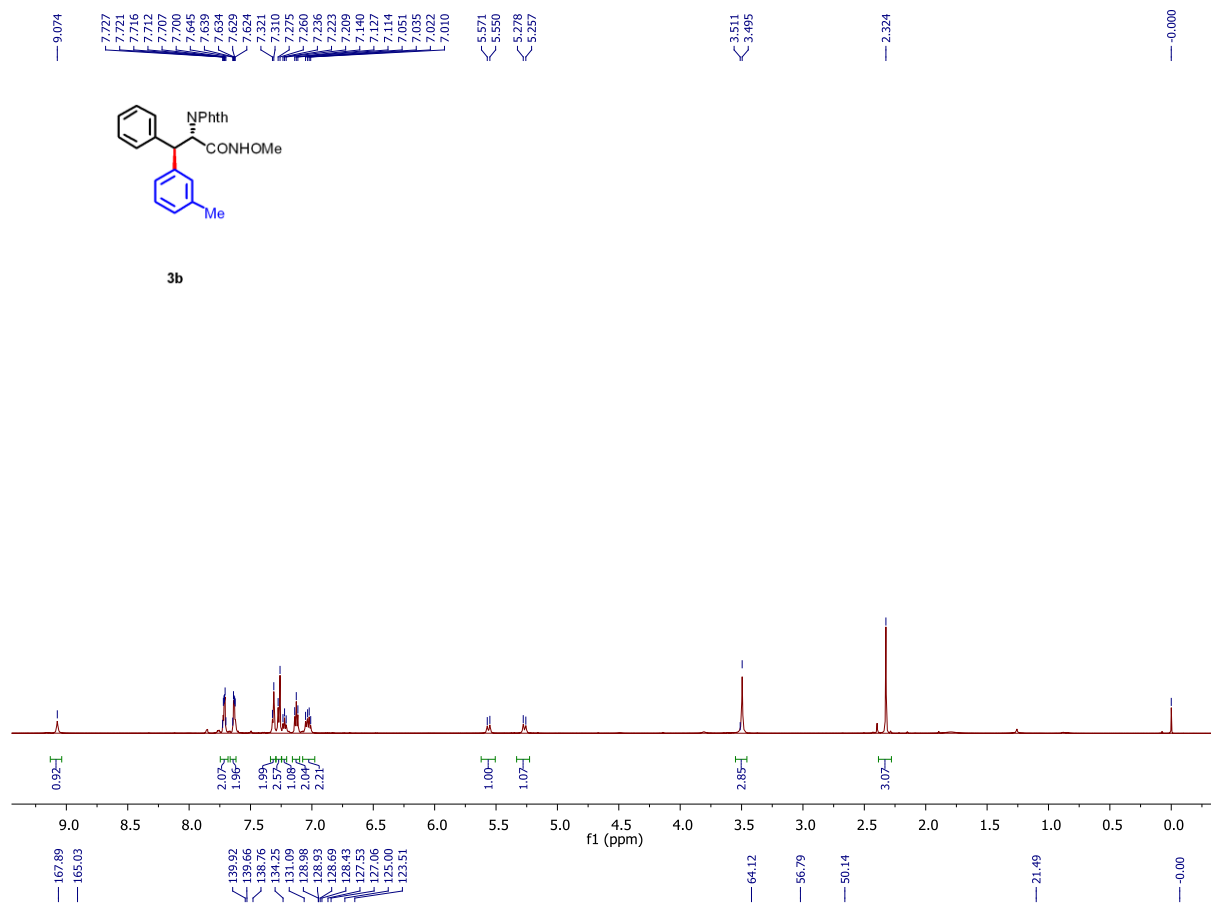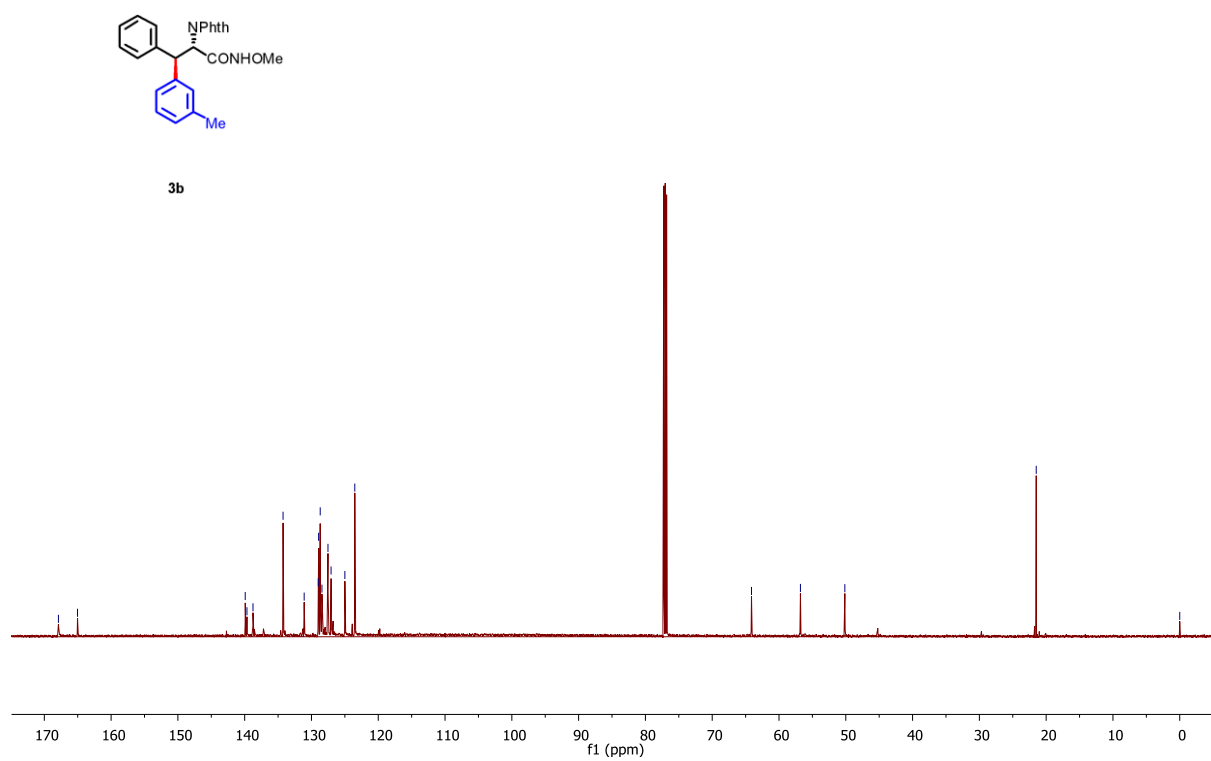

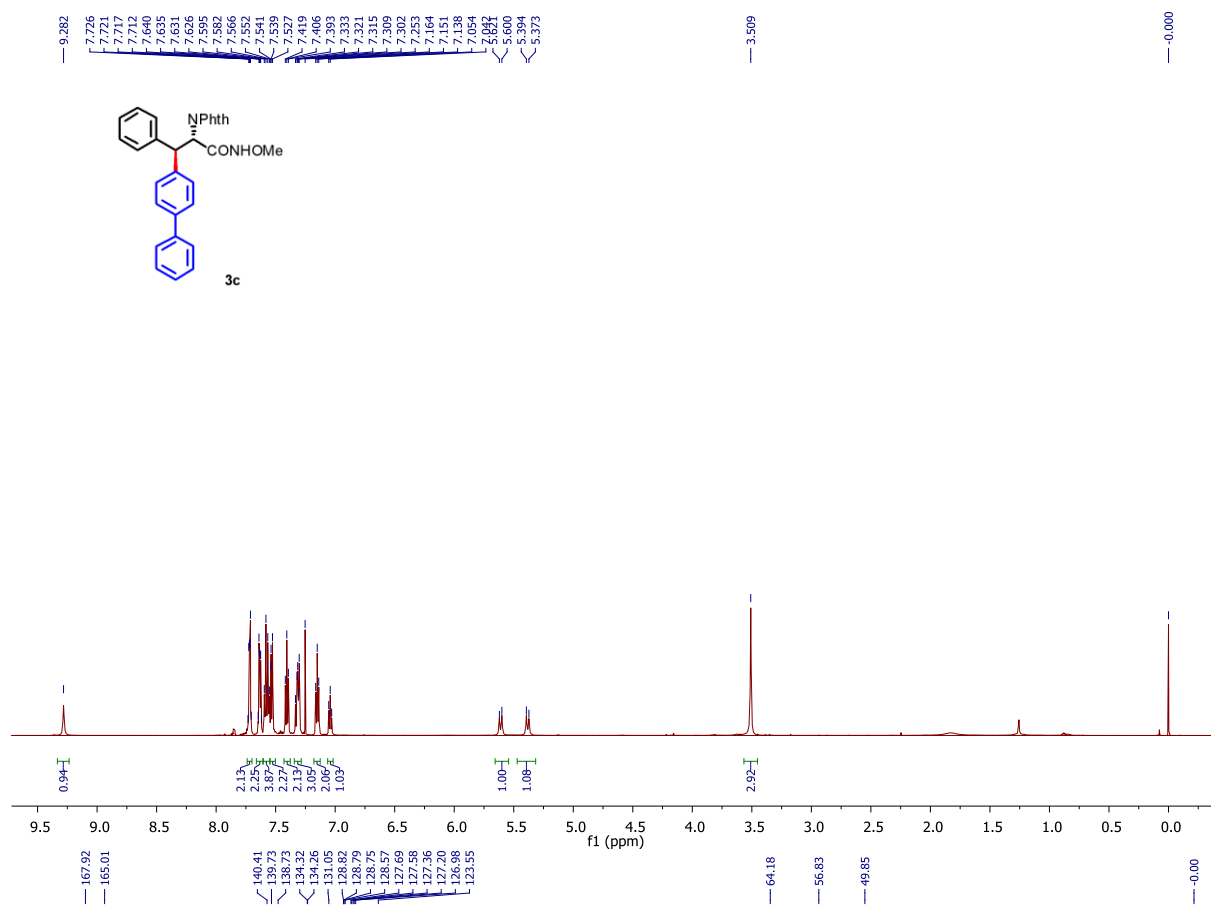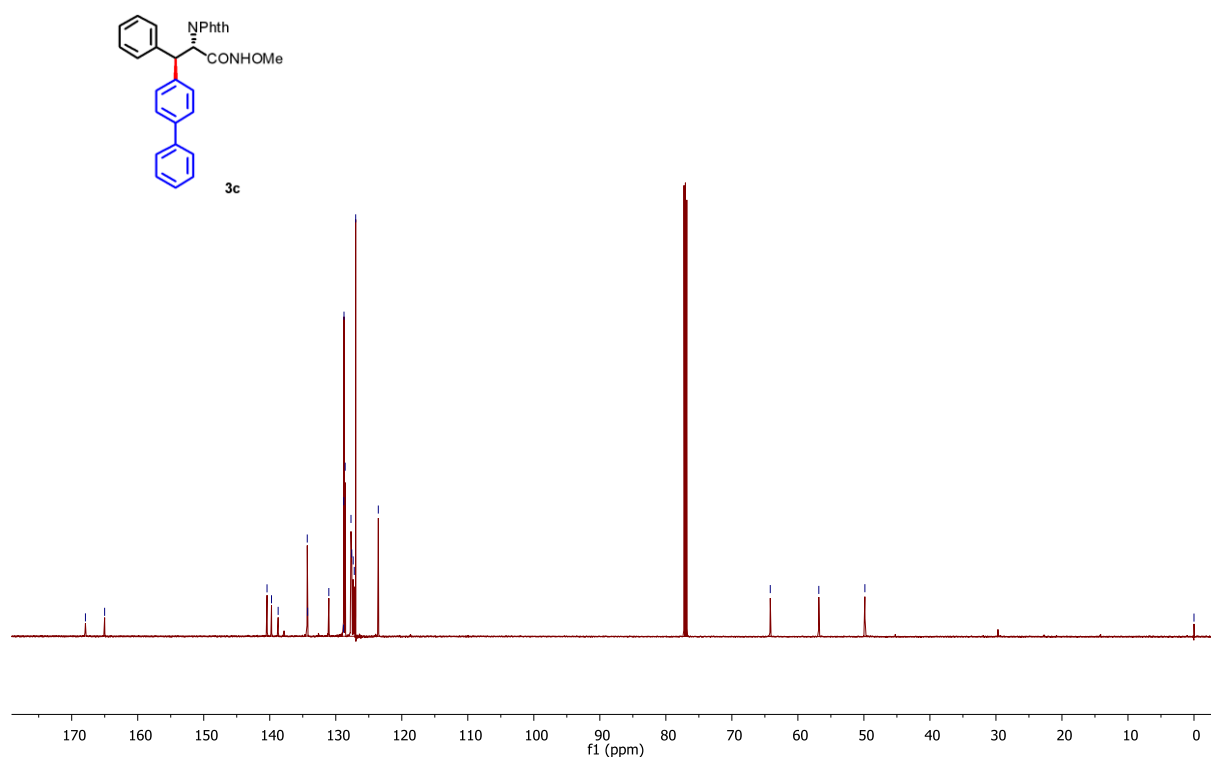

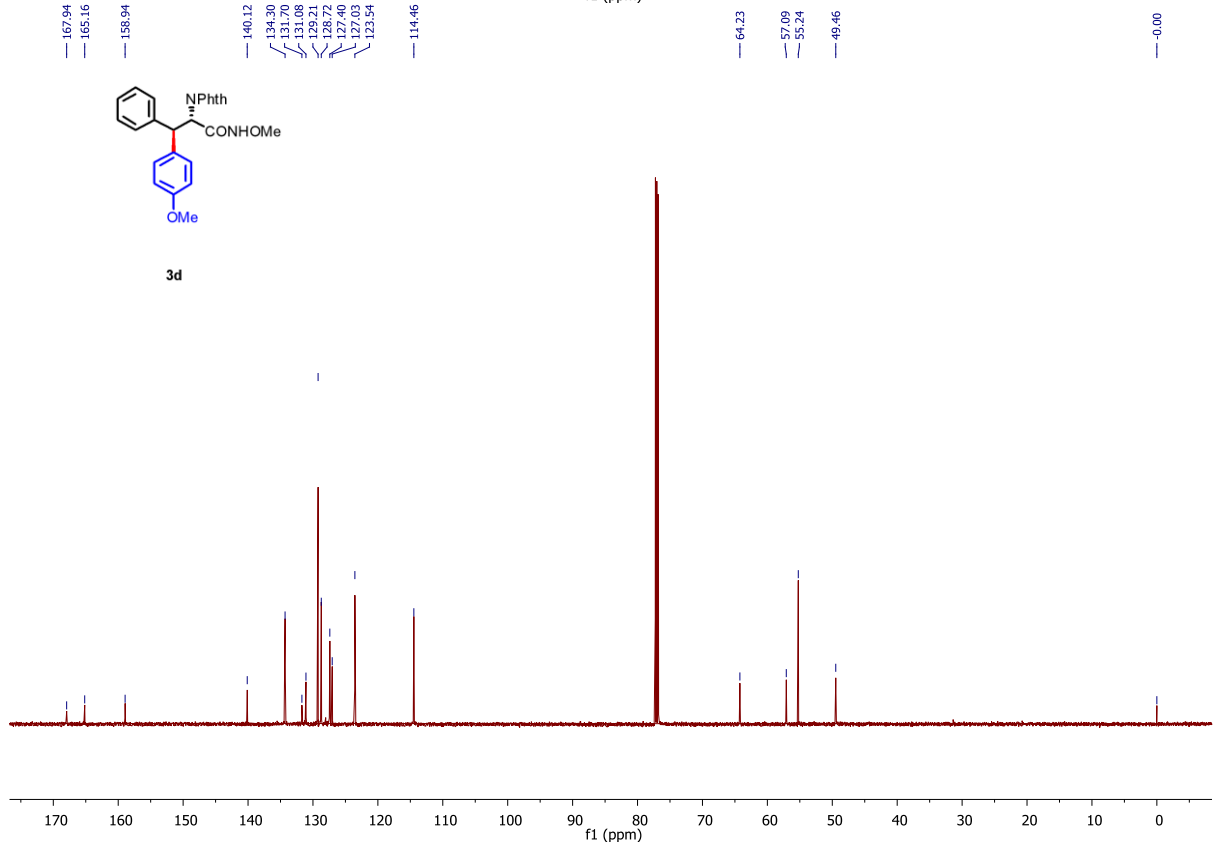

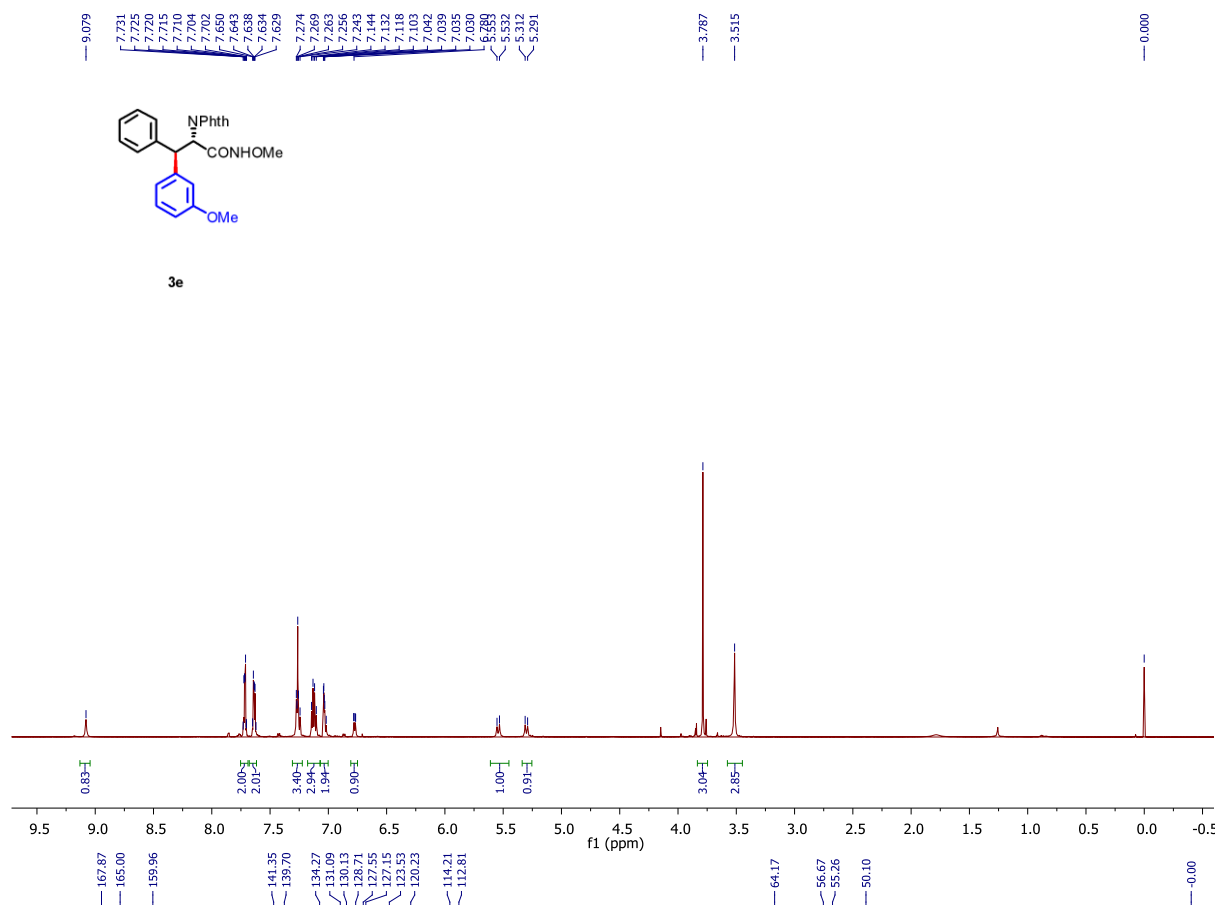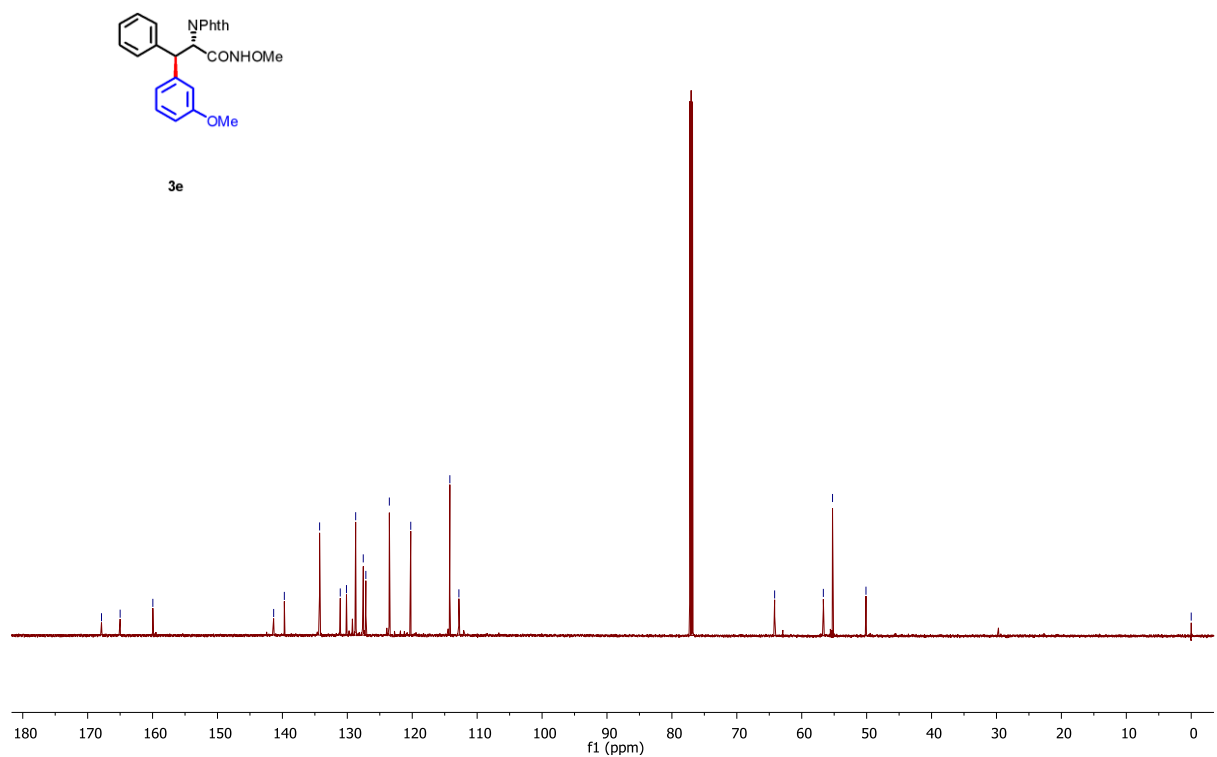

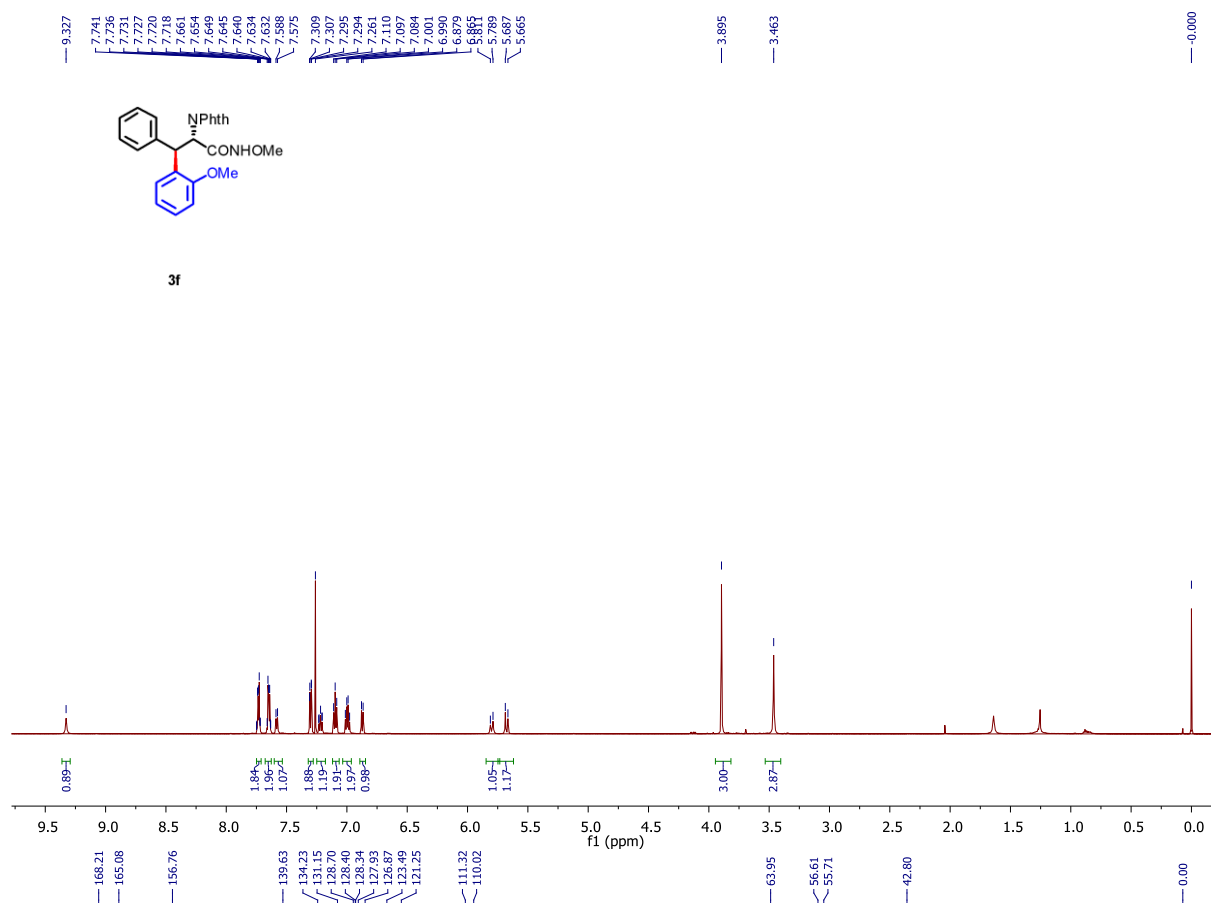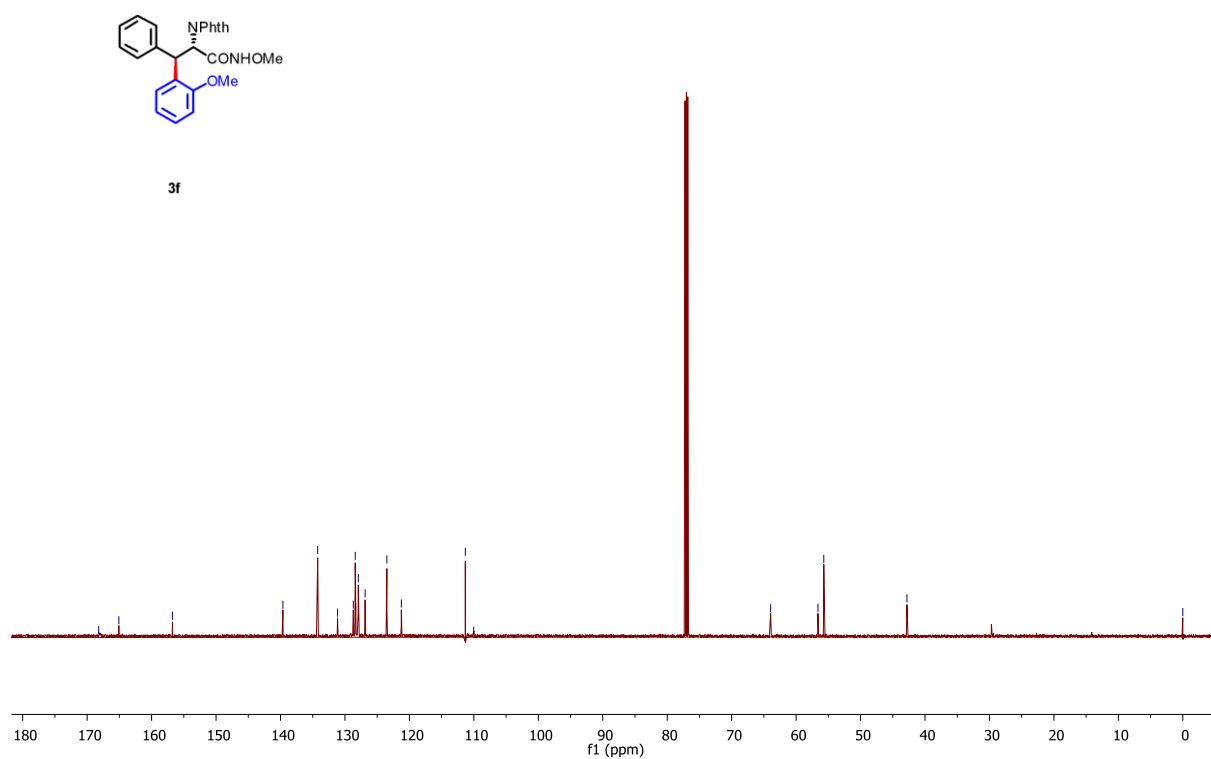

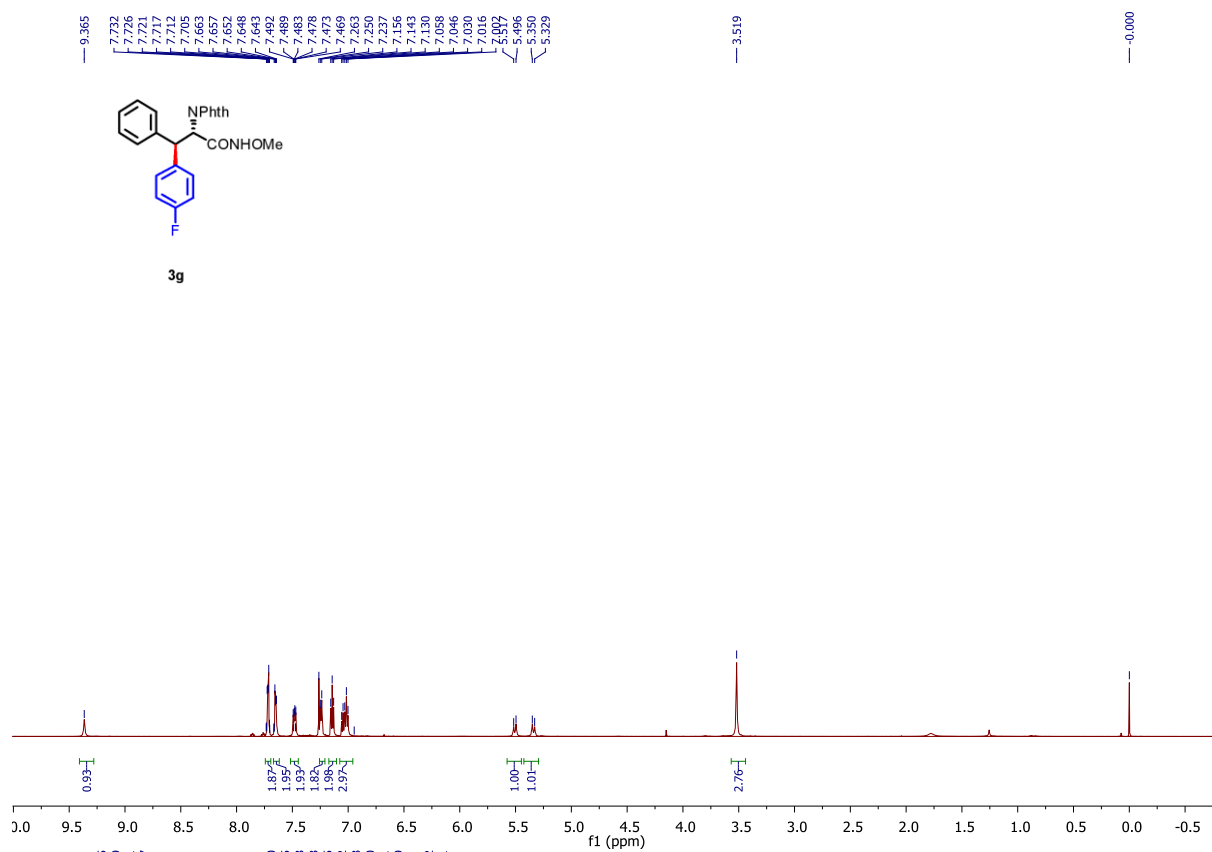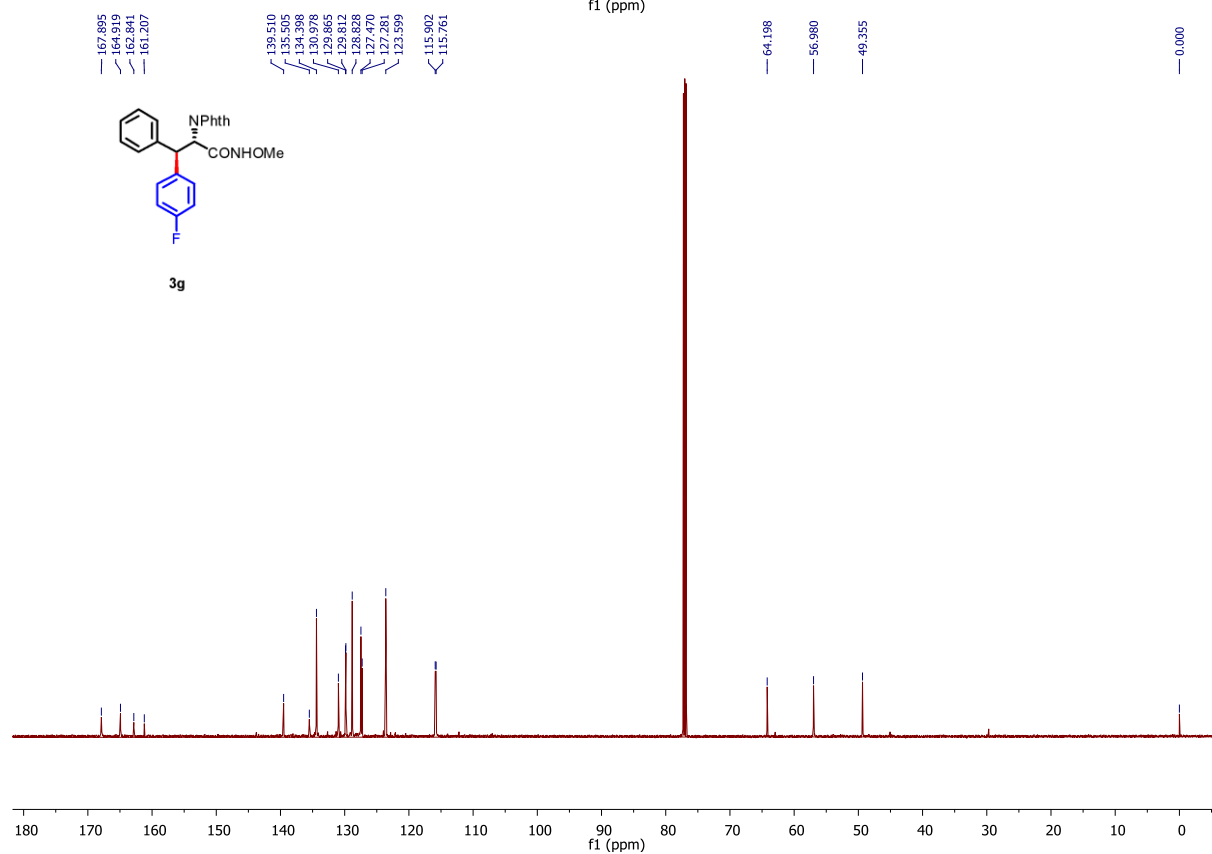

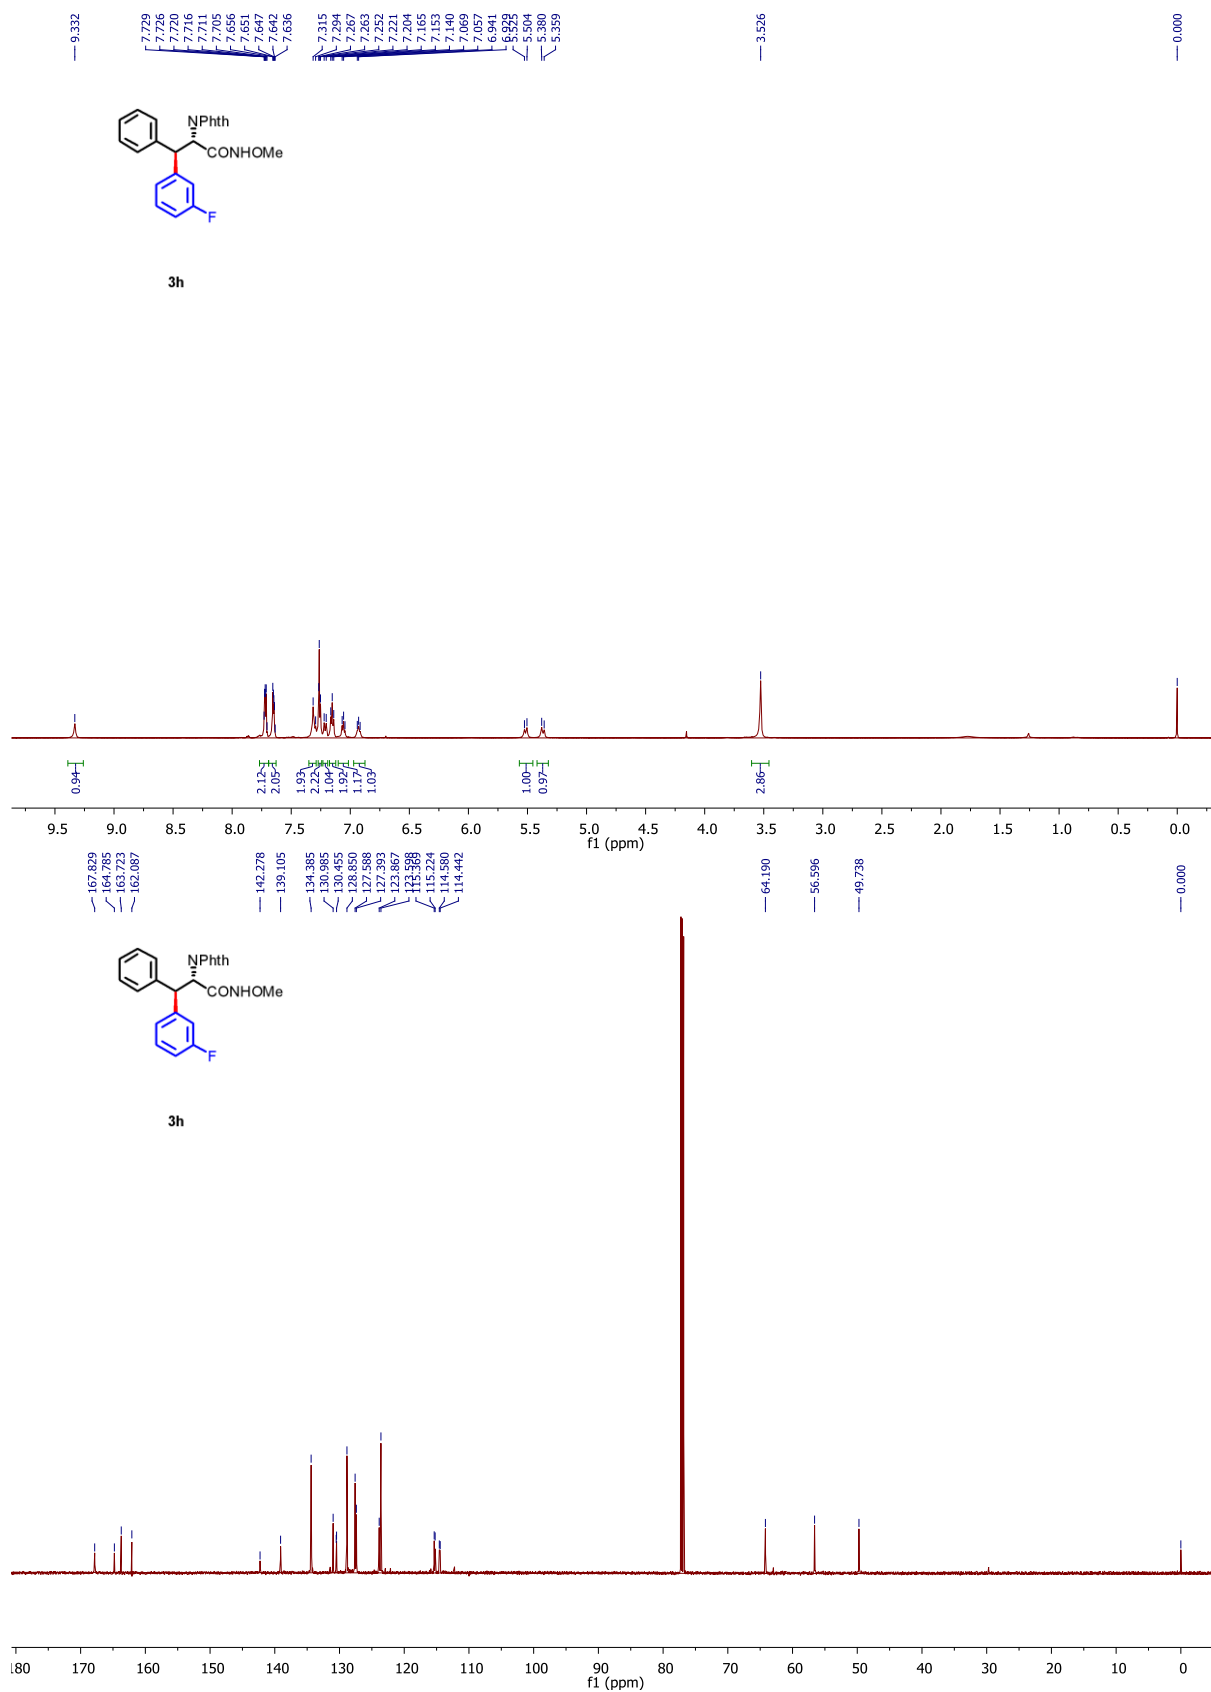

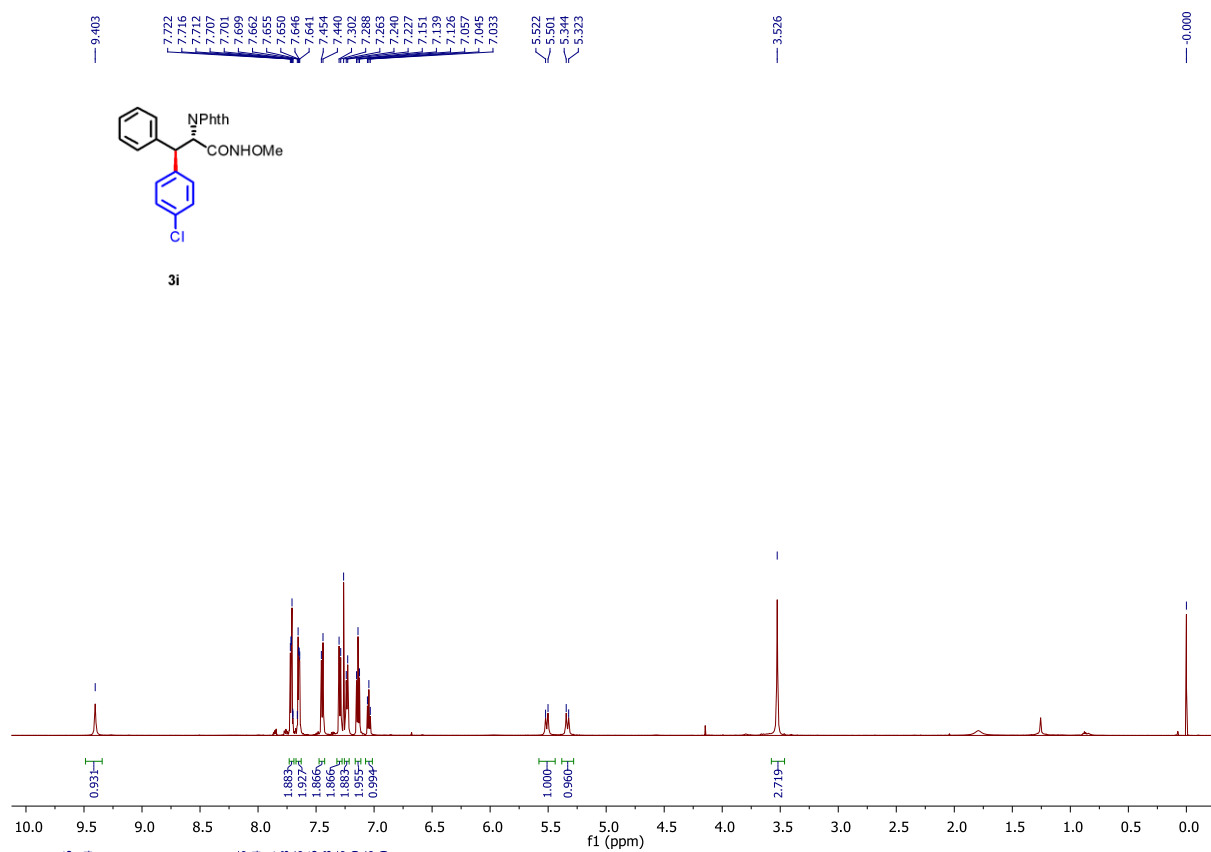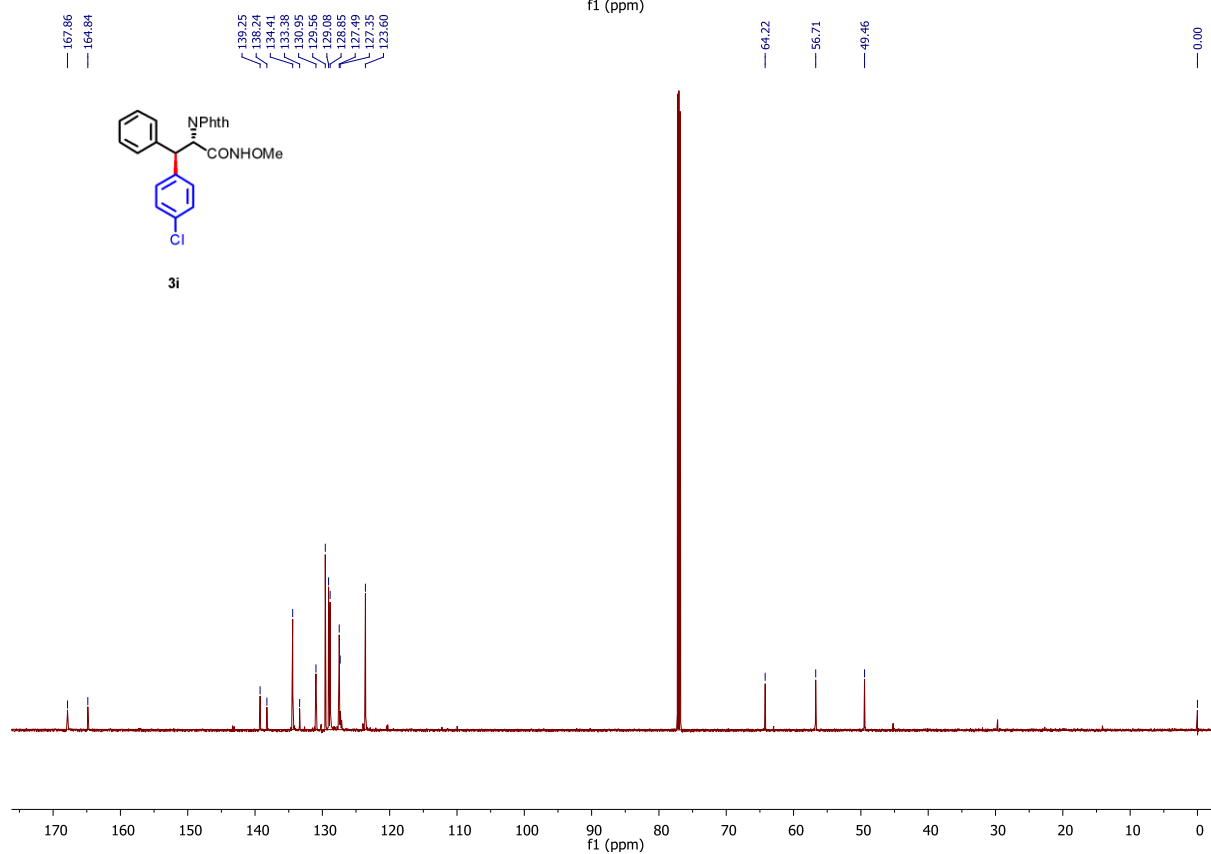



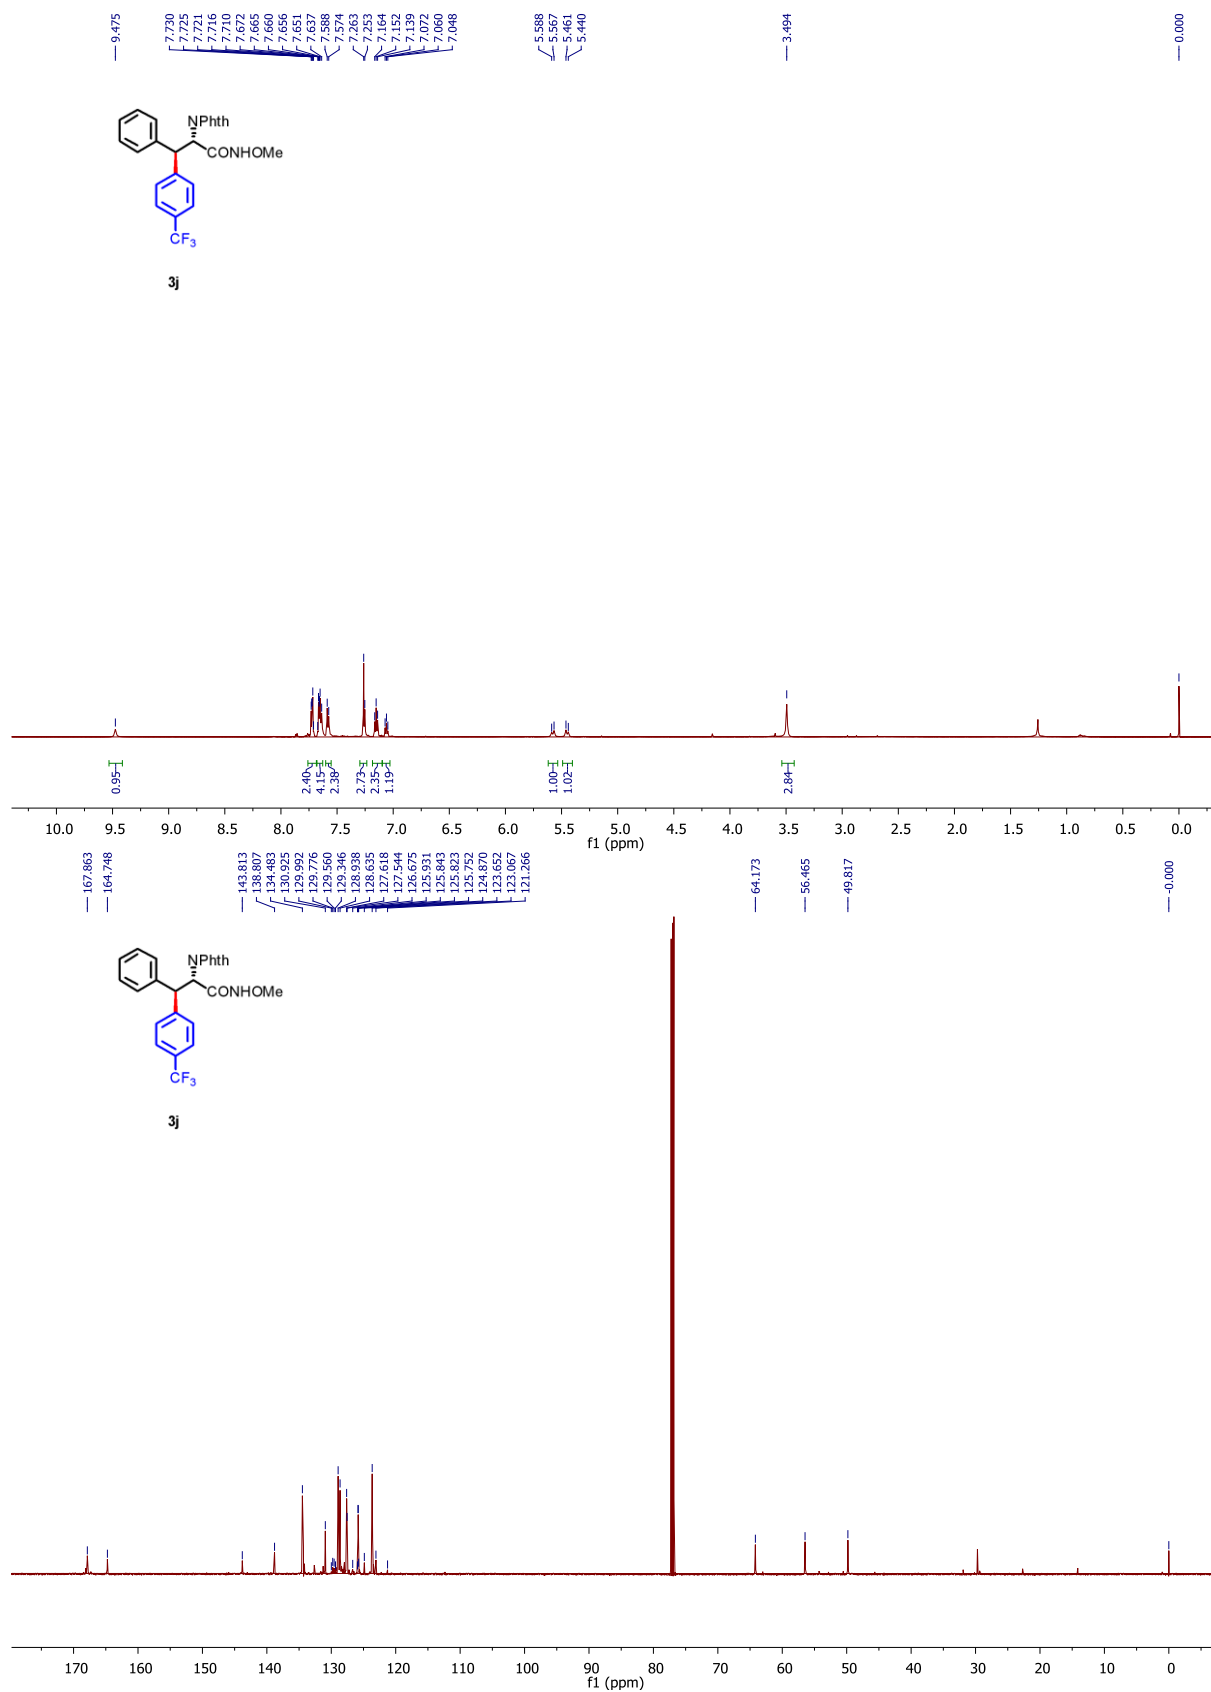

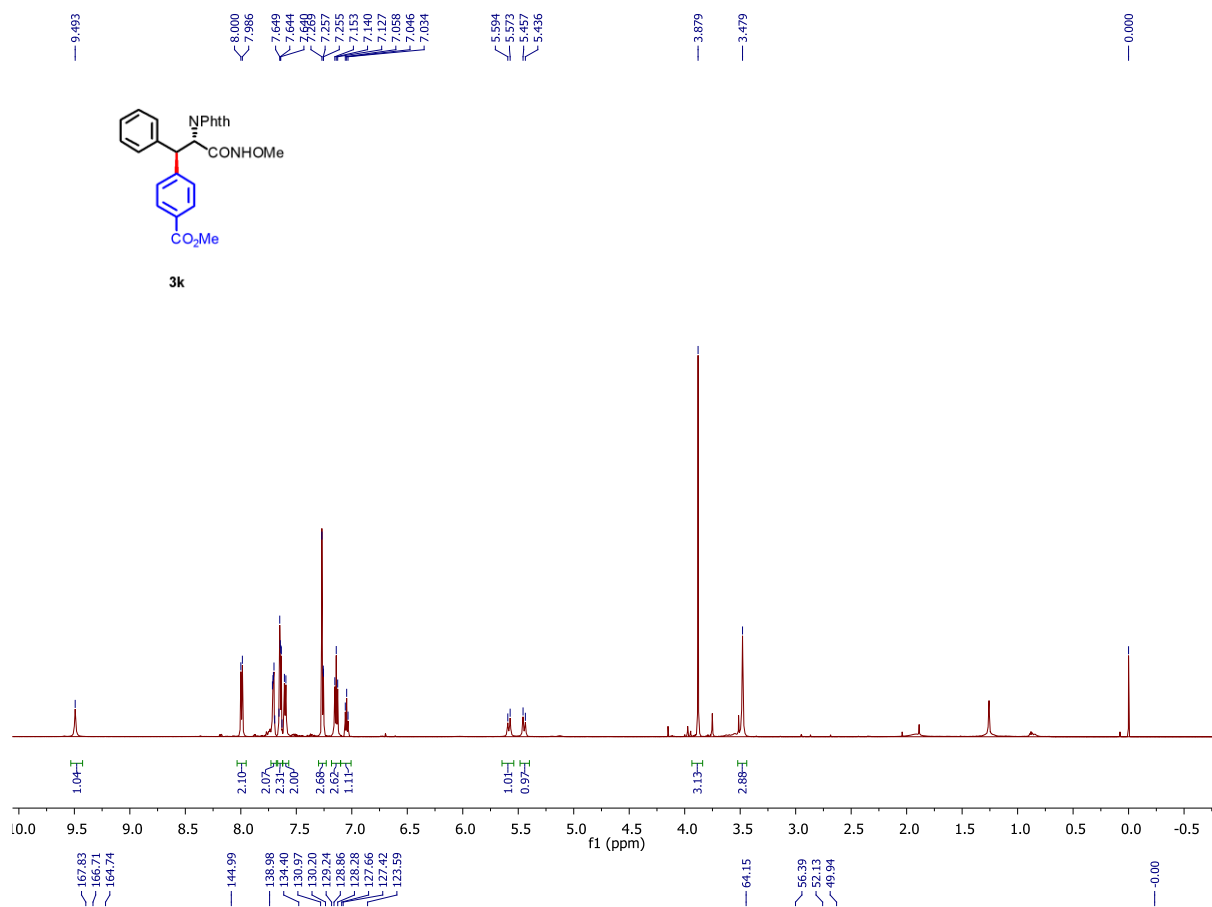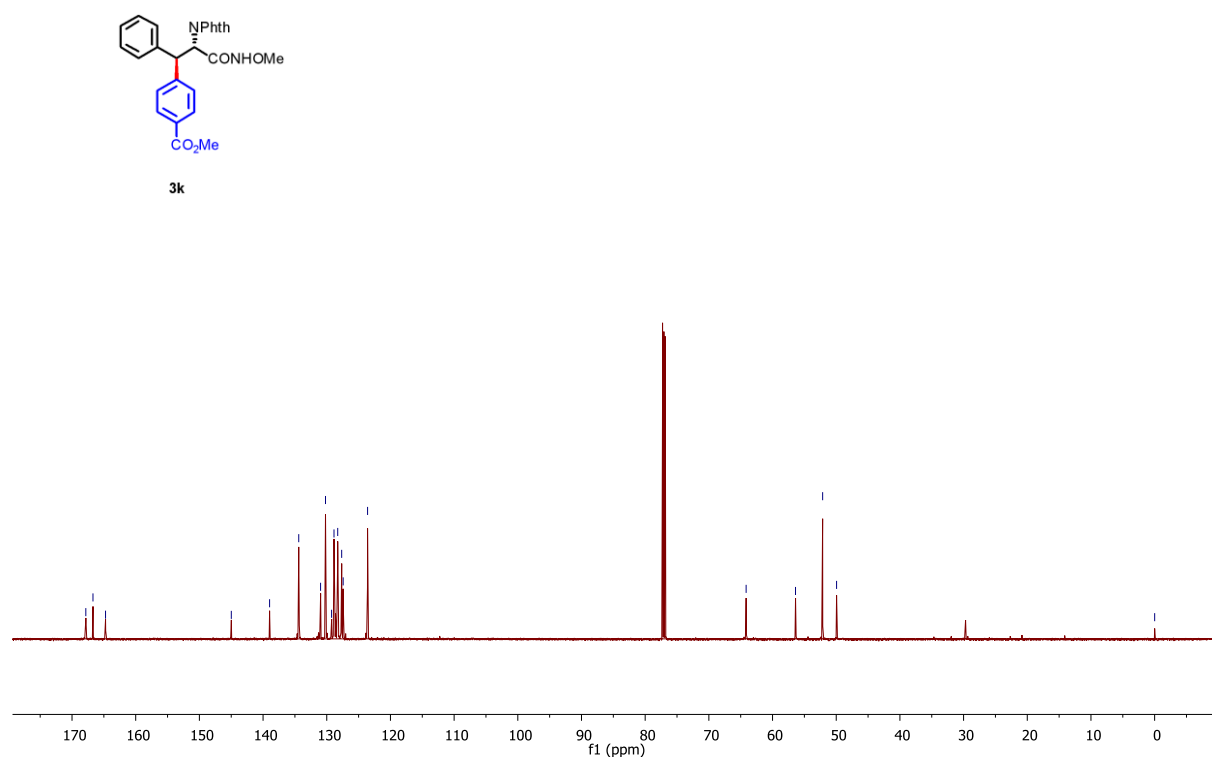

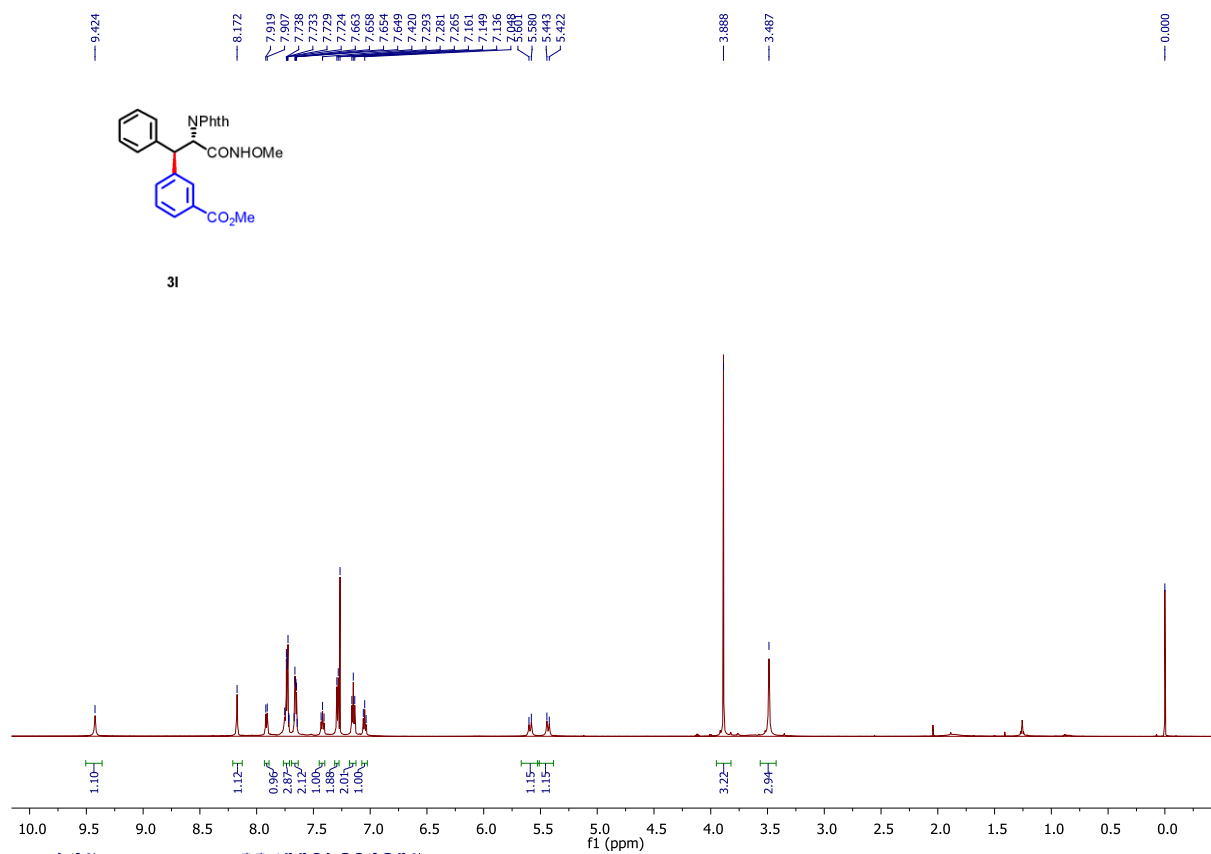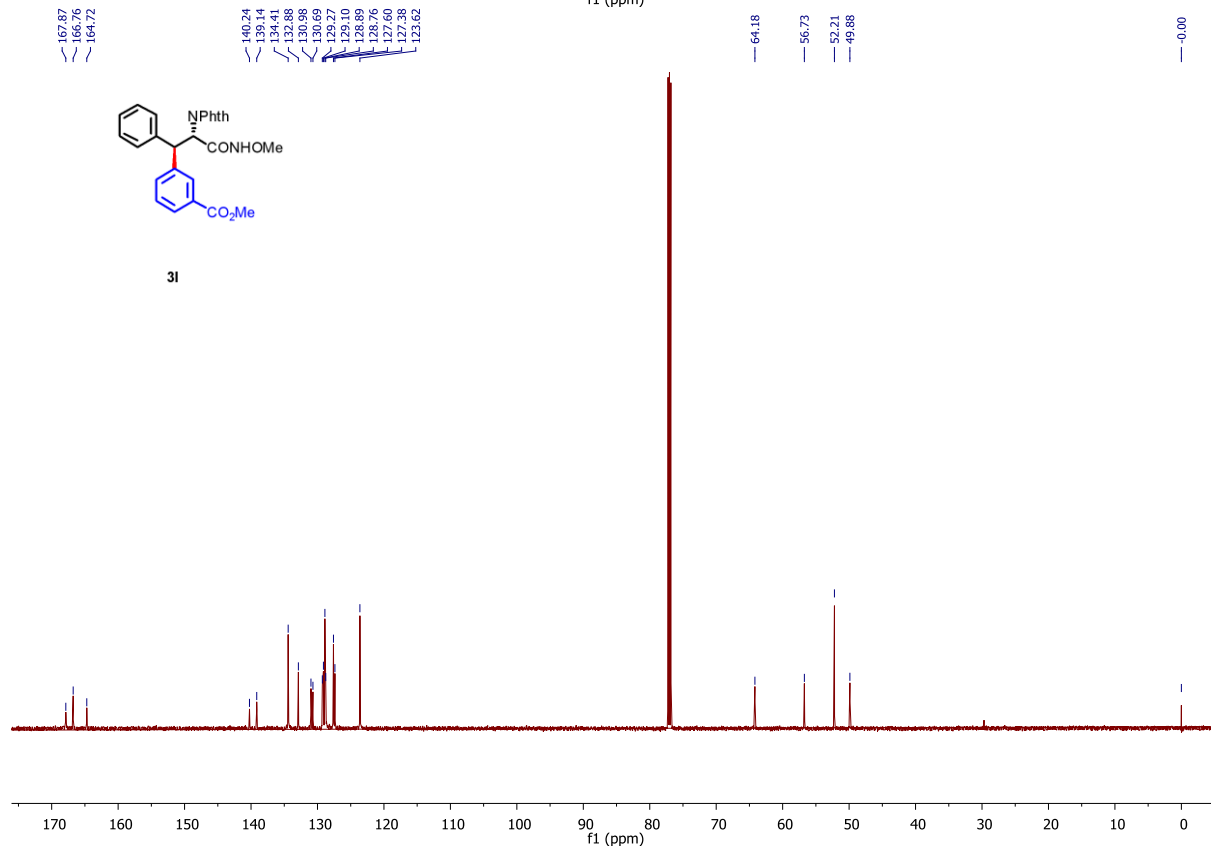

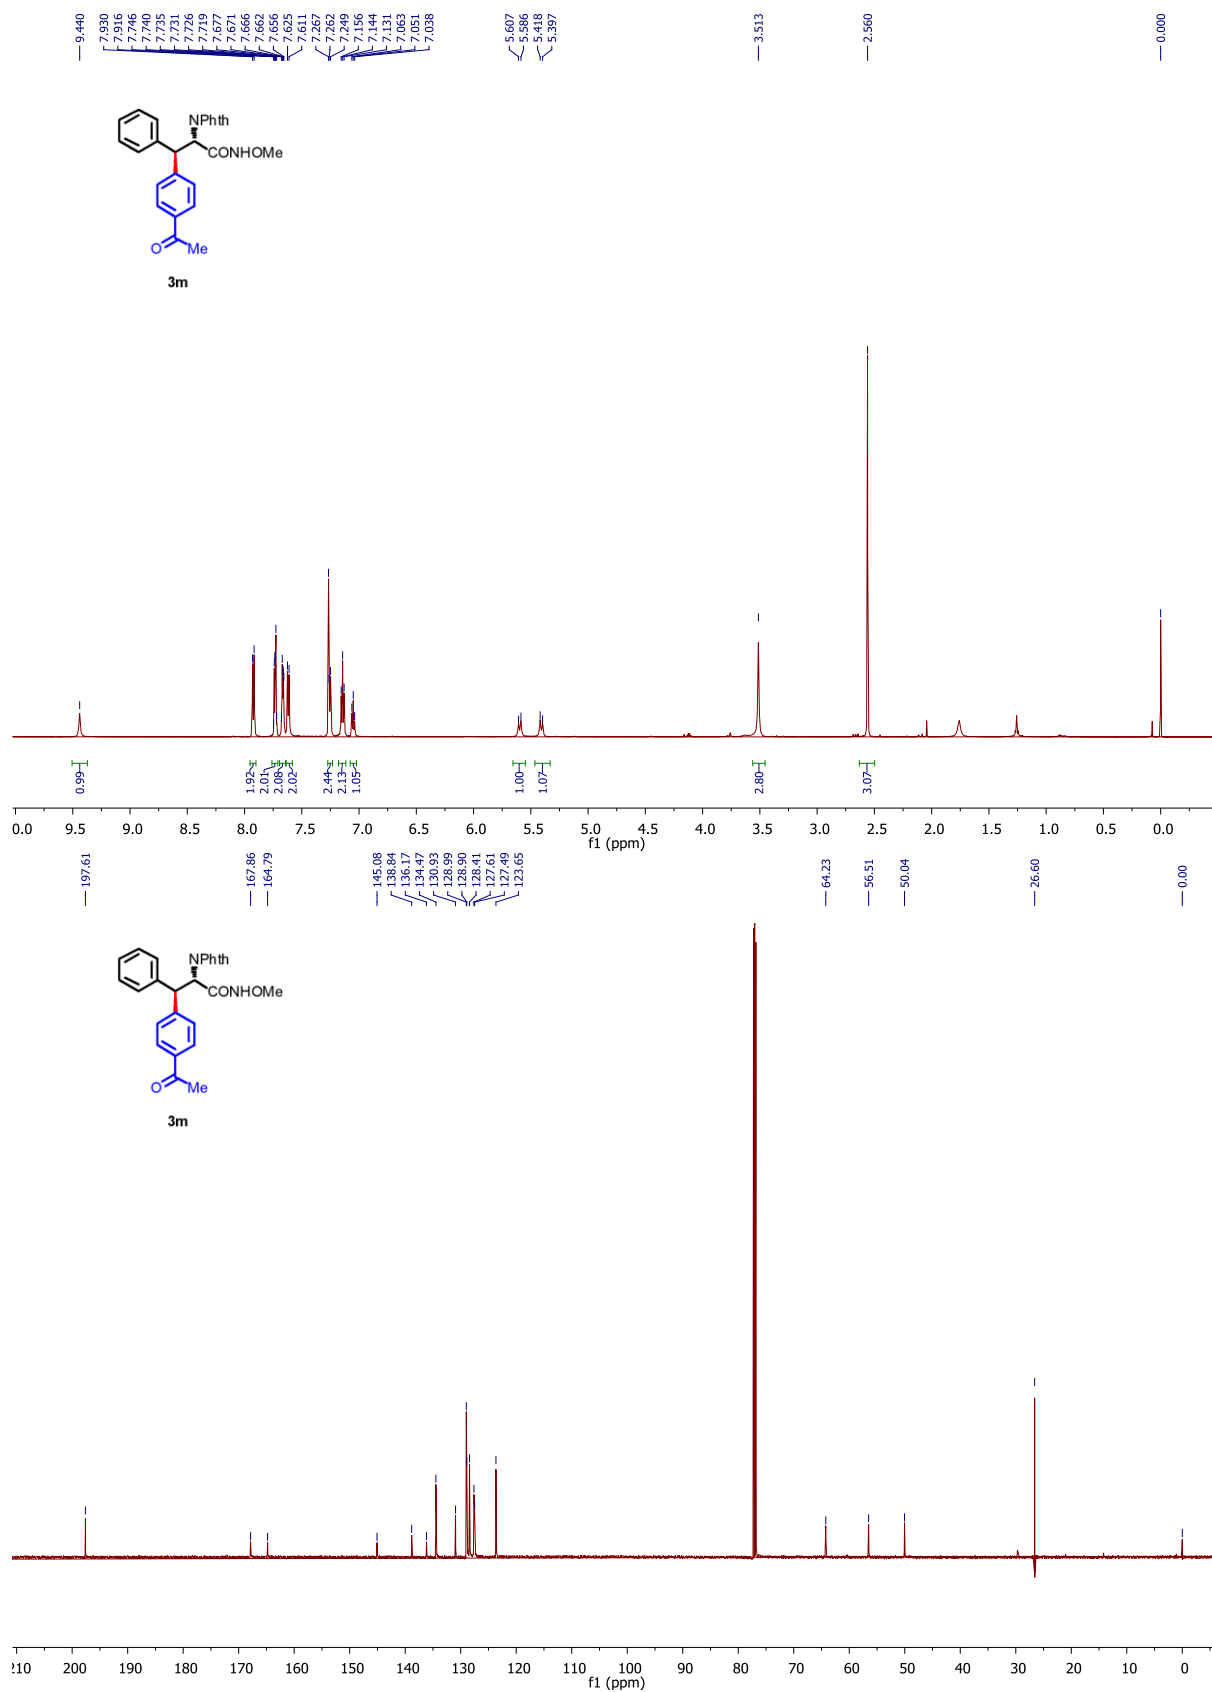

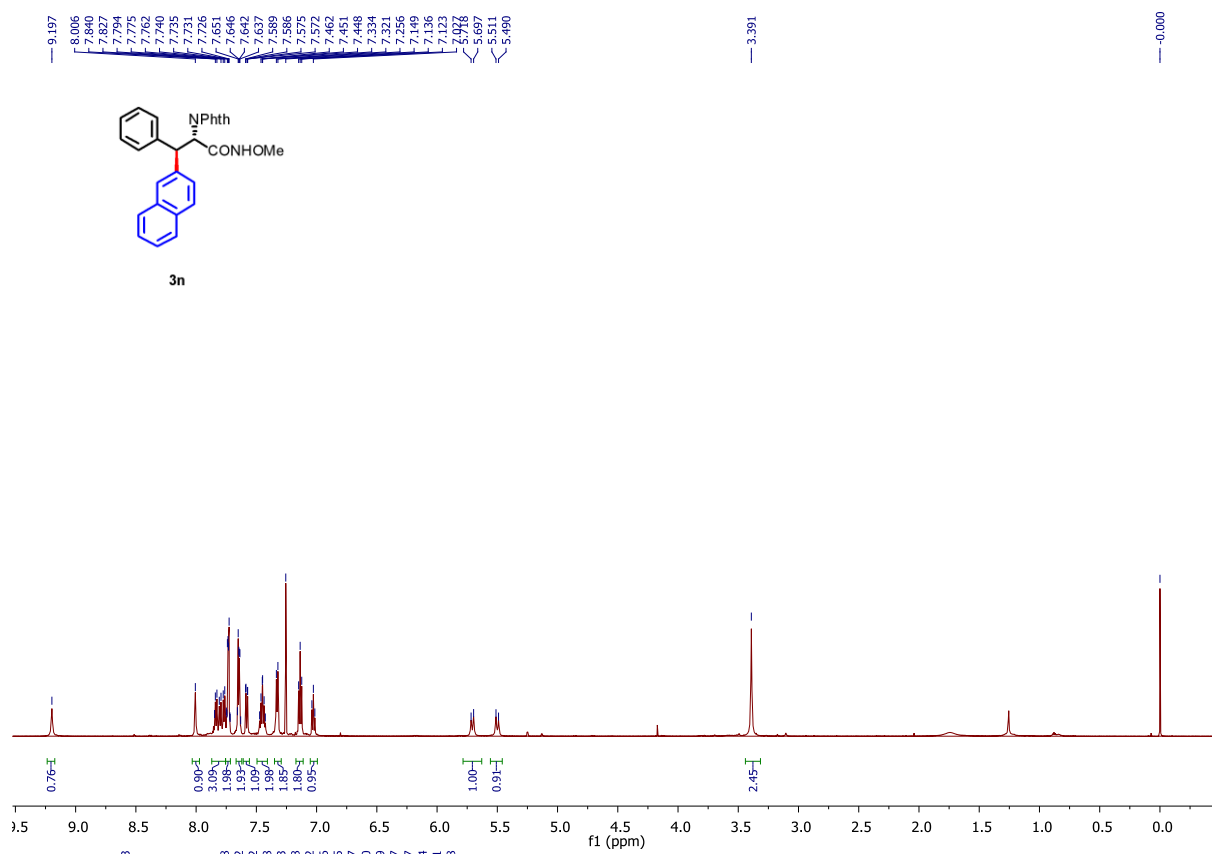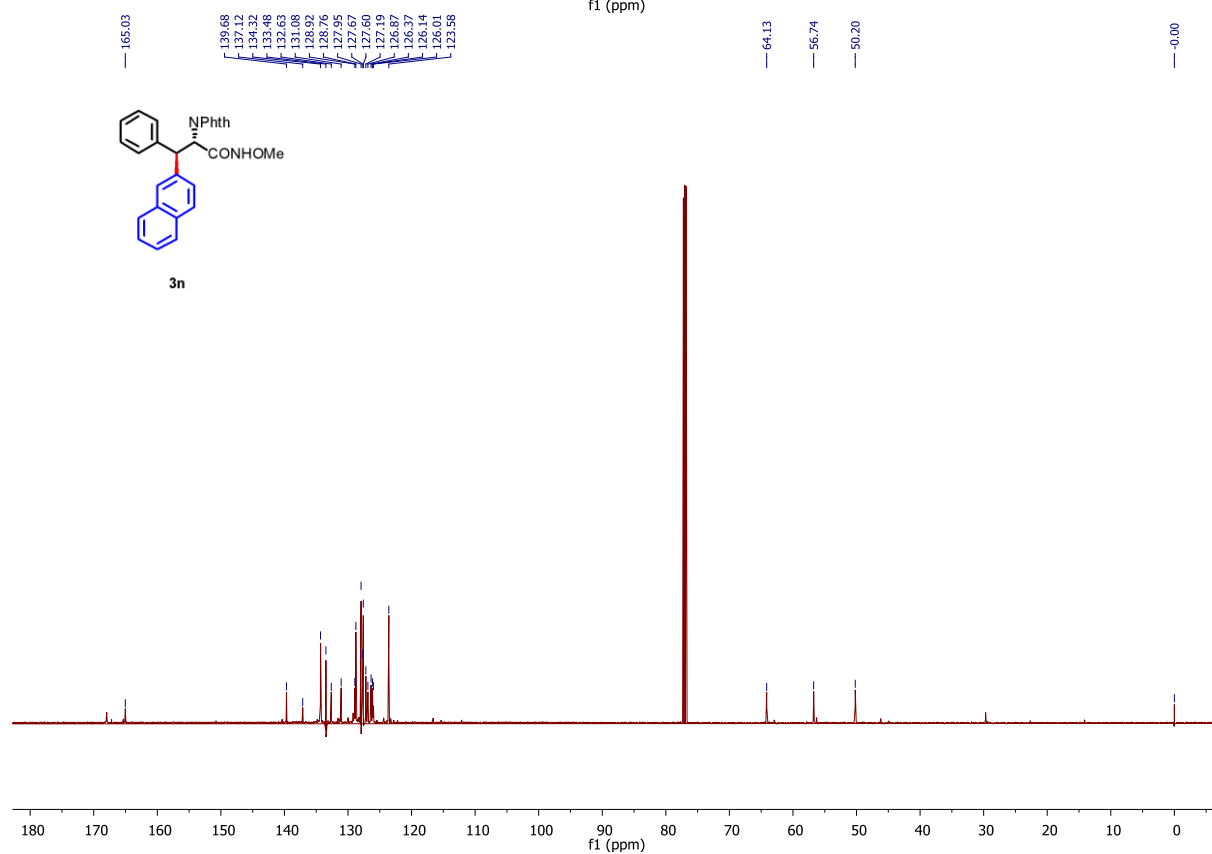

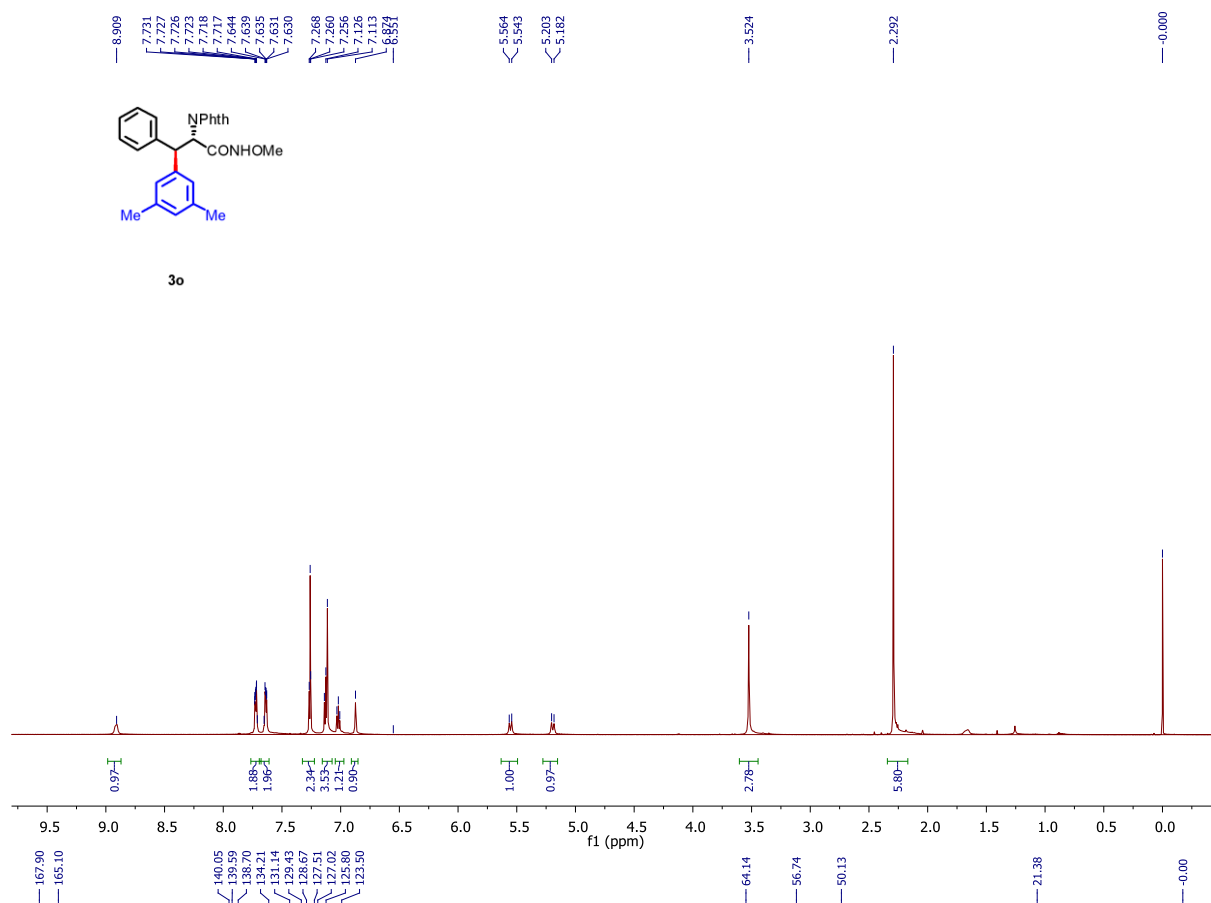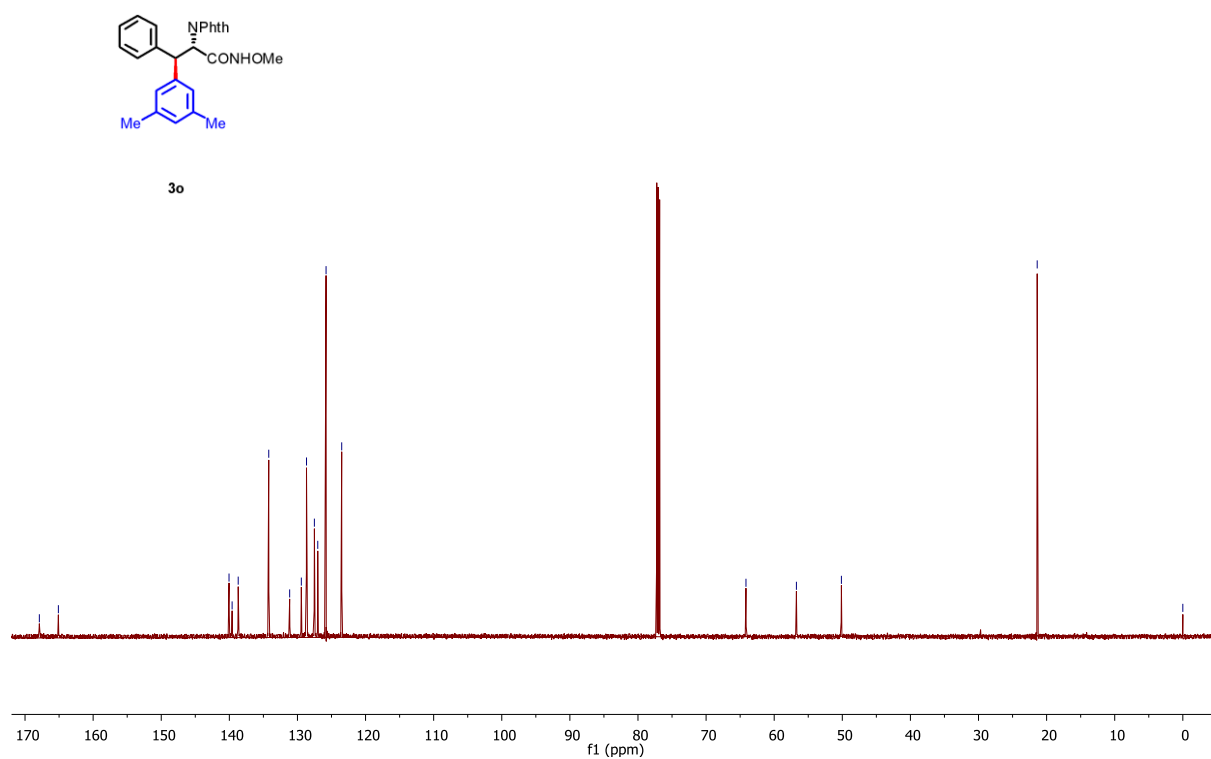

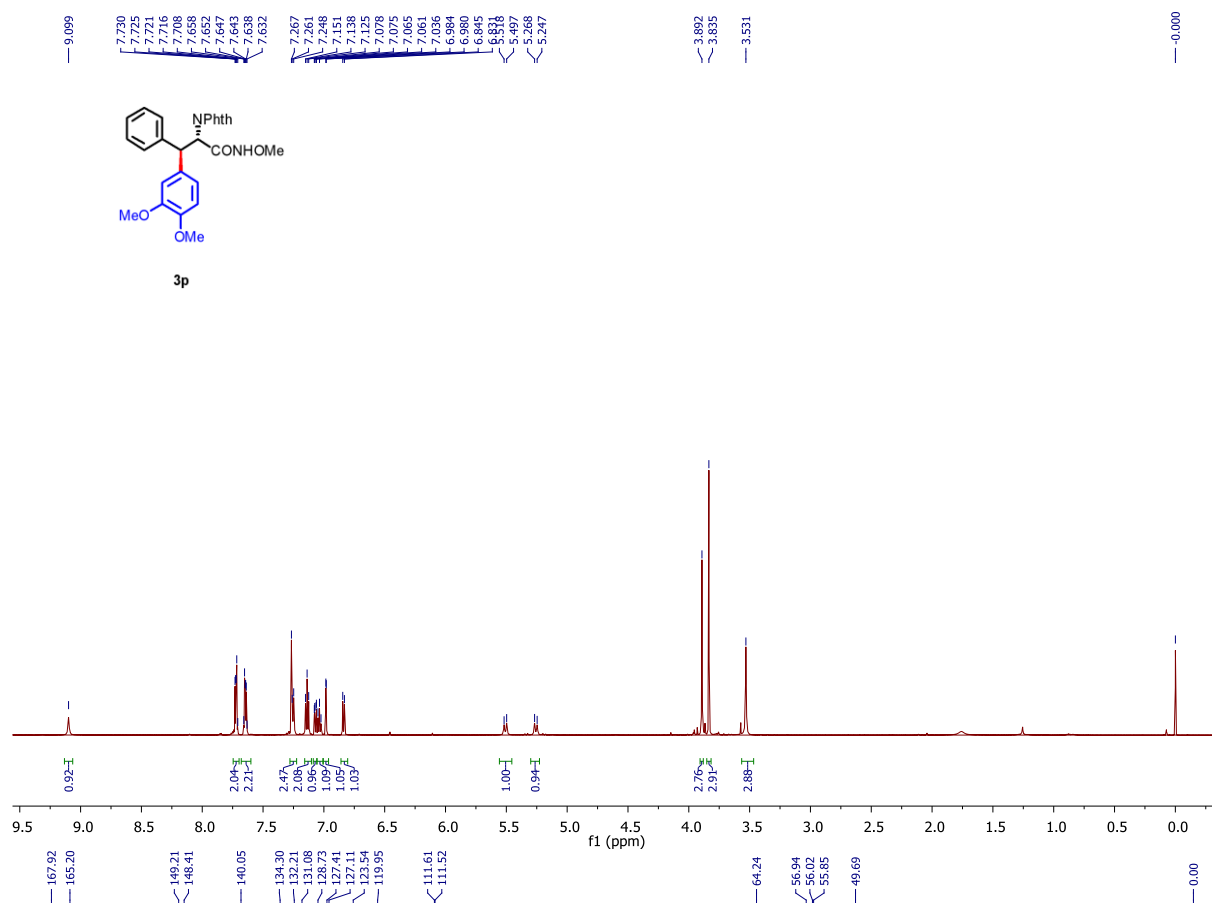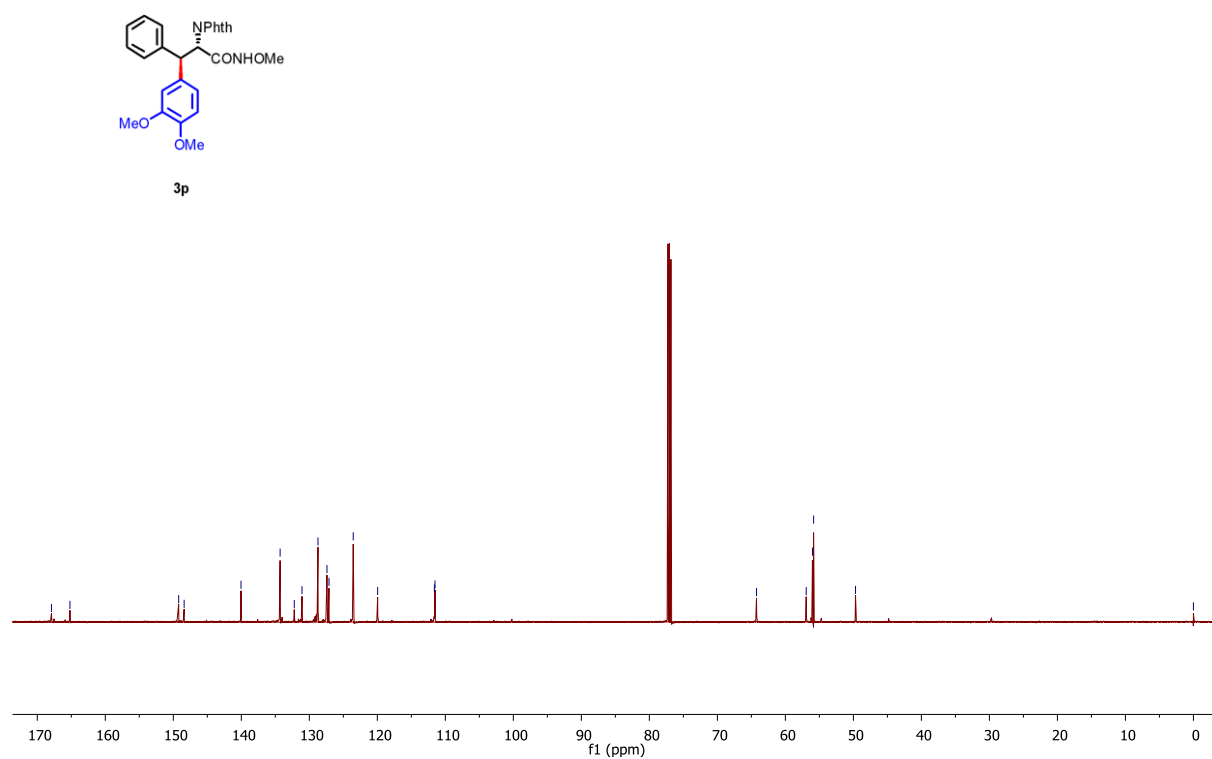

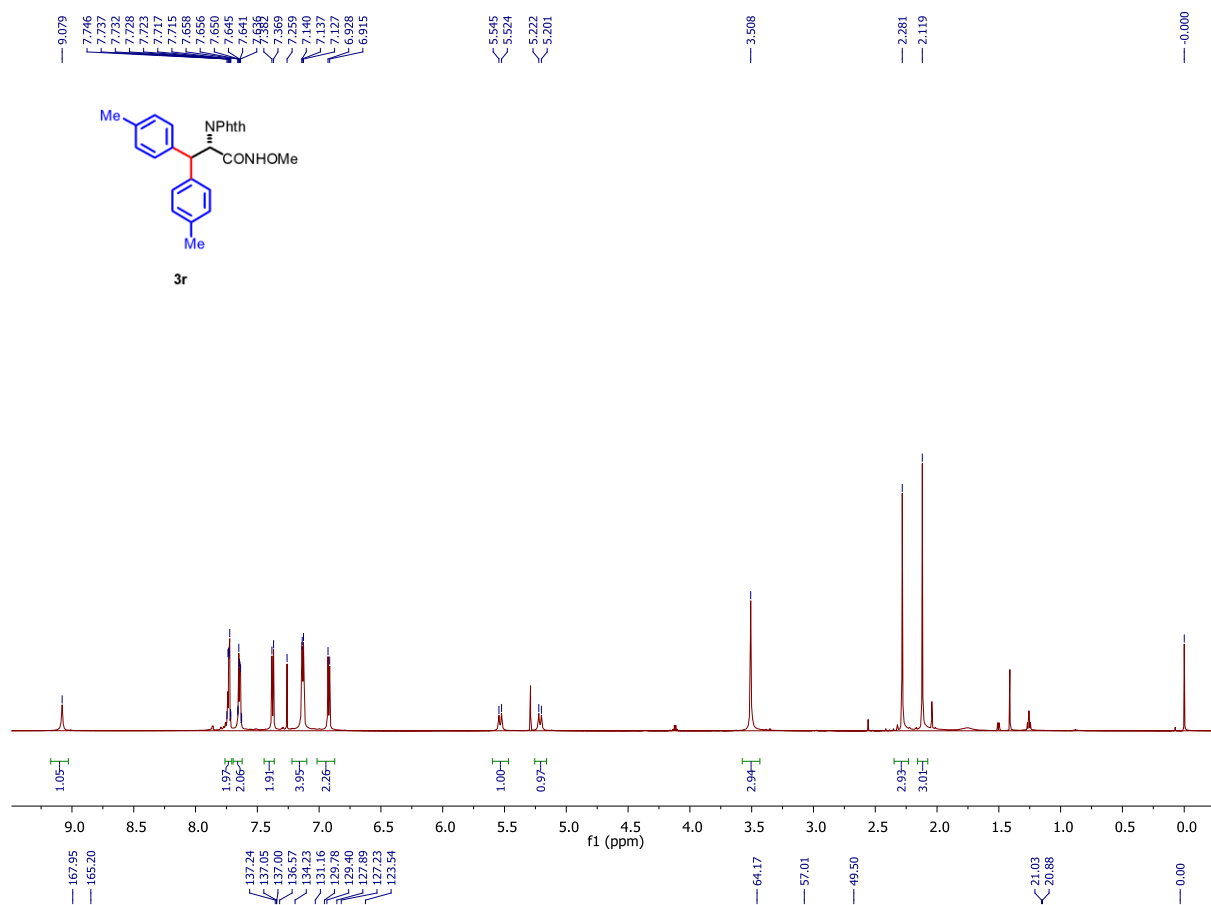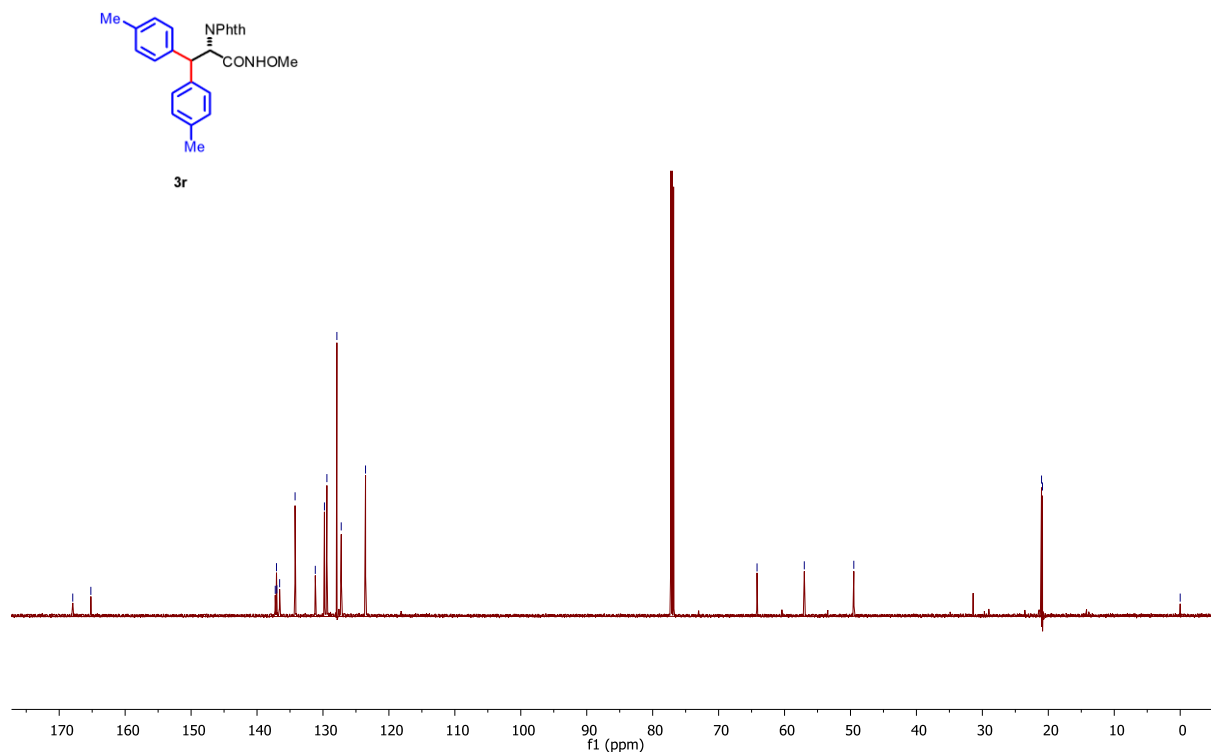



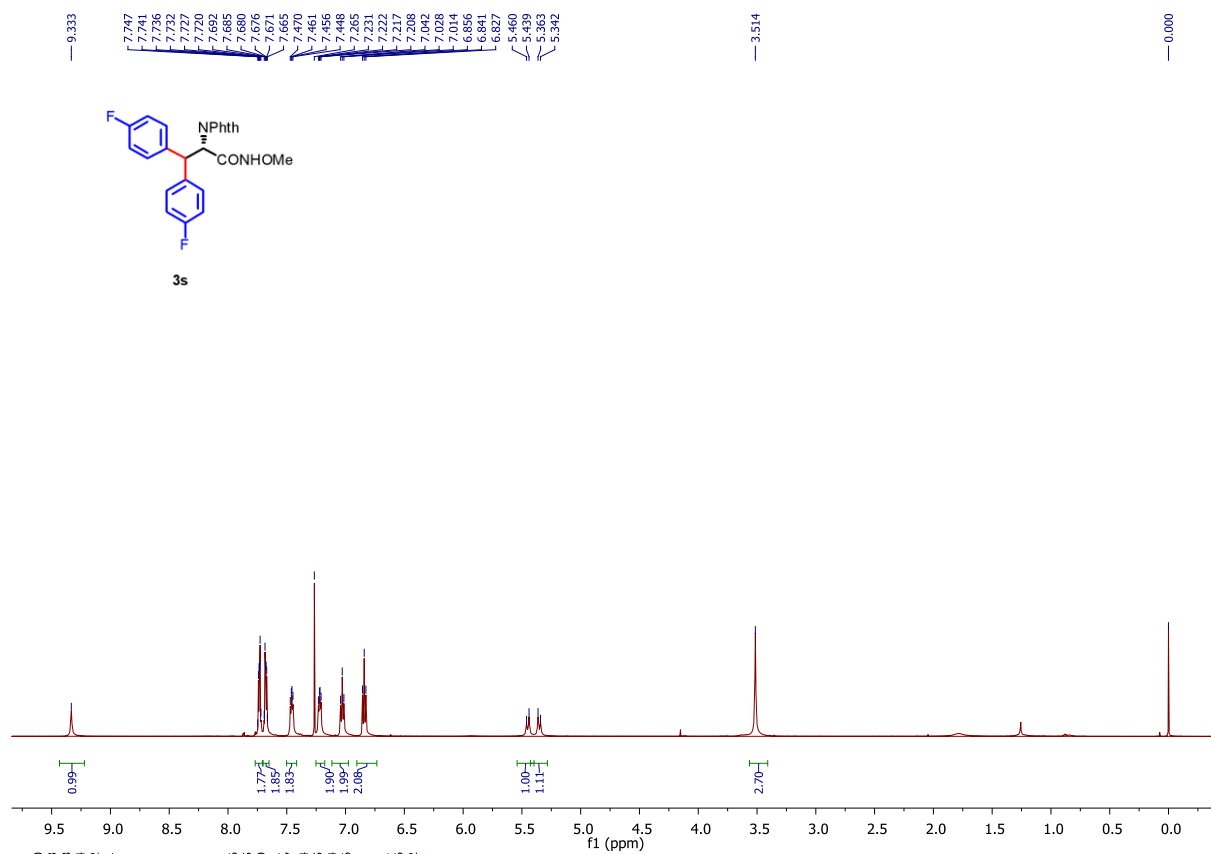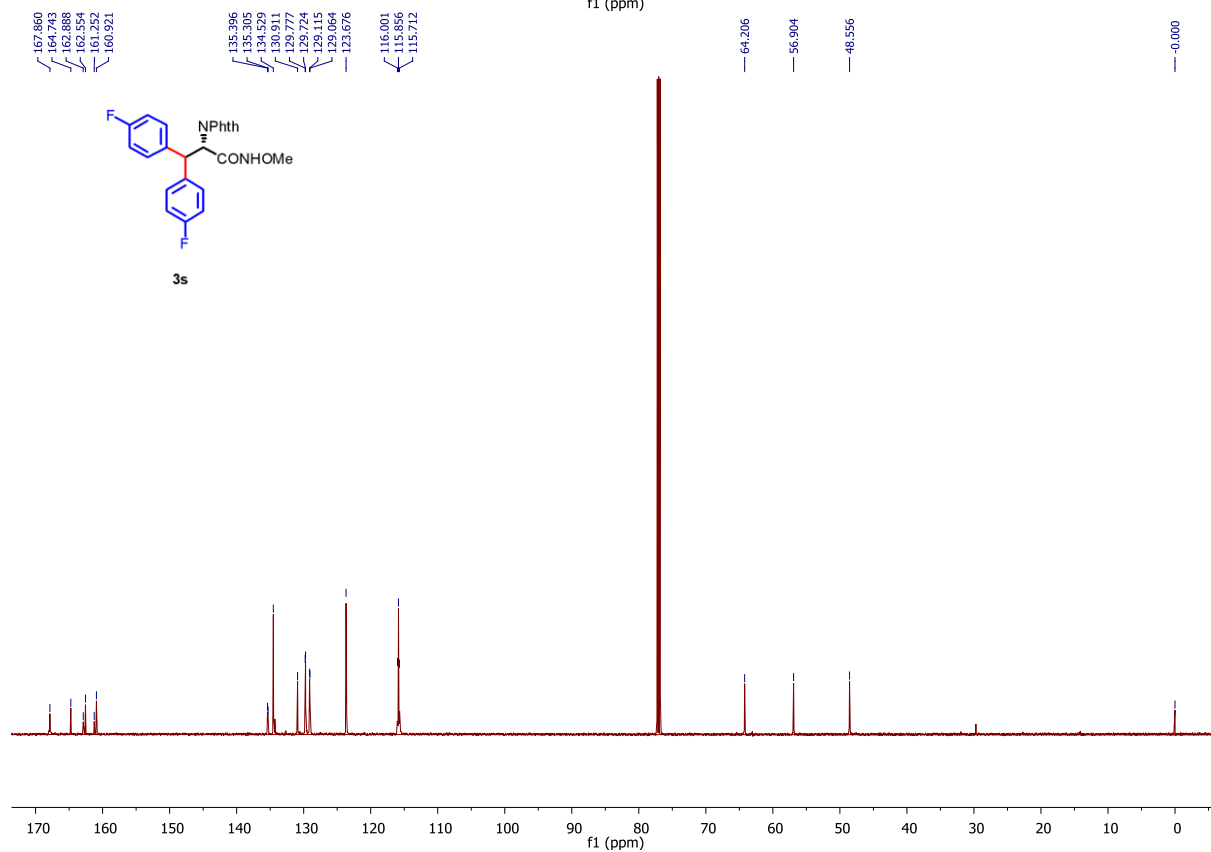

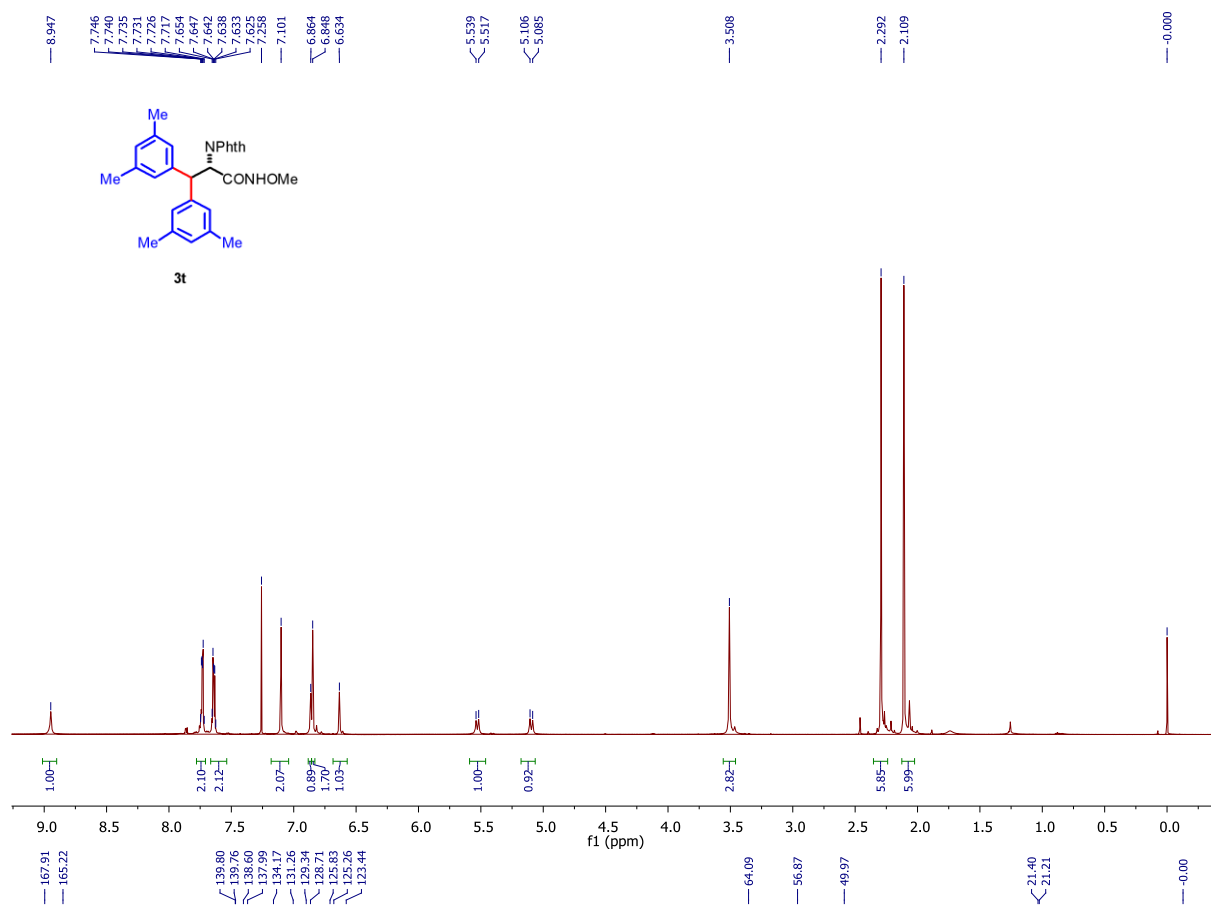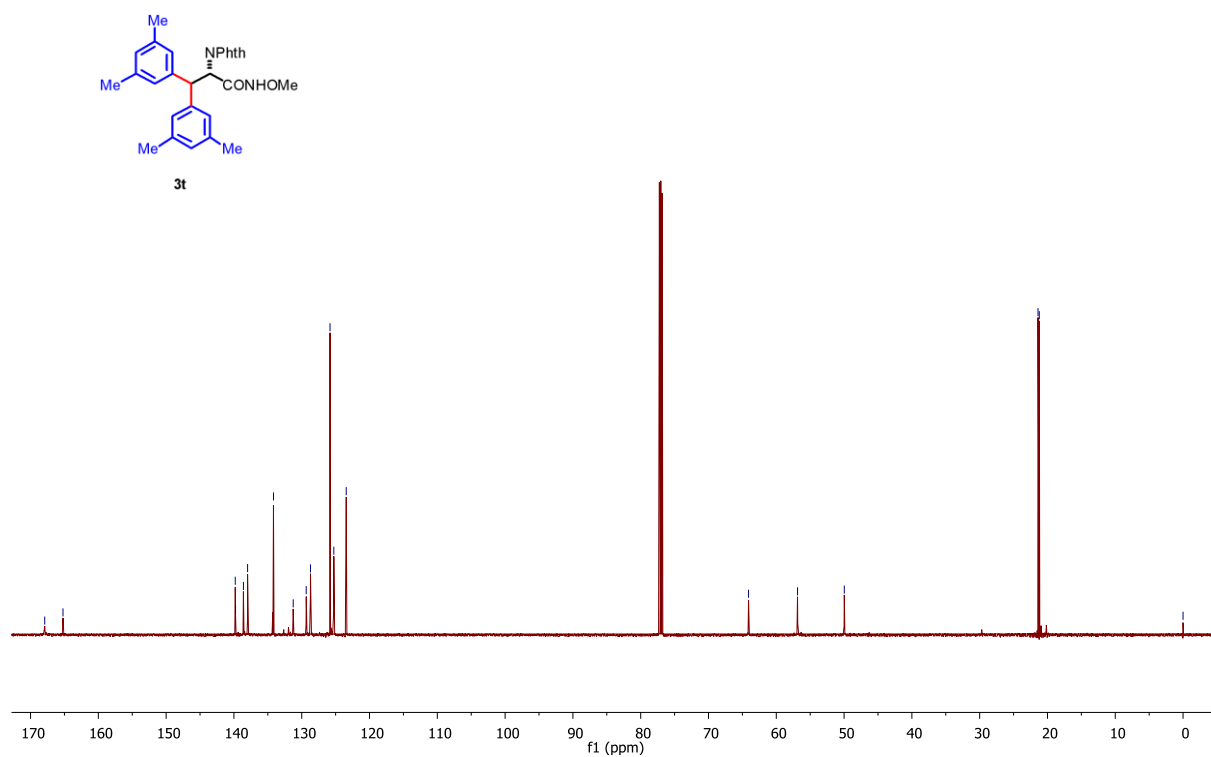

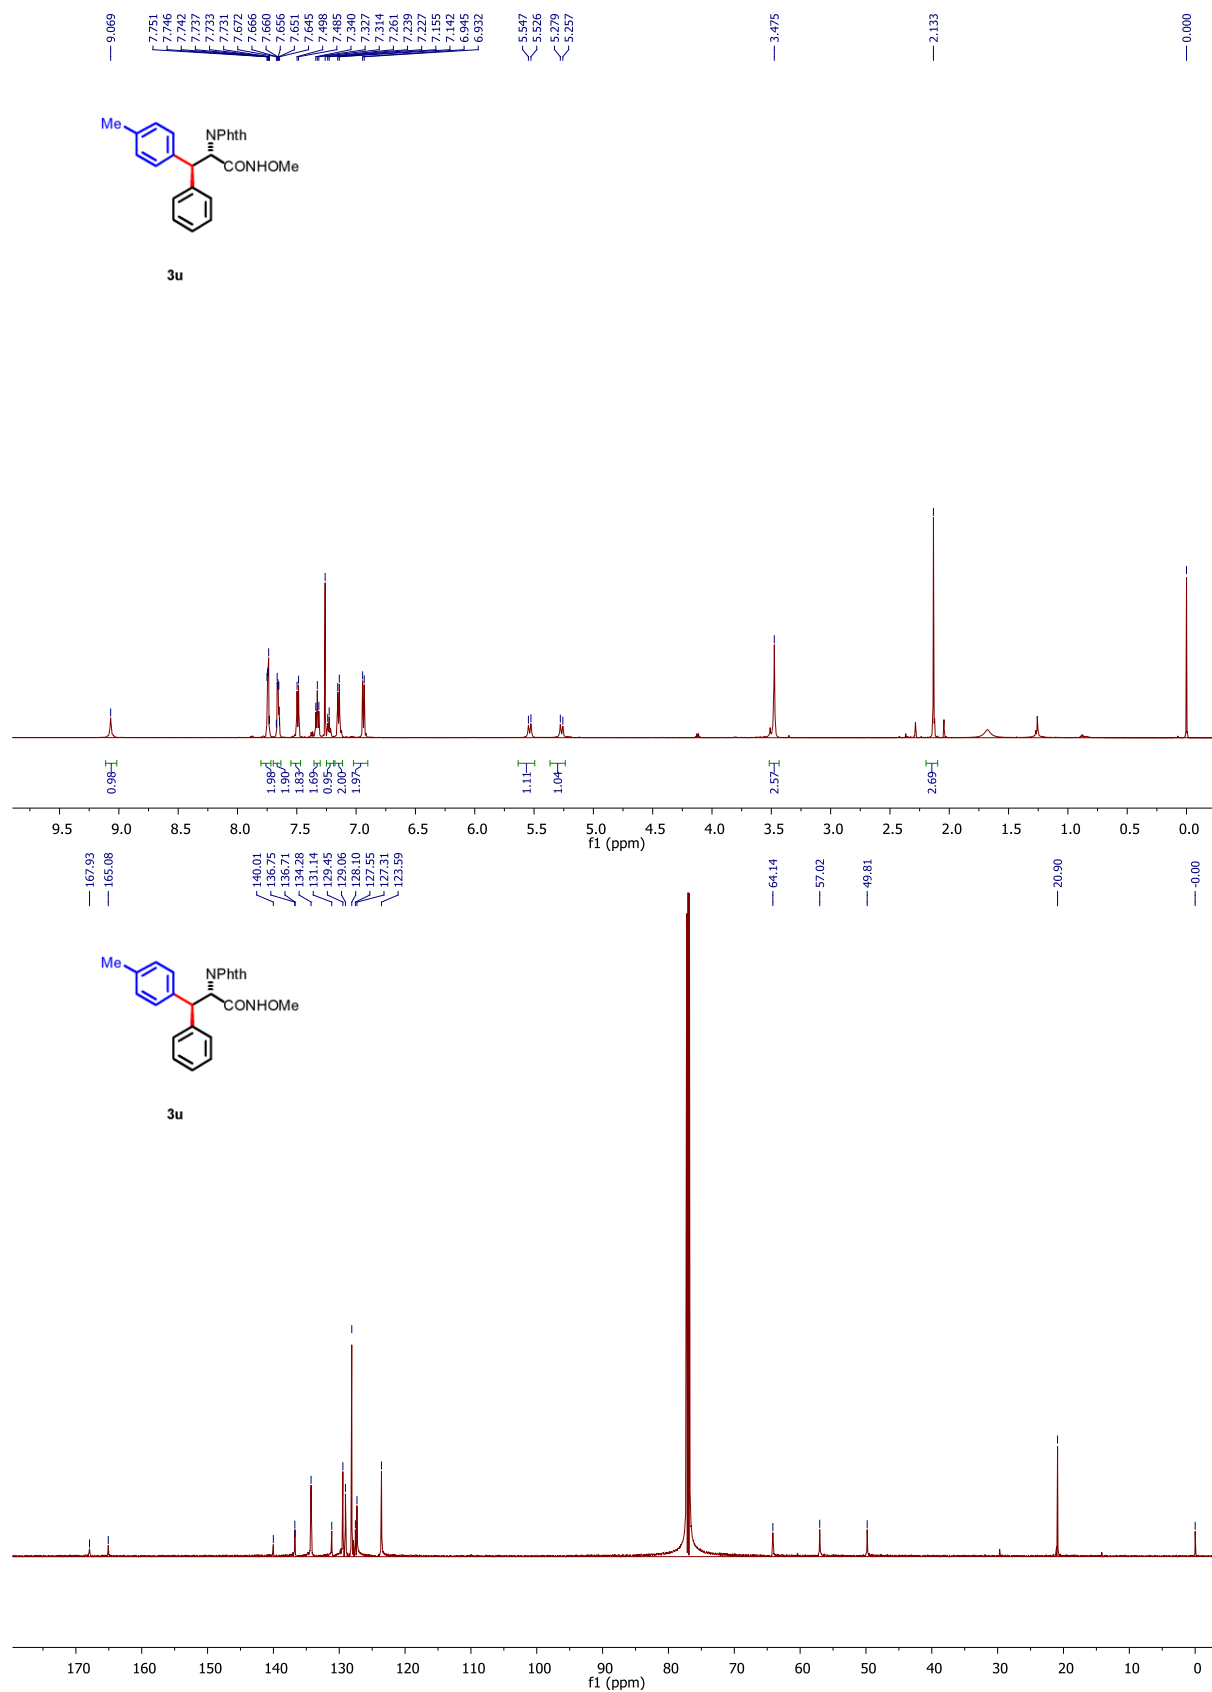

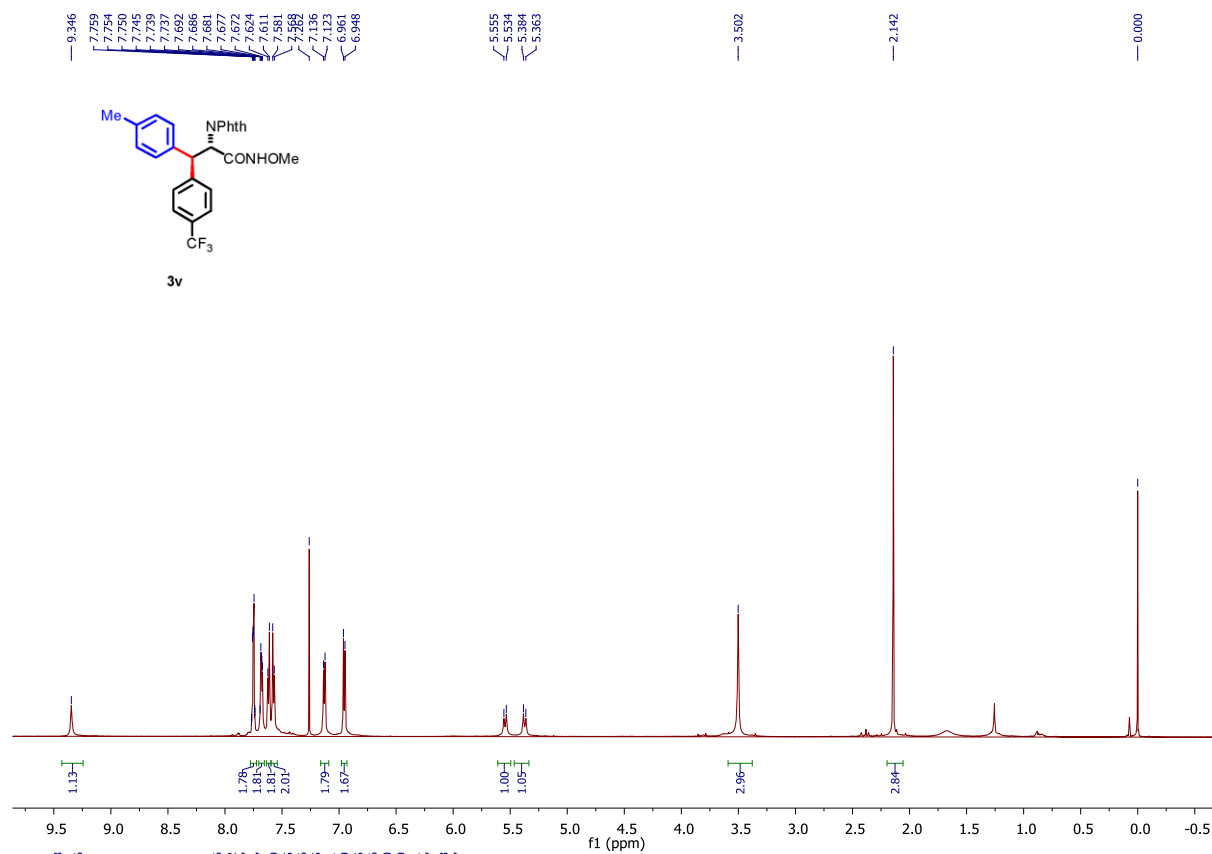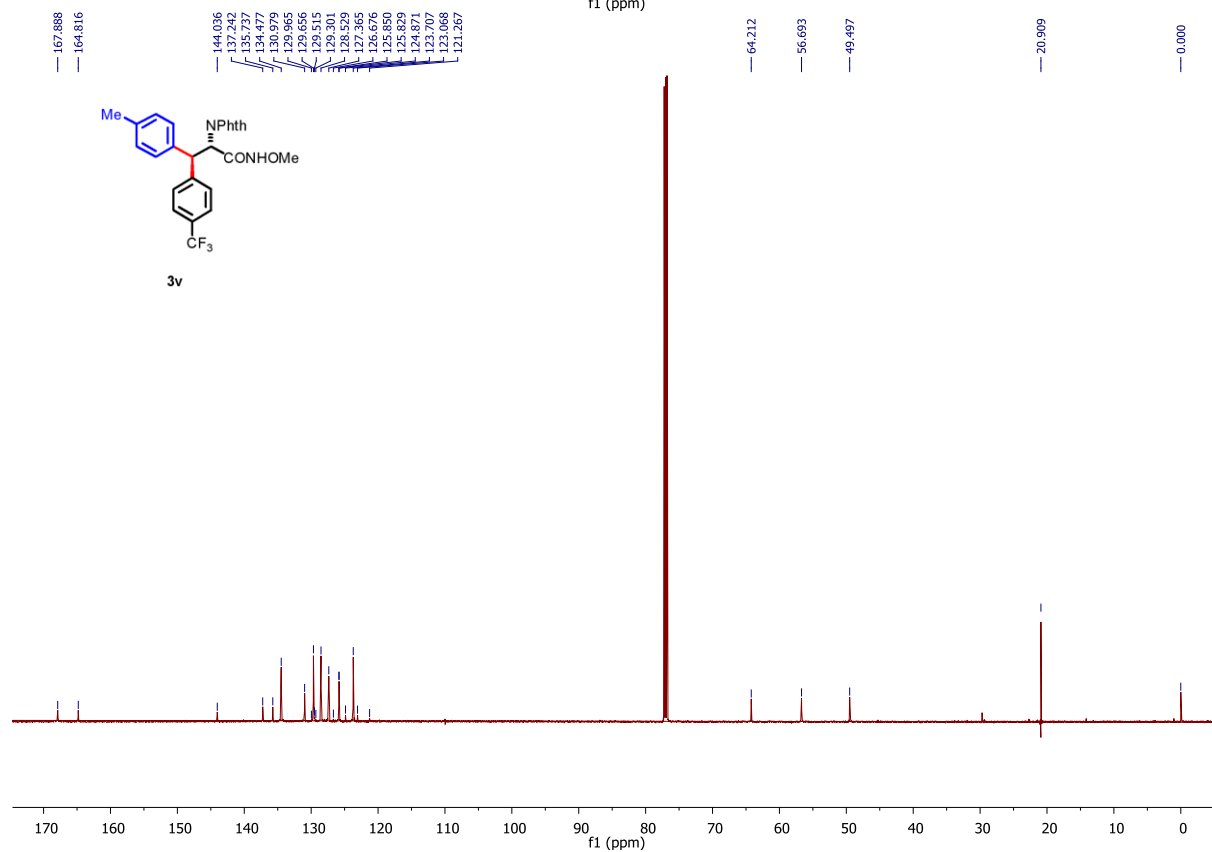

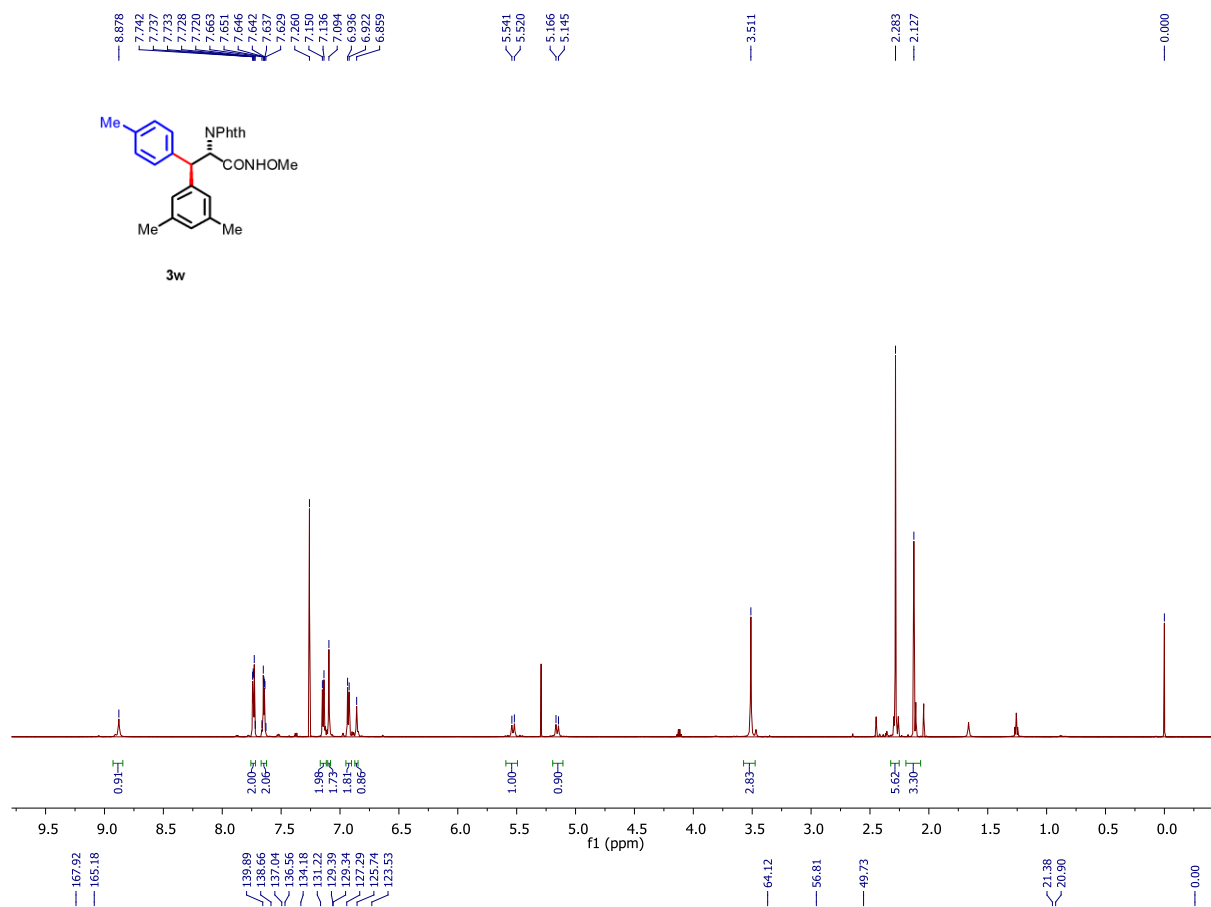

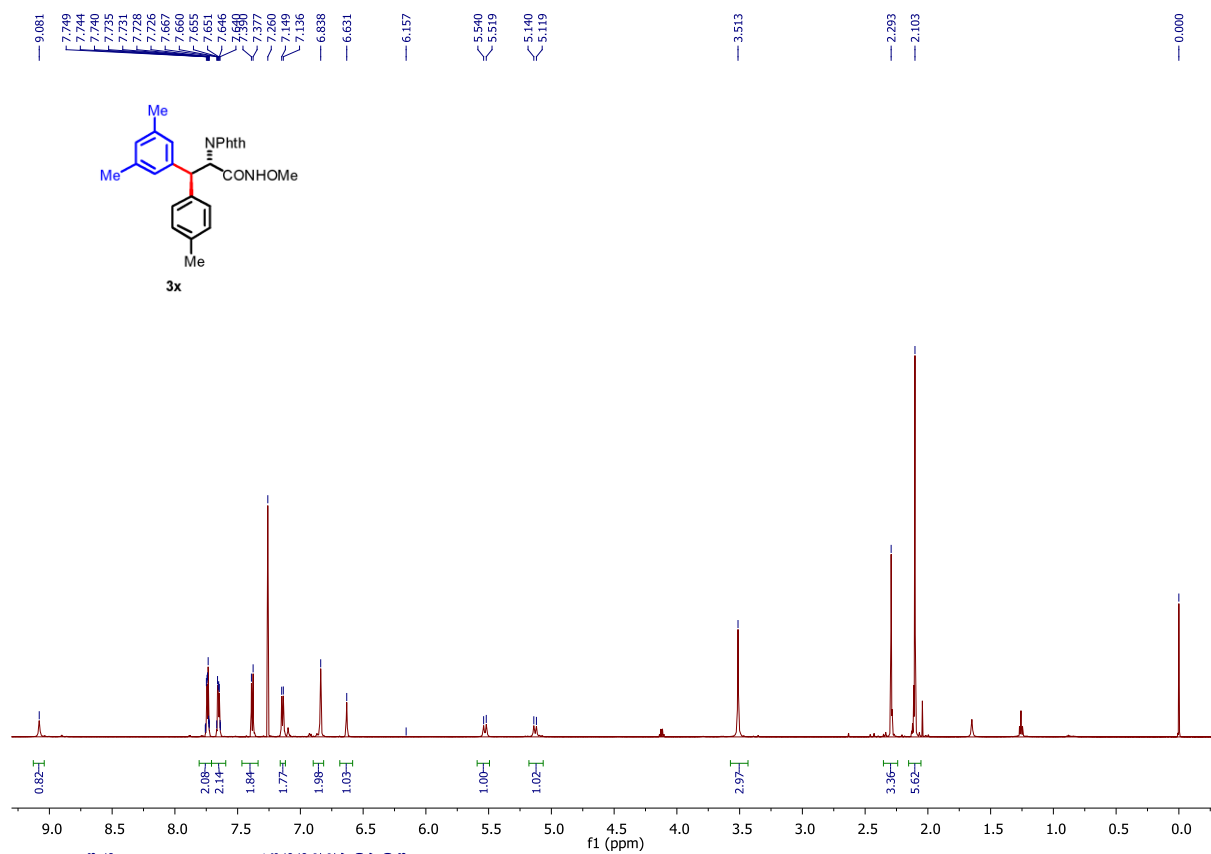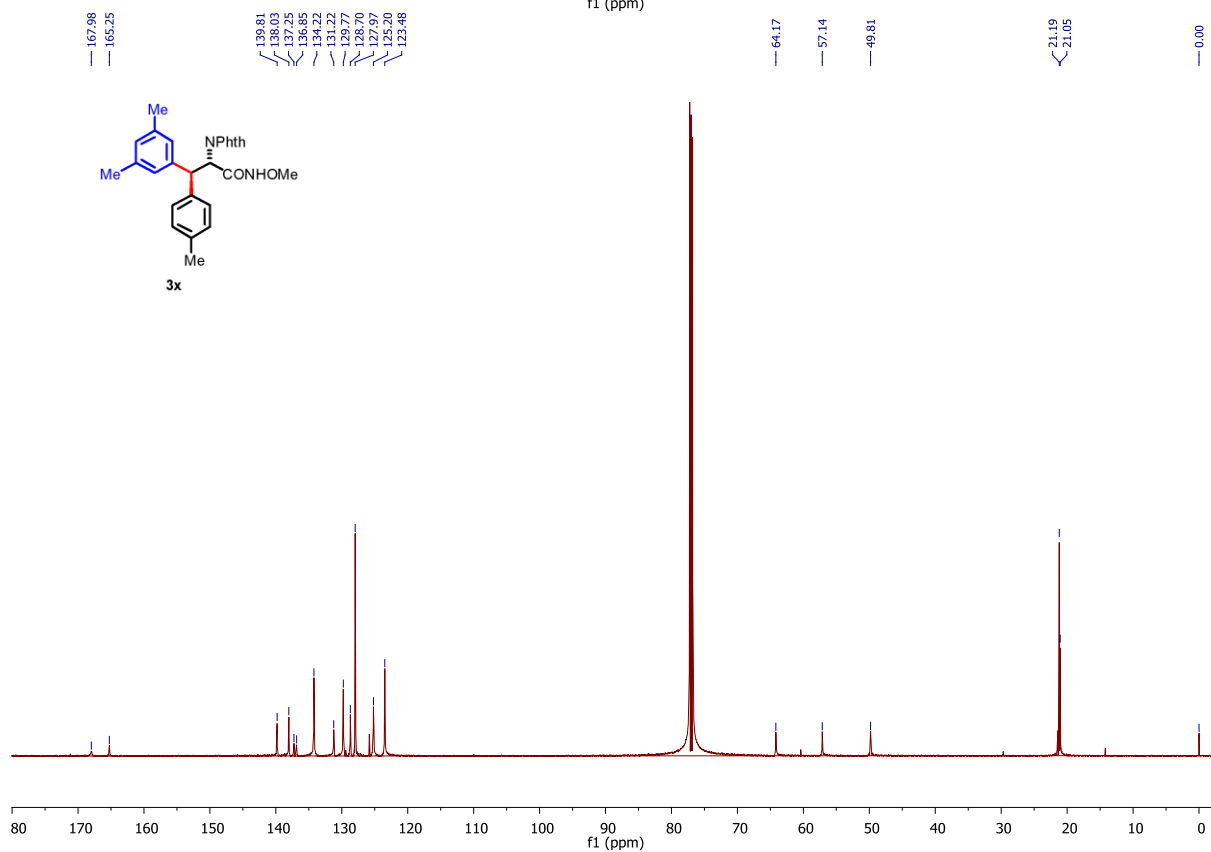

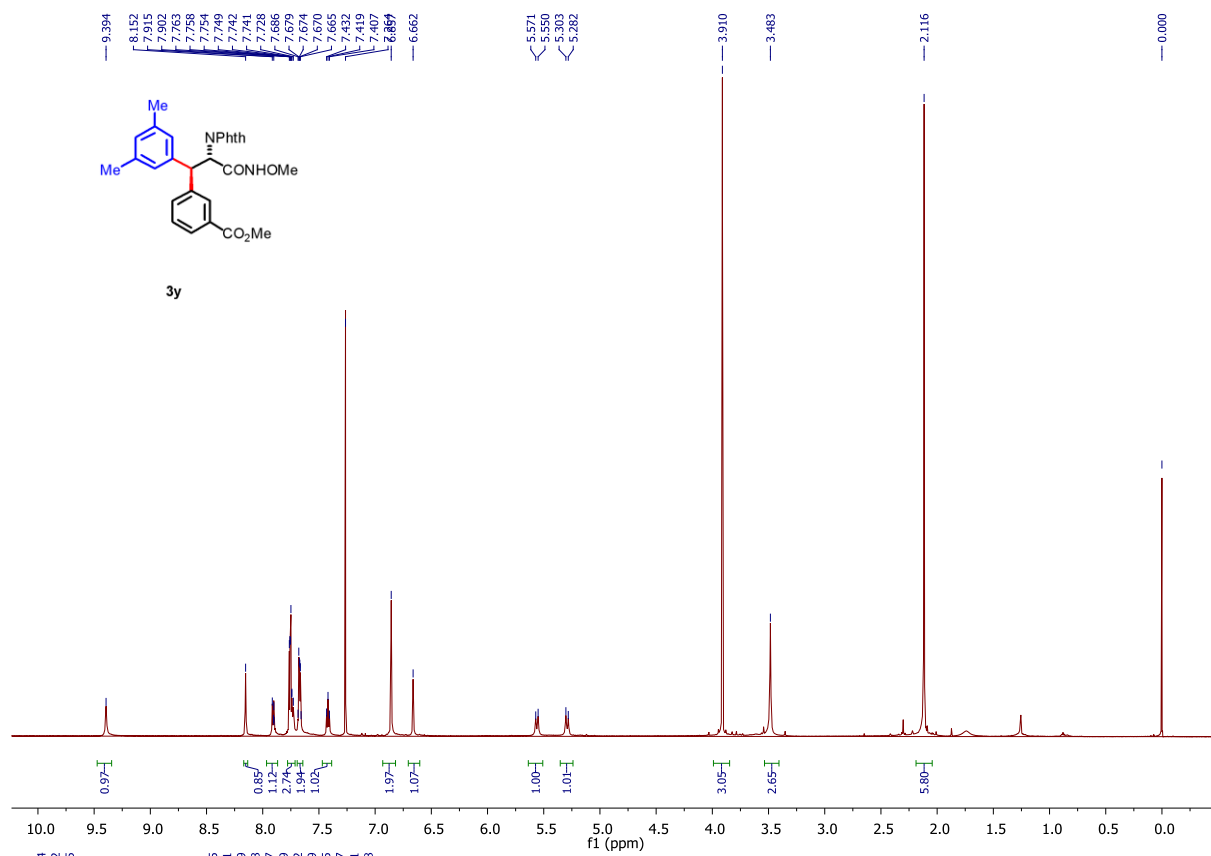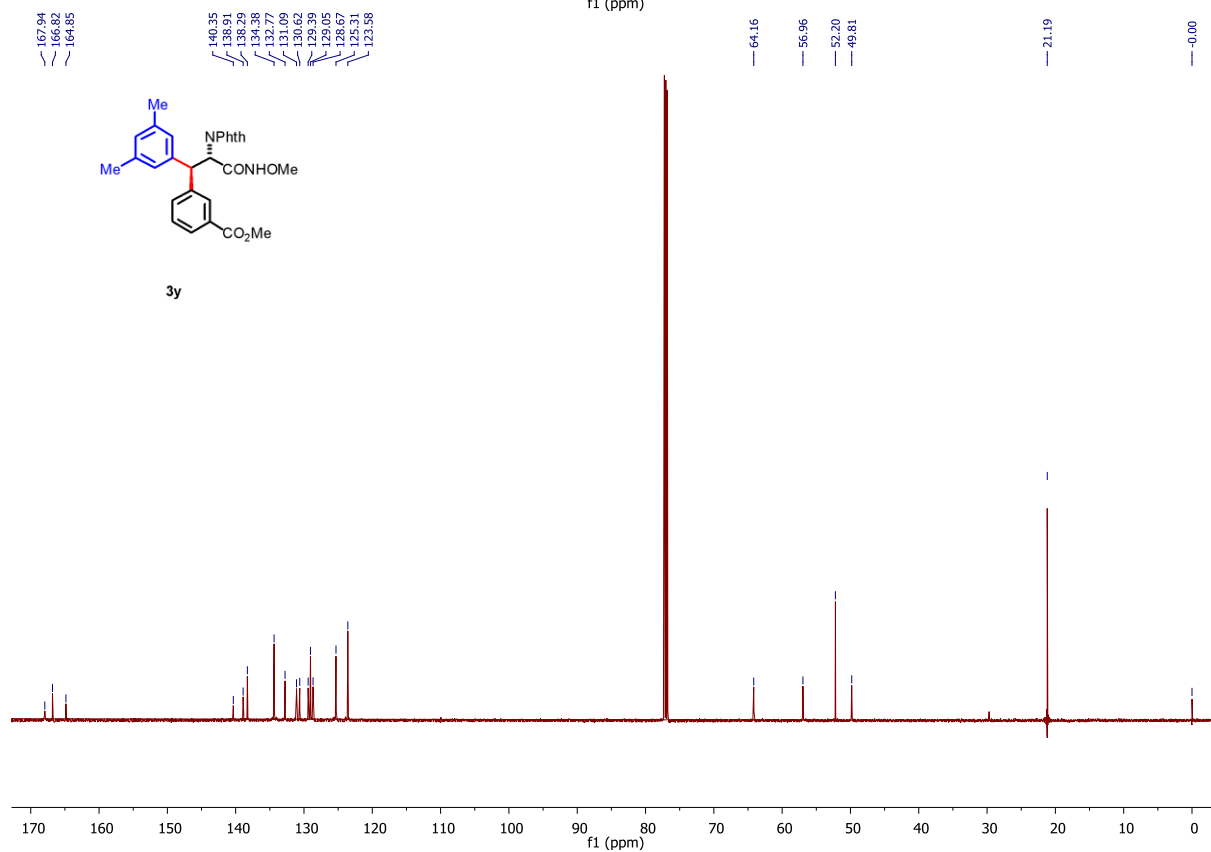

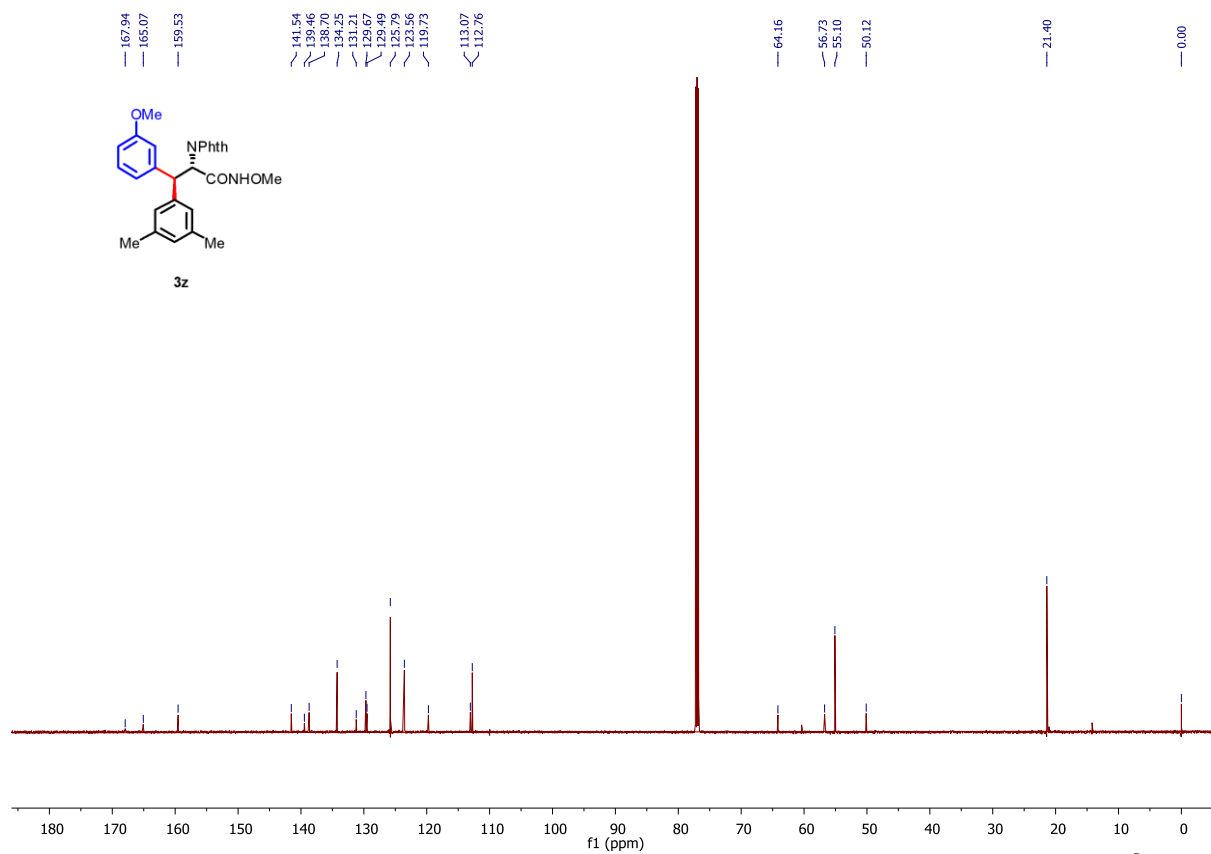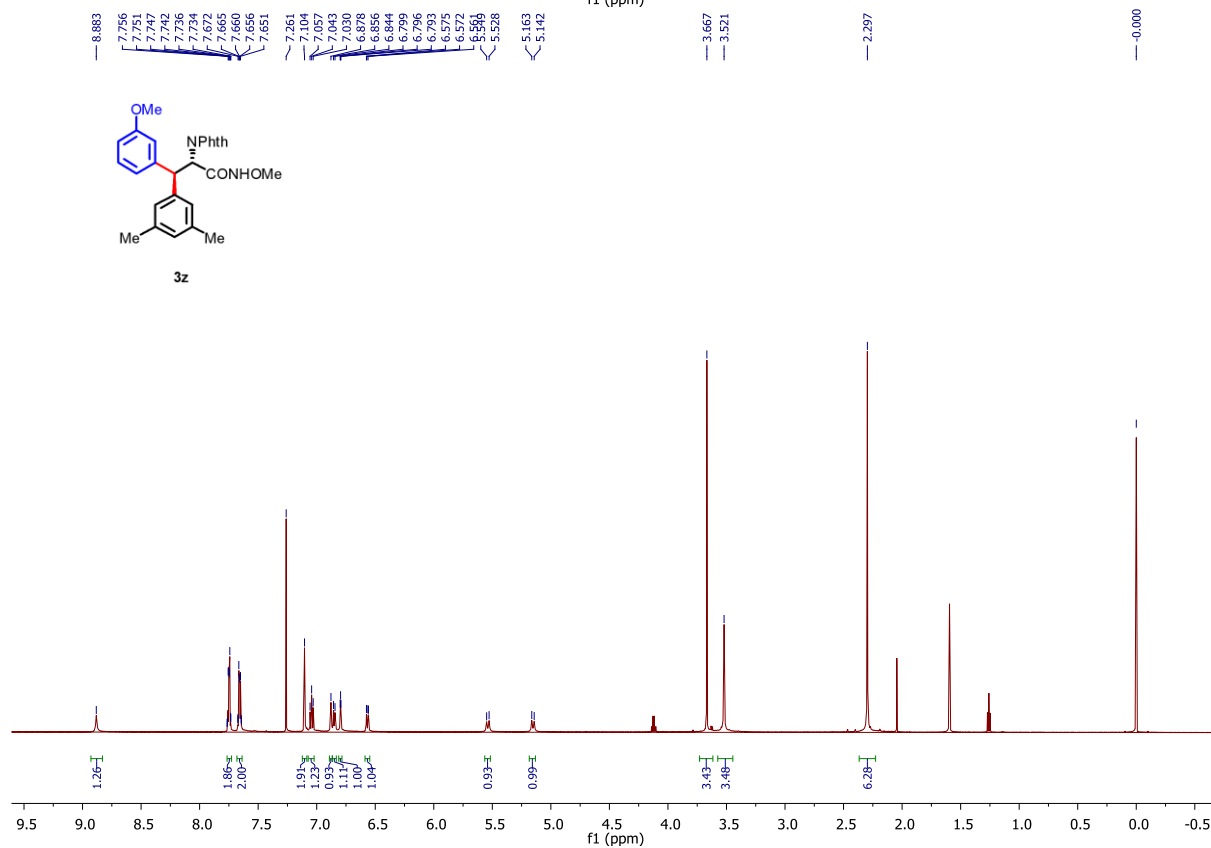



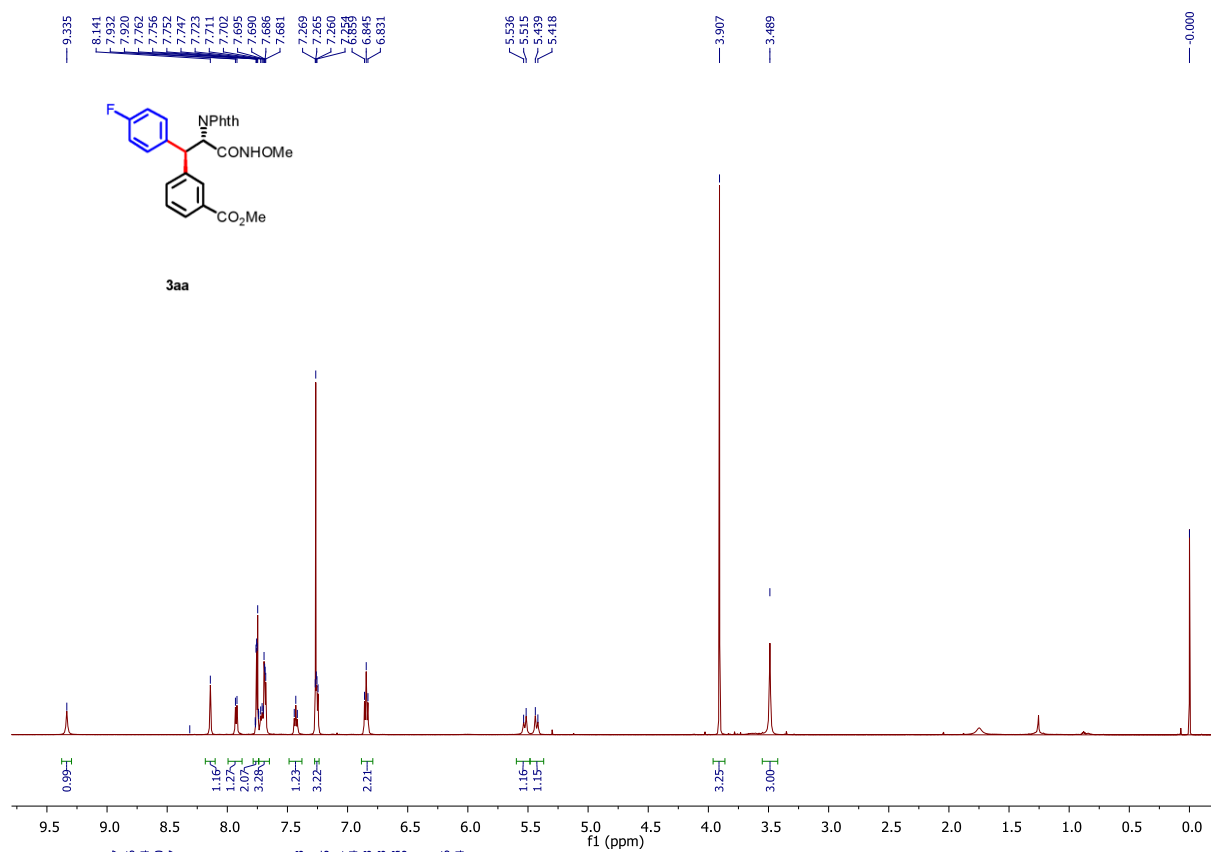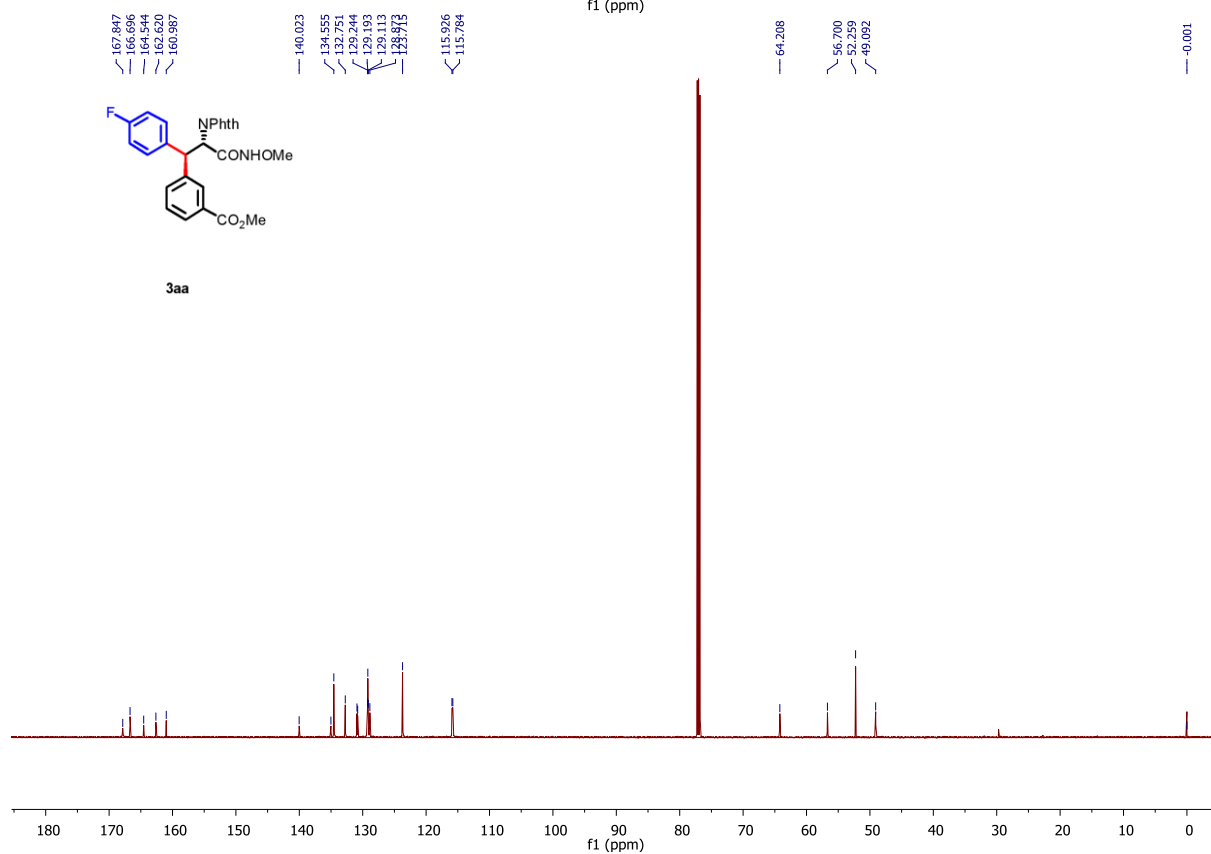

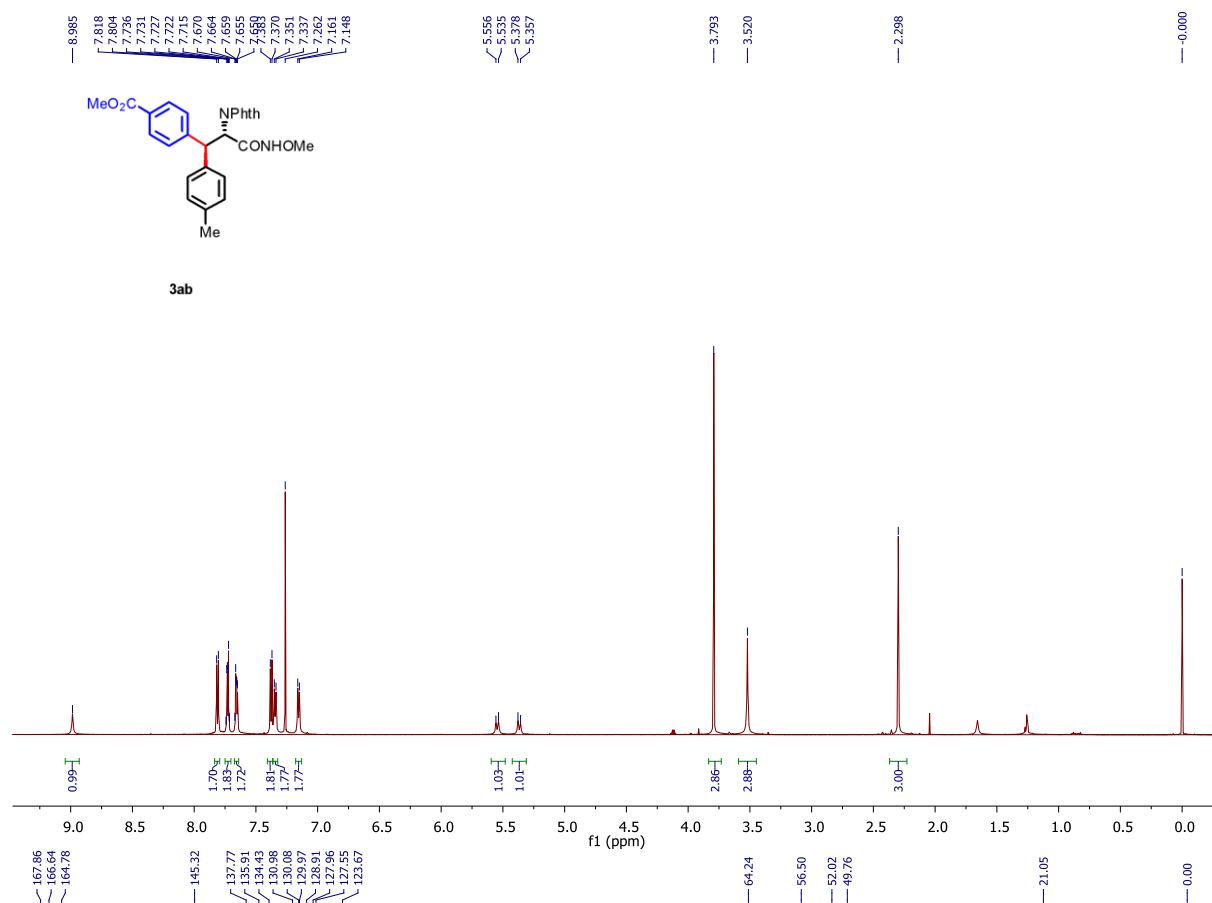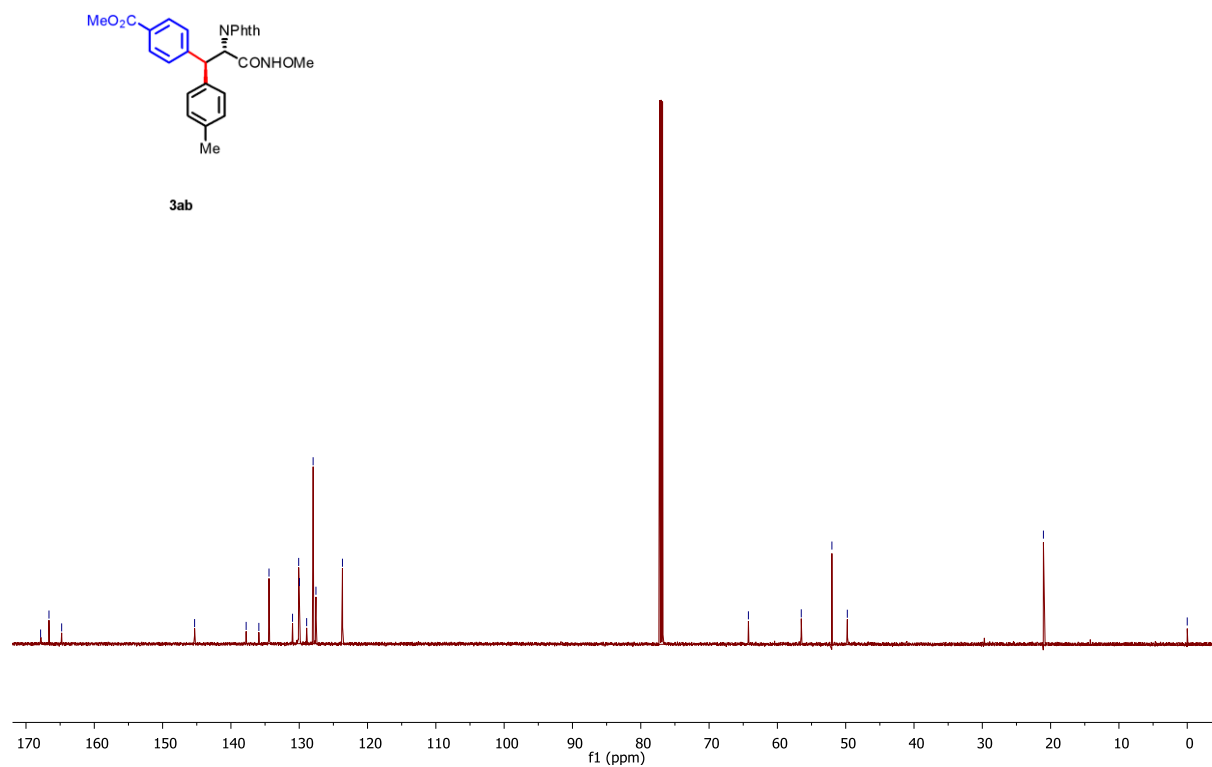

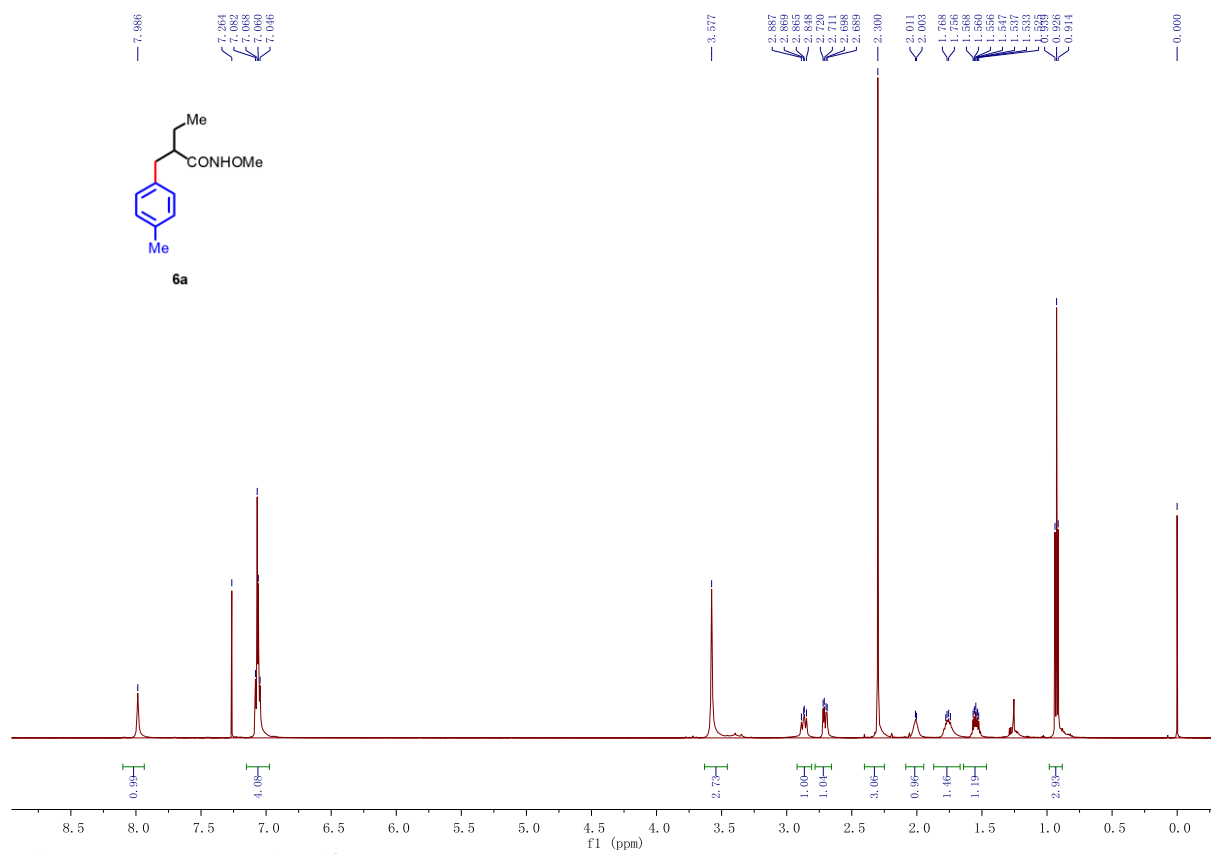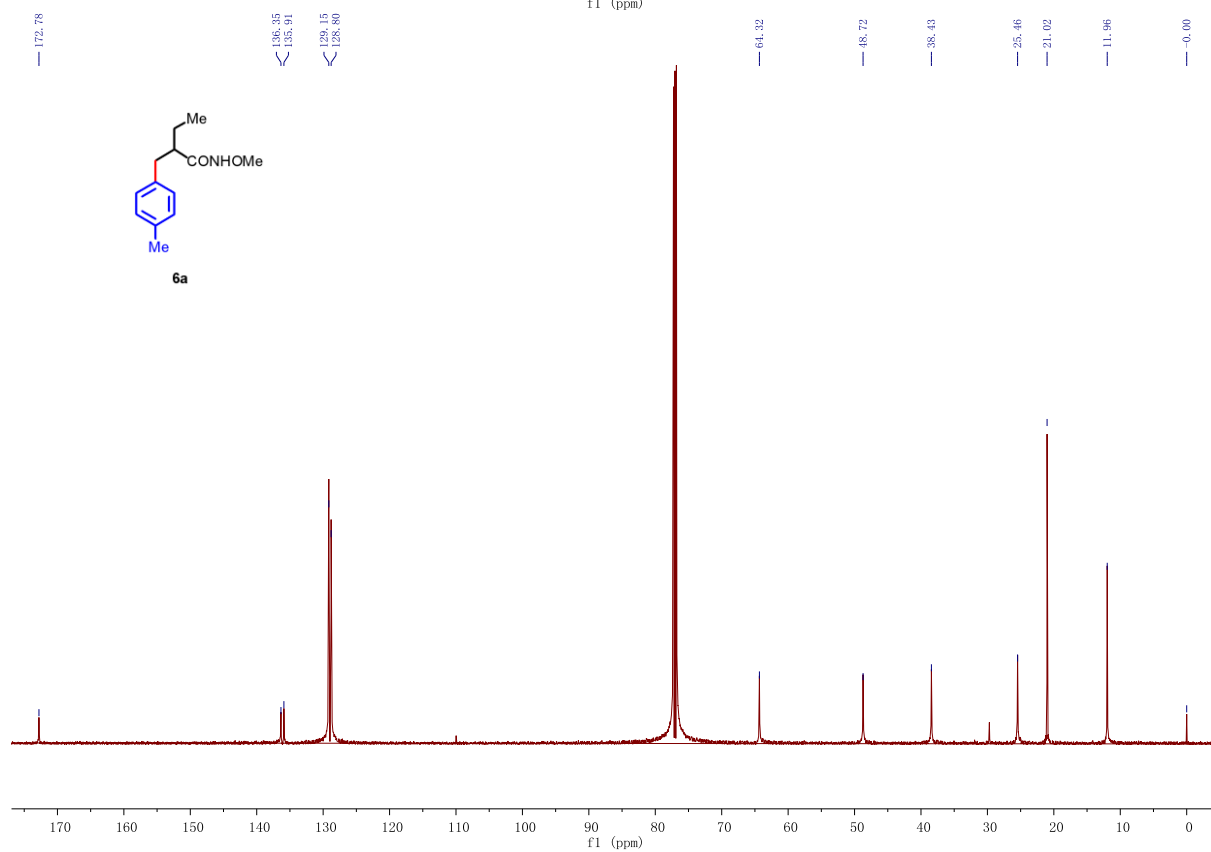

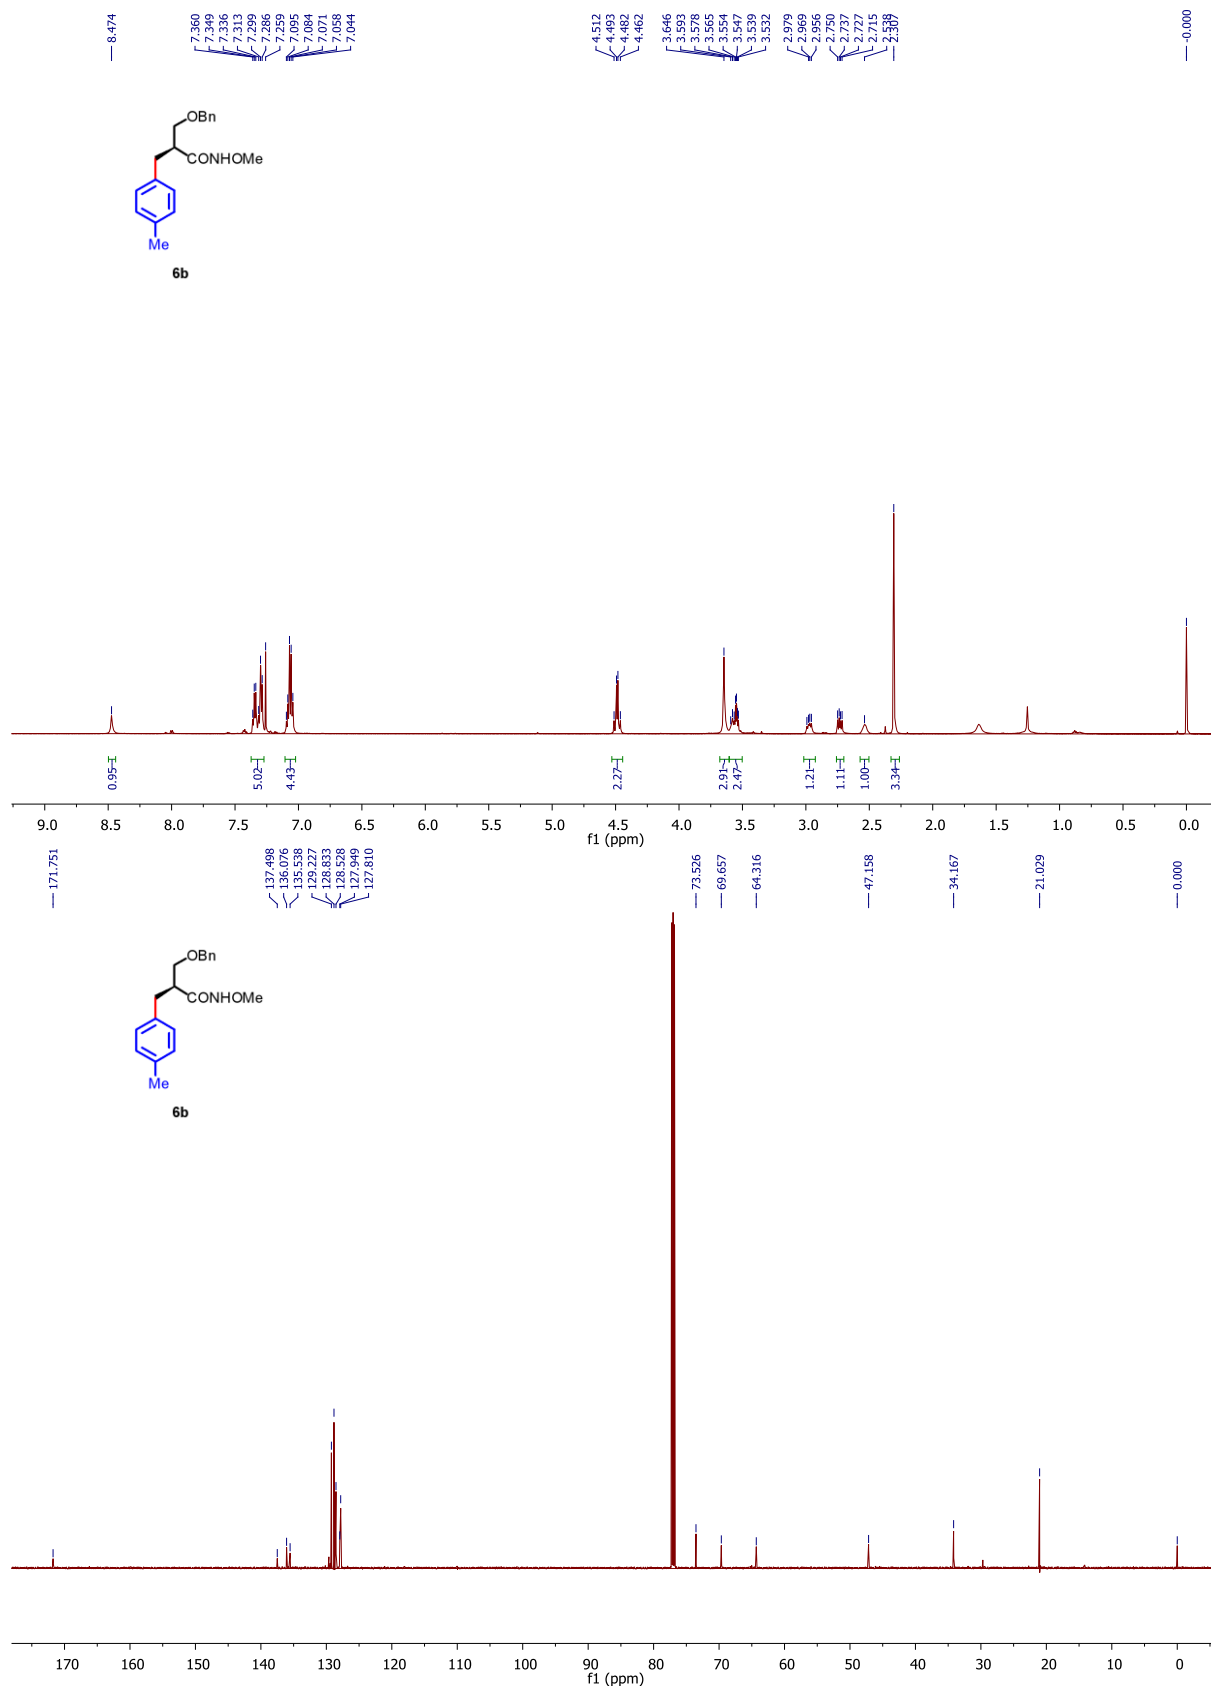

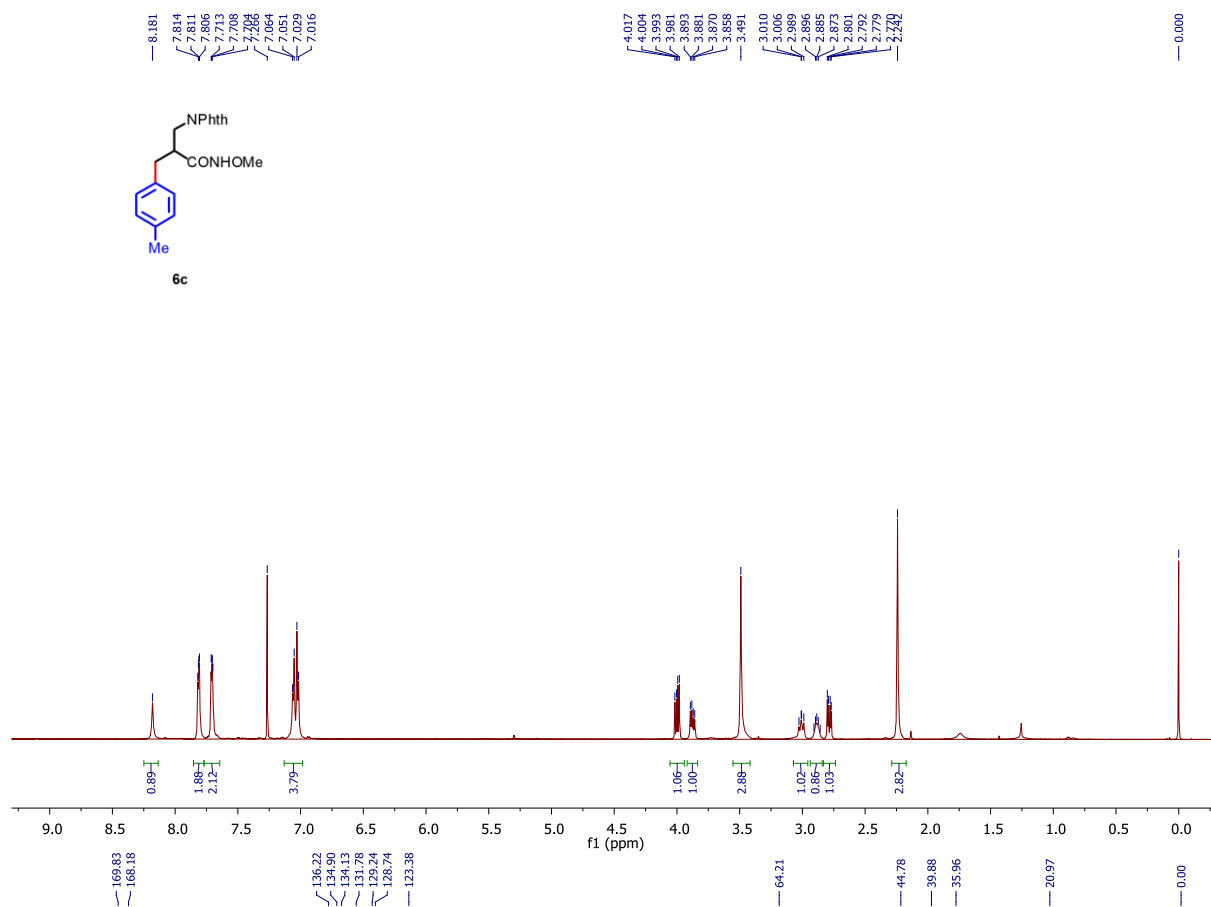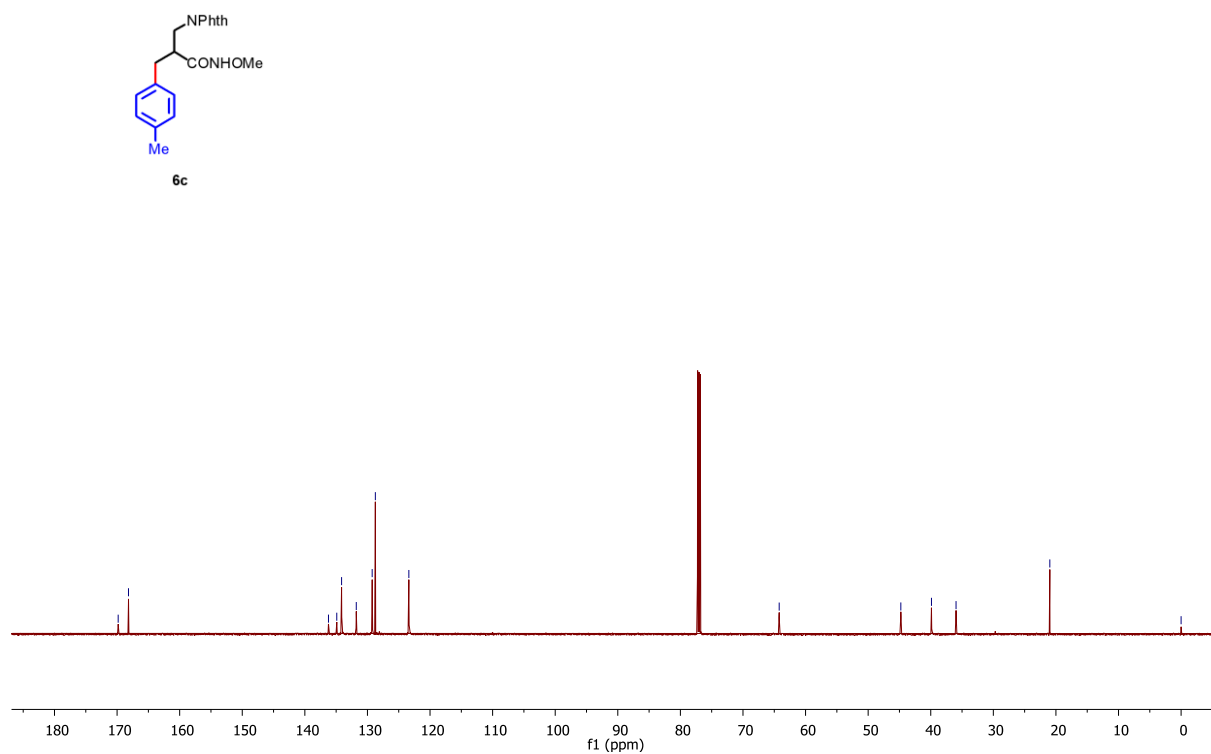

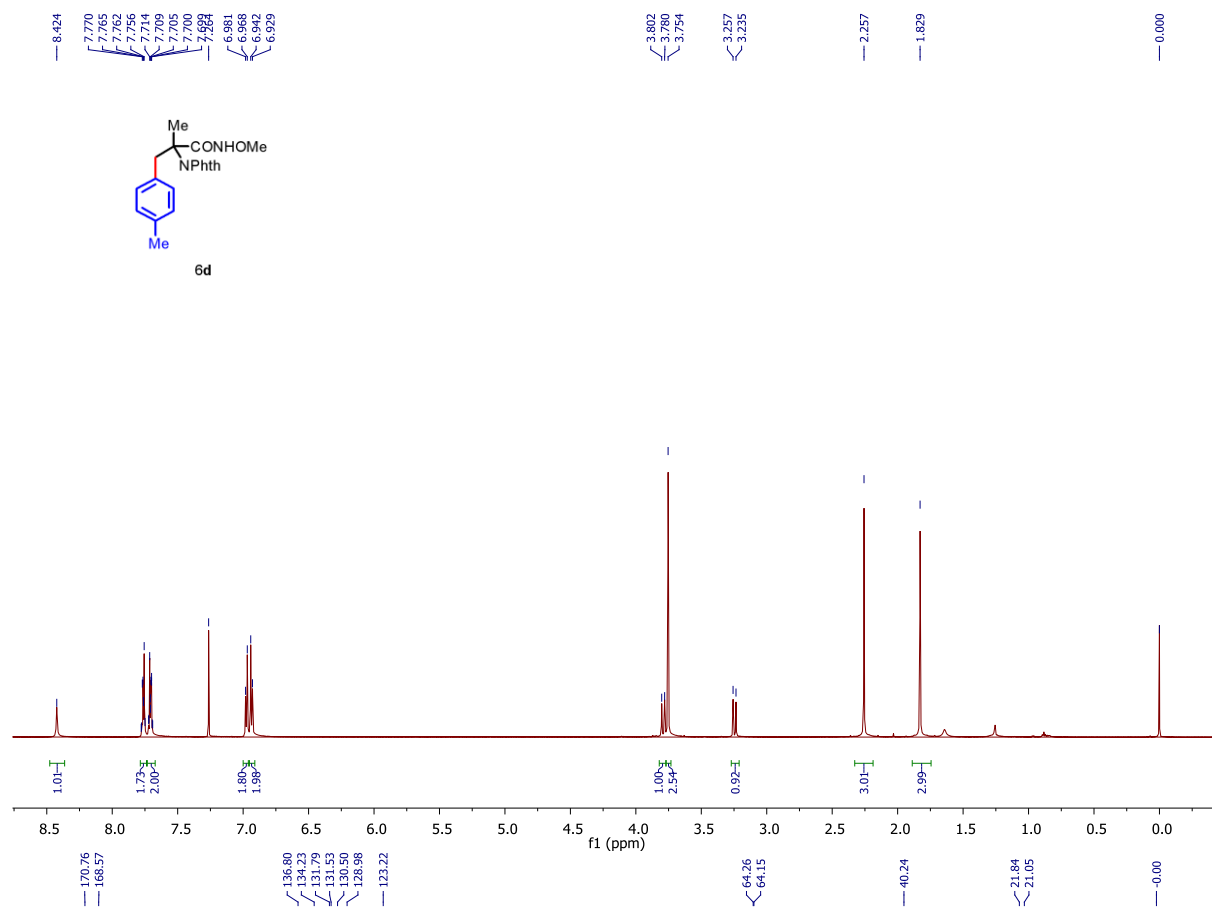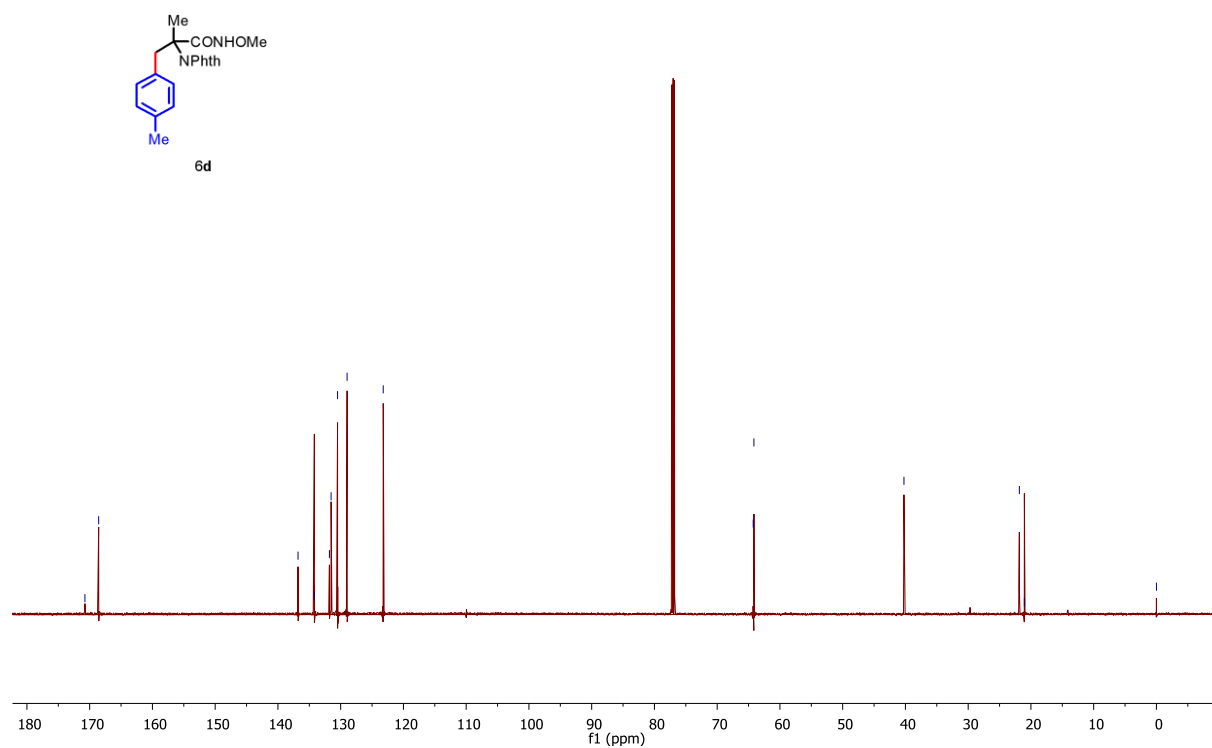

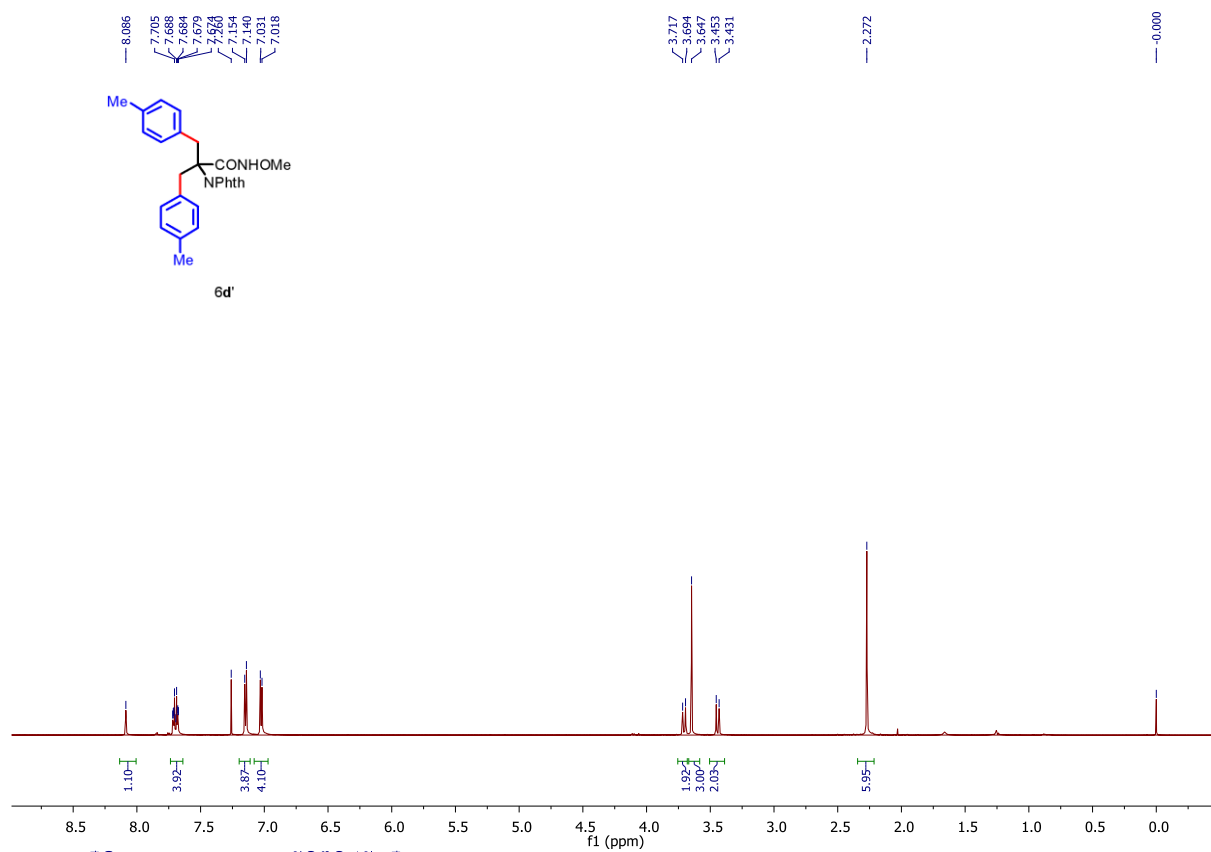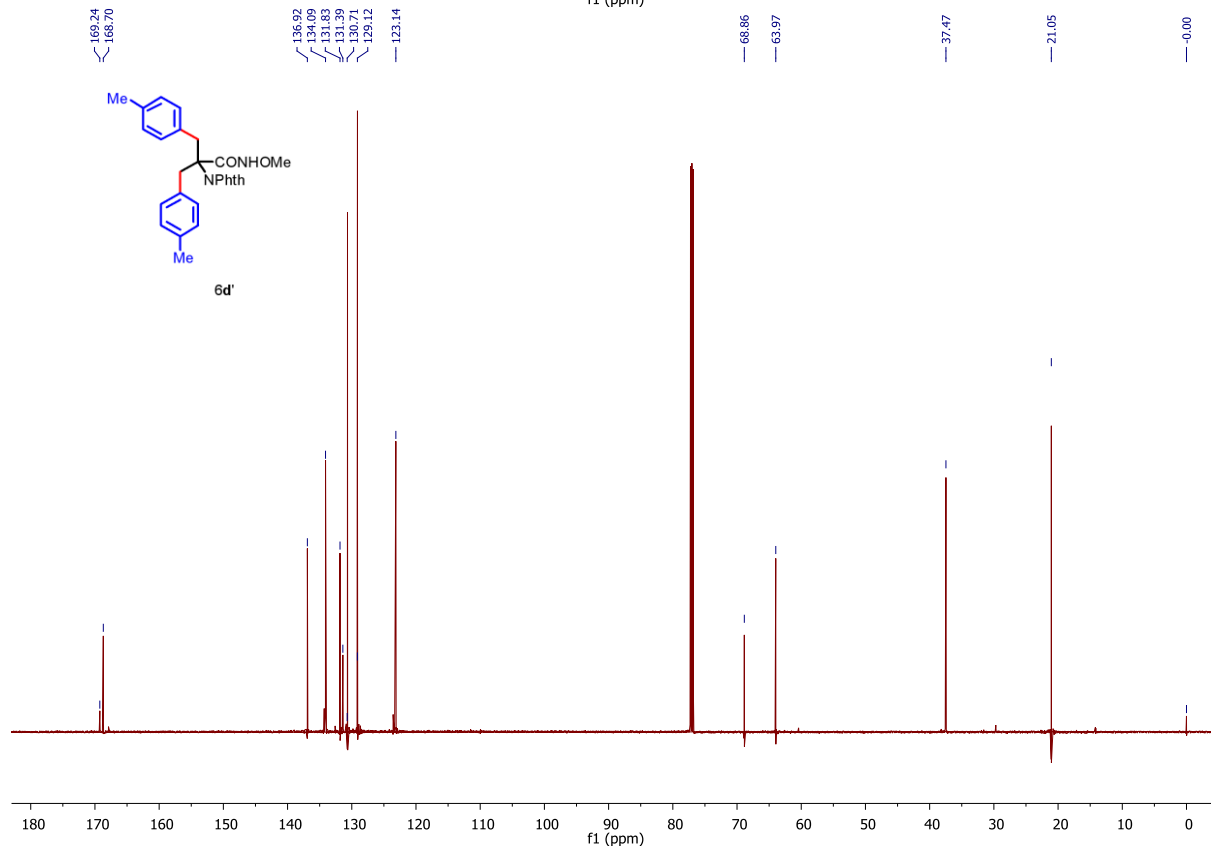

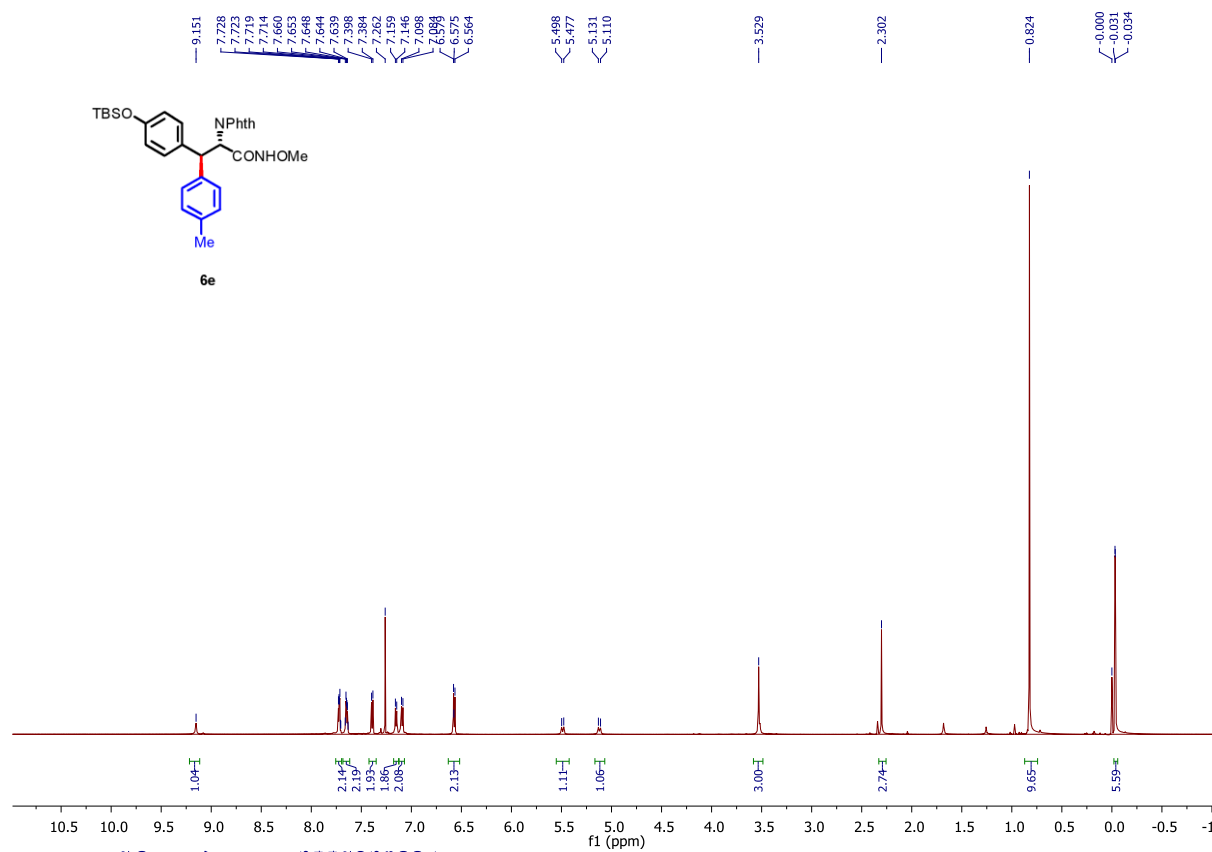



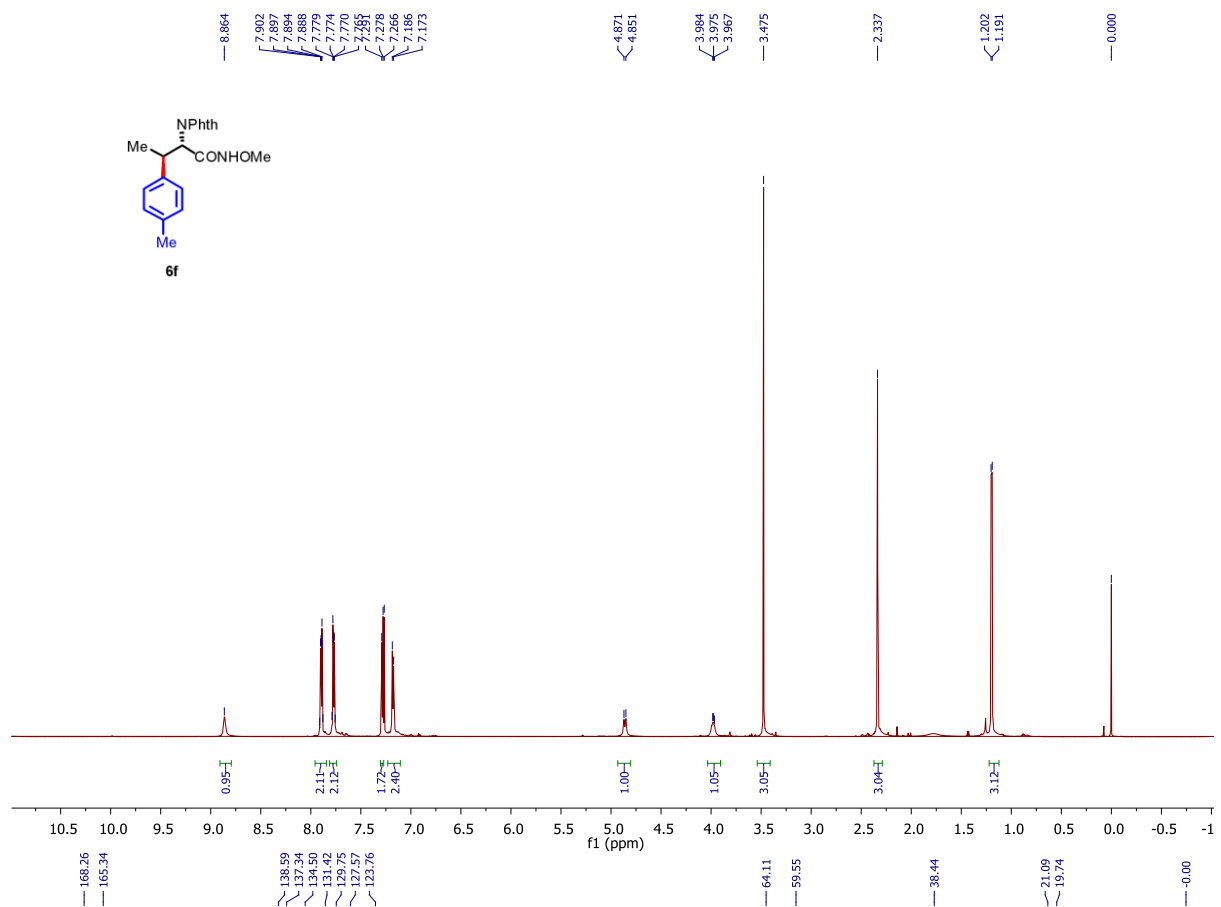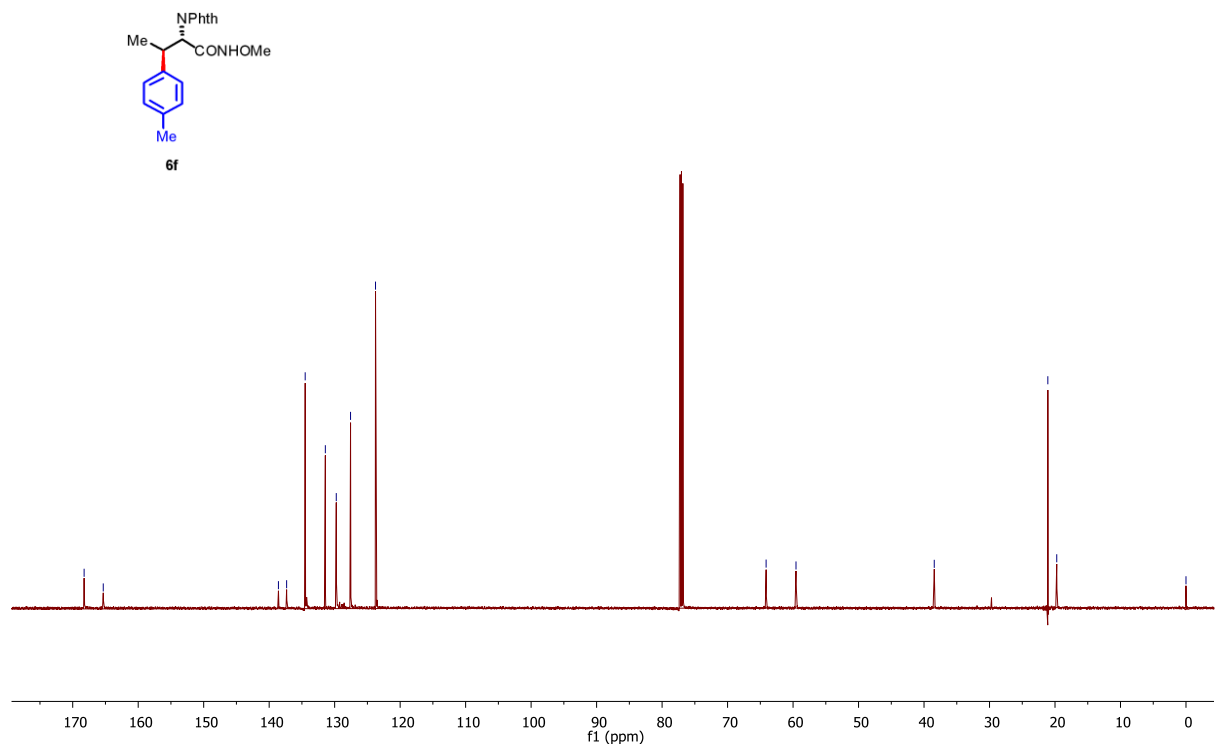

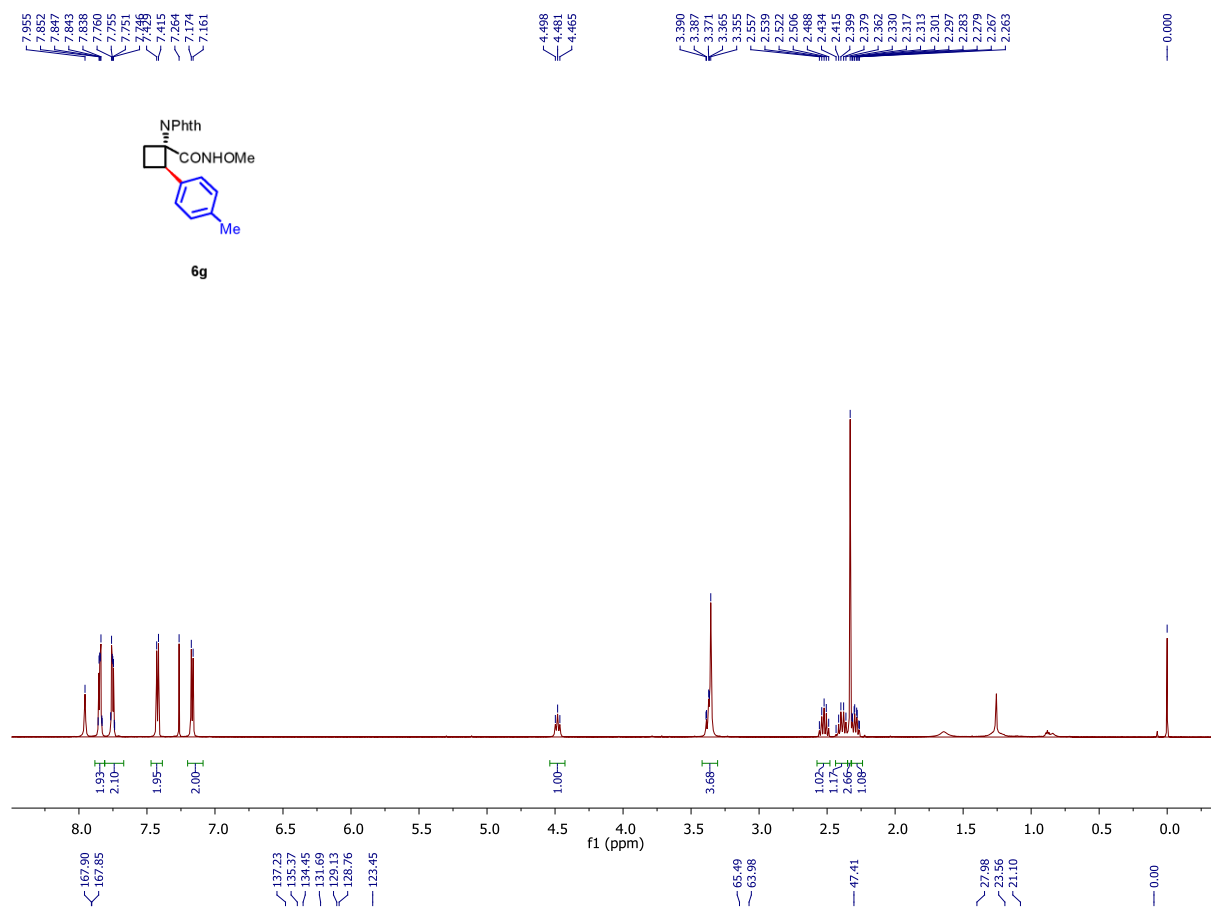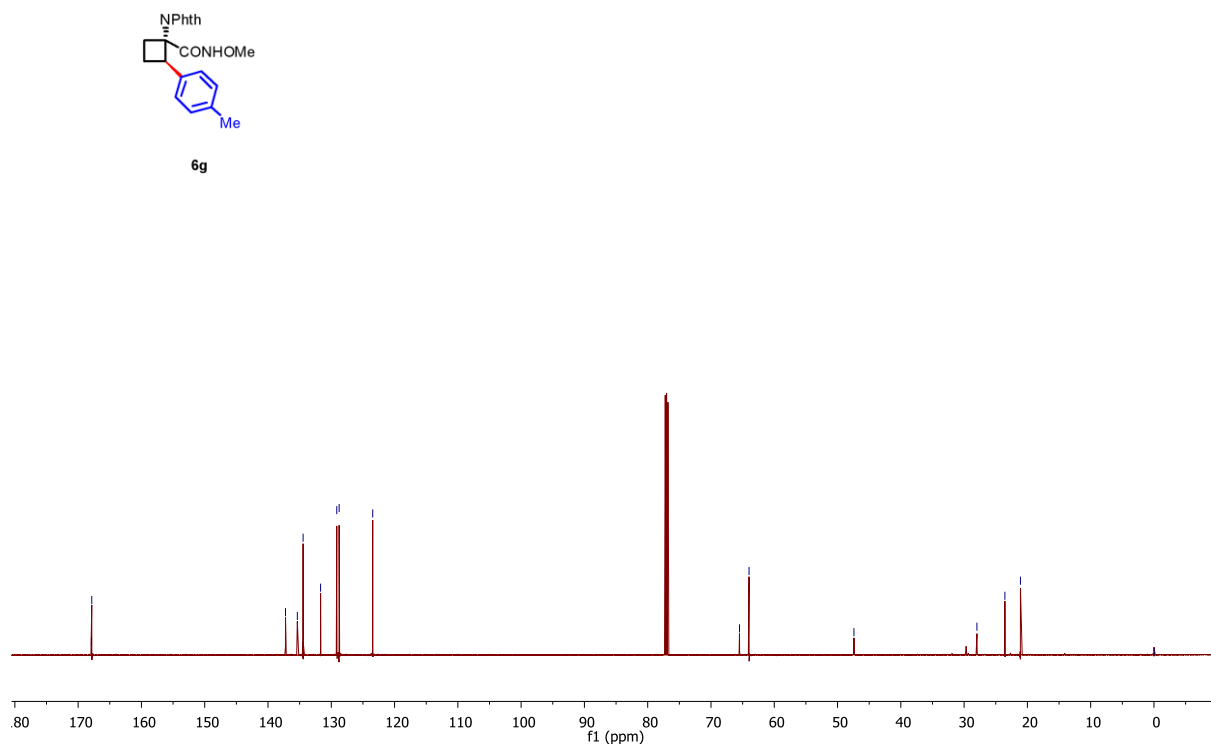

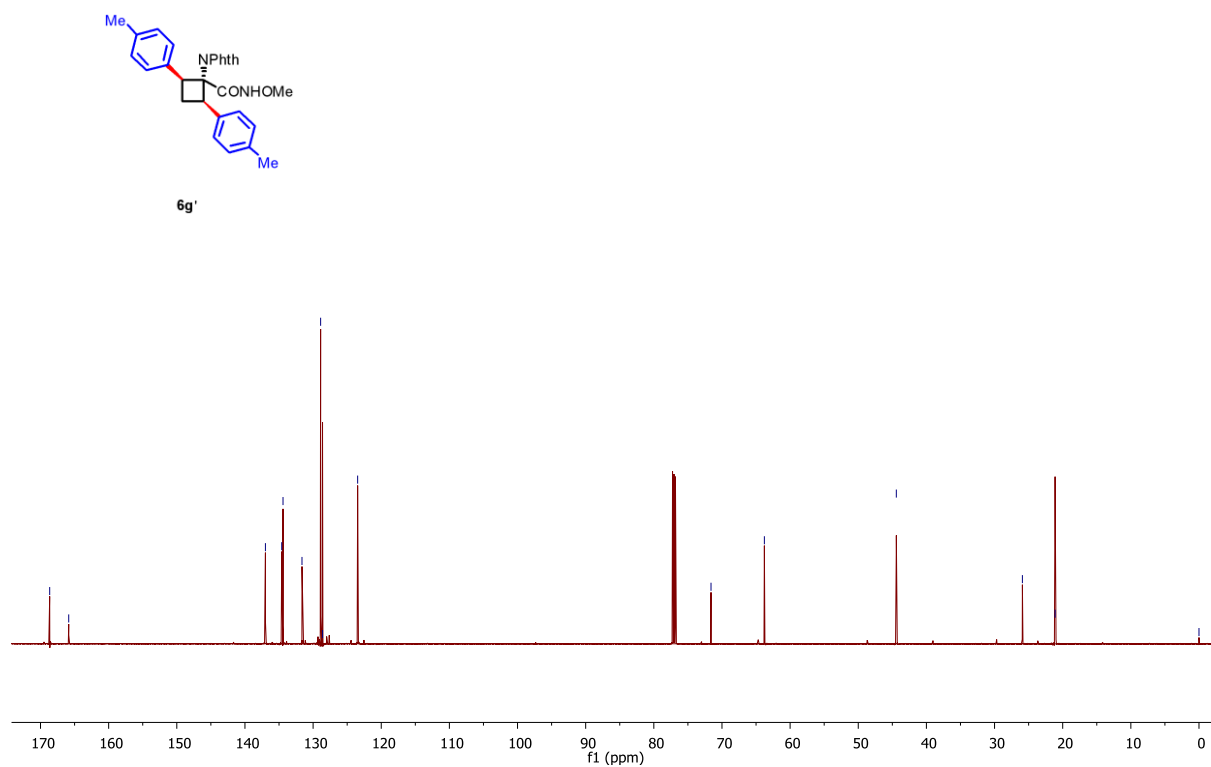

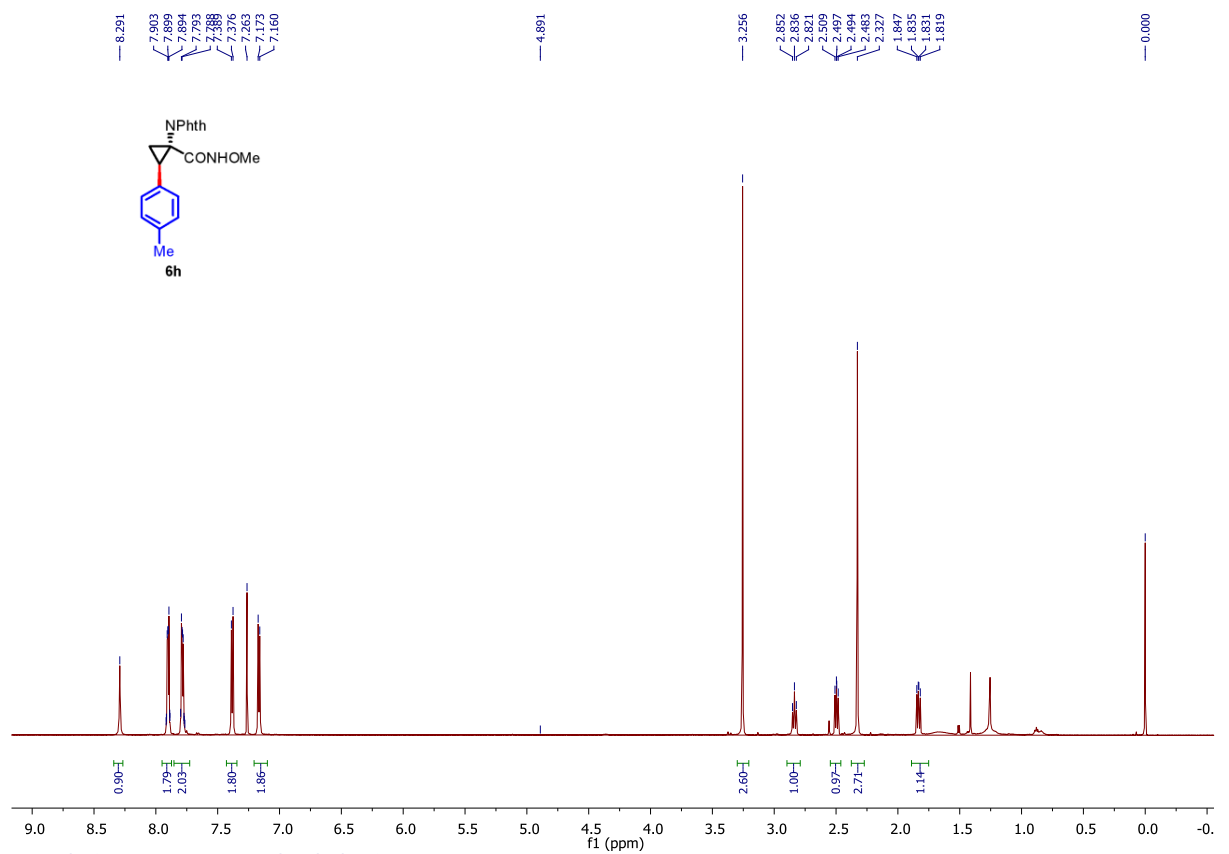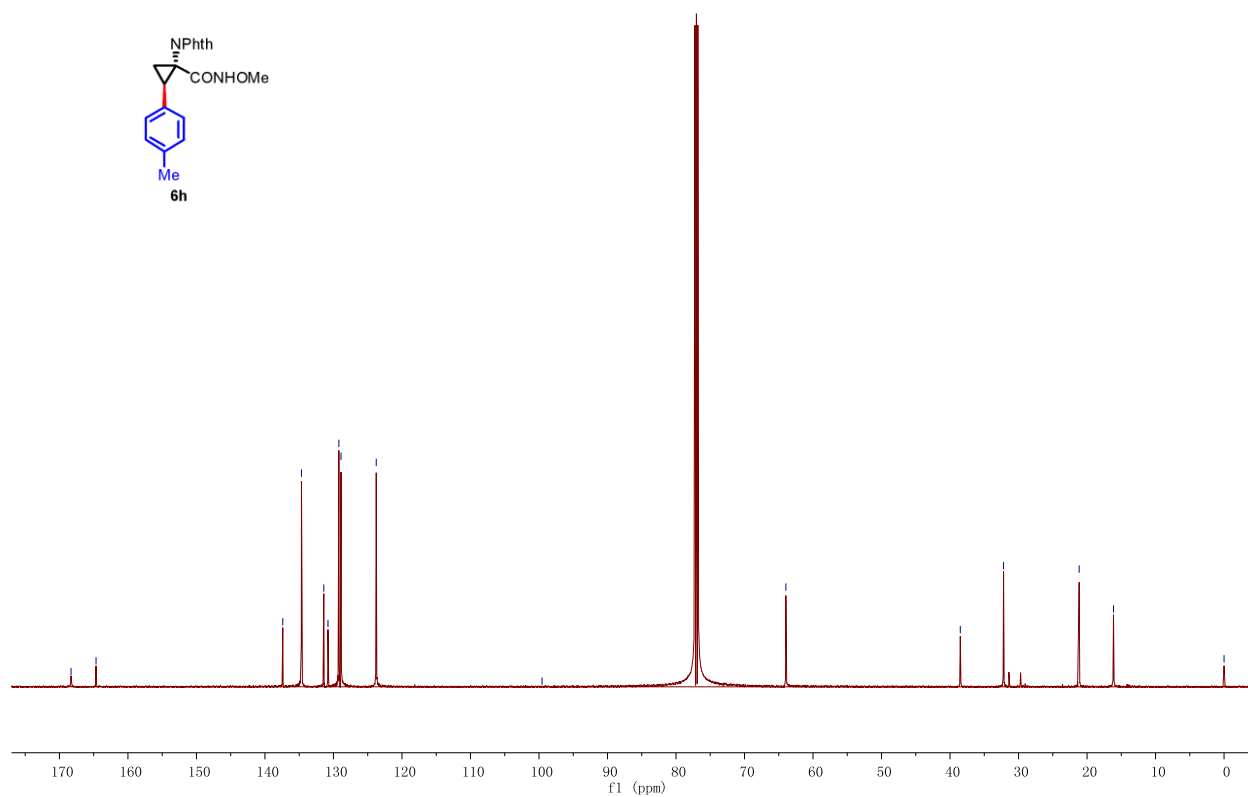

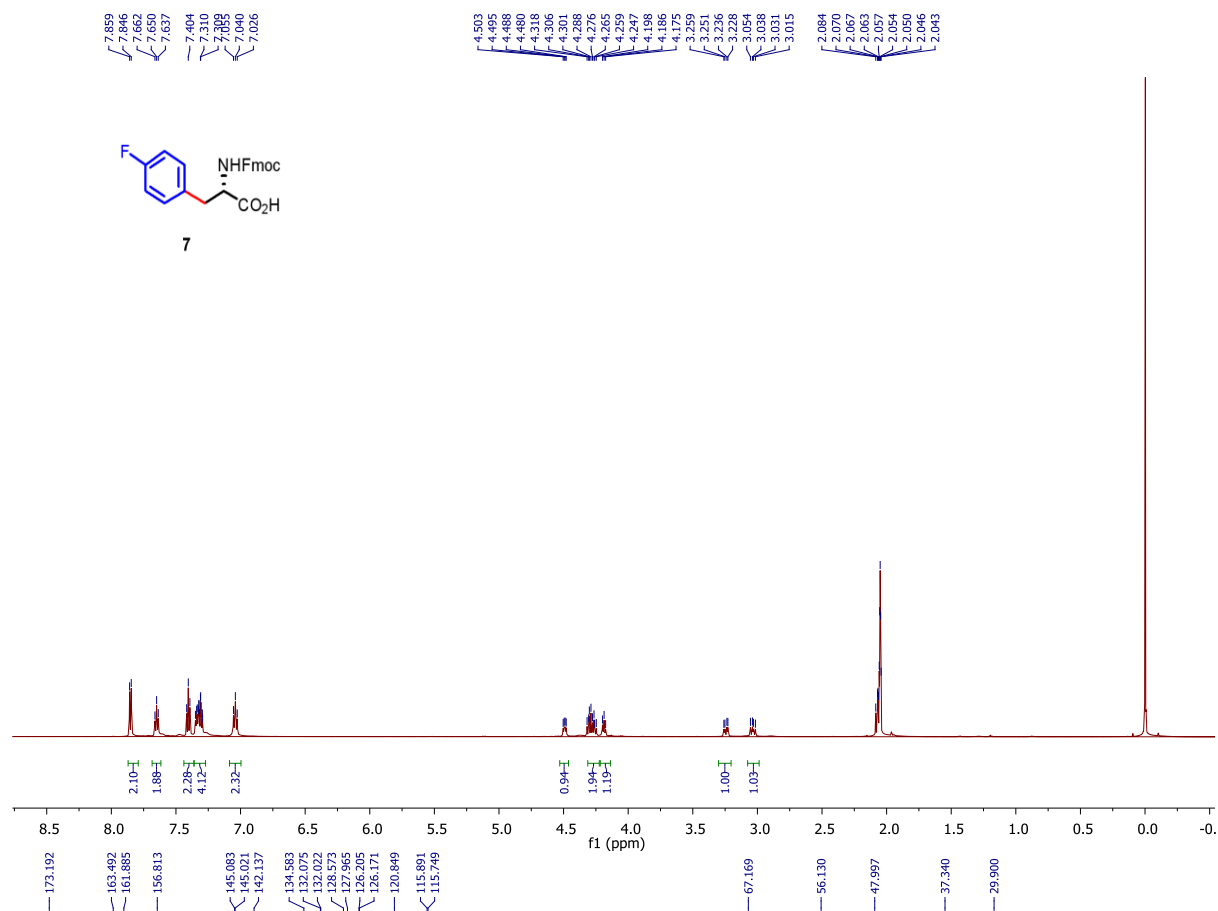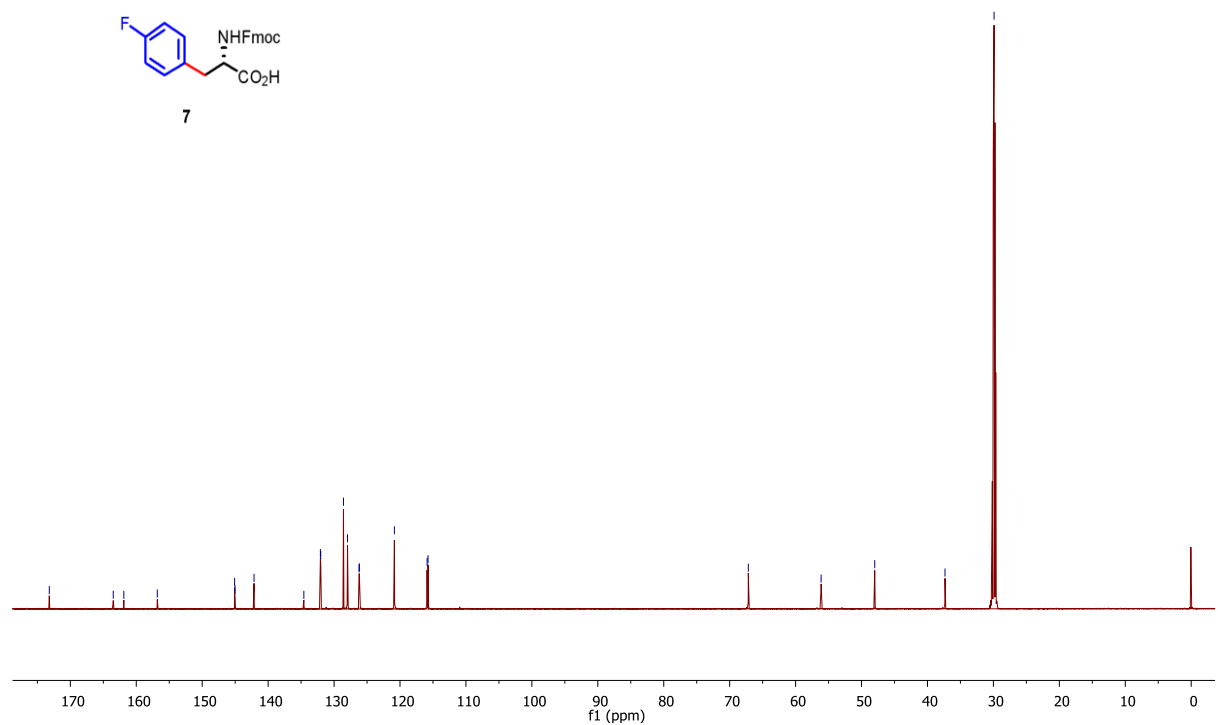

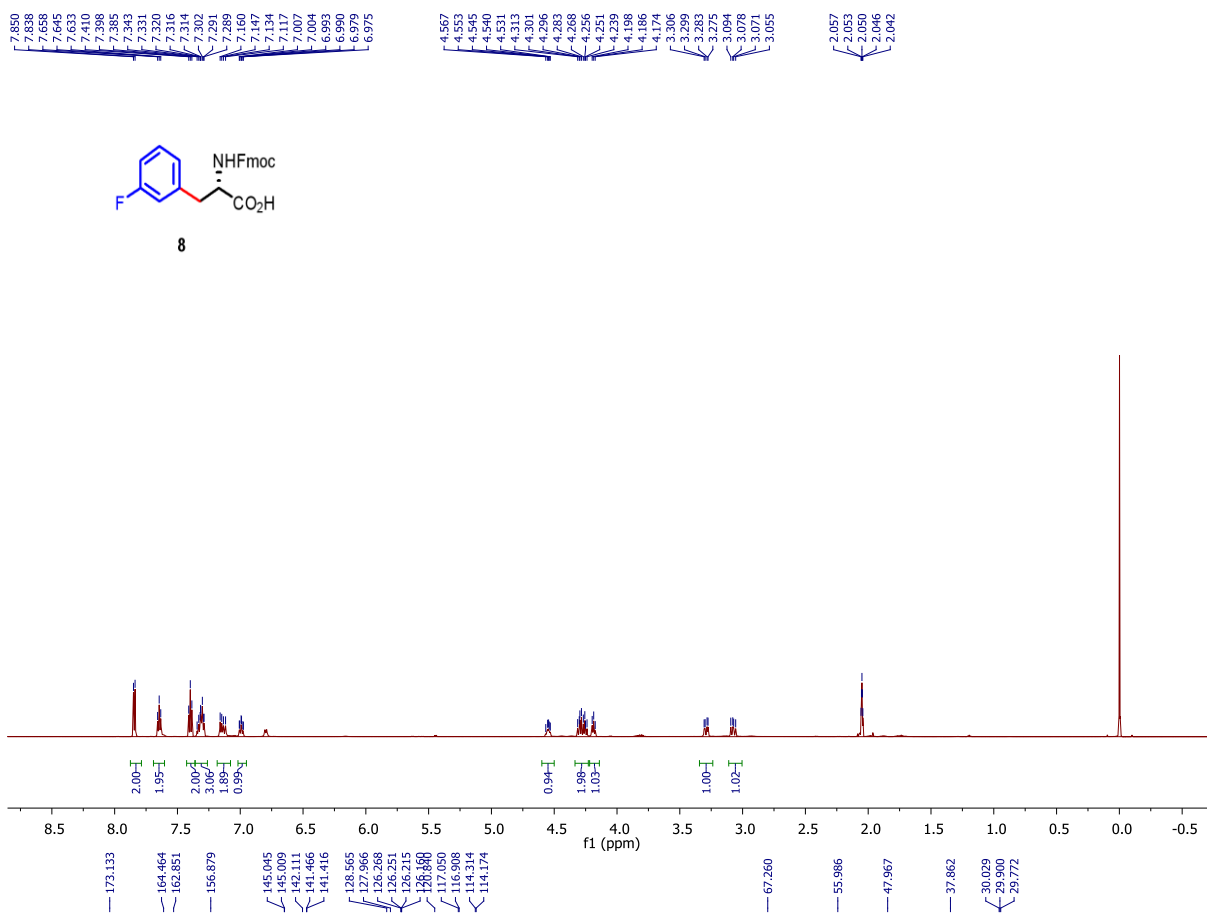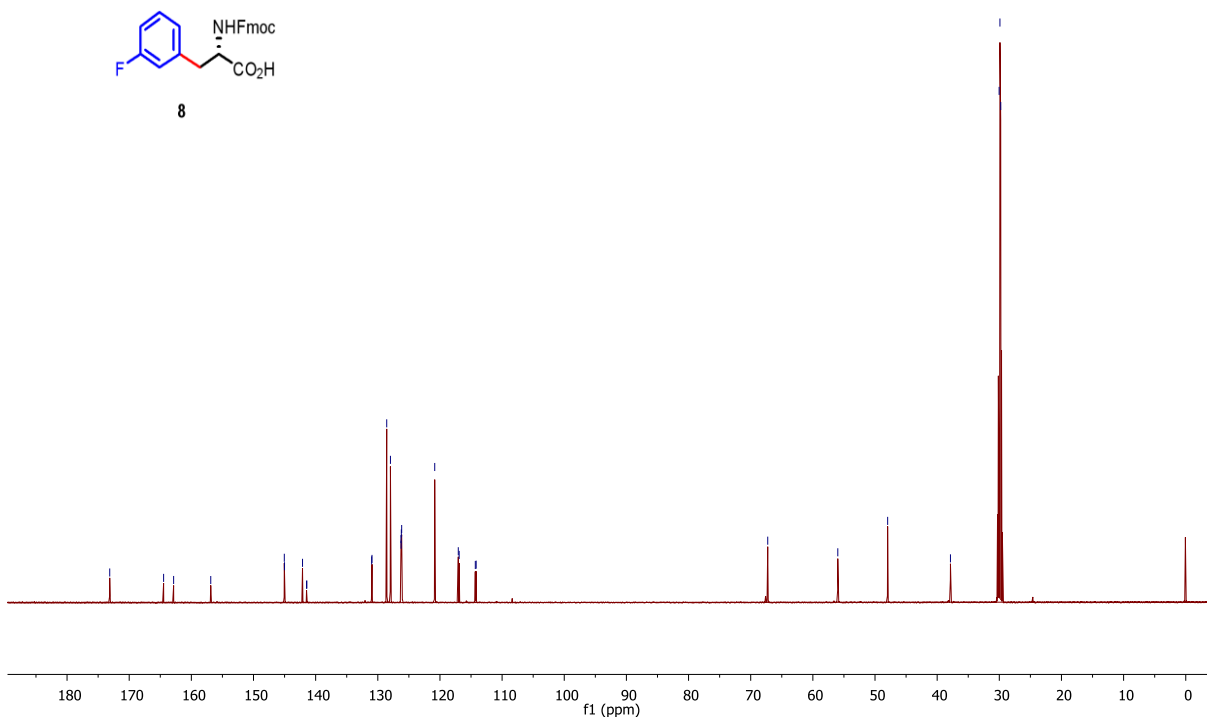

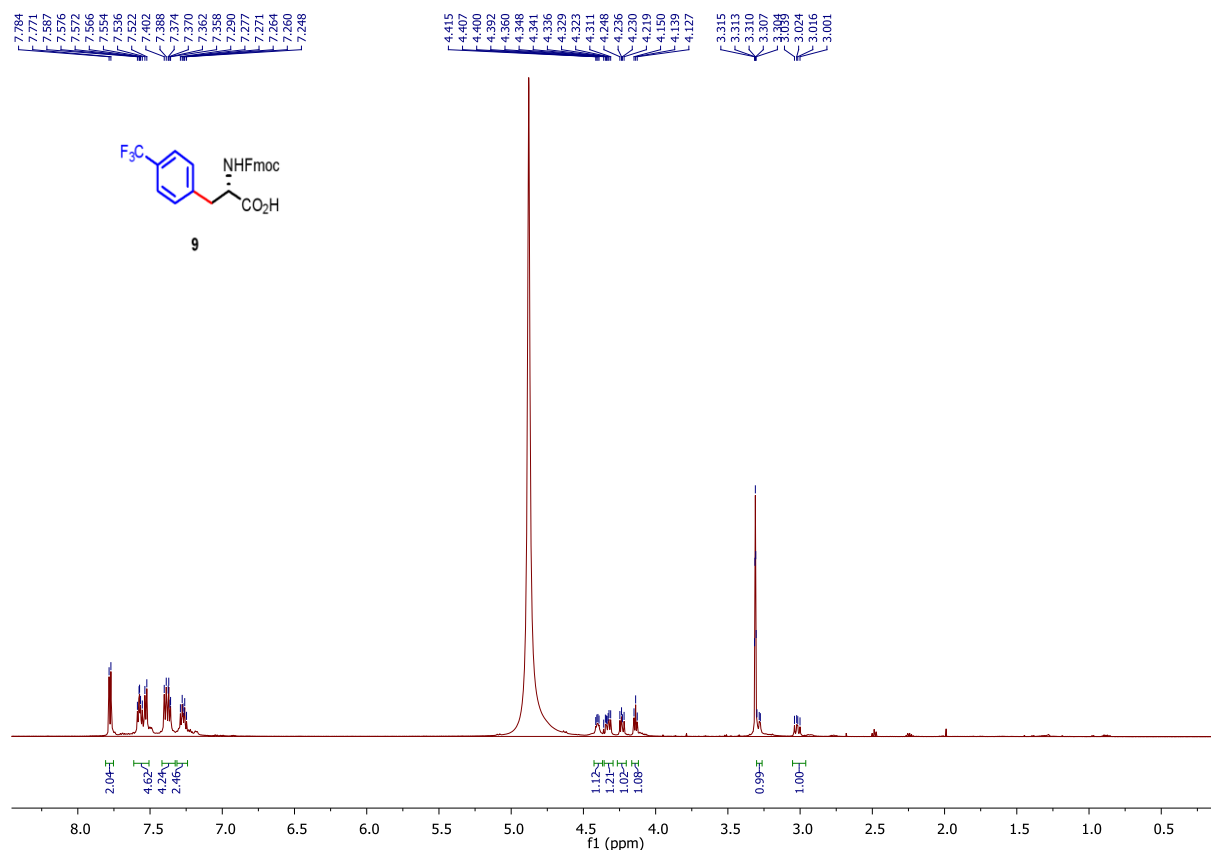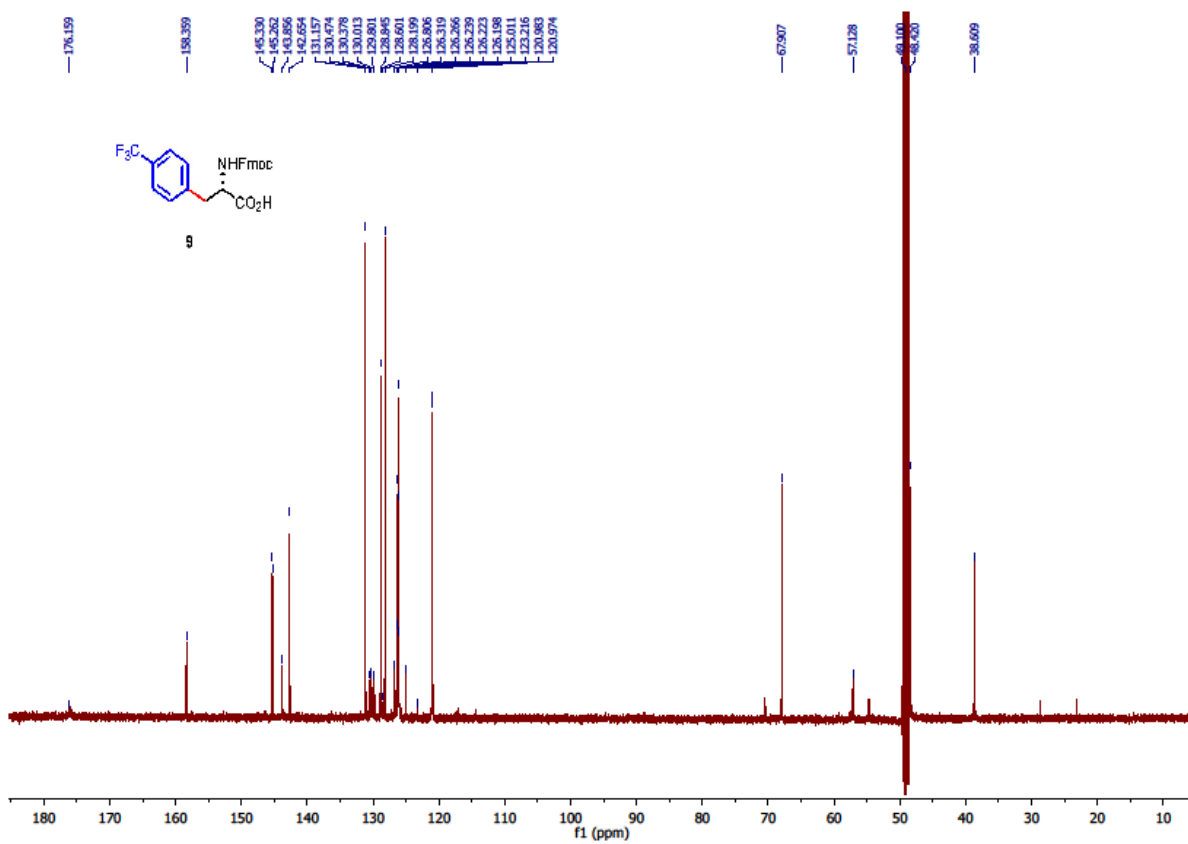

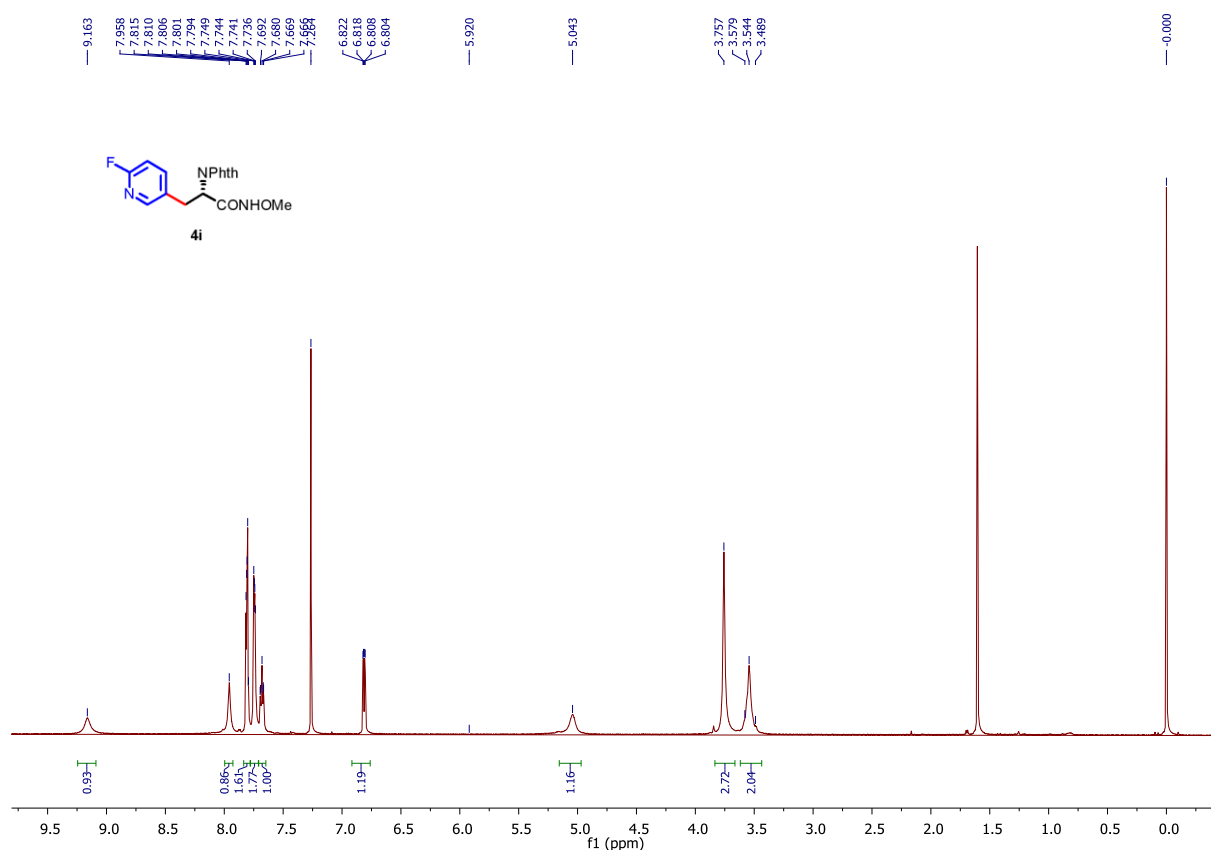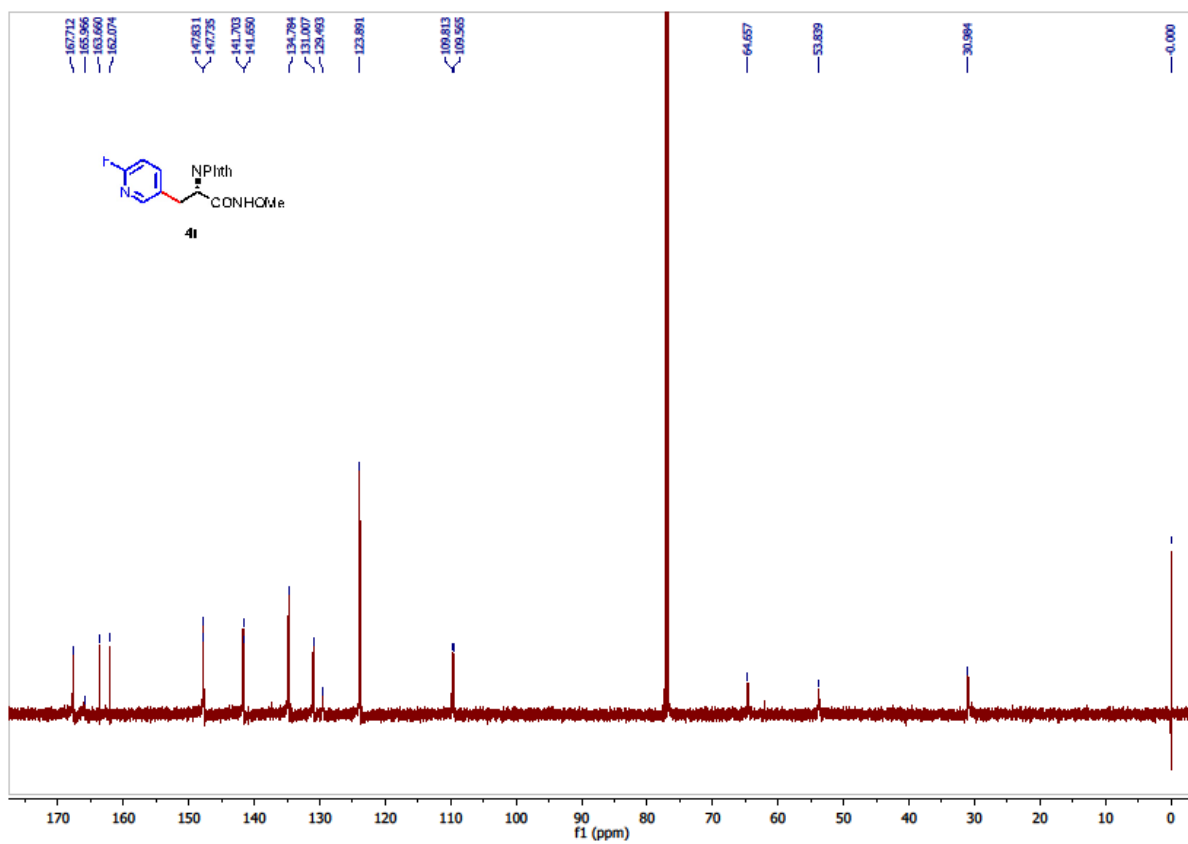



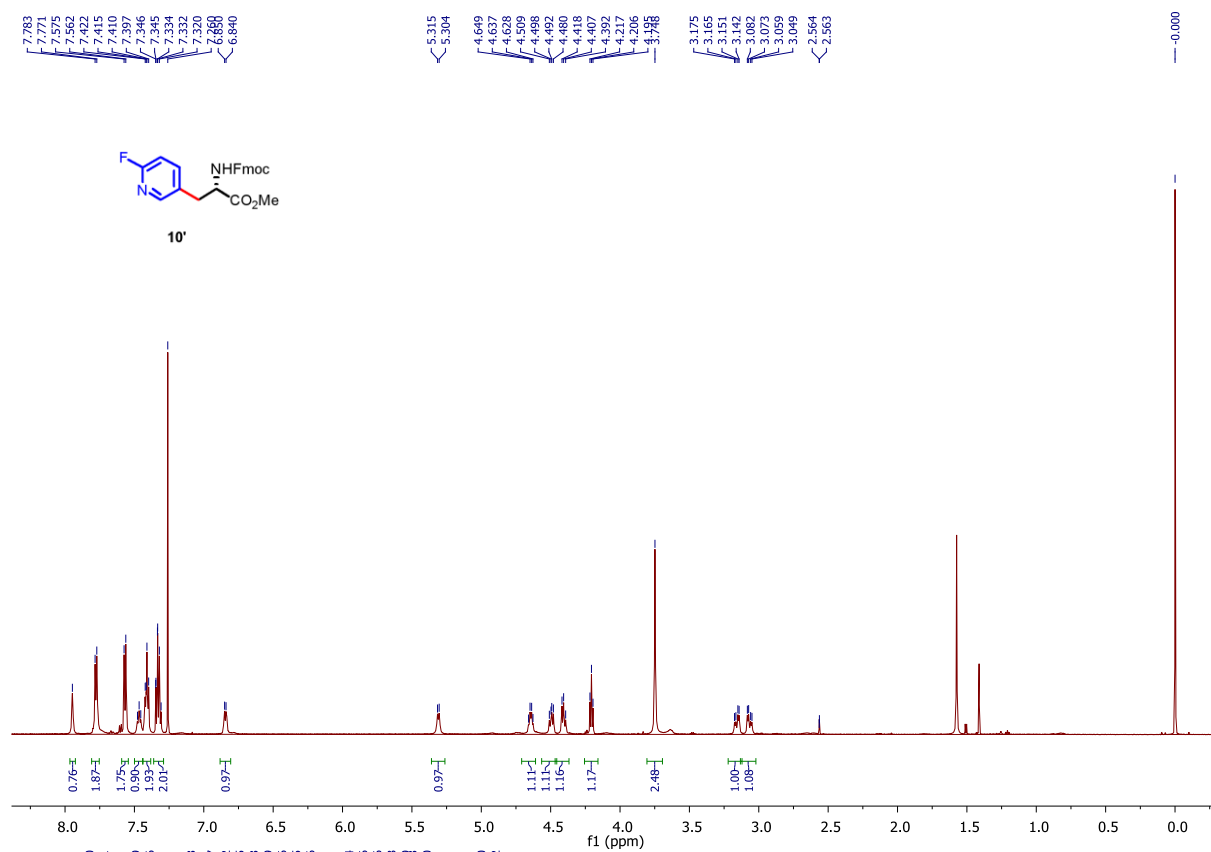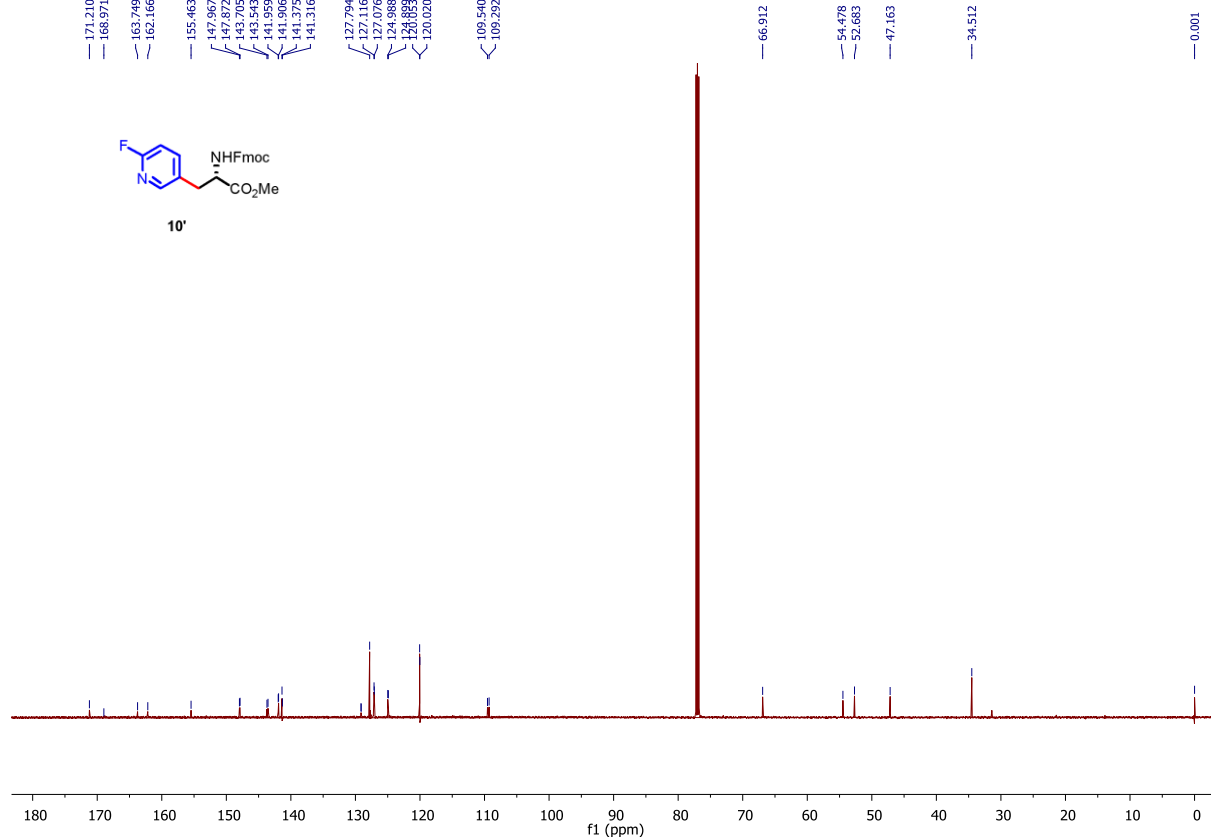

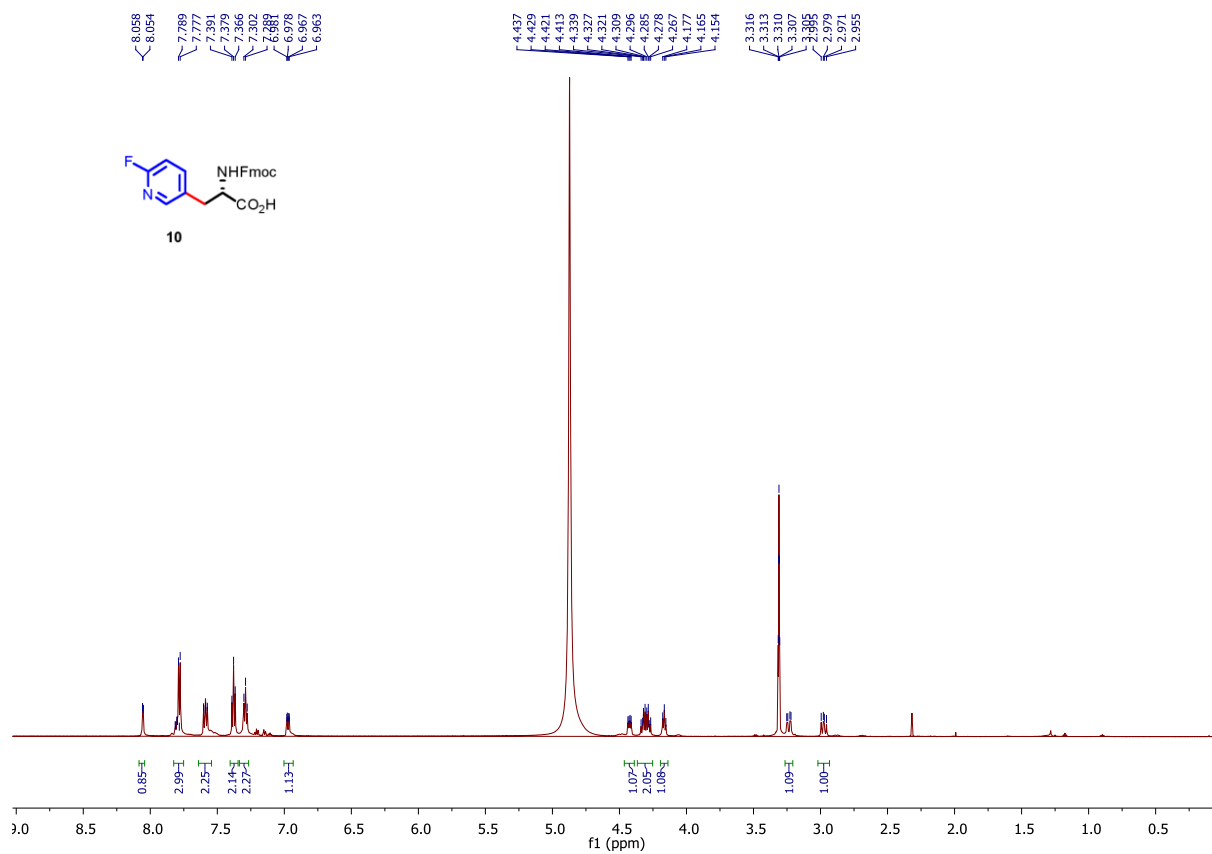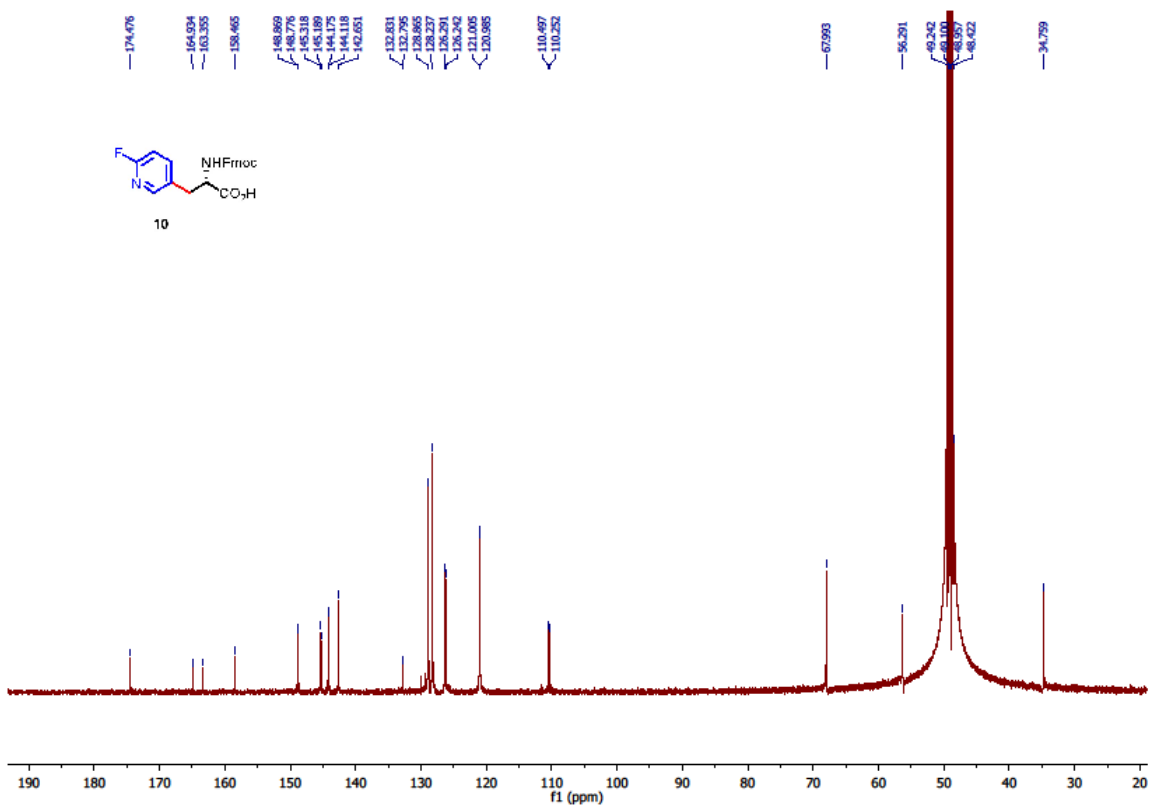

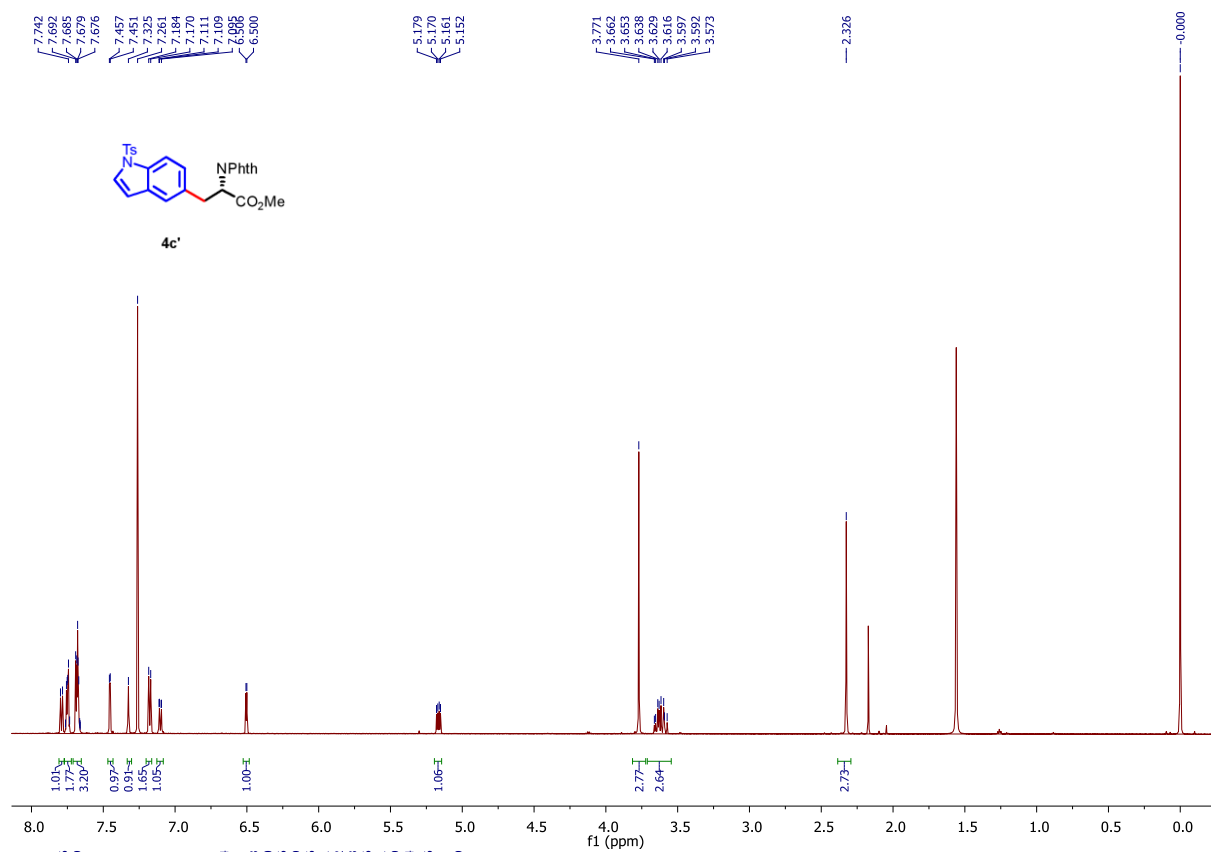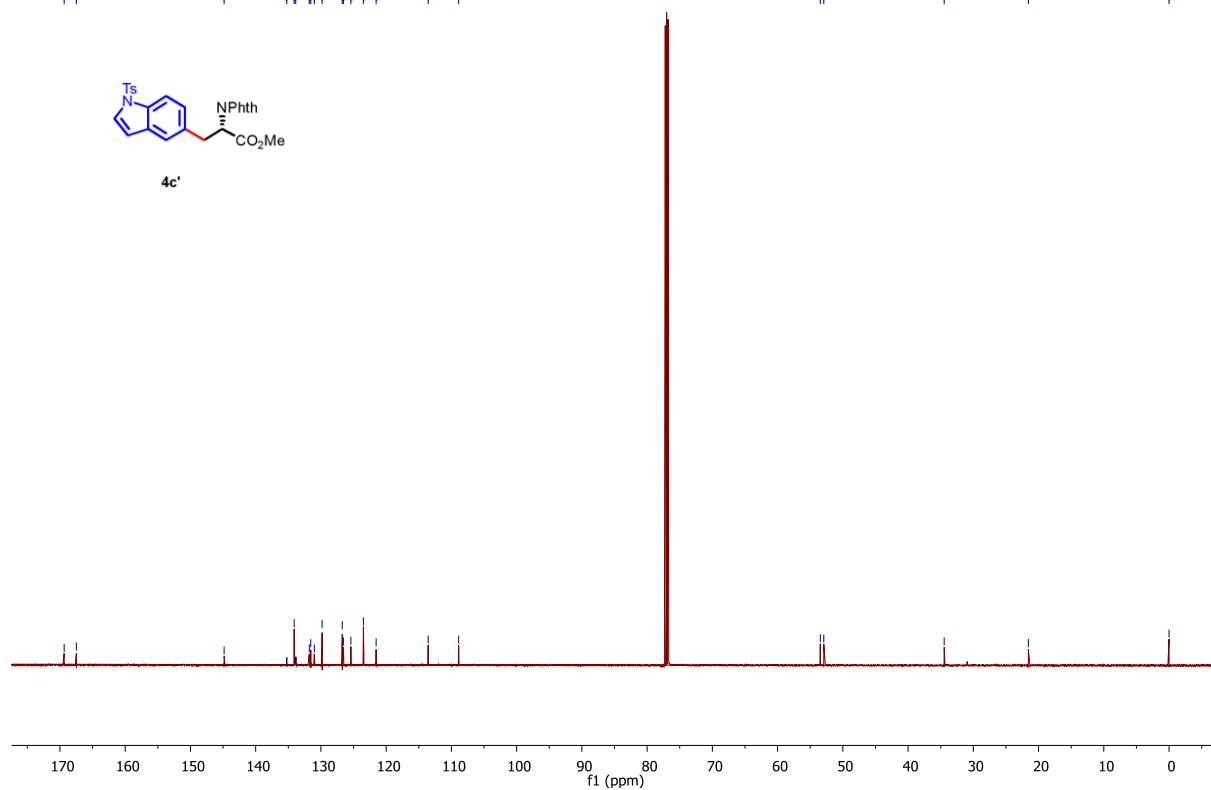

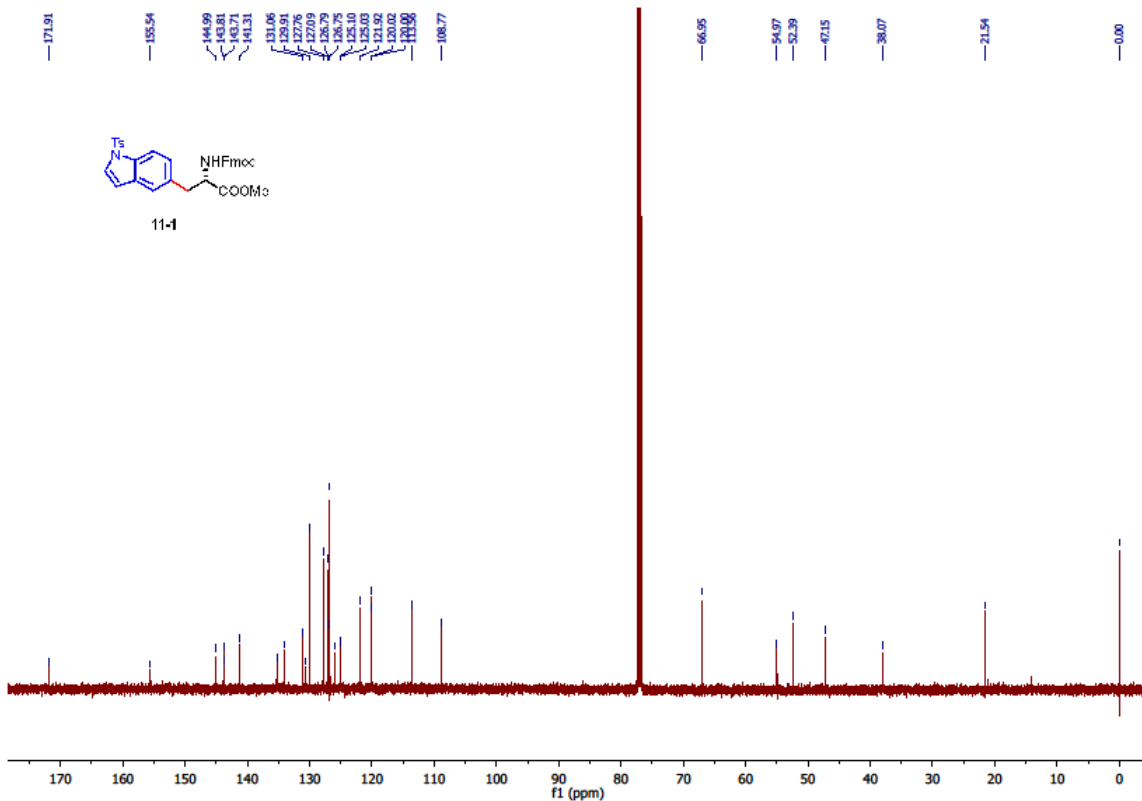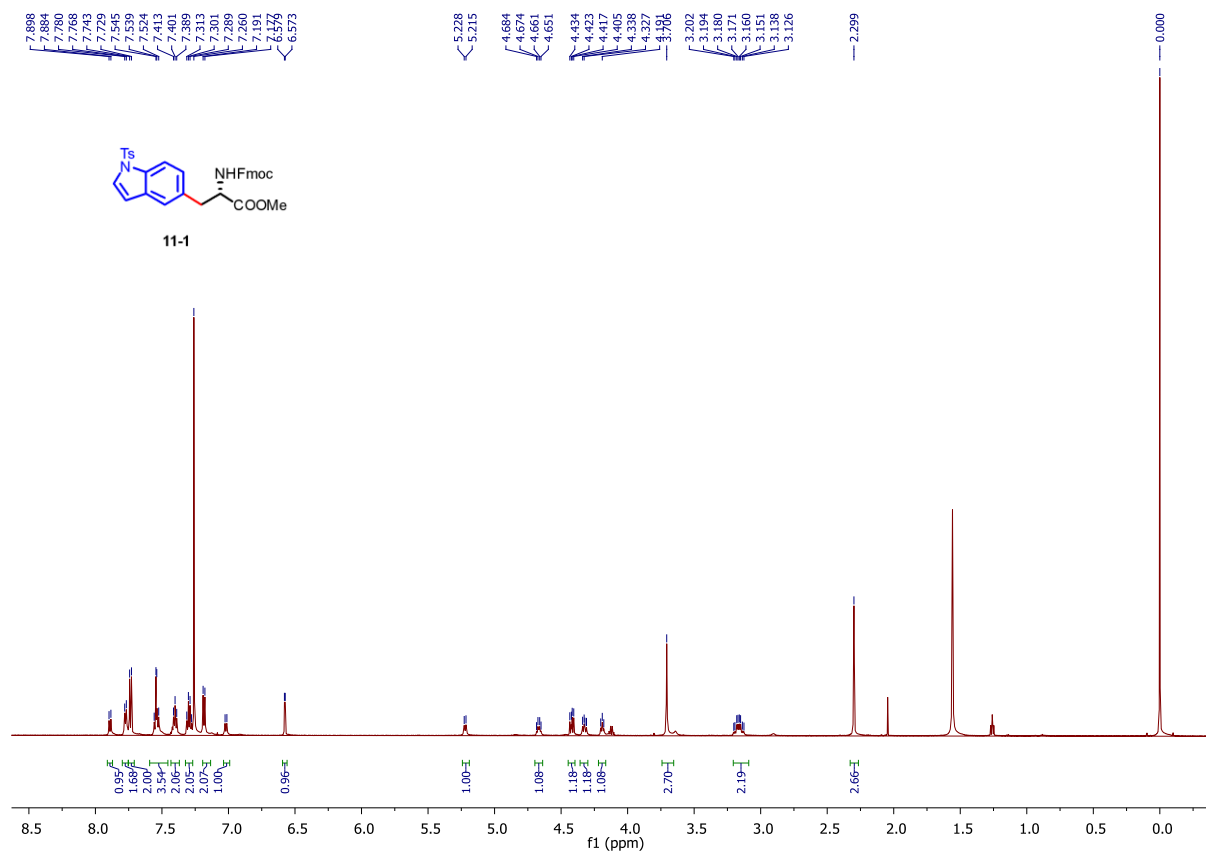

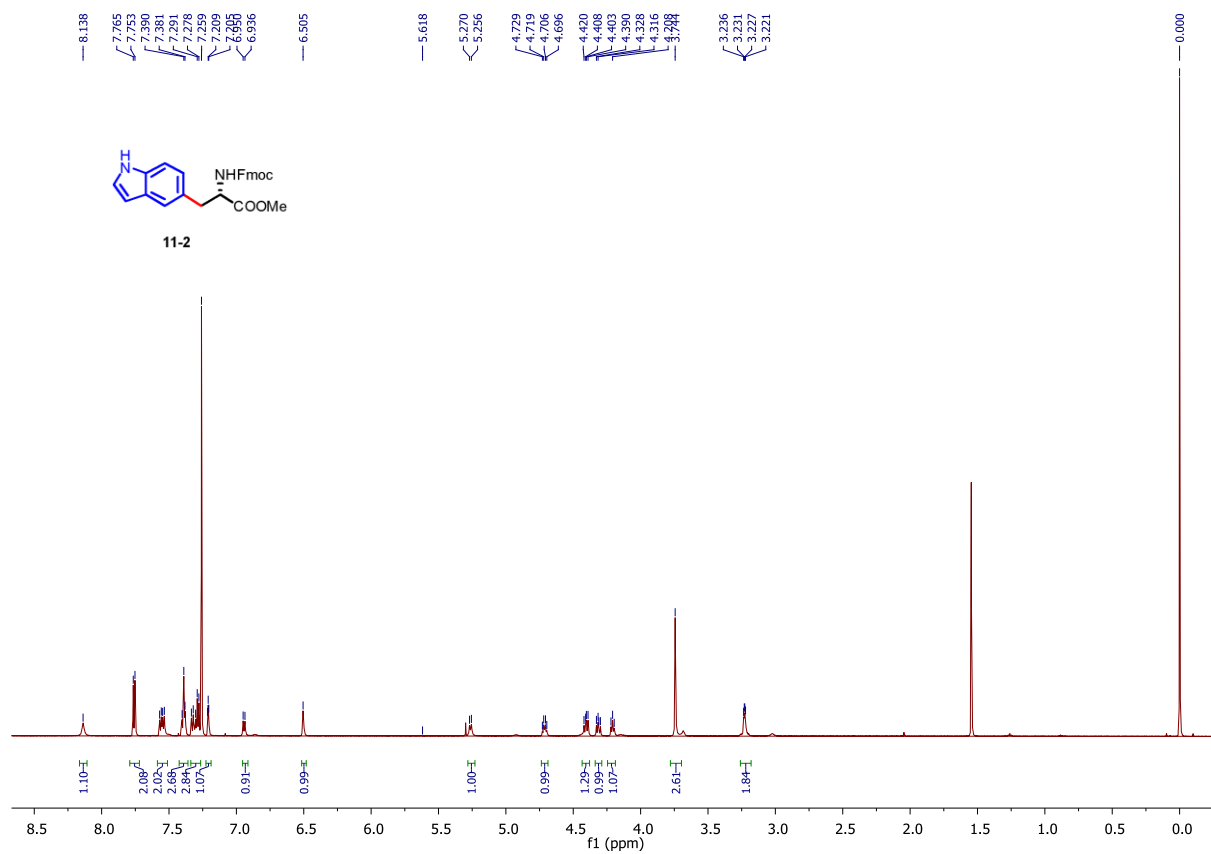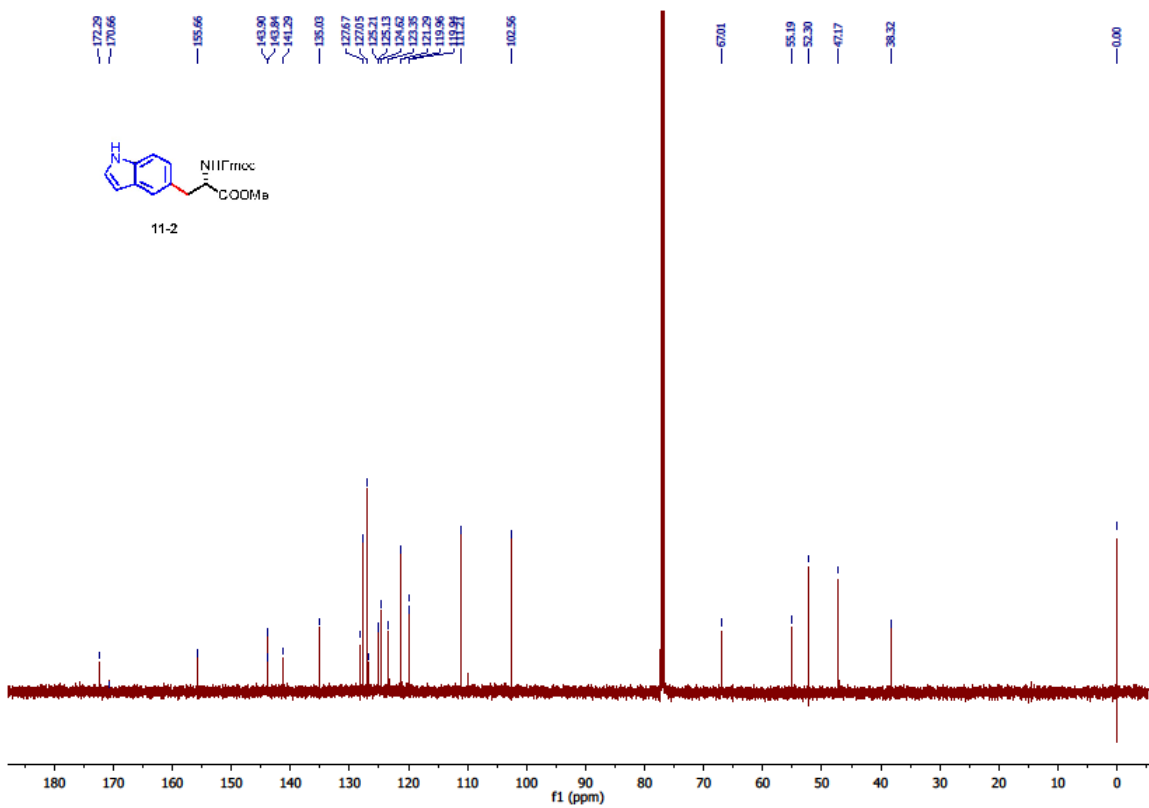

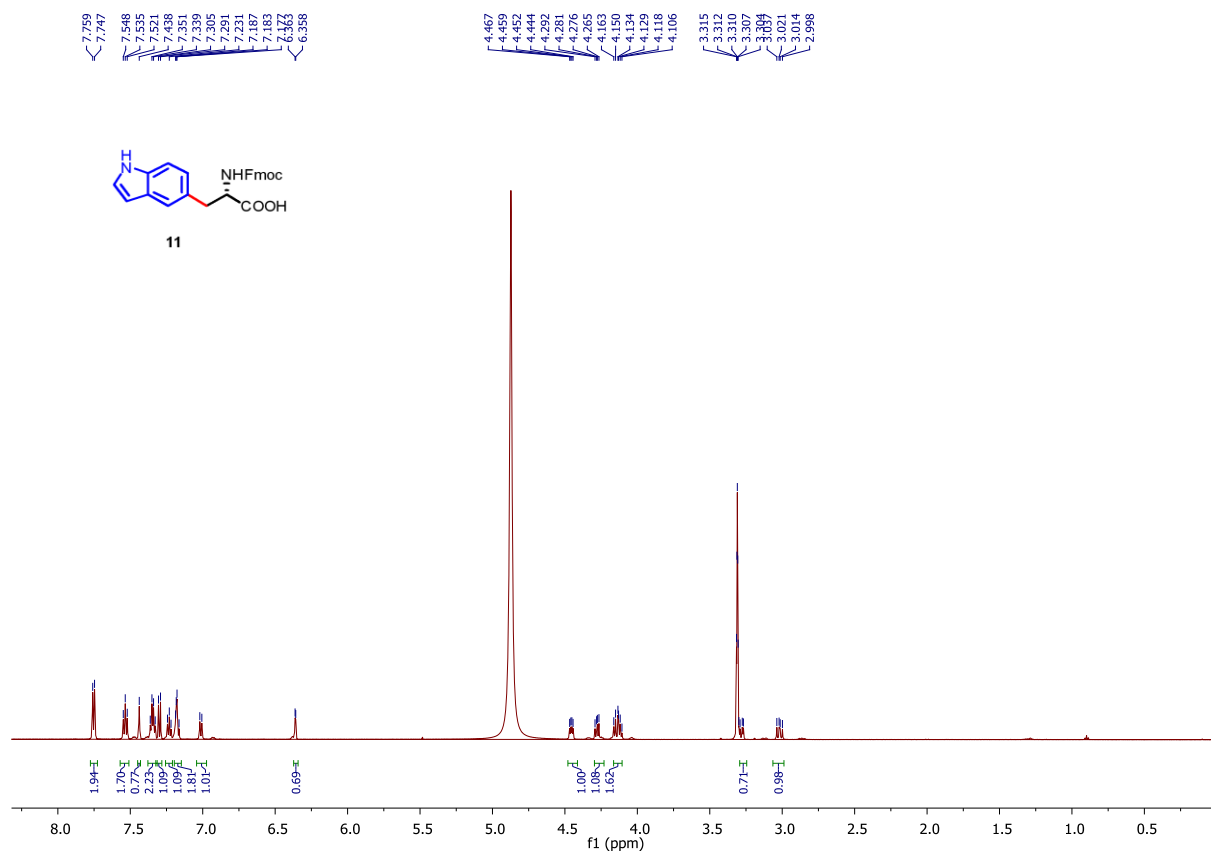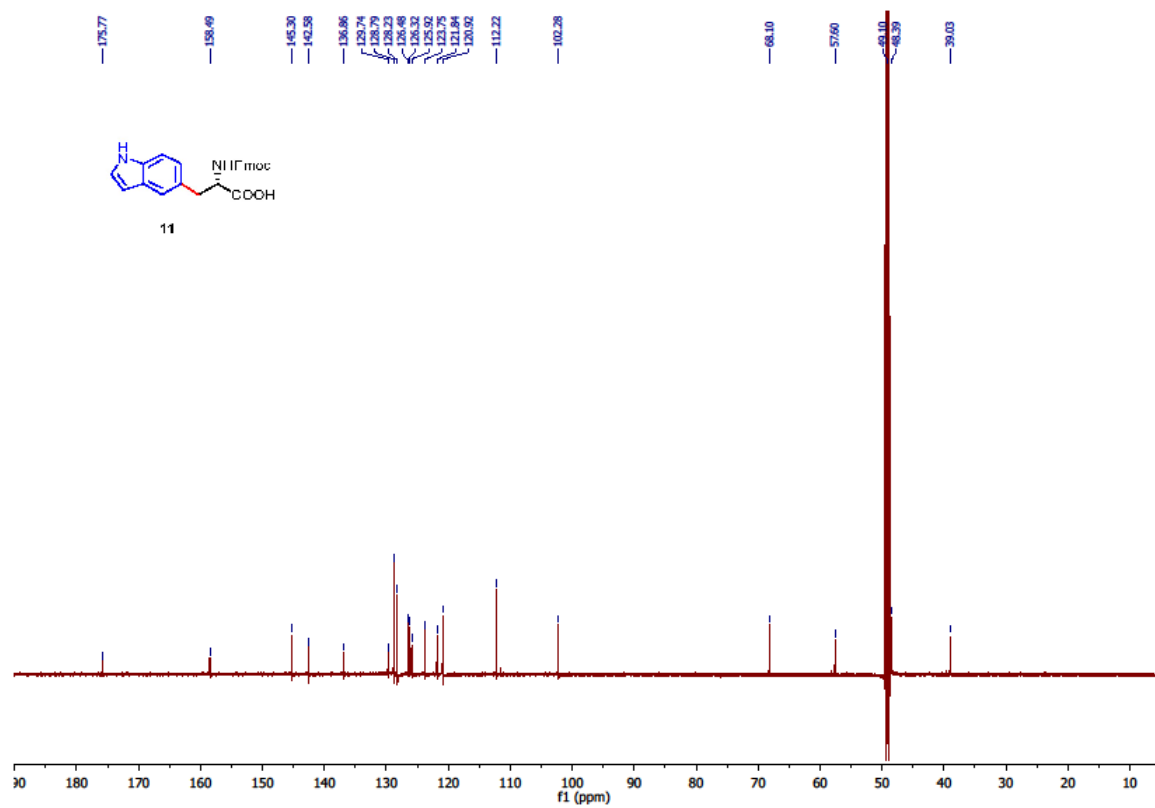

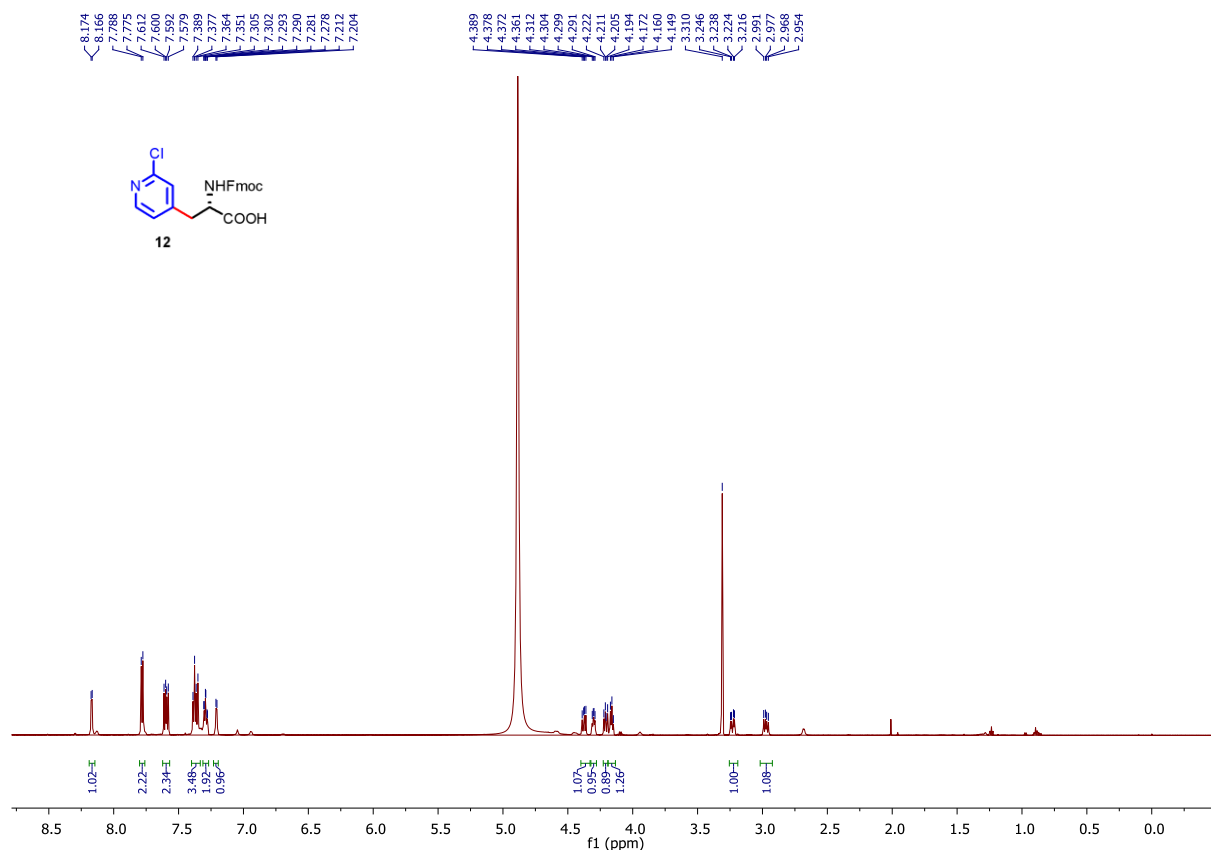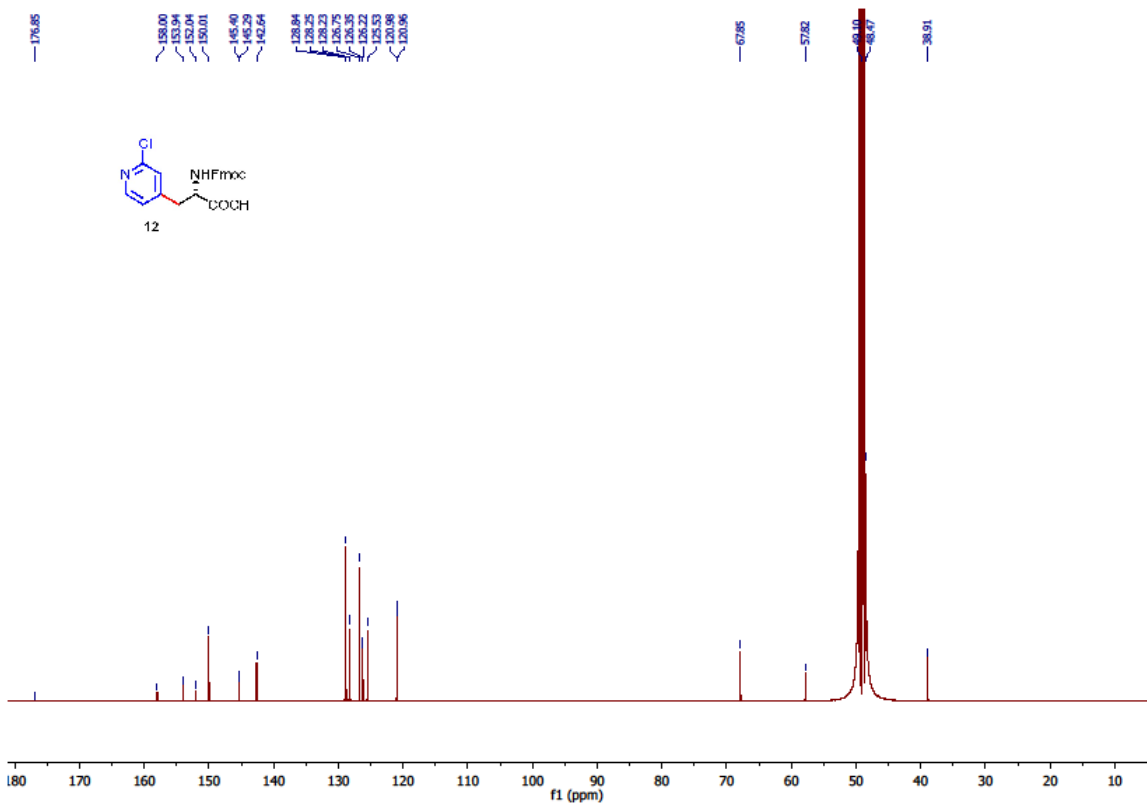

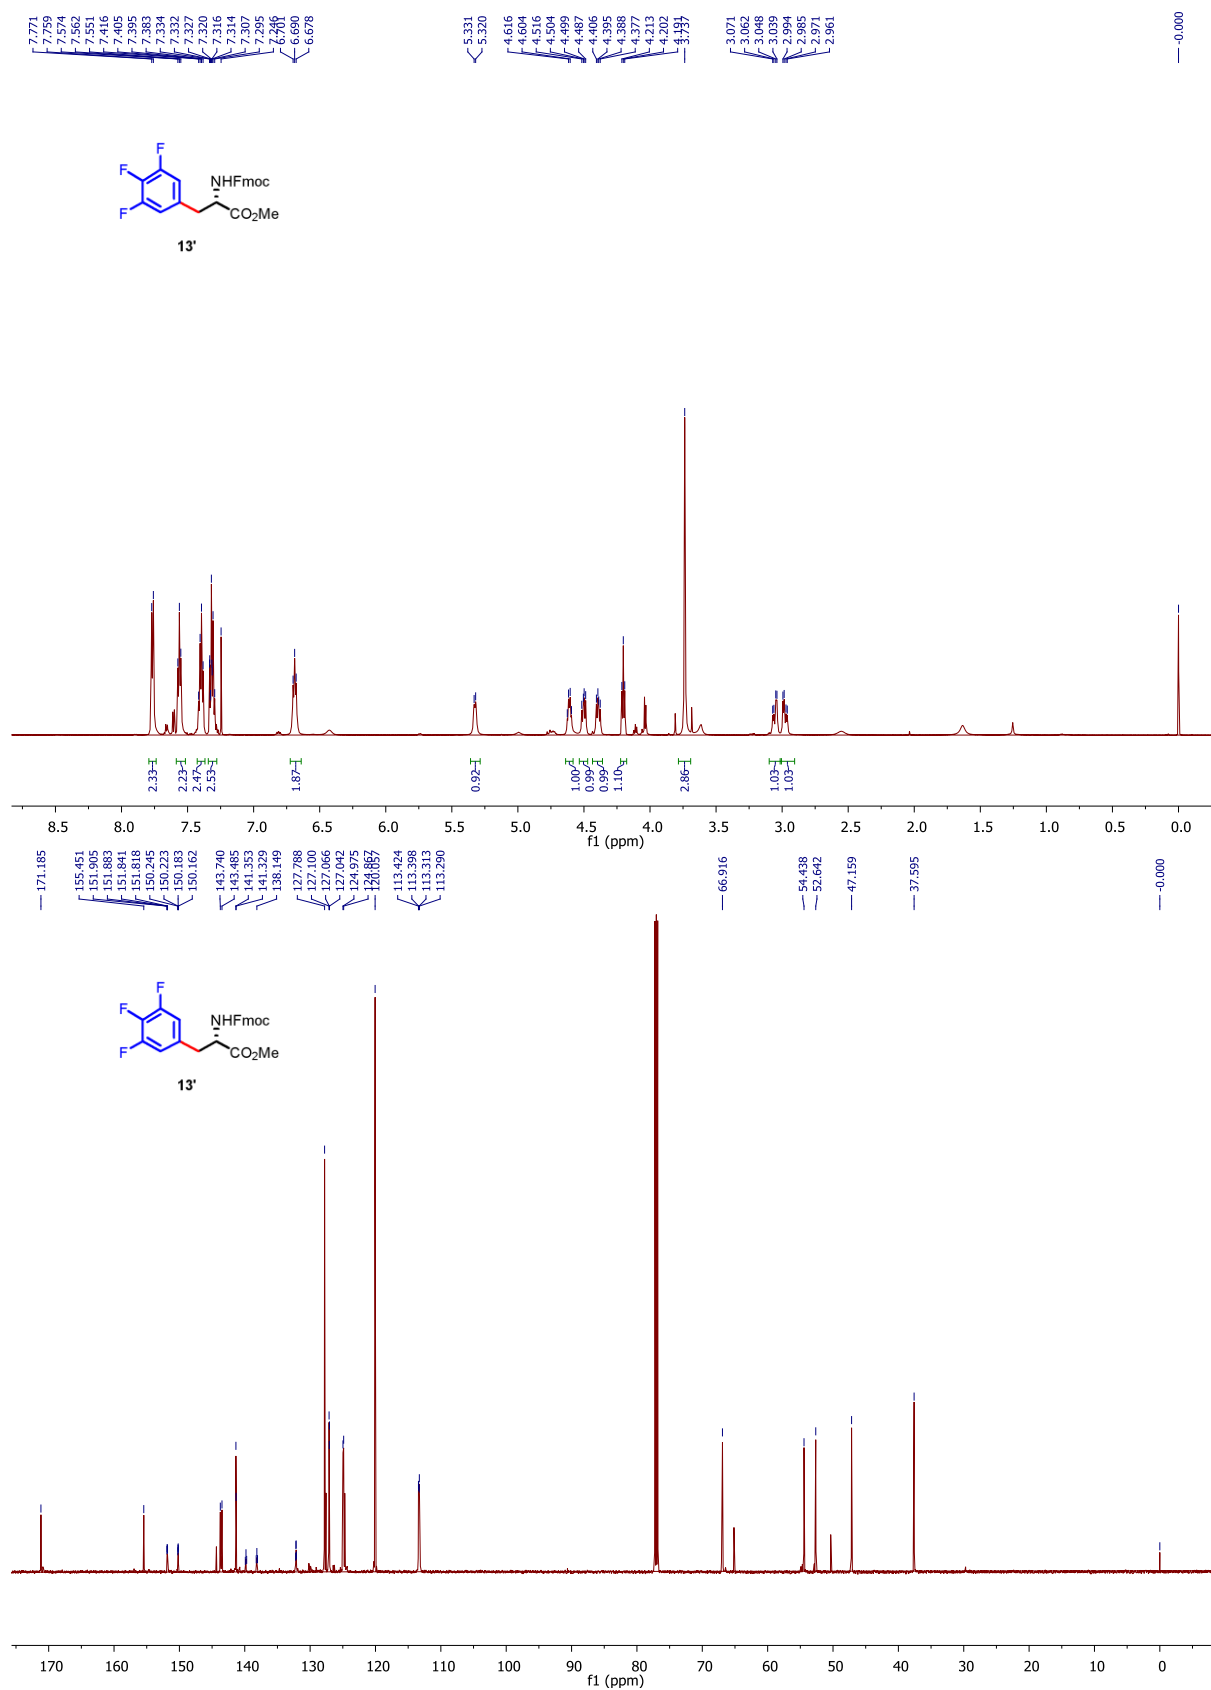



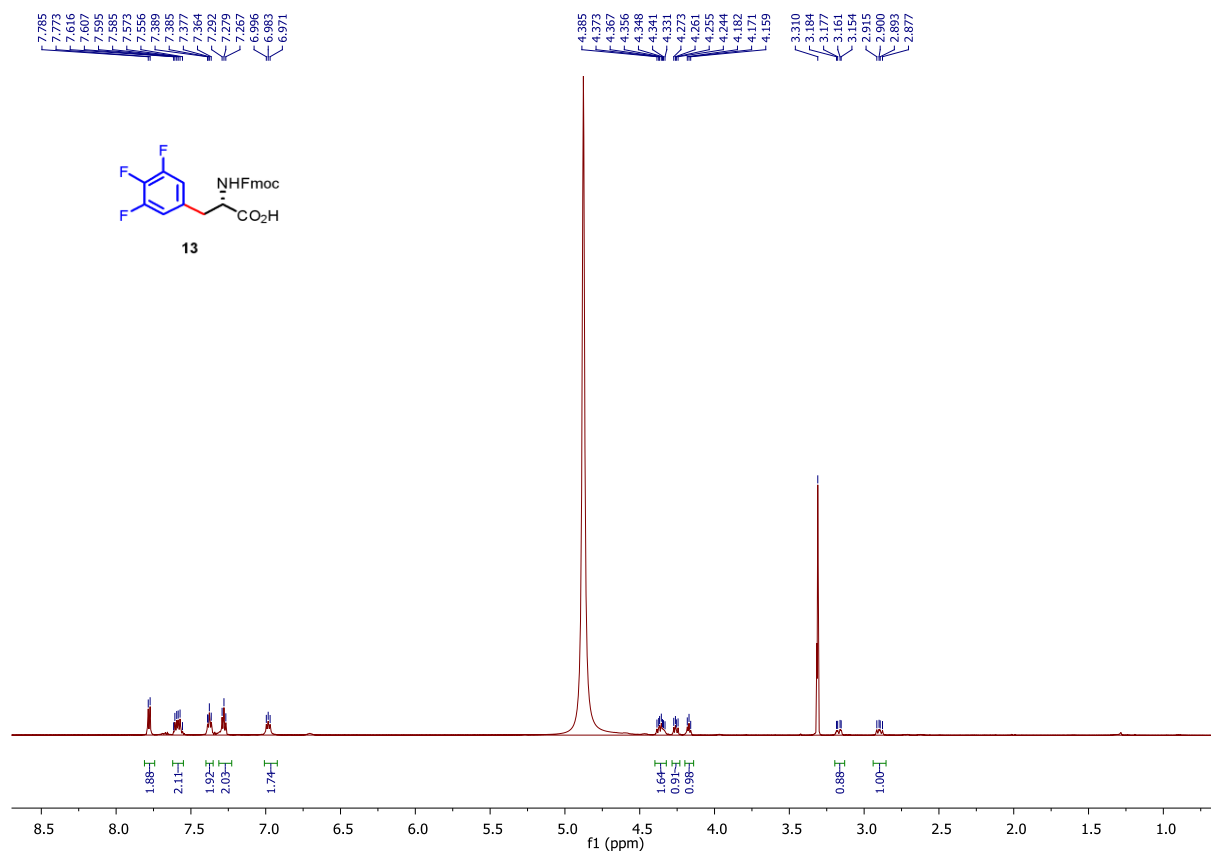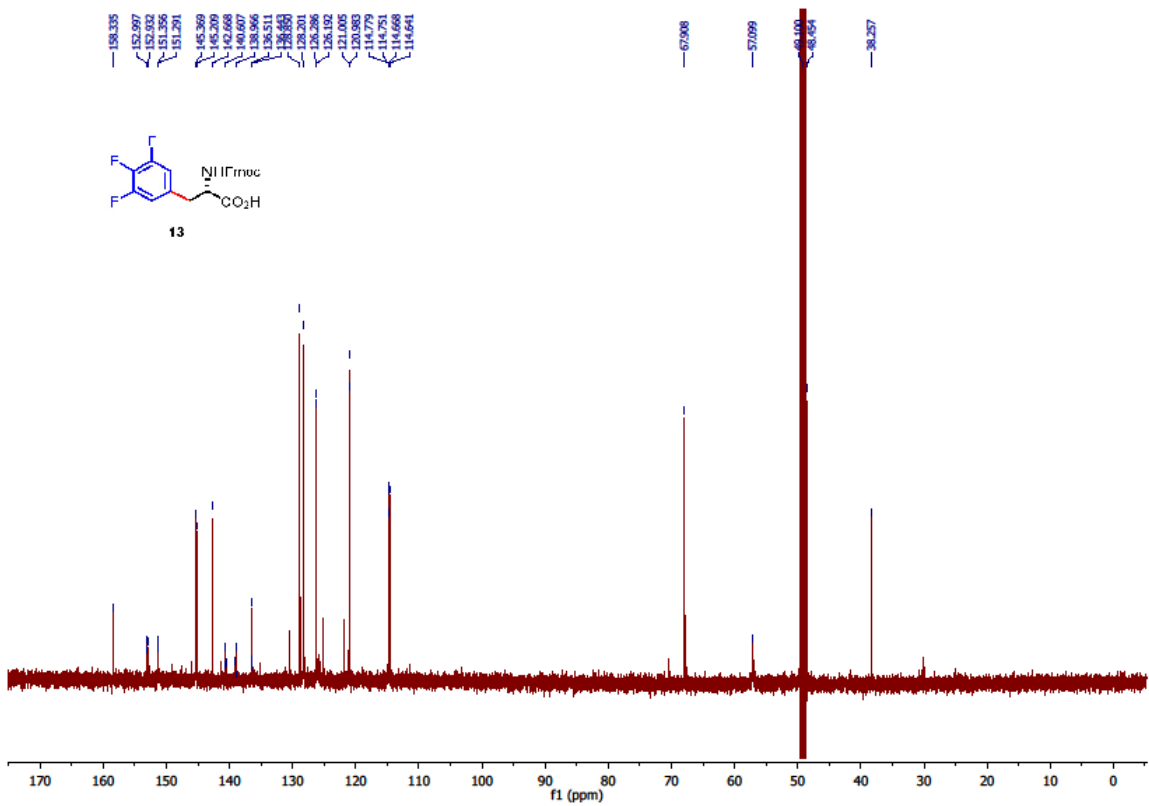

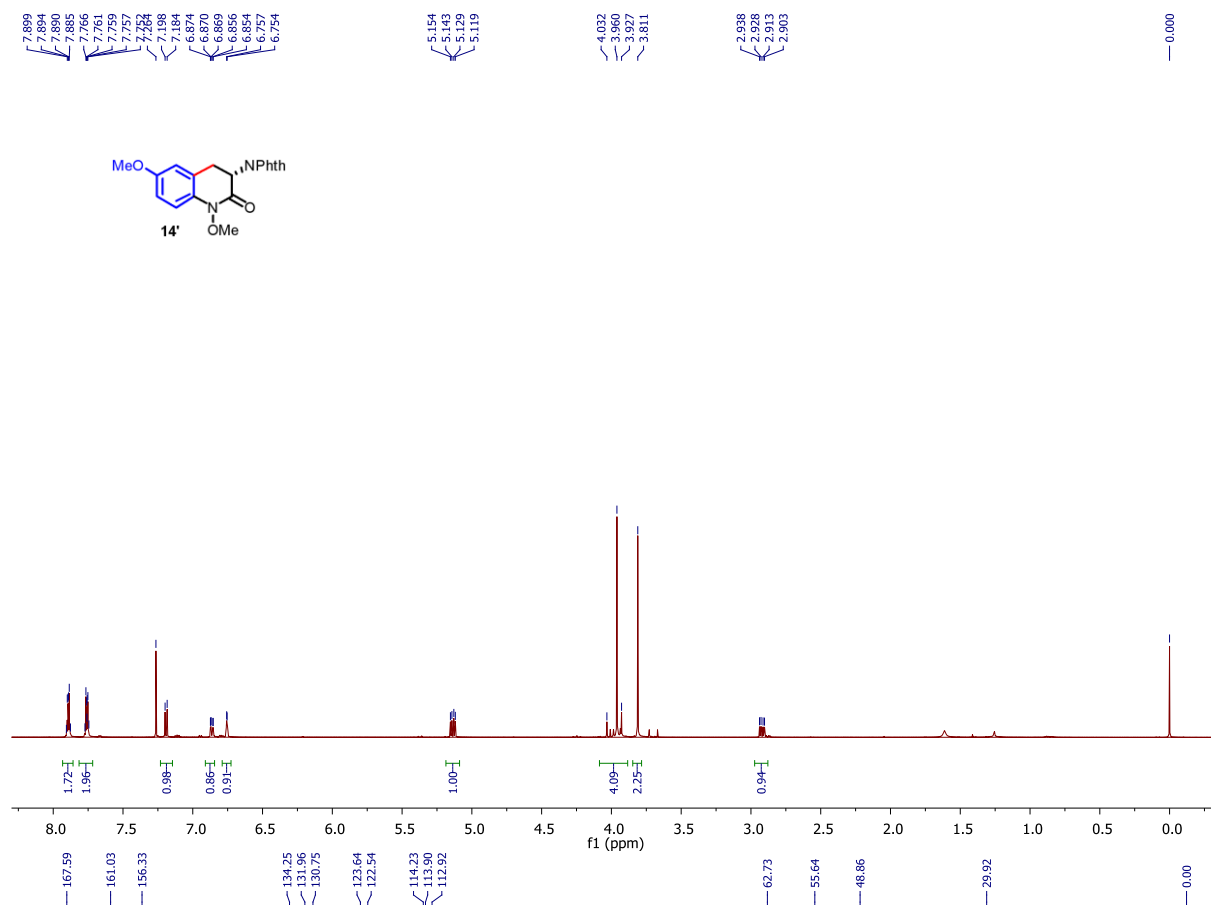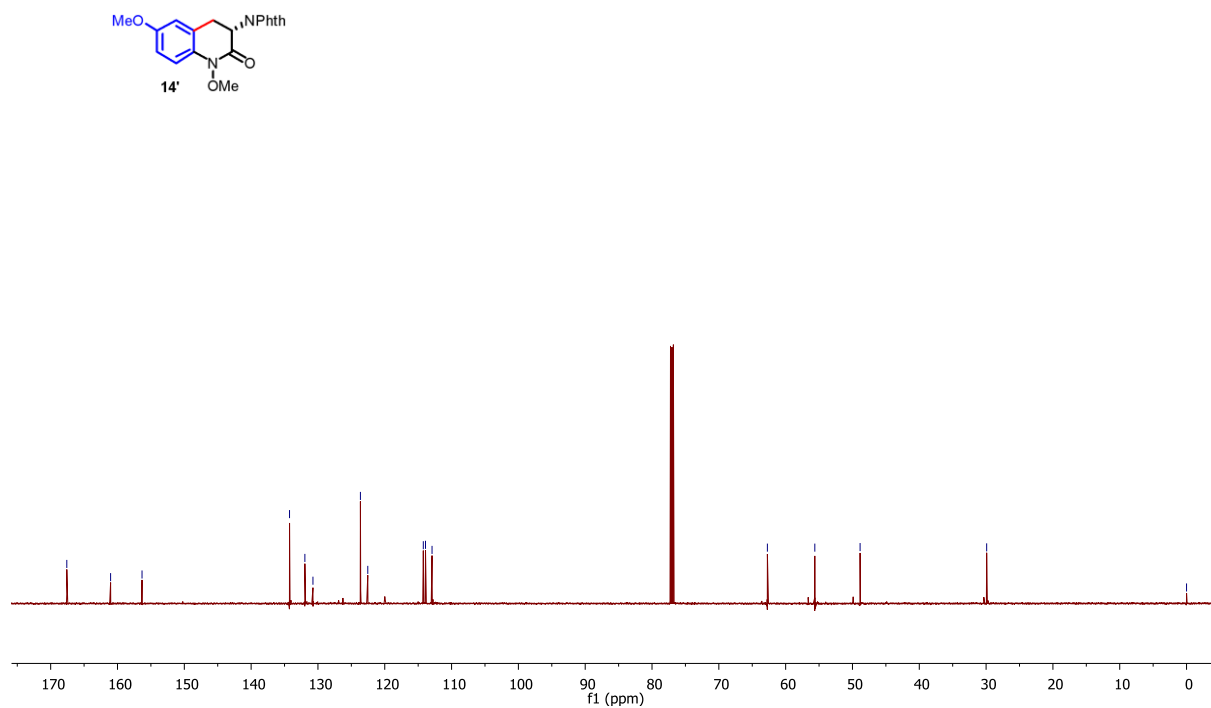

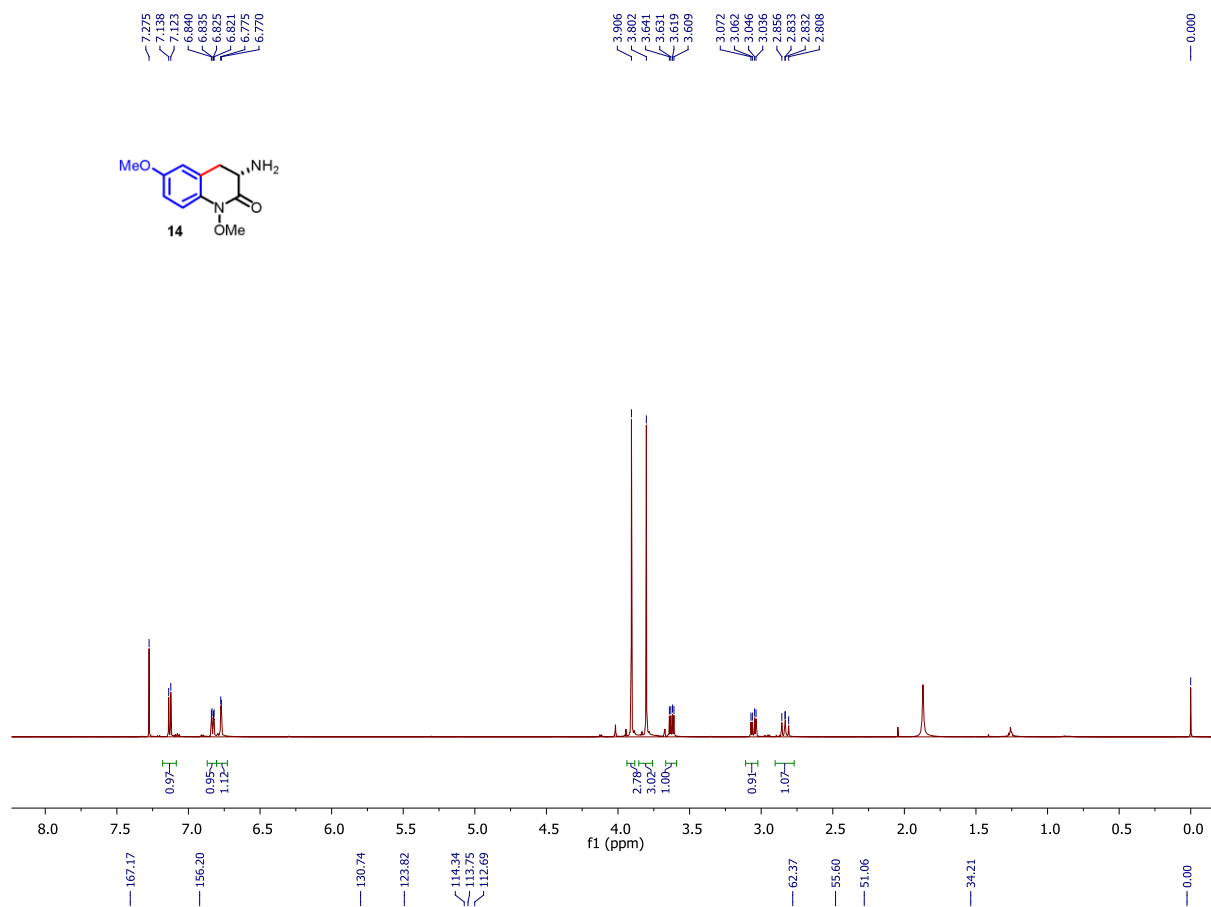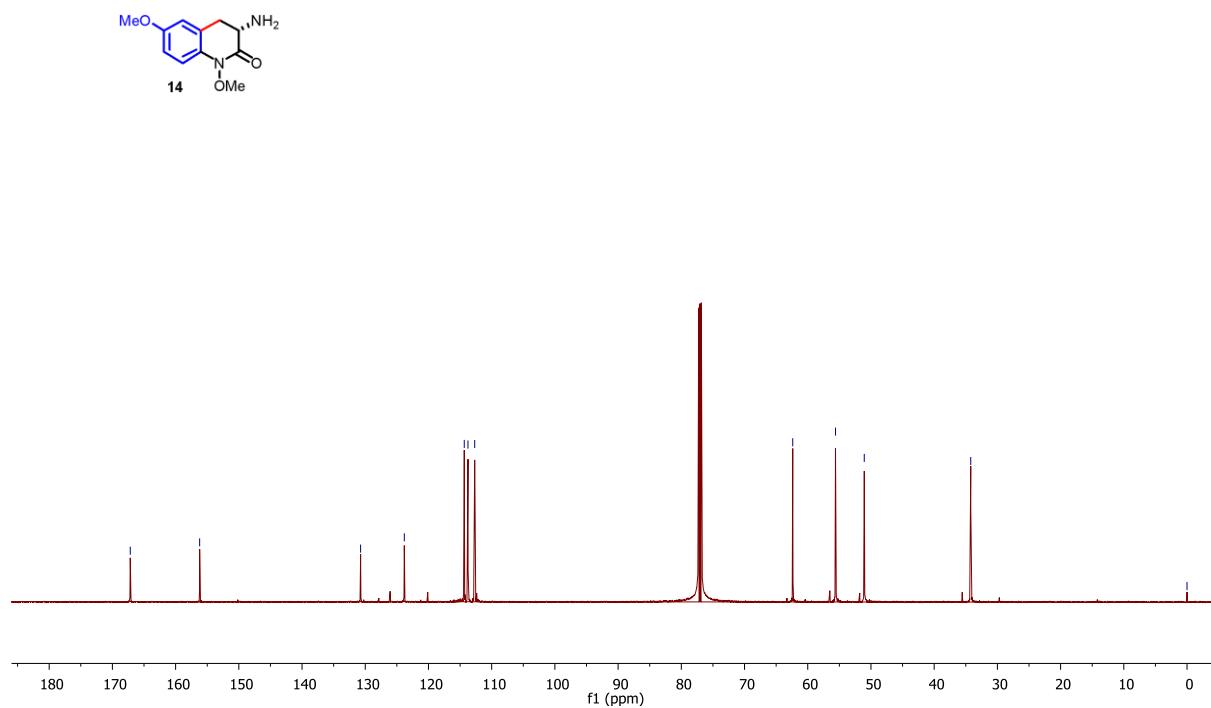

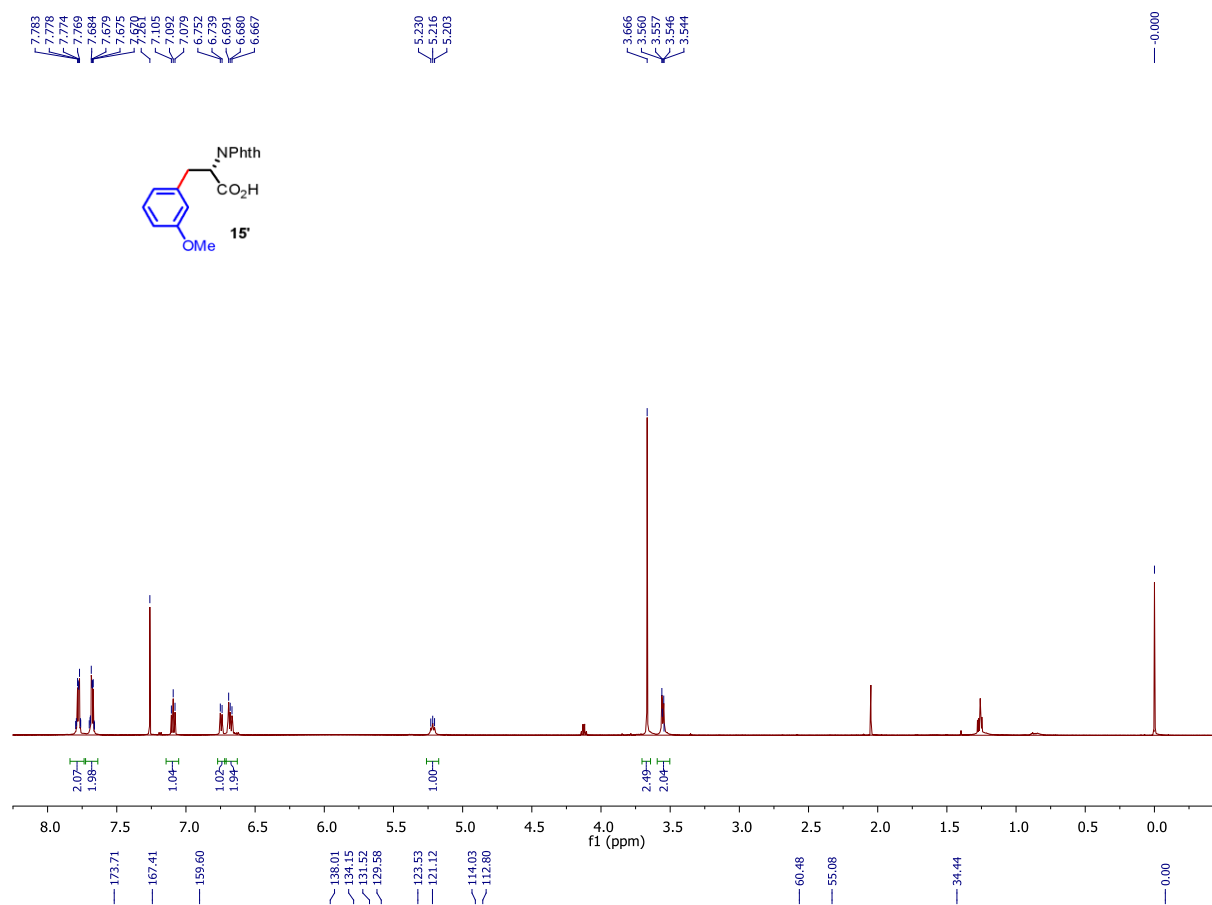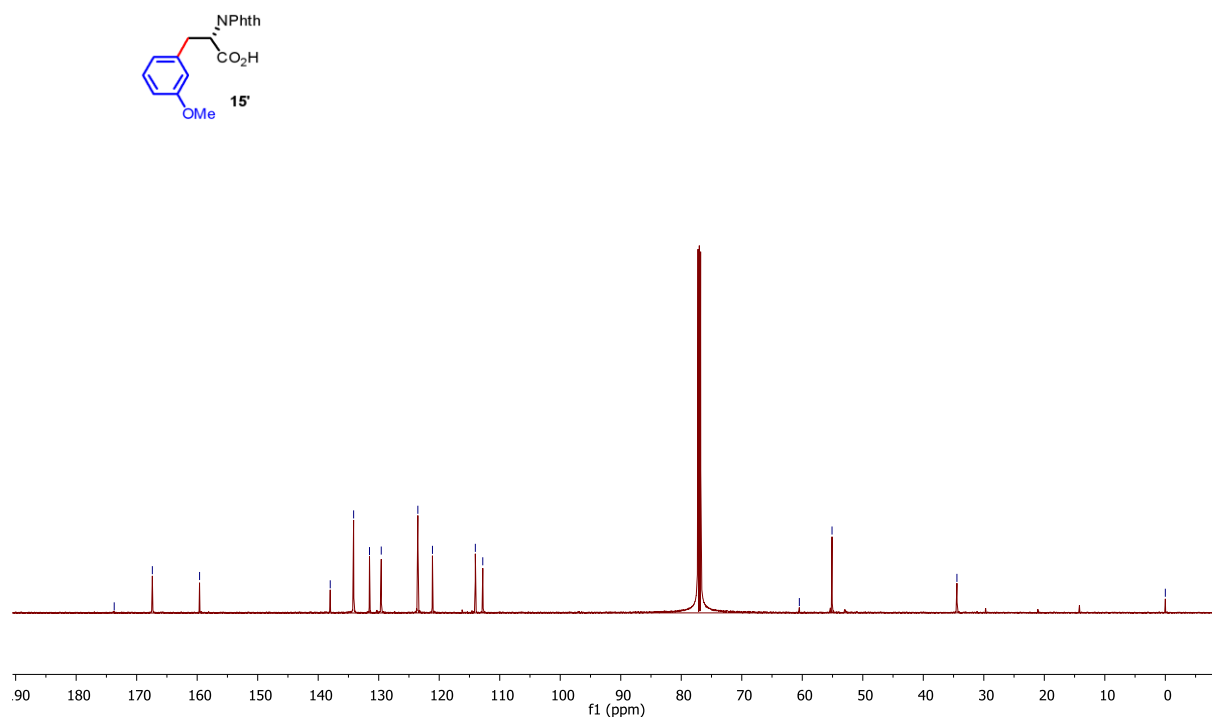

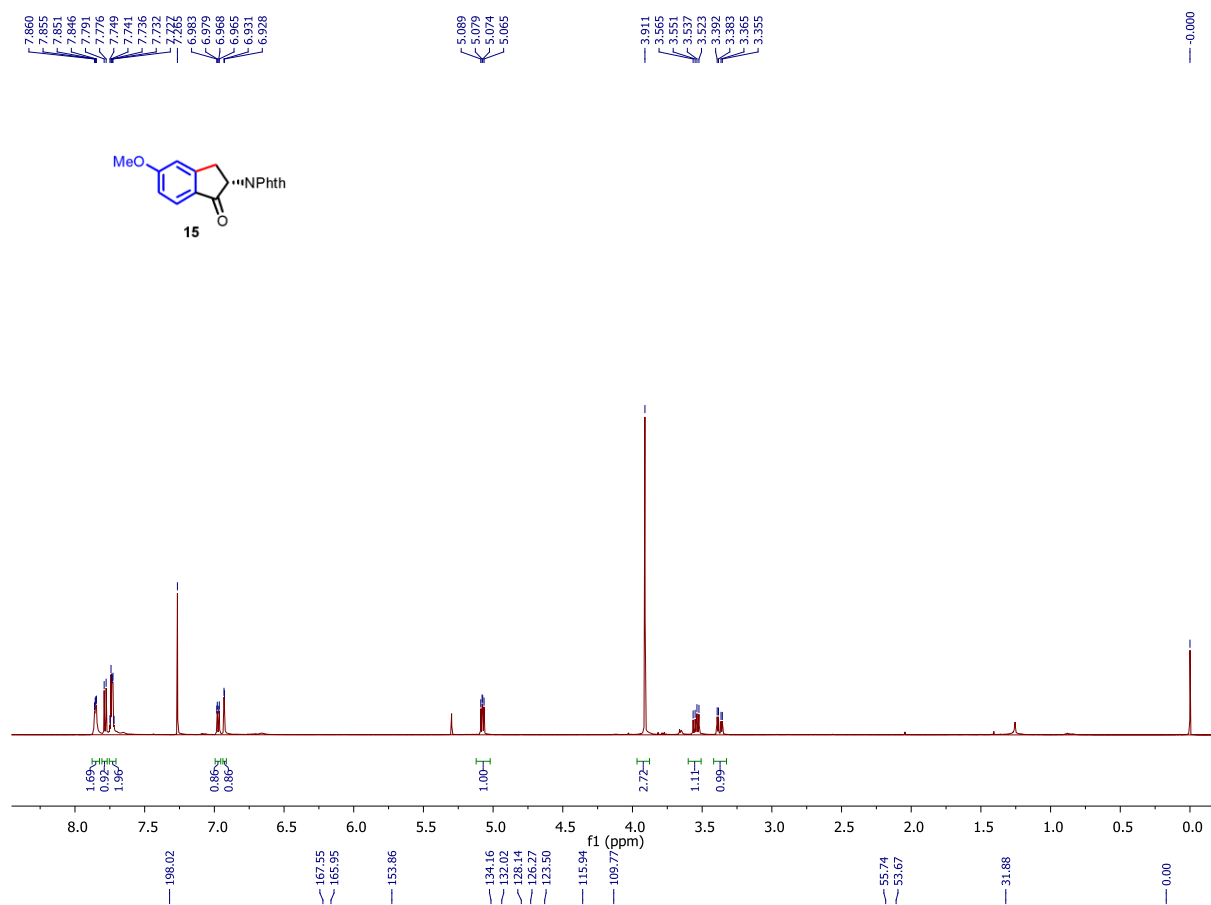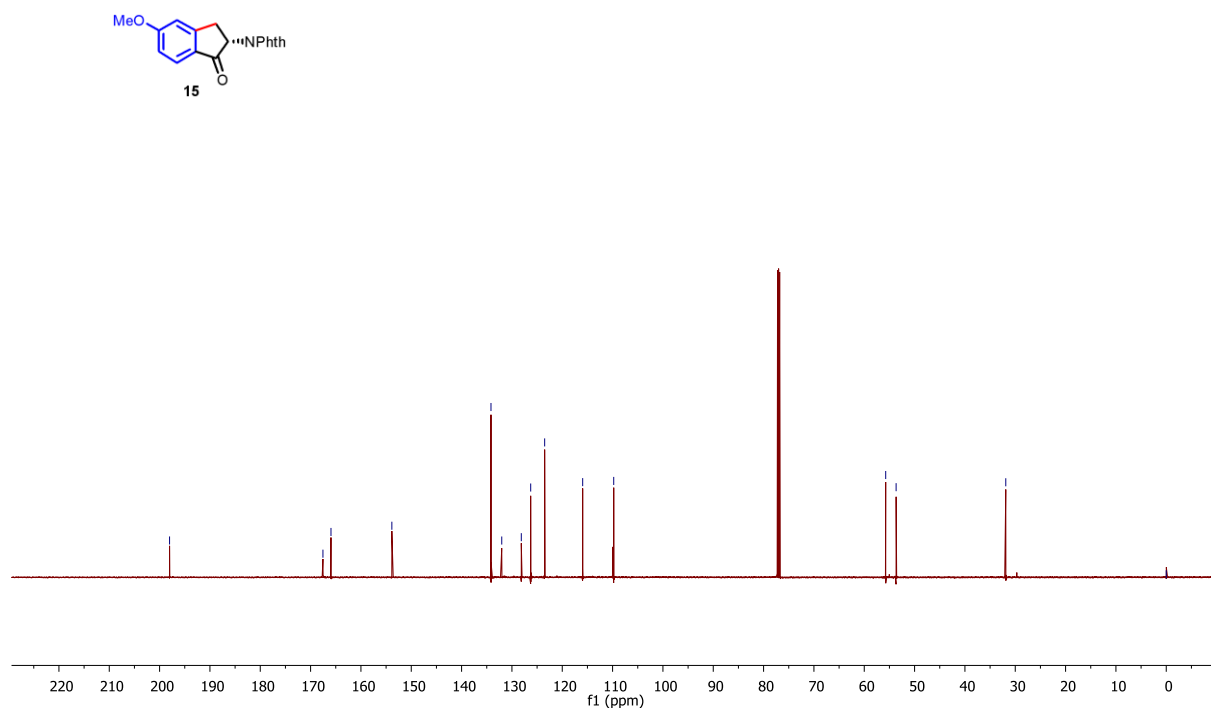

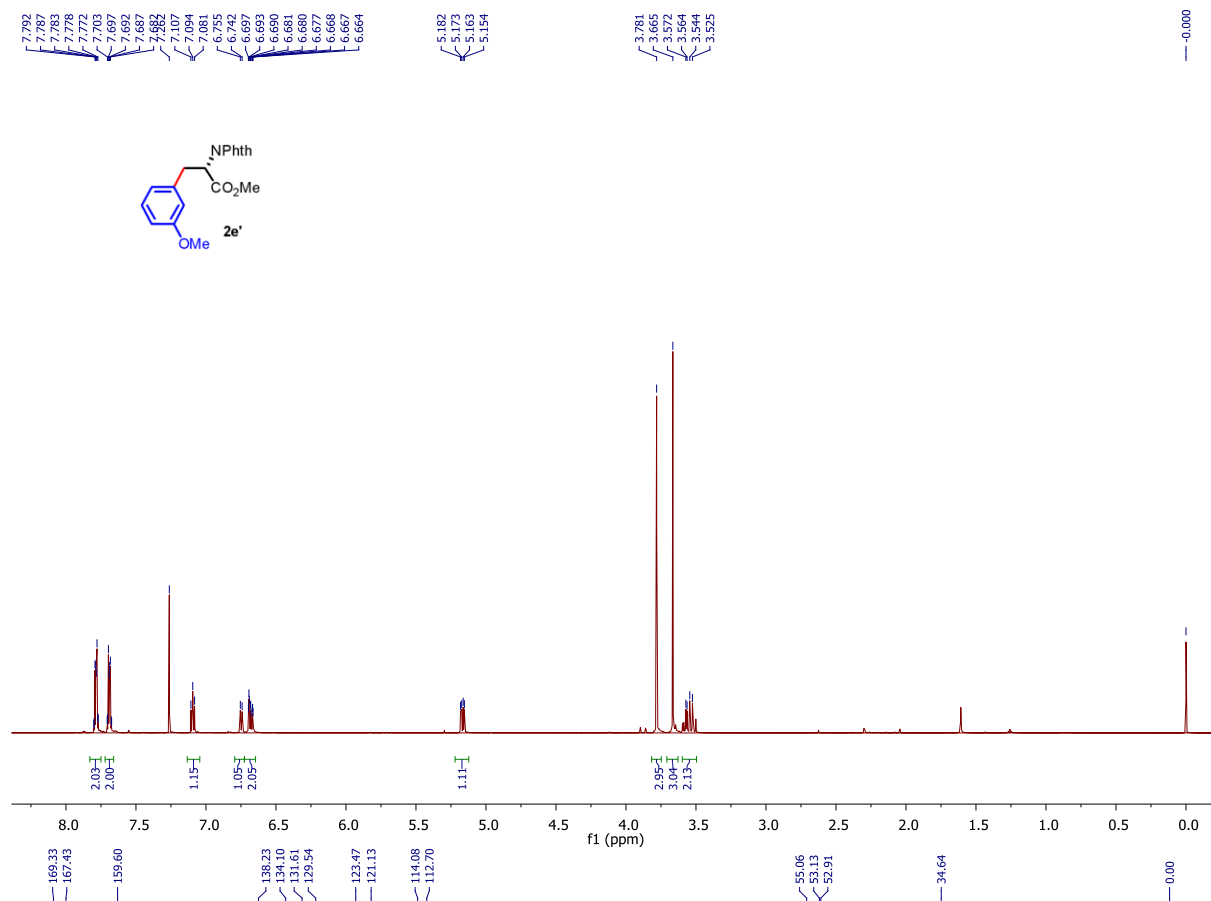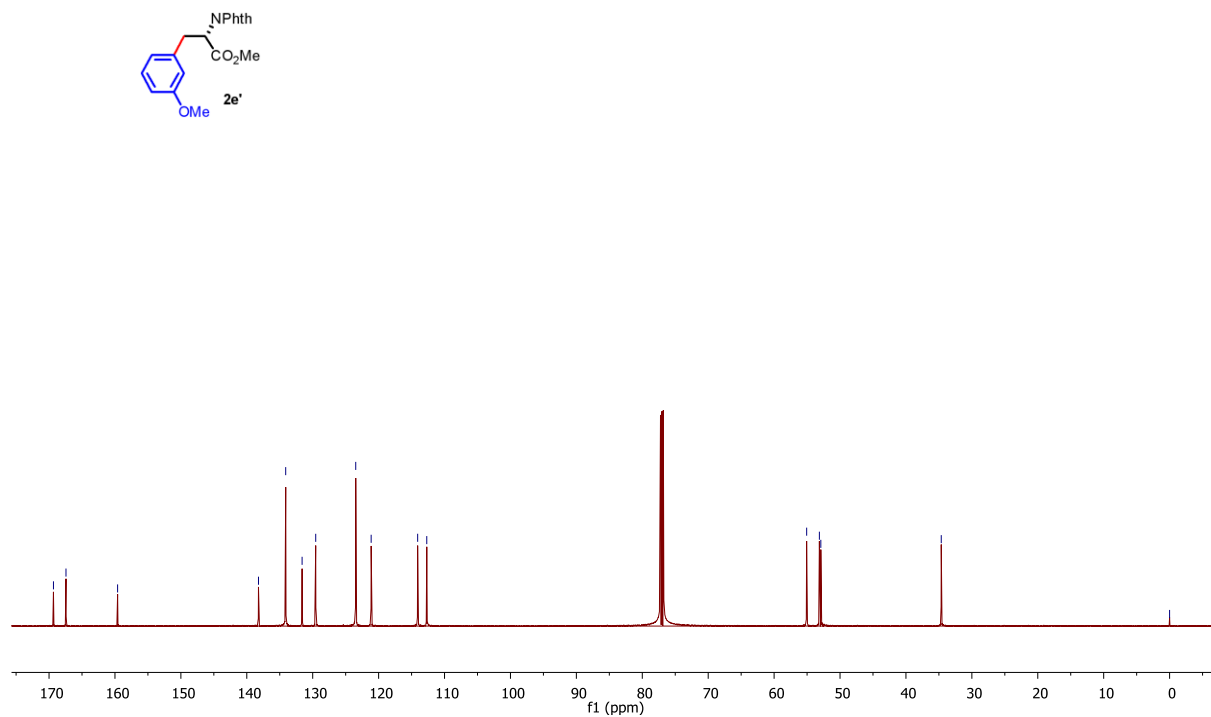

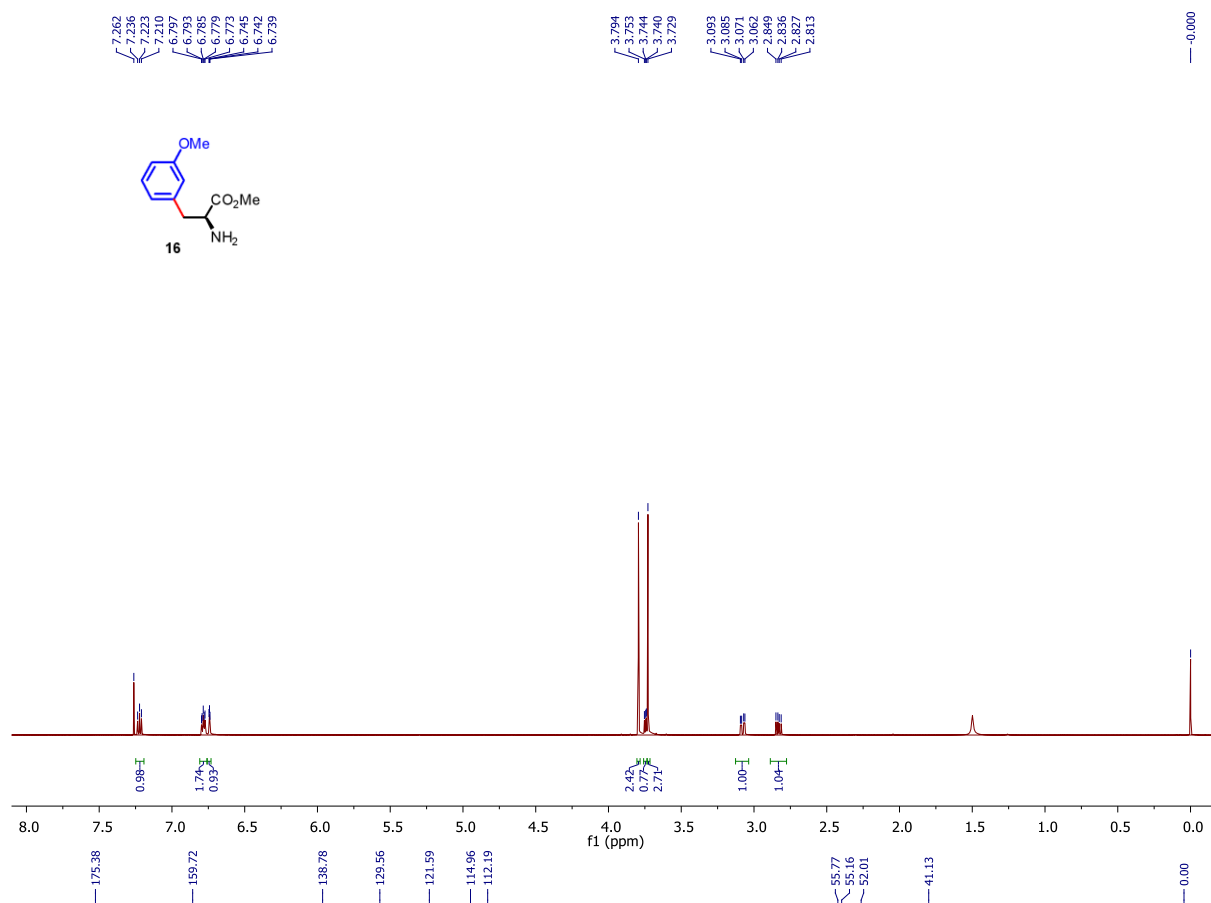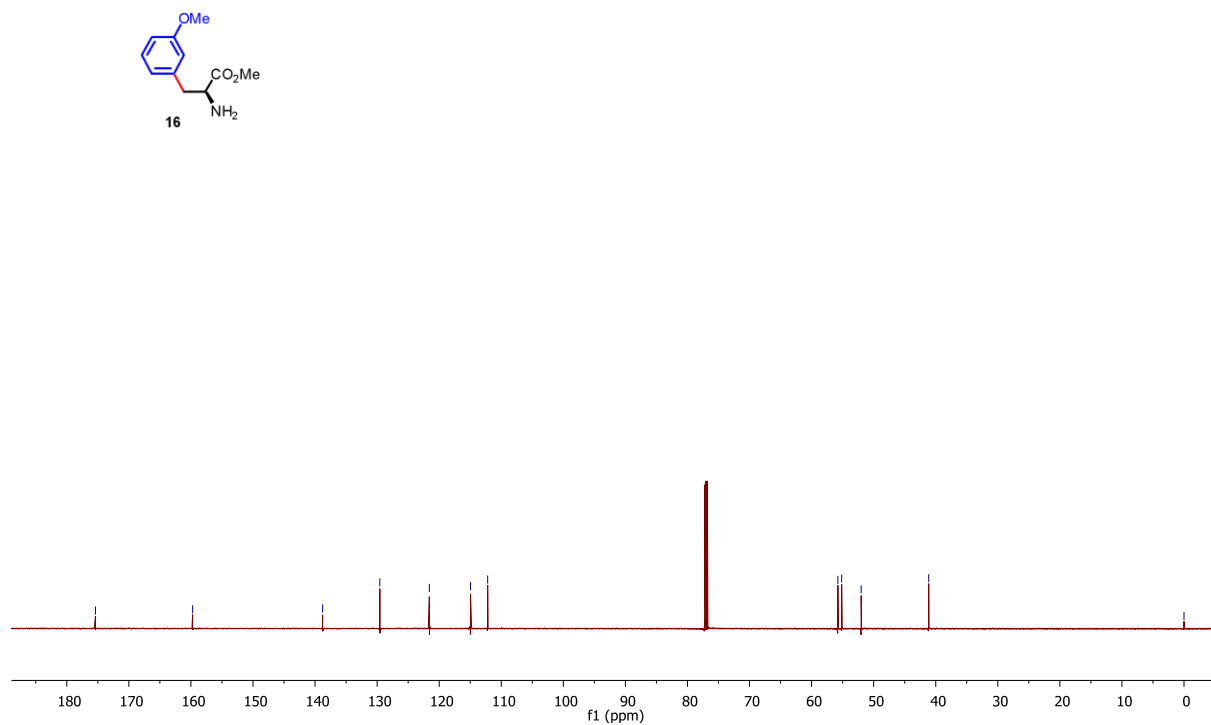

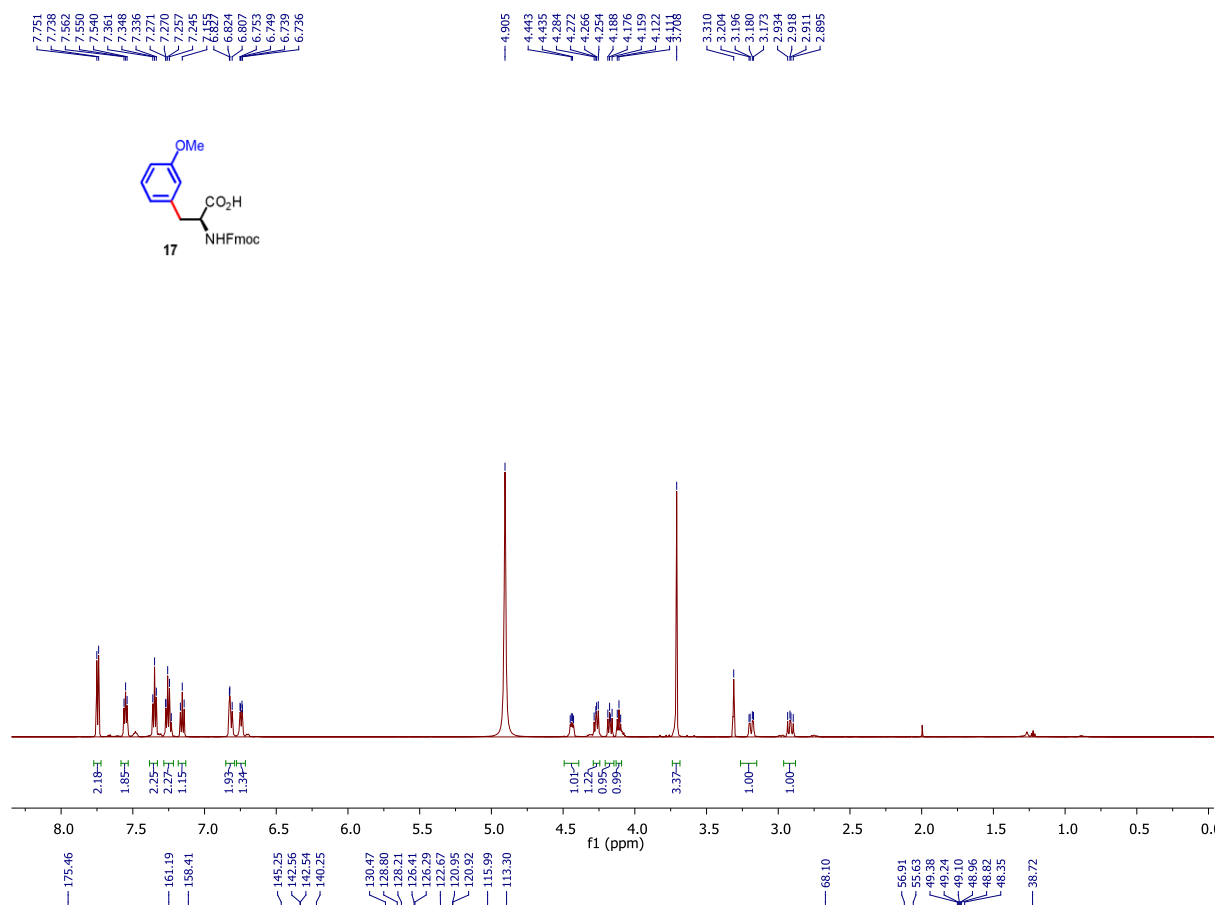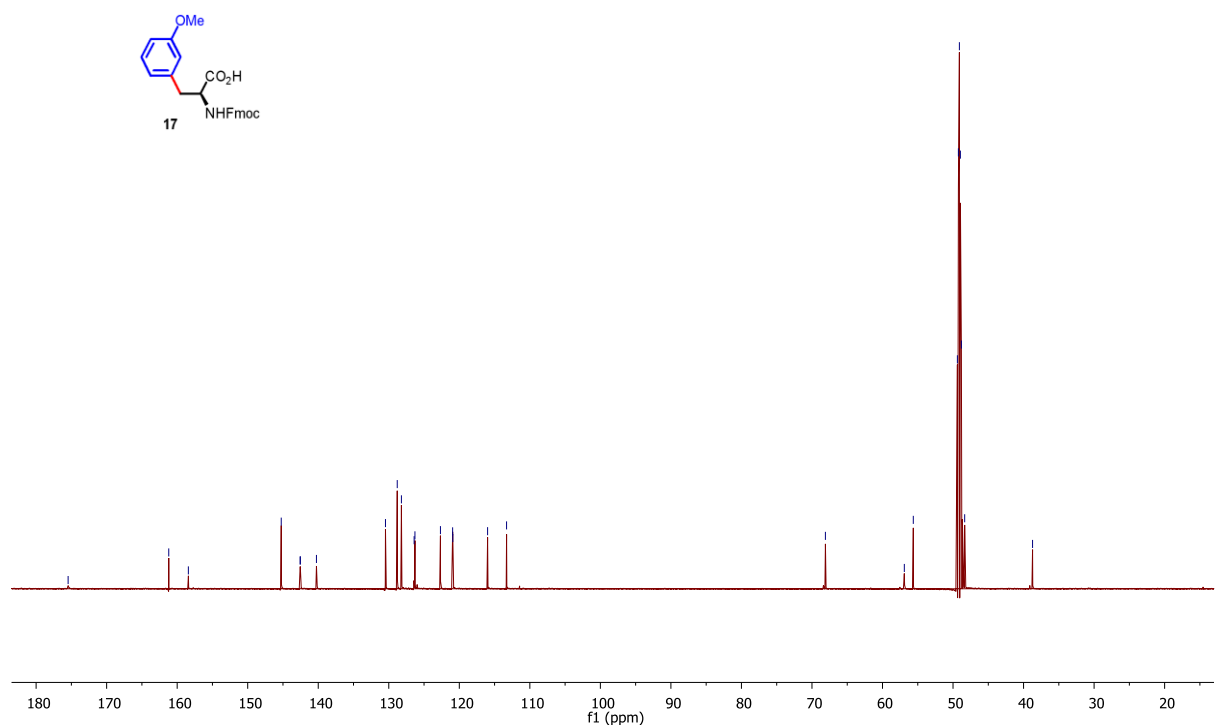



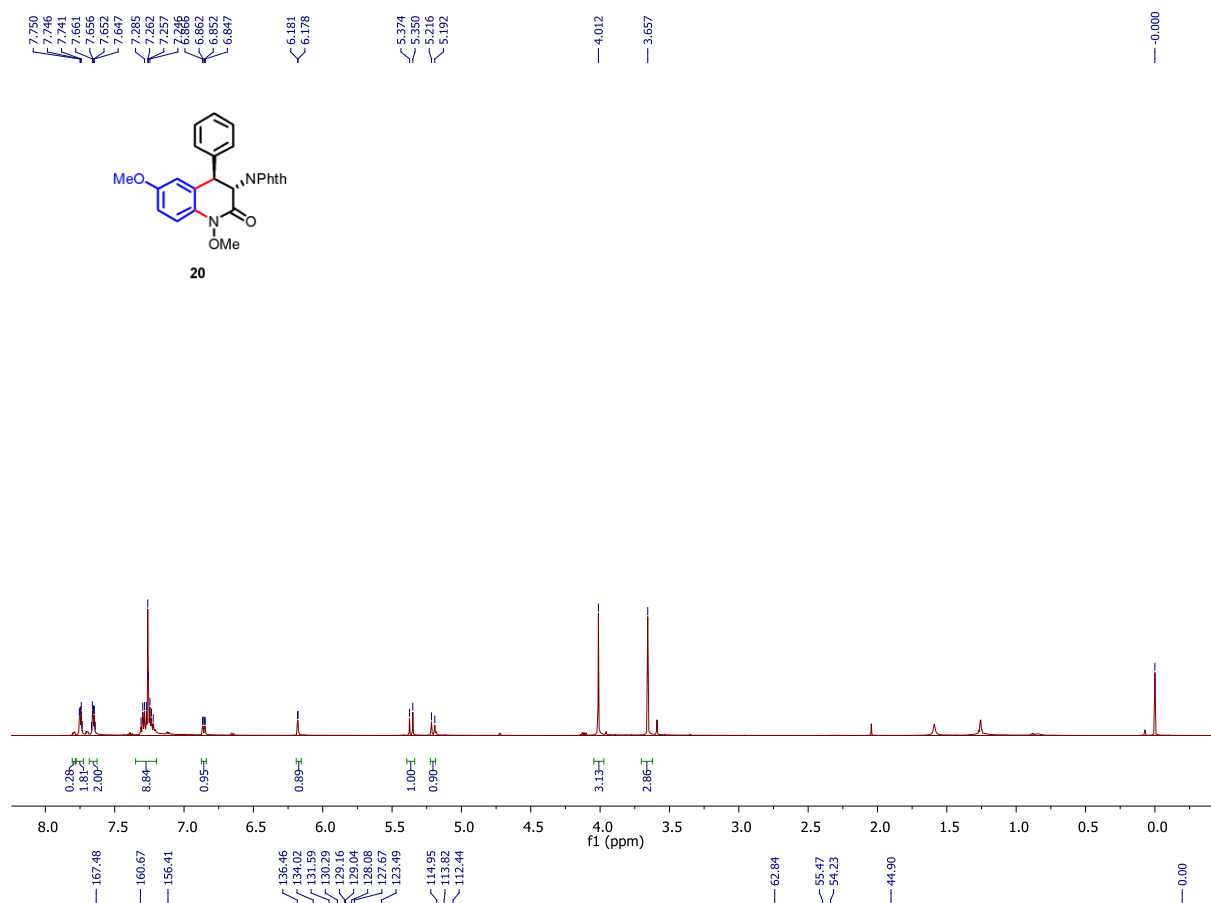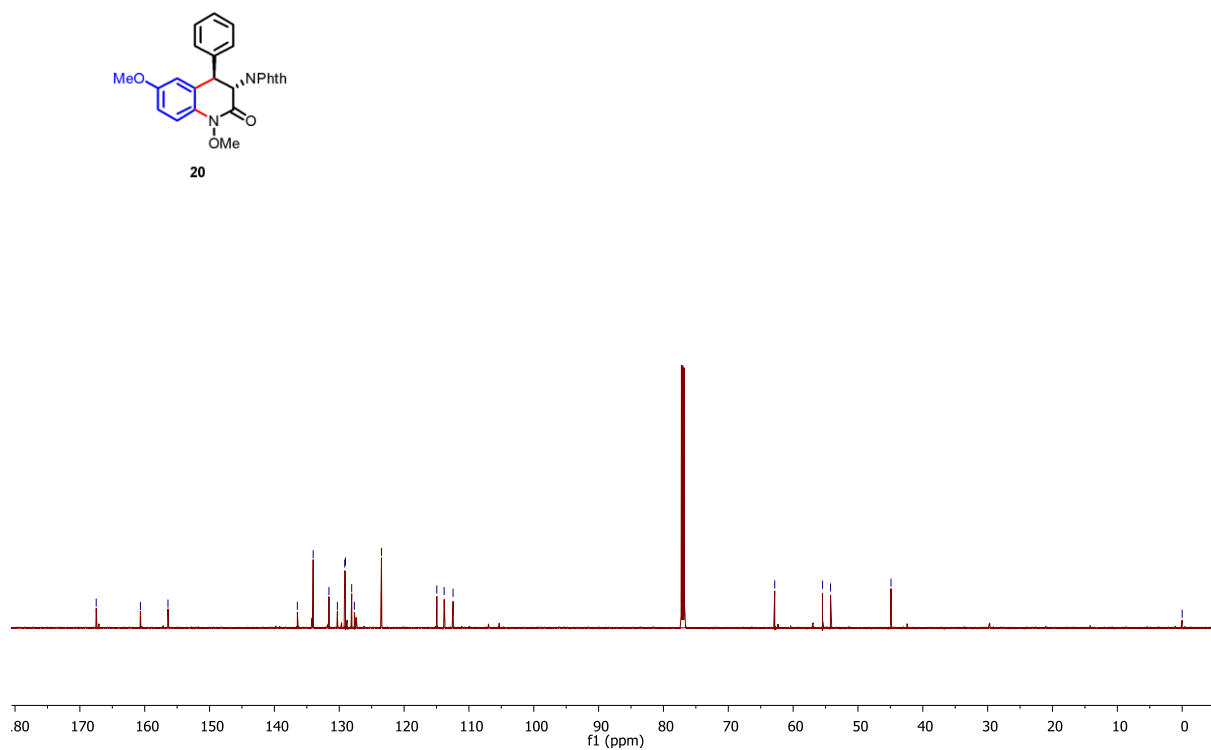

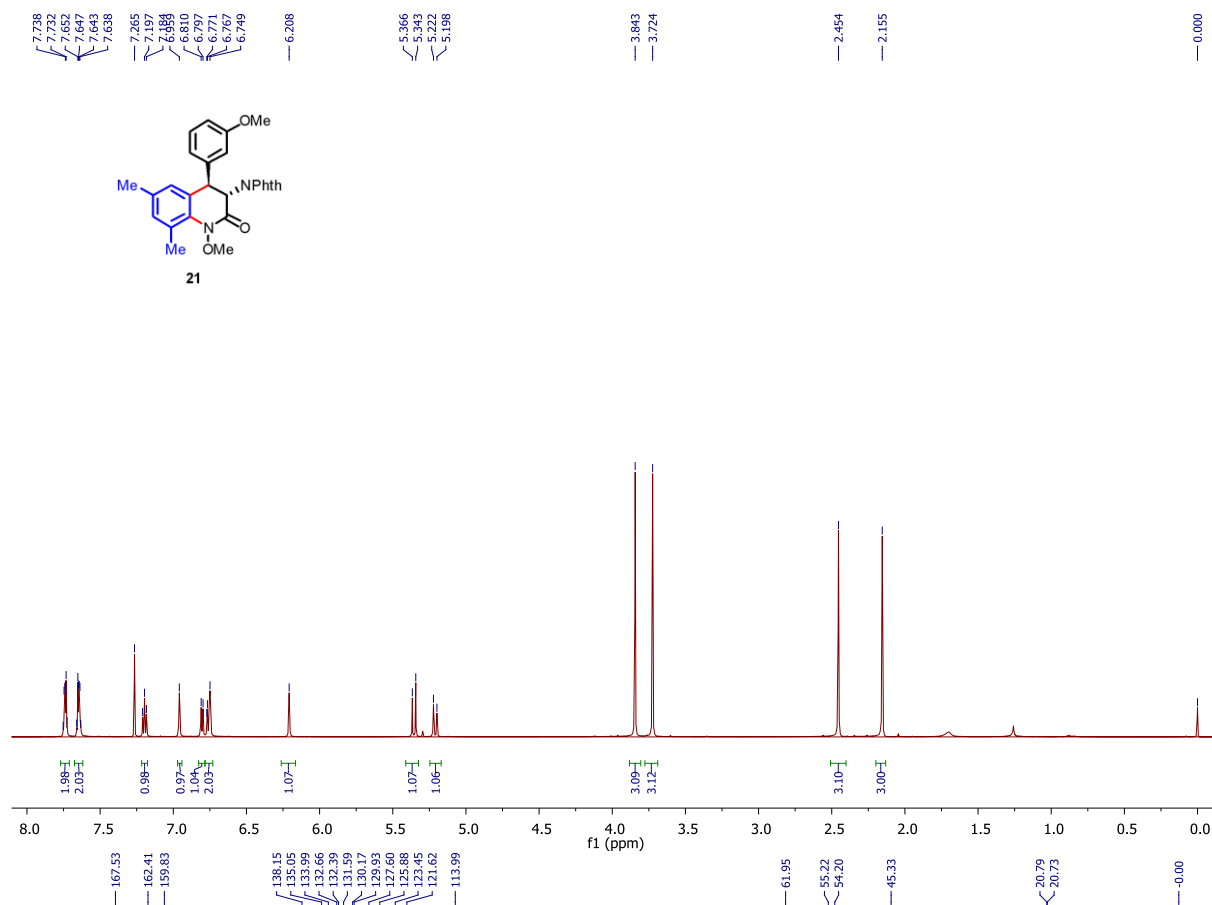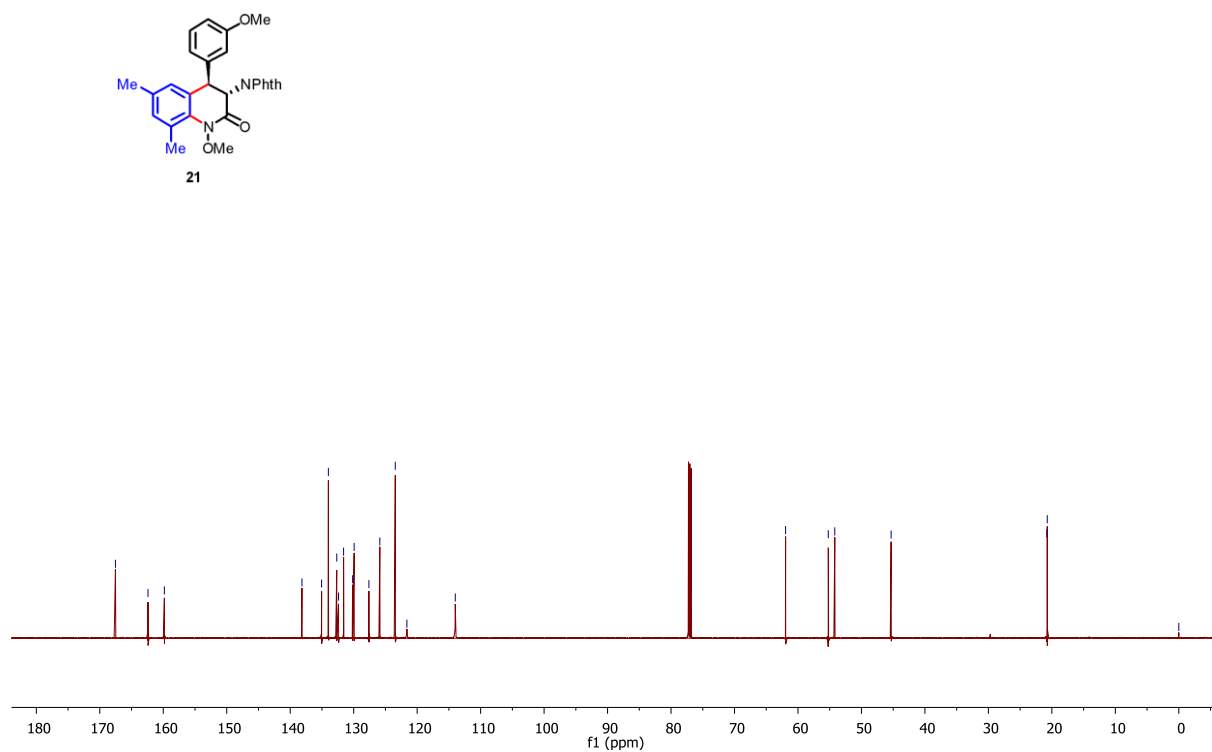

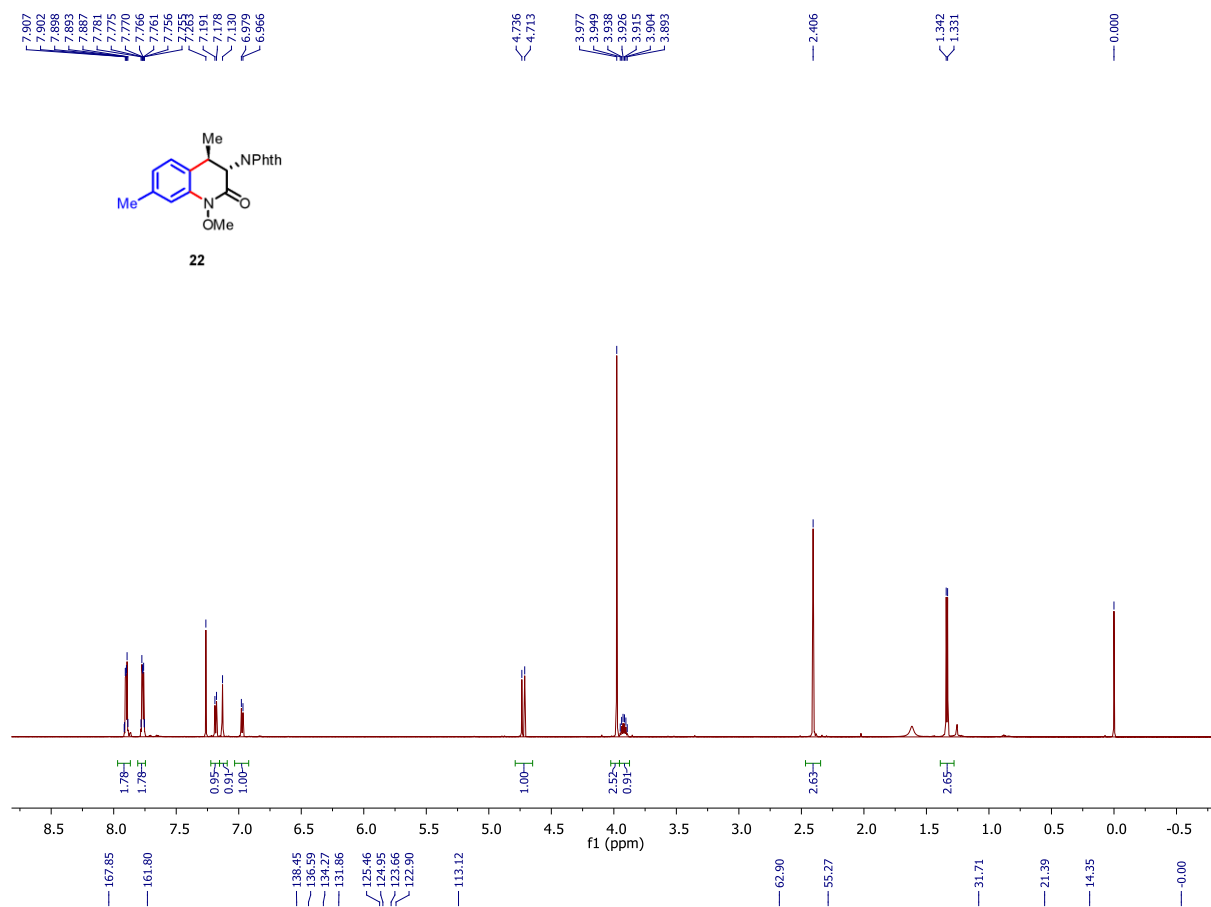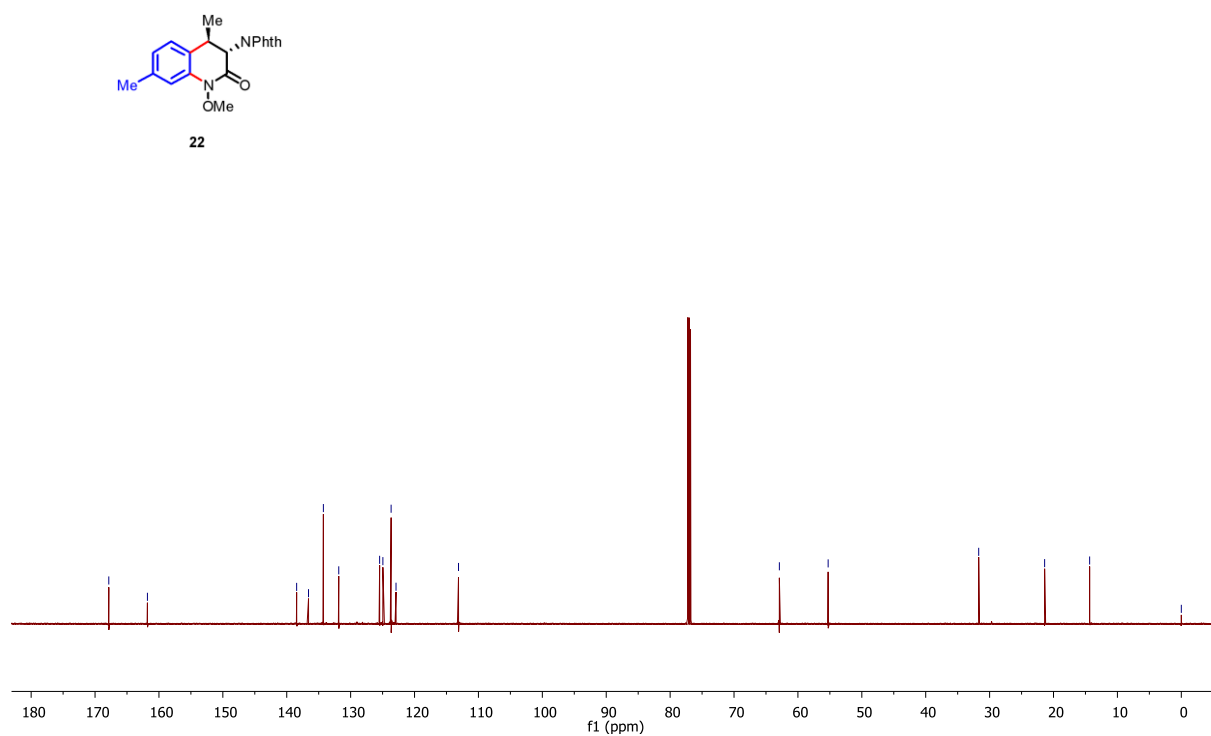

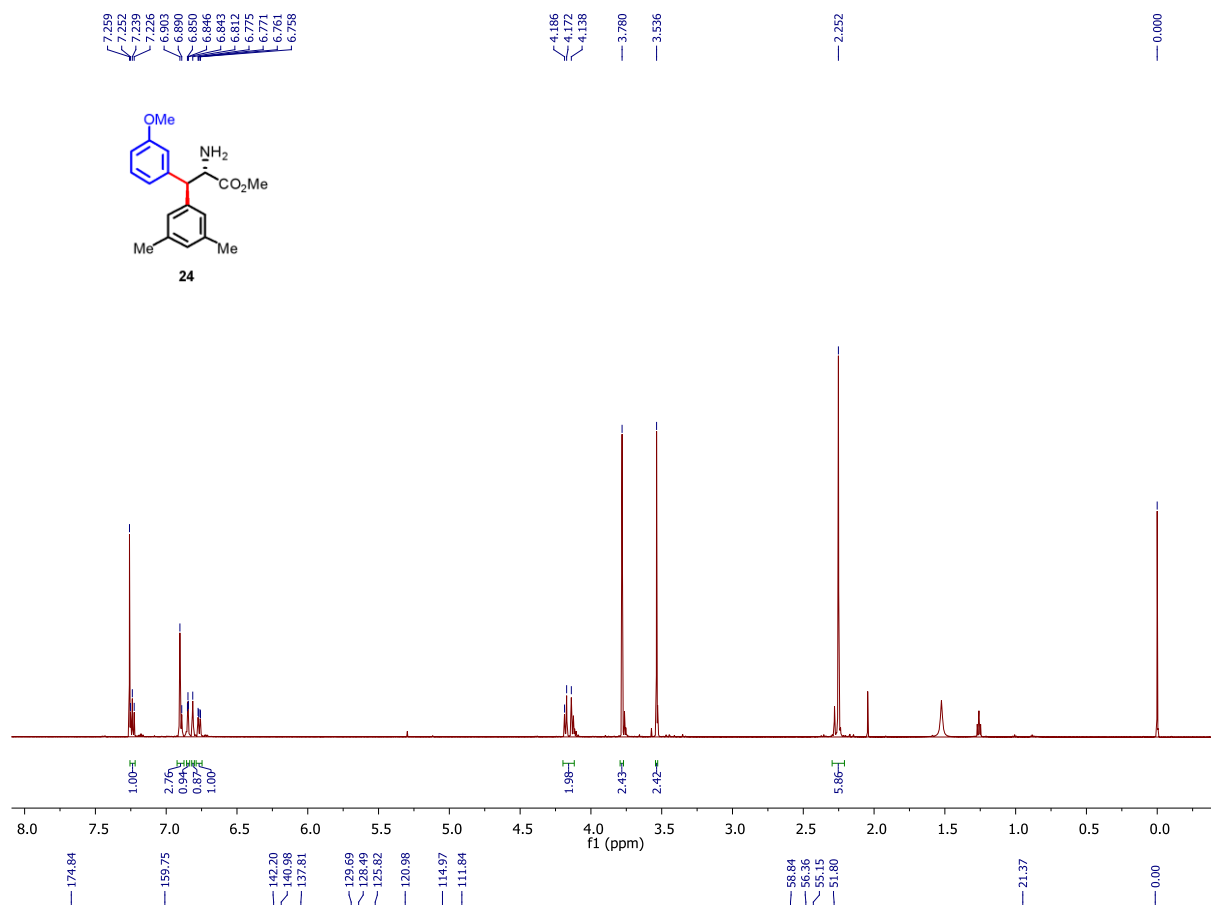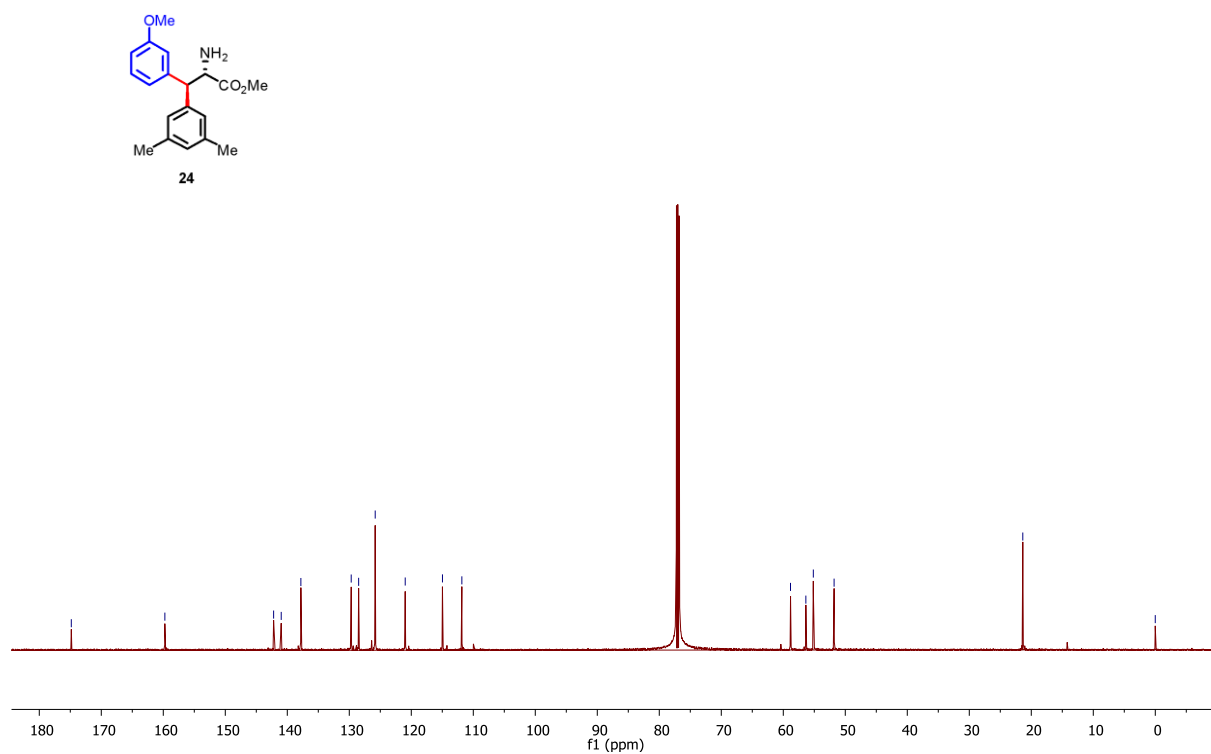

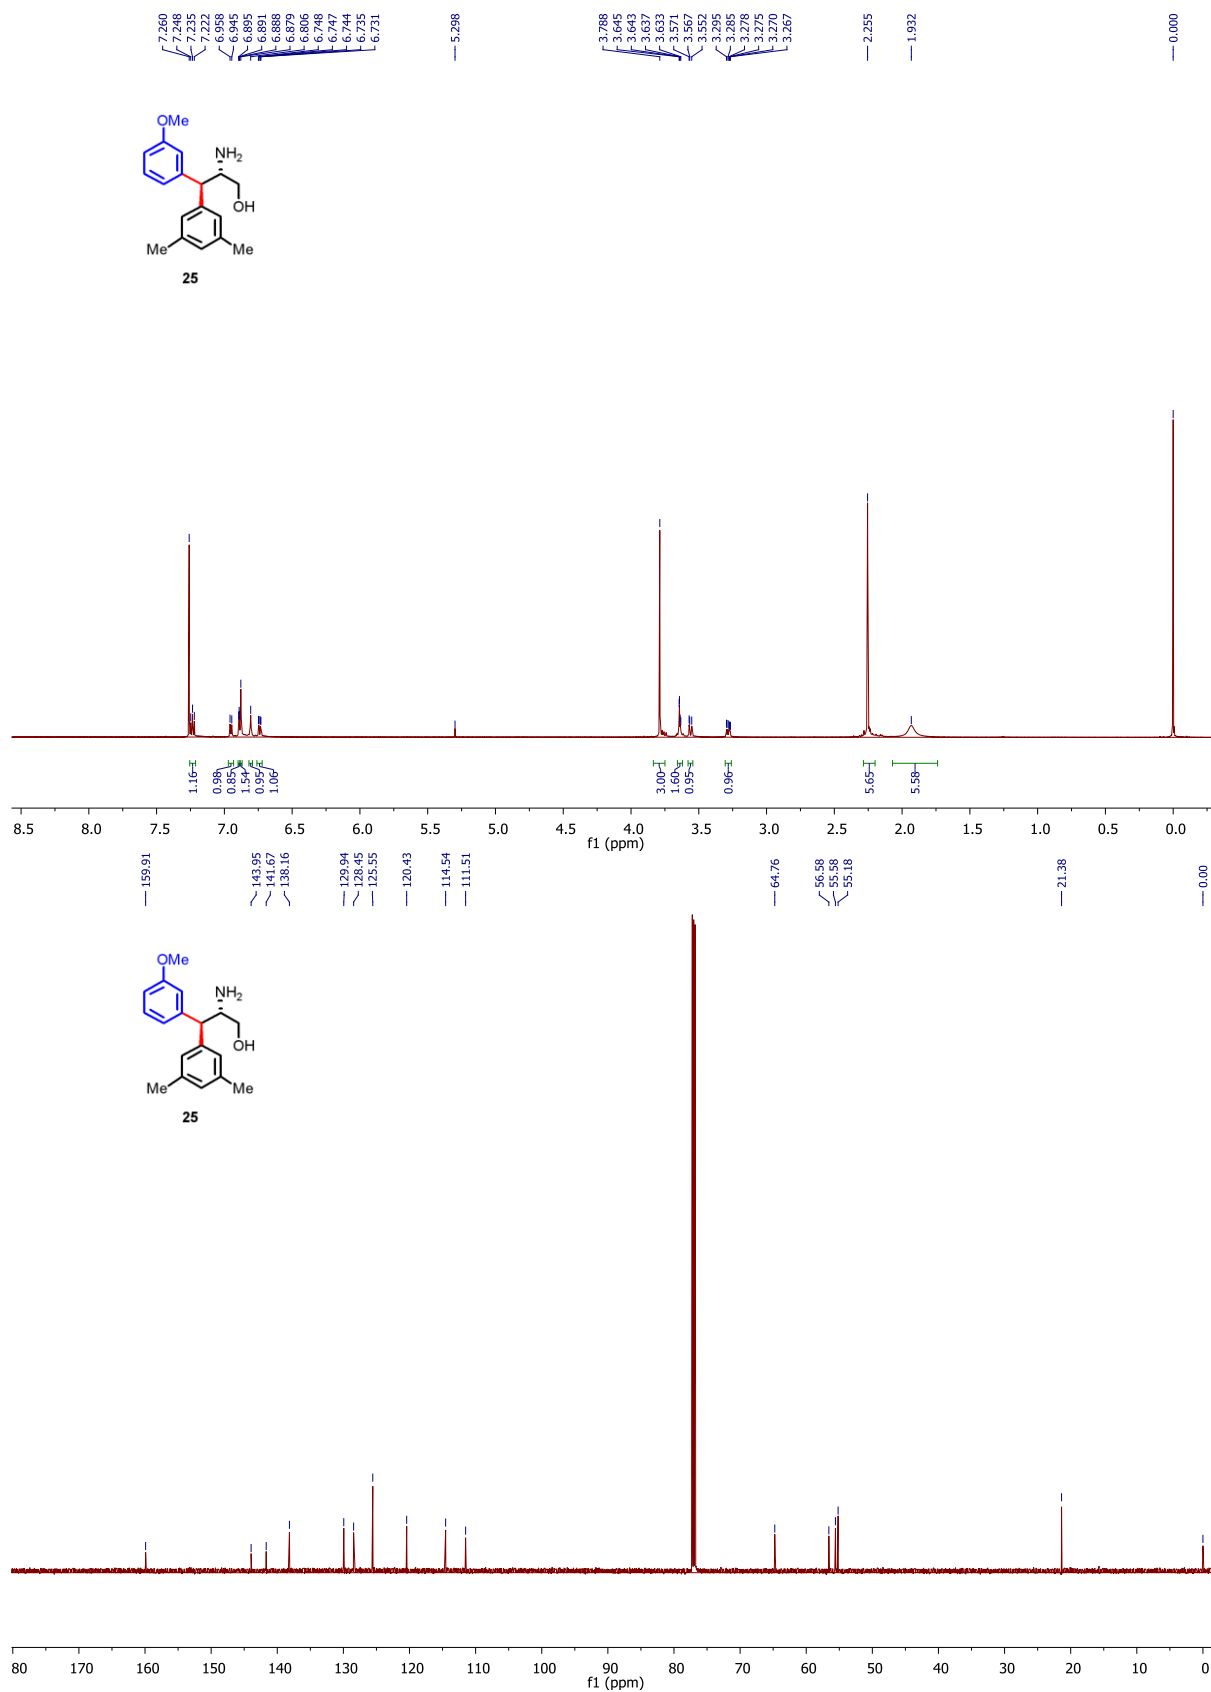

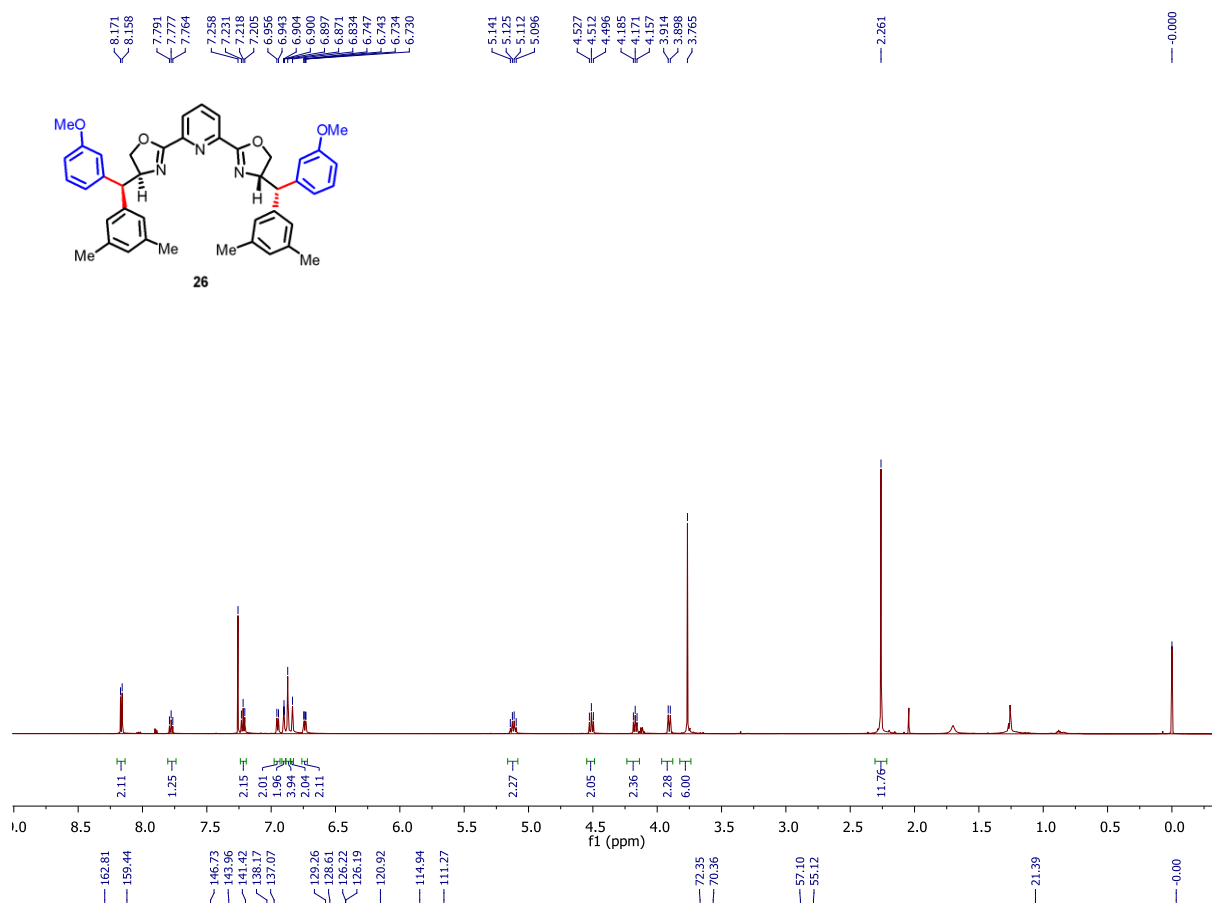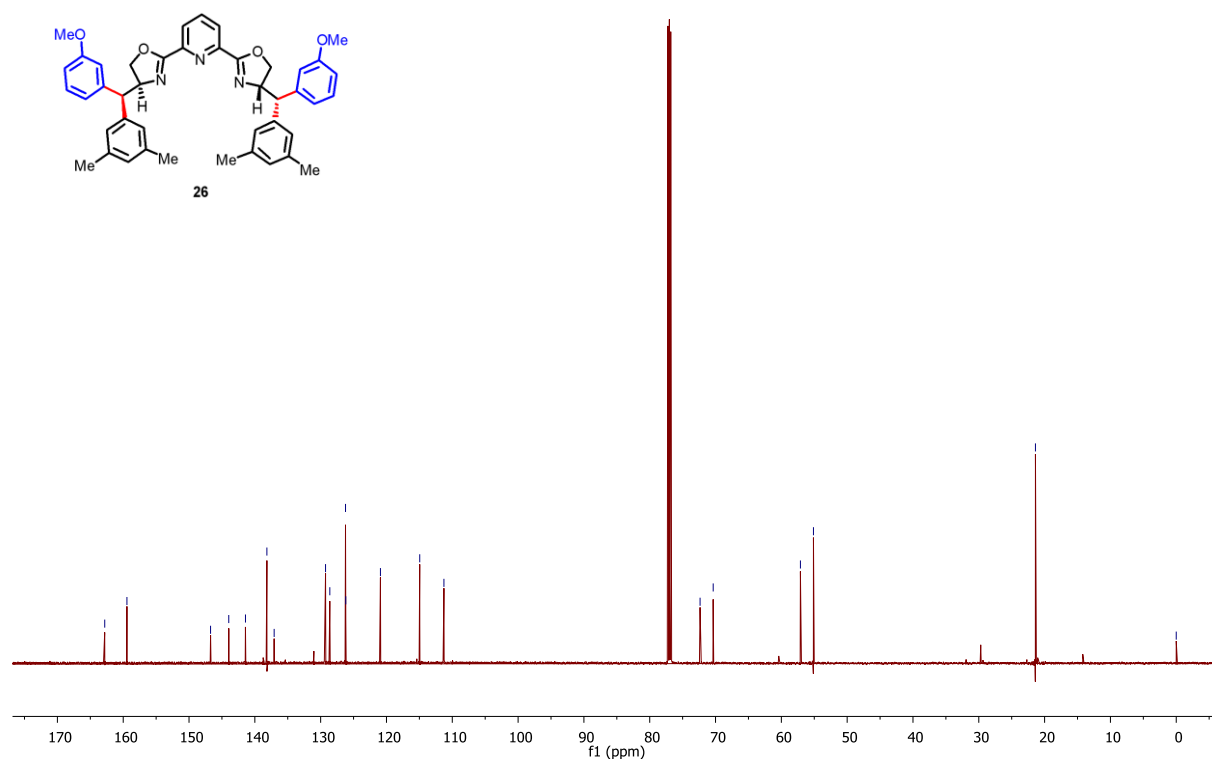

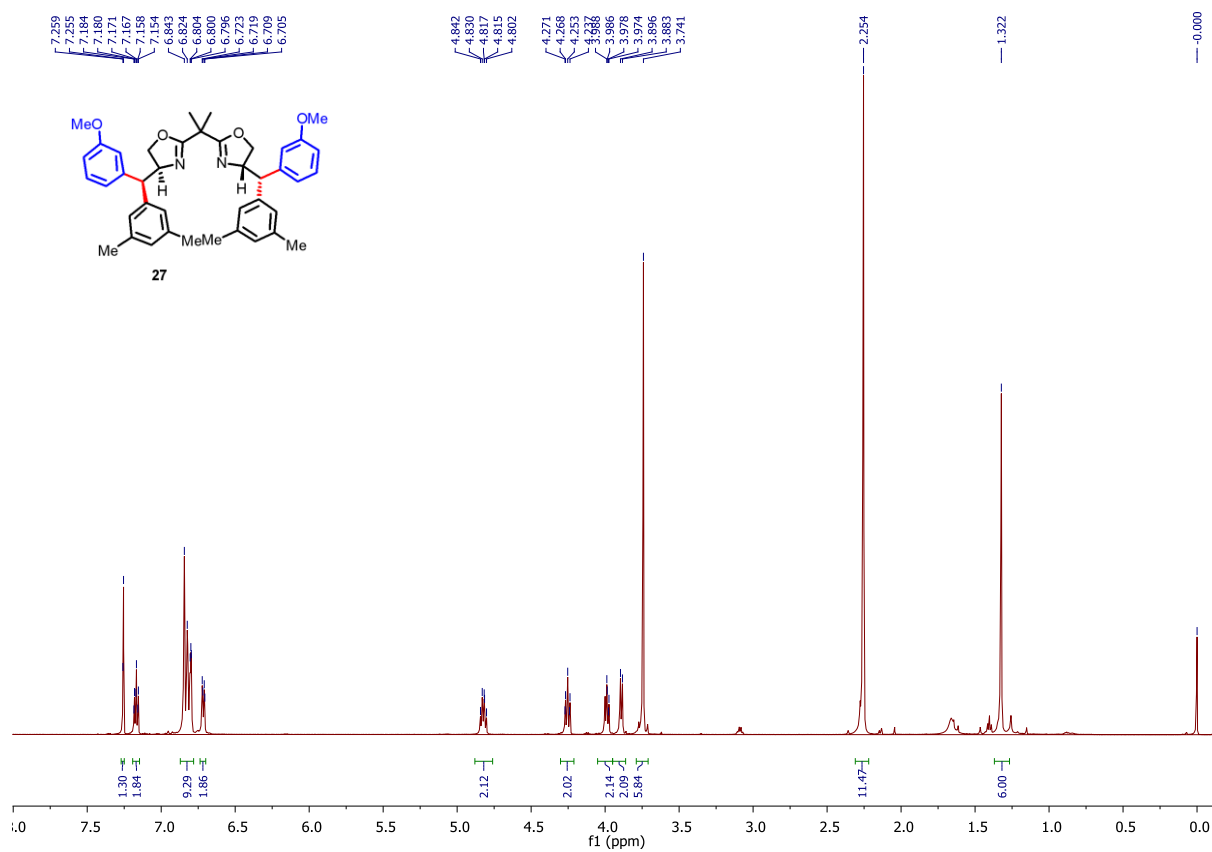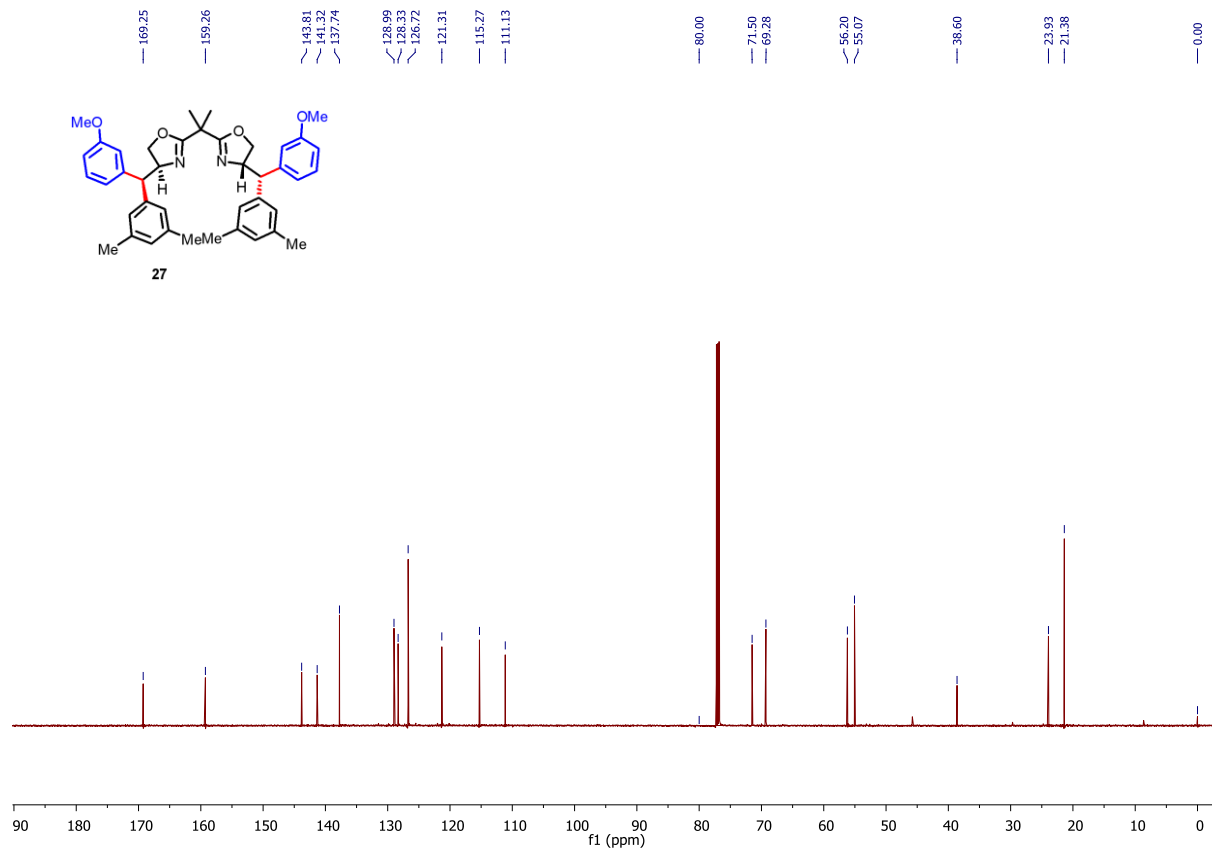

Supplement: Supplementary file 1 [file 3821482]
